# Supplementary material for: Adaptive Finite-time Fault-tolerant control of UAV sagainst Combined Faults
Source: Research Square preprint supplement (doi:10.21203/rs.3.rs-6869399/v1), 2025-07-15
Supplement: Supplementary file 1 [file e66b067354dfab1cb2809a2c.xlsx]

## Sheet: Sheet1
theta1					theta2:						theta3:
0	0	0	0			0	0	0	0			0	0	0	0
0	0	0	0.000489779			0	0	0	0.000489779			0	0	0	0.000489779
0	0	0	0.00195712			0	0	0	0.00195712			0	0	0	0.00195712
0	0	0	0.00439714			0	0	0	0.00439714			0	0	0	0.00439714
0	0	0	0.00780362			0	0	0	0.00780362			0	0	0	0.00780362
0	0	0	0.01217			0	0	0	0.01217			0	0	0	0.01217
0	0	0	0.0174899			0	0	0	0.0174899			0	0	0	0.0174899
0	0	0	0.0237574			0	0	0	0.0237574			0	0	0	0.0237574
0	0	0	0.0309673			0	0	0	0.0309673			0	0	0	0.0309673
0	0	0	0.0391149			0	0	0	0.0391149			0	0	0	0.0391149
0	0	0	0.0481963			0	0	0	0.0481963			0	0	0	0.0481963
0	0	0	0.0582082			0	0	0	0.0582082			0	0	0	0.0582082
0	0	0	0.0691475			0	0	0	0.0691475			0	0	0	0.0691475
0	0	0	0.081012			0	0	0	0.081012			0	0	0	0.081012
0	0	0	0.0937996			0	0	0	0.0937996			0	0	0	0.0937996
0	0	0	0.107509			0	0	0	0.107509			0	0	0	0.107509
0	0	0	0.122138			0	0	0	0.122138			0	0	0	0.122138
0	0	0	0.137686			0	0	0	0.137686			0	0	0	0.137686
0	0	0	0.154152			0	0	0	0.154152			0	0	0	0.154152
0	0	0	0.171535			0	0	0	0.171535			0	0	0	0.171535
0	0	0	0.189835			1.57891e-06	-2.32078e-06	3.05644e-06	0.189835			0	0	0	0.189835
0	0	0	0.20905			6.16348e-06	-1.10837e-05	1.44367e-05	0.20905			0	0	0	0.20905
0	0	0	0.229182			1.54954e-05	-3.0835e-05	3.99838e-05	0.229182			0	0	0	0.229182
0	0	0	0.250228			3.1456e-05	-6.64645e-05	8.5998e-05	0.250228			0	0	0	0.250228
0	0	0	0.27219			5.6086e-05	-0.000123284	0.000159342	0.27219			0	0	0	0.27219
0	0	0	0.295066			9.15668e-05	-0.000207014	0.000267435	0.295066			0	0	0	0.295066
0	0	0	0.318857			0.000140181	-0.000323697	0.000418157	0.318857			0	0	0	0.318857
0	0	0	0.343562			0.000204261	-0.000479573	0.000619705	0.343562			0	0	0	0.343562
0	0	0	0.369181			0.000286134	-0.00068093	0.000880429	0.369181			0	0	0	0.369181
0	0	0	0.395714			0.000388059	-0.000933952	0.00120866	0.395714			0	0	0	0.395714
0	0	0	0.423161			0.000512179	-0.00124457	0.00161252	0.423161			0	0	0	0.423161
0	0	0	0.451522			0.000660462	-0.00161832	0.0020998	0.451522			0	0	0	0.451522
0	0	0	0.480797			0.000834656	-0.00206021	0.00267779	0.480797			0	0	0	0.480797
0	0	0	0.510986			0.00103625	-0.00257462	0.00335313	0.510986			0	0	0	0.510986
0	0	0	0.542089			0.00126645	-0.0031652	0.00413174	0.542089			0	0	0	0.542089
0	0	0	0.574105			0.00152614	-0.0038348	0.00501872	0.574105			0	0	0	0.574105
0	0	0	0.607035			0.00181588	-0.00458547	0.00601829	0.607035			0	0	0	0.607035
0	0	0	0.640879			0.00213592	-0.00541837	0.00713373	0.640879			0	0	0	0.640879
0	0	0	0.675637			0.00248619	-0.00633384	0.00836742	0.675637			0	0	0	0.675637
0	0	0	0.711308			0.00286631	-0.00733144	0.00972082	0.711308			0	0	0	0.711308
0	0	0	0.747893			0.00327563	-0.00840992	0.0111945	0.747893			0	0	0	0.747893
0	0	0	0.785391			0.00371326	-0.00956739	0.0127883	0.785391			0	0	0	0.785391
0	0	0	0.823803			0.00417811	-0.0108013	0.0145011	0.823803			0	0	0	0.823803
0	0	0	0.863129			0.00466891	-0.0121088	0.0163315	0.863121			0	0	0	0.863121
0	0	0	0.903368			0.00518426	-0.0134862	0.0182771	0.903317			0	0	0	0.903317
0	0	0	0.944521			0.00572266	-0.0149299	0.0203353	0.944342			0	0	0	0.944342
0	0	0	0.986588			0.00628257	-0.0164359	0.0225031	0.986112			0	0	0	0.986112
0	0	0	1.02957			0.00686241	-0.0180001	0.0247772	1.02851			0	0	0	1.02851
0	0	0	1.07346			0.0074606	-0.0196182	0.0271541	1.07137			0	0	0	1.07137
0	0	0	1.11827			0.0080756	-0.021286	0.0296302	1.1145			0	0	0	1.1145
0	0	0	1.16399			0.00870587	-0.0229994	0.0322019	1.15767			0	0	0	1.15767
0	0	0	1.21062			0.00934998	-0.0247543	0.0348655	1.20062			0	0	0	1.20062
0	0	0	1.25817			0.0100065	-0.0265466	0.0376174	1.24312			0	0	0	1.24312
0	0	0	1.30663			0.0106742	-0.0283726	0.0404543	1.28495			0	0	0	1.28495
1.83849e-07	-1.27122e-08	2.10976e-07	1.35601			0.0113517	-0.0302285	0.0433728	1.32592			1.83849e-07	-1.27122e-08	0	1.32592
2.13206e-06	-4.53439e-06	6.25634e-06	1.40629			0.0120379	-0.0321109	0.0463698	1.36587			2.13206e-06	-4.53439e-06	0	1.36587
7.76986e-06	-1.82174e-05	2.42485e-05	1.45745			0.0127316	-0.0340162	0.0494421	1.4047			7.76986e-06	-1.82174e-05	0	1.4047
1.95866e-05	-4.75535e-05	6.25085e-05	1.50945			0.0134319	-0.0359413	0.052587	1.44234			1.95866e-05	-4.75535e-05	0	1.44234
4.06274e-05	-0.000100526	0.000131294	1.56221			0.0141378	-0.0378831	0.0558017	1.47881			4.06274e-05	-0.000100526	0	1.47881
7.44693e-05	-0.000186597	0.000242799	1.61565			0.0148483	-0.0398385	0.0590837	1.51418			7.44693e-05	-0.000186597	0	1.51418
0.000125117	-0.000316451	0.000410875	1.66961			0.0155626	-0.0418047	0.0624307	1.54858			0.000125117	-0.000316451	5.73332e-06	1.54858
0.000196848	-0.000501603	0.000650568	1.72396			0.0162799	-0.043779	0.0658403	1.58215			0.000196848	-0.000501603	2.32451e-05	1.58215
0.000294028	-0.000753903	0.000977568	1.77847			0.0169994	-0.0457586	0.0693105	1.61506			0.000294028	-0.000753903	6.12026e-05	1.61506
0.000420906	-0.001085	0.00140759	1.83293			0.0177205	-0.0477411	0.0728392	1.64745			0.000420906	-0.001085	0.00013053	1.64745
0.000578567	-0.00150393	0.00195182	1.8871			0.0184424	-0.0497239	0.0764245	1.67948			0.000578567	-0.00150393	0.000244416	1.67948
0.000763484	-0.00200315	0.0025999	1.94074			0.0191645	-0.0517045	0.0800646	1.71126			0.000763484	-0.00200315	0.000417996	1.71126
0.000972107	-0.00257402	0.00334047	1.99365			0.0198863	-0.0536806	0.0837576	1.74291			0.000972107	-0.00257402	0.000667816	1.74291
0.00120106	-0.0032067	0.00416072	2.04565			0.0206071	-0.0556499	0.087502	1.7745			0.00120106	-0.0032067	0.00101118	1.7745
0.00144725	-0.00389209	0.00504882	2.09659			0.0213265	-0.0576102	0.0912961	1.80607			0.00144725	-0.00389209	0.00144869	1.80607
0.00170796	-0.00462204	0.00599422	2.14634			0.022044	-0.0595591	0.0951382	1.83766			0.00170796	-0.00462204	0.00197251	1.83766
0.00198079	-0.00538943	0.00698767	2.19479			0.022759	-0.0614947	0.0990269	1.86926			0.00198079	-0.00538943	0.00257231	1.86926
0.0022637	-0.00618976	0.00802323	2.24185			0.0234712	-0.0634147	0.10296	1.90088			0.0022637	-0.00618976	0.00323784	1.90088
0.00255837	-0.00703466	0.00911702	2.28746			0.0241802	-0.0653171	0.106938	1.93248			0.00255837	-0.00703466	0.00395956	1.93248
0.00286968	-0.00793317	0.0102868	2.33159			0.0248856	-0.0671999	0.110957	1.96403			0.00286968	-0.00793317	0.00472883	1.96403
0.00320108	-0.00889303	0.0115473	2.37428			0.025587	-0.0690611	0.115016	1.99547			0.00320108	-0.00889303	0.00553808	1.99547
0.00355493	-0.00991911	0.0129091	2.4156			0.0262842	-0.070899	0.119115	2.02674			0.00355493	-0.00991911	0.00638074	2.02674
0.00393255	-0.0110137	0.0143791	2.45563			0.0269769	-0.0727115	0.123251	2.05779			0.00393255	-0.0110137	0.00725118	2.05779
0.00433446	-0.0121772	0.0159607	2.49451			0.0276647	-0.074497	0.127423	2.08857			0.00433446	-0.0121772	0.00814466	2.08857
0.00476052	-0.0134081	0.0176553	2.53236			0.0283475	-0.0762538	0.13163	2.119			0.00476052	-0.0134081	0.00905717	2.119
0.0052101	-0.0147041	0.0194619	2.56931			0.0290252	-0.0779801	0.135871	2.14905			0.0052101	-0.0147041	0.00998537	2.14905
0.00568226	-0.0160619	0.0213786	2.60549			0.0296974	-0.0796745	0.140143	2.17869			0.00568226	-0.0160619	0.0109459	2.17869
0.00617585	-0.0174778	0.0234024	2.64102			0.030364	-0.0813352	0.144446	2.20788			0.00617585	-0.0174778	0.0119615	2.20788
0.00668962	-0.0189481	0.02553	2.676			0.031025	-0.082961	0.148778	2.23661			0.00668962	-0.0189481	0.0130519	2.23661
0.00722231	-0.0204688	0.027758	2.71052			0.0316801	-0.0845504	0.153138	2.26489			0.00722231	-0.0204688	0.0142318	2.26489
0.00777266	-0.0220363	0.0300829	2.74465			0.0323294	-0.086102	0.157524	2.29271			0.00777266	-0.0220363	0.0155112	2.29271
0.00833947	-0.023647	0.0325018	2.77844			0.0329728	-0.0876146	0.161935	2.32011			0.00833947	-0.023647	0.0168961	2.32011
0.00892161	-0.0252974	0.0350117	2.81195			0.0336101	-0.089087	0.16637	2.34711			0.00892161	-0.0252974	0.0183896	2.34711
0.00951802	-0.0269845	0.0376103	2.84518			0.0342414	-0.0905181	0.170828	2.37374			0.00951802	-0.0269845	0.0199926	2.37374
0.0101277	-0.0287052	0.0402952	2.87816			0.0348667	-0.0919067	0.175307	2.40002			0.0101277	-0.0287052	0.0217042	2.40002
0.0107497	-0.0304566	0.0430648	2.91088			0.0354859	-0.0932518	0.179806	2.42601			0.0107497	-0.0304566	0.0235226	2.42601
0.0113831	-0.0322359	0.0459174	2.94334			0.036099	-0.0945525	0.184324	2.45172			0.0113831	-0.0322359	0.0254452	2.45172
0.012027	-0.0340403	0.0488515	2.97552			0.0367061	-0.0958079	0.188859	2.47719			0.012027	-0.0340403	0.0274695	2.47719
0.0126806	-0.0358671	0.0518657	3.0074			0.0373072	-0.0970171	0.193411	2.50244			0.0126806	-0.0358671	0.0295927	2.50244
0.0133431	-0.0377135	0.0549589	3.03895			0.0379023	-0.0981793	0.197978	2.52749			0.0133431	-0.0377135	0.0318123	2.52749
0.0140136	-0.0395766	0.0581298	3.07015			0.0384915	-0.0992938	0.202559	2.55236			0.0140136	-0.0395766	0.0341262	2.55236
0.0146913	-0.0414537	0.0613769	3.10096			0.0390749	-0.10036	0.207153	2.57705			0.0146913	-0.0414537	0.0365324	2.57705
0.0153755	-0.0433419	0.0646989	3.13135			0.0396524	-0.101377	0.211759	2.60156			0.0153755	-0.0433419	0.0390292	2.60156
0.0160652	-0.0452382	0.0680943	3.1613			0.0402241	-0.102344	0.216376	2.6259			0.0160652	-0.0452382	0.0416152	2.6259
0.0167599	-0.0471396	0.0715614	3.19079			0.0407902	-0.103261	0.221002	2.65005			0.0167599	-0.0471396	0.0442892	2.65005
0.0174587	-0.0490432	0.0750983	3.21978			0.0413506	-0.104128	0.225638	2.67402			0.0174587	-0.0490432	0.04705	2.67402
0.0181608	-0.0509461	0.0787031	3.24827			0.0419055	-0.104943	0.23028	2.6978			0.0181608	-0.0509461	0.0498965	2.6978
0.0188657	-0.0528453	0.0823738	3.27625			0.0424548	-0.105707	0.23493	2.72136			0.0188657	-0.0528453	0.0528276	2.72136
0.0195726	-0.0547379	0.0861082	3.30371			0.0429988	-0.106419	0.239585	2.7447			0.0195726	-0.0547379	0.0558422	2.7447
0.0202809	-0.0566211	0.0899039	3.33066			0.0435373	-0.107079	0.244246	2.76782			0.0202809	-0.0566211	0.058939	2.76782
0.0209901	-0.0584921	0.0937587	3.35709			0.0440706	-0.107687	0.248909	2.79069			0.0209901	-0.0584921	0.0621165	2.79069
0.0216996	-0.0603483	0.09767	3.38301			0.0445987	-0.108241	0.253576	2.81332			0.0216996	-0.0603483	0.0653731	2.81332
0.0224089	-0.0621872	0.101636	3.40845			0.0451216	-0.108743	0.258245	2.83569			0.0224089	-0.0621872	0.0687071	2.83569
0.0231175	-0.0640064	0.105653	3.43341			0.0456393	-0.109192	0.262915	2.85781			0.0231175	-0.0640064	0.0721165	2.85781
0.0238252	-0.0658035	0.10972	3.45792			0.0461521	-0.109587	0.267585	2.87967			0.0238252	-0.0658035	0.0755991	2.87967
0.0245315	-0.0675764	0.113833	3.48199			0.0466599	-0.10993	0.272255	2.90127			0.0245315	-0.0675764	0.0791526	2.90127
0.025236	-0.069323	0.117992	3.50563			0.0471627	-0.110219	0.276923	2.92262			0.025236	-0.069323	0.0827746	2.92262
0.0259385	-0.0710414	0.122193	3.52888			0.0476606	-0.110455	0.281588	2.94373			0.0259385	-0.0710414	0.0864626	2.94373
0.0266388	-0.0727297	0.126434	3.55175			0.0481537	-0.110638	0.286251	2.96459			0.0266388	-0.0727297	0.0902139	2.96459
0.0273365	-0.0743861	0.130713	3.57425			0.048642	-0.110768	0.290909	2.98522			0.0273365	-0.0743861	0.094026	2.98522
0.0280315	-0.0760091	0.135029	3.59641			0.0491254	-0.110845	0.295563	3.00563			0.0280315	-0.0760091	0.0978961	3.00563
0.0287237	-0.0775969	0.139379	3.61823			0.0496042	-0.110869	0.300212	3.02582			0.0287237	-0.0775969	0.101822	3.02582
0.0294127	-0.0791481	0.143761	3.63972			0.0500781	-0.11084	0.304854	3.0458			0.0294127	-0.0791481	0.1058	3.0458
0.0300985	-0.0806613	0.148174	3.66091			0.0505474	-0.110759	0.30949	3.06559			0.0300985	-0.0806613	0.109829	3.06559
0.030781	-0.082135	0.152616	3.6818			0.0510119	-0.110626	0.314117	3.08518			0.030781	-0.082135	0.113905	3.08518
0.03146	-0.0835679	0.157086	3.70239			0.0514717	-0.110441	0.318737	3.10458			0.03146	-0.0835679	0.118027	3.10458
0.0321354	-0.0849588	0.161581	3.72269			0.0519267	-0.110205	0.323347	3.1238			0.0321354	-0.0849588	0.122192	3.1238
0.0328072	-0.0863064	0.1661	3.74271			0.052377	-0.109917	0.327948	3.14284			0.0328072	-0.0863064	0.126398	3.14284
0.0334752	-0.0876096	0.170642	3.76244			0.0528225	-0.109579	0.332538	3.1617			0.0334752	-0.0876096	0.130643	3.1617
0.0341393	-0.0888672	0.175205	3.78189			0.0532632	-0.10919	0.337118	3.18039			0.0341393	-0.0888672	0.134924	3.18039
0.0347996	-0.0900782	0.179789	3.80106			0.053699	-0.108751	0.341686	3.1989			0.0347996	-0.0900782	0.139241	3.1989
0.0354559	-0.0912416	0.184391	3.81996			0.05413	-0.108263	0.346241	3.21724			0.0354559	-0.0912416	0.14359	3.21724
0.0361082	-0.0923565	0.18901	3.83857			0.054556	-0.107726	0.350784	3.2354			0.0361082	-0.0923565	0.147971	3.2354
0.0367564	-0.0934219	0.193645	3.85691			0.0549769	-0.107141	0.355313	3.25338			0.0367564	-0.0934219	0.152382	3.25338
0.0374006	-0.094437	0.198295	3.87496			0.0553928	-0.106508	0.359828	3.27119			0.0374006	-0.094437	0.15682	3.27119
0.0380407	-0.0954011	0.202958	3.89274			0.0558035	-0.105827	0.364329	3.28882			0.0380407	-0.0954011	0.161285	3.28882
0.0386767	-0.0963136	0.207633	3.91024			0.056209	-0.1051	0.368815	3.30627			0.0386767	-0.0963136	0.165775	3.30627
0.0393085	-0.0971737	0.21232	3.92747			0.0566091	-0.104327	0.373285	3.32354			0.0393085	-0.0971737	0.170289	3.32354
0.0399361	-0.0979809	0.217016	3.94442			0.0570038	-0.103508	0.377739	3.34063			0.0399361	-0.0979809	0.174824	3.34063
0.0405596	-0.0987348	0.221721	3.9611			0.0573929	-0.102644	0.382176	3.35754			0.0405596	-0.0987348	0.17938	3.35754
0.0411789	-0.0994348	0.226433	3.97751			0.0577763	-0.101736	0.386596	3.37427			0.0411789	-0.0994348	0.183956	3.37427
0.0417941	-0.100081	0.231152	3.99366			0.0581539	-0.100785	0.390999	3.39083			0.0417941	-0.100081	0.188549	3.39083
0.042405	-0.100672	0.235877	4.00954			0.0585257	-0.099791	0.395384	3.40721			0.042405	-0.100672	0.193159	3.40721
0.0430118	-0.101209	0.240605	4.02516			0.0588913	-0.0987549	0.39975	3.42342			0.0430118	-0.101209	0.197784	3.42342
0.0436143	-0.101691	0.245337	4.04053			0.0592508	-0.0976775	0.404097	3.43945			0.0436143	-0.101691	0.202424	3.43945
0.0442126	-0.102118	0.250071	4.05565			0.0596039	-0.0965596	0.408424	3.45532			0.0442126	-0.102118	0.207076	3.45532
0.0448067	-0.10249	0.254807	4.07053			0.0599505	-0.0954019	0.412732	3.47103			0.0448067	-0.10249	0.21174	3.47103
0.0453966	-0.102807	0.259542	4.08516			0.0602905	-0.0942053	0.41702	3.48657			0.0453966	-0.102807	0.216414	3.48657
0.0459821	-0.103068	0.264278	4.09956			0.0606236	-0.0929705	0.421287	3.50196			0.0459821	-0.103068	0.221097	3.50196
0.0465634	-0.103275	0.269011	4.11374			0.0609497	-0.0916982	0.425533	3.51719			0.0465634	-0.103275	0.225789	3.51719
0.0471404	-0.103427	0.273743	4.12768			0.0612687	-0.0903895	0.429757	3.53226			0.0471404	-0.103427	0.230488	3.53226
0.0477129	-0.103524	0.27847	4.14141			0.0615803	-0.089045	0.43396	3.54718			0.0477129	-0.103524	0.235192	3.54718
0.0482811	-0.103567	0.283194	4.15492			0.0618843	-0.0876656	0.438141	3.56196			0.0482811	-0.103567	0.239902	3.56196
0.0488448	-0.103556	0.287913	4.16822			0.0621806	-0.0862522	0.442299	3.57658			0.0488448	-0.103556	0.244615	3.57658
0.049404	-0.10349	0.292627	4.18131			0.062469	-0.0848056	0.446435	3.59106			0.049404	-0.10349	0.249331	3.59106
0.0499586	-0.103371	0.297333	4.1942			0.0627493	-0.0833267	0.450547	3.6054			0.0499586	-0.103371	0.254049	3.6054
0.0505085	-0.103198	0.302033	4.20689			0.0630212	-0.0818163	0.454636	3.61959			0.0505085	-0.103198	0.258768	3.61959
0.0510537	-0.102973	0.306724	4.21938			0.0632847	-0.0802754	0.458702	3.63365			0.0510537	-0.102973	0.263486	3.63365
0.0515941	-0.102694	0.311407	4.23168			0.0635394	-0.0787049	0.462743	3.64756			0.0515941	-0.102694	0.268204	3.64756
0.0521296	-0.102364	0.31608	4.24379			0.0637851	-0.0771055	0.46676	3.66133			0.0521296	-0.102364	0.27292	3.66133
0.05266	-0.101982	0.320743	4.25571			0.0640218	-0.0754783	0.470752	3.67496			0.05266	-0.101982	0.277633	3.67496
0.0531853	-0.101548	0.325395	4.26745			0.0642491	-0.0738241	0.47472	3.68846			0.0531853	-0.101548	0.282343	3.68846
0.0537054	-0.101064	0.330036	4.27901			0.0644668	-0.0721439	0.478662	3.70182			0.0537054	-0.101064	0.287048	3.70182
0.0542201	-0.100529	0.334665	4.29039			0.0646748	-0.0704385	0.482579	3.71504			0.0542201	-0.100529	0.291748	3.71504
0.0547293	-0.0999447	0.339281	4.30159			0.0648728	-0.0687089	0.486471	3.72812			0.0547293	-0.0999447	0.296442	3.72812
0.0552329	-0.0993112	0.343883	4.31262			0.0650605	-0.066956	0.490337	3.74108			0.0552329	-0.0993112	0.301129	3.74108
0.0557307	-0.0986291	0.348472	4.32348			0.0652379	-0.0651807	0.494176	3.7539			0.0557307	-0.0986291	0.305809	3.7539
0.0562226	-0.0978991	0.353046	4.33417			0.0654047	-0.0633838	0.49799	3.76658			0.0562226	-0.0978991	0.31048	3.76658
0.0567084	-0.0971218	0.357605	4.34468			0.0655606	-0.0615665	0.501777	3.77914			0.0567084	-0.0971218	0.315143	3.77914
0.057188	-0.0962979	0.362149	4.35504			0.0657056	-0.0597295	0.505537	3.79157			0.057188	-0.0962979	0.319796	3.79157
0.0576611	-0.0954281	0.366676	4.36523			0.0658392	-0.0578738	0.509271	3.80387			0.0576611	-0.0954281	0.324438	3.80387
0.0581277	-0.0945131	0.371187	4.37526			0.0659615	-0.0560003	0.512977	3.81604			0.0581277	-0.0945131	0.32907	3.81604
0.0585875	-0.0935536	0.37568	4.38513			0.0660721	-0.0541099	0.516656	3.82809			0.0585875	-0.0935536	0.33369	3.82809
0.0590403	-0.0925504	0.380156	4.39485			0.0661708	-0.0522036	0.520308	3.84002			0.0590403	-0.0925504	0.338298	3.84002
0.0594859	-0.0915043	0.384614	4.40441			0.0662575	-0.0502822	0.523932	3.85182			0.0594859	-0.0915043	0.342893	3.85182
0.0599242	-0.090416	0.389053	4.41382			0.066332	-0.0483467	0.527529	3.8635			0.0599242	-0.090416	0.347474	3.8635
0.060355	-0.0892863	0.393473	4.42308			0.0663941	-0.046398	0.531097	3.87507			0.060355	-0.0892863	0.352042	3.87507
0.060778	-0.0881161	0.397873	4.43219			0.0664435	-0.044437	0.534638	3.88651			0.060778	-0.0881161	0.356595	3.88651
0.0611931	-0.0869062	0.402254	4.44116			0.0664802	-0.0424646	0.53815	3.89784			0.0611931	-0.0869062	0.361132	3.89784
0.0615999	-0.0856574	0.406614	4.44999			0.0665038	-0.0404817	0.541635	3.90906			0.0615999	-0.0856574	0.365654	3.90906
0.0619984	-0.0843706	0.410954	4.45868			0.0665144	-0.0384892	0.545091	3.92016			0.0619984	-0.0843706	0.37016	3.92016
0.0623883	-0.0830467	0.415272	4.46723			0.0665116	-0.036488	0.548518	3.93115			0.0623883	-0.0830467	0.374649	3.93115
0.0627693	-0.0816865	0.419569	4.47564			0.0664954	-0.034479	0.551917	3.94203			0.0627693	-0.0816865	0.379121	3.94203
0.0631413	-0.0802909	0.423844	4.48392			0.0664656	-0.032463	0.555287	3.9528			0.0631413	-0.0802909	0.383576	3.9528
0.063504	-0.0788609	0.428097	4.49207			0.0664219	-0.030441	0.558629	3.96345			0.063504	-0.0788609	0.388012	3.96345
0.0638571	-0.0773974	0.432327	4.5001			0.0663644	-0.0284138	0.561942	3.974			0.0638571	-0.0773974	0.392429	3.974
0.0642005	-0.0759012	0.436534	4.50799			0.0662928	-0.0263822	0.565225	3.98445			0.0642005	-0.0759012	0.396828	3.98445
0.064534	-0.0743733	0.440718	4.51576			0.066207	-0.0243471	0.56848	3.99478			0.064534	-0.0743733	0.401207	3.99478
0.0648572	-0.0728146	0.444879	4.52341			0.0661069	-0.0223095	0.571706	4.00502			0.0648572	-0.0728146	0.405566	4.00502
0.0651699	-0.071226	0.449015	4.53094			0.0659923	-0.02027	0.574902	4.01514			0.0651699	-0.071226	0.409905	4.01514
0.065472	-0.0696085	0.453128	4.53834			0.0658632	-0.0182296	0.57807	4.02517			0.065472	-0.0696085	0.414223	4.02517
0.0657632	-0.0679631	0.457216	4.54564			0.0657195	-0.0161891	0.581208	4.03509			0.0657632	-0.0679631	0.41852	4.03509
0.0660432	-0.0662906	0.461279	4.55281			0.065561	-0.0141492	0.584317	4.04491			0.0660432	-0.0662906	0.422795	4.04491
0.0663119	-0.0645921	0.465317	4.55988			0.0653877	-0.0121109	0.587396	4.05463			0.0663119	-0.0645921	0.427049	4.05463
0.0665689	-0.0628684	0.46933	4.56683			0.0651995	-0.0100749	0.590447	4.06425			0.0665689	-0.0628684	0.431281	4.06425
0.0668141	-0.0611206	0.473318	4.57367			0.0649963	-0.00804191	0.593468	4.07377			0.0668141	-0.0611206	0.43549	4.07377
0.0670472	-0.0593496	0.47728	4.58041			0.064778	-0.00601284	0.59646	4.0832			0.0670472	-0.0593496	0.439676	4.0832
0.067268	-0.0575563	0.481216	4.58704			0.0645446	-0.00398842	0.599422	4.09253			0.067268	-0.0575563	0.443839	4.09253
0.0674763	-0.0557418	0.485125	4.59356			0.0642961	-0.00196942	0.602355	4.10176			0.0674763	-0.0557418	0.447979	4.10176
0.0676719	-0.0539069	0.489008	4.59998			0.0640324	4.34194e-05	0.605259	4.1109			0.0676719	-0.0539069	0.452095	4.1109
0.0678545	-0.0520526	0.492865	4.6063			0.0637534	0.00204935	0.608133	4.11995			0.0678545	-0.0520526	0.456186	4.11995
0.0680239	-0.05018	0.496695	4.61253			0.0634592	0.00404764	0.610978	4.1289			0.0680239	-0.05018	0.460254	4.1289
0.0681799	-0.0482898	0.500497	4.61865			0.0631497	0.00603756	0.613794	4.13777			0.0681799	-0.0482898	0.464297	4.13777
0.0683224	-0.0463832	0.504273	4.62467			0.062825	0.00801841	0.616581	4.14654			0.0683224	-0.0463832	0.468314	4.14654
0.068451	-0.044461	0.508021	4.6306			0.062485	0.00998949	0.619338	4.15522			0.068451	-0.044461	0.472307	4.15522
0.0685657	-0.0425243	0.511741	4.63644			0.0621298	0.0119501	0.622066	4.16382			0.0685657	-0.0425243	0.476275	4.16382
0.0686661	-0.0405738	0.515434	4.64219			0.0617593	0.0138996	0.624765	4.17233			0.0686661	-0.0405738	0.480216	4.17233
0.0687522	-0.0386107	0.519098	4.64784			0.0613737	0.0158372	0.627435	4.18075			0.0687522	-0.0386107	0.484132	4.18075
0.0688237	-0.0366358	0.522735	4.6534			0.0609728	0.0177624	0.630076	4.18909			0.0688237	-0.0366358	0.488022	4.18909
0.0688805	-0.0346501	0.526343	4.65888			0.0605569	0.0196745	0.632688	4.19734			0.0688805	-0.0346501	0.491885	4.19734
0.0689224	-0.0326544	0.529923	4.66427			0.060126	0.0215729	0.635271	4.2055			0.0689224	-0.0326544	0.495722	4.2055
0.0689492	-0.0306498	0.533475	4.66957			0.05968	0.0234569	0.637826	4.21359			0.0689492	-0.0306498	0.499532	4.21359
0.0689608	-0.0286371	0.536998	4.6748			0.0592192	0.0253259	0.640352	4.22159			0.0689608	-0.0286371	0.503315	4.22159
0.068957	-0.0266173	0.540492	4.67993			0.0587436	0.0271794	0.642849	4.22951			0.068957	-0.0266173	0.507071	4.22951
0.0689377	-0.0245912	0.543958	4.68499			0.0582532	0.0290168	0.645317	4.23735			0.0689377	-0.0245912	0.510799	4.23735
0.0689027	-0.0225598	0.547395	4.68997			0.0577483	0.0308375	0.647757	4.24511			0.0689027	-0.0225598	0.5145	4.24511
0.0688519	-0.0205239	0.550802	4.69487			0.0572288	0.0326409	0.650169	4.2528			0.0688519	-0.0205239	0.518174	4.2528
0.0687852	-0.0184845	0.554181	4.69969			0.056695	0.0344265	0.652553	4.2604			0.0687852	-0.0184845	0.52182	4.2604
0.0687025	-0.0164424	0.55753	4.70443			0.0561469	0.0361937	0.654908	4.26793			0.0687025	-0.0164424	0.525437	4.26793
0.0686036	-0.0143985	0.56085	4.7091			0.0555847	0.0379422	0.657236	4.27538			0.0686036	-0.0143985	0.529027	4.27538
0.0684885	-0.0123536	0.564141	4.7137			0.0550086	0.0396712	0.659535	4.28275			0.0684885	-0.0123536	0.532588	4.28275
0.068357	-0.0103086	0.567402	4.71822			0.0544186	0.0413805	0.661807	4.29005			0.068357	-0.0103086	0.536122	4.29005
0.0682091	-0.00826433	0.570634	4.72267			0.0538151	0.0430694	0.664052	4.29728			0.0682091	-0.00826433	0.539626	4.29728
0.0680448	-0.00622166	0.573837	4.72706			0.053198	0.0447375	0.666269	4.30443			0.0680448	-0.00622166	0.543102	4.30443
0.0678639	-0.00418139	0.57701	4.73137			0.0525677	0.0463844	0.668458	4.31151			0.0678639	-0.00418139	0.54655	4.31151
0.0676663	-0.00214434	0.580153	4.73562			0.0519244	0.0480097	0.670621	4.31851			0.0676663	-0.00214434	0.549968	4.31851
0.0674522	-0.000111313	0.583267	4.73979			0.0512681	0.0496128	0.672756	4.32545			0.0674522	-0.000111313	0.553358	4.32545
0.0672213	0.00191689	0.586351	4.74391			0.0505992	0.0511935	0.674865	4.33231			0.0672213	0.00191689	0.556718	4.33231
0.0669737	0.00393949	0.589406	4.74795			0.0499178	0.0527512	0.676947	4.33911			0.0669737	0.00393949	0.56005	4.33911
0.0667093	0.0059557	0.592431	4.75194			0.0492241	0.0542857	0.679002	4.34584			0.0667093	0.0059557	0.563352	4.34584
0.0664282	0.00796477	0.595426	4.75586			0.0485184	0.0557965	0.681031	4.3525			0.0664282	0.00796477	0.566626	4.3525
0.0661303	0.00996594	0.598392	4.75972			0.047801	0.0572834	0.683034	4.35909			0.0661303	0.00996594	0.56987	4.35909
0.0658156	0.0119585	0.601328	4.76352			0.047072	0.0587459	0.685011	4.36561			0.0658156	0.0119585	0.573085	4.36561
0.0654843	0.0139416	0.604235	4.76726			0.0463318	0.0601837	0.686962	4.37207			0.0654843	0.0139416	0.57627	4.37207
0.0651362	0.0159147	0.607112	4.77094			0.0455805	0.0615966	0.688888	4.37846			0.0651362	0.0159147	0.579426	4.37846
0.0647714	0.017877	0.609959	4.77456			0.0448185	0.0629841	0.690788	4.38479			0.0647714	0.017877	0.582553	4.38479
0.06439	0.0198277	0.612777	4.77812			0.0440459	0.0643462	0.692663	4.39105			0.06439	0.0198277	0.58565	4.39105
0.063992	0.0217663	0.615566	4.78163			0.0432632	0.0656823	0.694513	4.39725			0.063992	0.0217663	0.588717	4.39725
0.0635775	0.0236921	0.618325	4.78509			0.0424705	0.0669924	0.696338	4.40339			0.0635775	0.0236921	0.591755	4.40339
0.0631465	0.0256043	0.621055	4.78849			0.0416681	0.0682761	0.698138	4.40947			0.0631465	0.0256043	0.594764	4.40947
0.0626992	0.0275024	0.623755	4.79183			0.0408564	0.0695333	0.699914	4.41548			0.0626992	0.0275024	0.597743	4.41548
0.0622357	0.0293857	0.626426	4.79513			0.0400356	0.0707637	0.701666	4.42143			0.0622357	0.0293857	0.600693	4.42143
0.0617559	0.0312536	0.629068	4.79837			0.0392061	0.0719671	0.703393	4.42732			0.0617559	0.0312536	0.603613	4.42732
0.0612602	0.0331055	0.631681	4.80156			0.0383681	0.0731433	0.705097	4.43316			0.0612602	0.0331055	0.606504	4.43316
0.0607485	0.0349408	0.634265	4.8047			0.037522	0.0742921	0.706778	4.43893			0.0607485	0.0349408	0.609365	4.43893
0.060221	0.036759	0.63682	4.8078			0.036668	0.0754134	0.708435	4.44465			0.060221	0.036759	0.612197	4.44465
0.0596778	0.0385593	0.639347	4.81084			0.0358066	0.0765071	0.710069	4.4503			0.0596778	0.0385593	0.615	4.4503
0.0591191	0.0403414	0.641844	4.81383			0.0349379	0.0775729	0.711679	4.4559			0.0591191	0.0403414	0.617773	4.4559
0.0585451	0.0421046	0.644313	4.81678			0.0340624	0.0786108	0.713268	4.46144			0.0585451	0.0421046	0.620517	4.46144
0.0579559	0.0438485	0.646754	4.81969			0.0331803	0.0796206	0.714833	4.46693			0.0579559	0.0438485	0.623232	4.46693
0.0573517	0.0455725	0.649166	4.82254			0.0322921	0.0806023	0.716377	4.47236			0.0573517	0.0455725	0.625917	4.47236
0.0567327	0.0472761	0.65155	4.82535			0.0313979	0.0815558	0.717898	4.47774			0.0567327	0.0472761	0.628574	4.47774
0.056099	0.0489588	0.653905	4.82812			0.0304983	0.0824809	0.719398	4.48306			0.056099	0.0489588	0.631201	4.48306
0.055451	0.0506202	0.656233	4.83085			0.0295934	0.0833777	0.720876	4.48833			0.055451	0.0506202	0.6338	4.48833
0.0547887	0.0522598	0.658533	4.83353			0.0286837	0.0842461	0.722333	4.49354			0.0547887	0.0522598	0.63637	4.49354
0.0541124	0.0538772	0.660805	4.83617			0.0277695	0.085086	0.723768	4.4987			0.0541124	0.0538772	0.638911	4.4987
0.0534223	0.0554719	0.66305	4.83877			0.0268512	0.0858975	0.725183	4.50381			0.0534223	0.0554719	0.641423	4.50381
0.0527187	0.0570435	0.665267	4.84133			0.025929	0.0866804	0.726577	4.50887			0.0527187	0.0570435	0.643907	4.50887
0.0520018	0.0585917	0.667457	4.84384			0.0250034	0.0874349	0.727951	4.51388			0.0520018	0.0585917	0.646362	4.51388
0.0512719	0.060116	0.66962	4.84632			0.0240746	0.0881609	0.729305	4.51883			0.0512719	0.060116	0.648789	4.51883
0.0505292	0.061616	0.671756	4.84876			0.023143	0.0888585	0.730638	4.52374			0.0505292	0.061616	0.651188	4.52374
0.0497739	0.0630915	0.673865	4.85116			0.0222091	0.0895276	0.731952	4.5286			0.0497739	0.0630915	0.653558	4.5286
0.0490065	0.064542	0.675948	4.85353			0.021273	0.0901684	0.733246	4.5334			0.0490065	0.064542	0.655901	4.5334
0.048227	0.0659673	0.678005	4.85586			0.0203352	0.0907809	0.734522	4.53816			0.048227	0.0659673	0.658215	4.53816
0.0474358	0.067367	0.680035	4.85815			0.019396	0.0913651	0.735778	4.54287			0.0474358	0.067367	0.660503	4.54287
0.0466333	0.0687408	0.682039	4.8604			0.0184558	0.0919212	0.737015	4.54753			0.0466333	0.0687408	0.662762	4.54753
0.0458196	0.0700885	0.684017	4.86262			0.0175149	0.0924492	0.738234	4.55215			0.0458196	0.0700885	0.664994	4.55215
0.0449952	0.0714097	0.68597	4.86481			0.0165736	0.0929493	0.739434	4.55672			0.0449952	0.0714097	0.667199	4.55672
0.0441603	0.0727042	0.687897	4.86696			0.0156323	0.0934215	0.740616	4.56124			0.0441603	0.0727042	0.669377	4.56124
0.0433151	0.0739718	0.689799	4.86908			0.0146914	0.0938659	0.741781	4.56571			0.0433151	0.0739718	0.671528	4.56571
0.0424602	0.0752122	0.691676	4.87116			0.0137511	0.0942828	0.742928	4.57014			0.0424602	0.0752122	0.673652	4.57014
0.0415957	0.0764253	0.693528	4.87321			0.0128118	0.0946722	0.744057	4.57453			0.0415957	0.0764253	0.675749	4.57453
0.040722	0.0776107	0.695355	4.87523			0.0118738	0.0950343	0.745169	4.57887			0.040722	0.0776107	0.67782	4.57887
0.0398394	0.0787684	0.697159	4.87722			0.0109376	0.0953692	0.746264	4.58317			0.0398394	0.0787684	0.679865	4.58317
0.0389483	0.0798981	0.698937	4.87918			0.0100033	0.0956772	0.747343	4.58742			0.0389483	0.0798981	0.681883	4.58742
0.038049	0.0809997	0.700692	4.8811			0.00907132	0.0959583	0.748404	4.59163			0.038049	0.0809997	0.683876	4.59163
0.0371419	0.0820731	0.702424	4.883			0.00814201	0.0962129	0.74945	4.5958			0.0371419	0.0820731	0.685843	4.5958
0.0362272	0.083118	0.704131	4.88487			0.00721567	0.096441	0.750479	4.59993			0.0362272	0.083118	0.687785	4.59993
0.0353054	0.0841345	0.705816	4.8867			0.00629261	0.096643	0.751493	4.60401			0.0353054	0.0841345	0.689701	4.60401
0.0343769	0.0851223	0.707477	4.88851			0.00537315	0.0968189	0.75249	4.60806			0.0343769	0.0851223	0.691592	4.60806
0.0334419	0.0860815	0.709115	4.89029			0.0044576	0.0969691	0.753473	4.61206			0.0334419	0.0860815	0.693458	4.61206
0.0325008	0.0870118	0.710731	4.89205			0.00354626	0.0970937	0.75444	4.61602			0.0325008	0.0870118	0.6953	4.61602
0.031554	0.0879133	0.712324	4.89377			0.00263943	0.097193	0.755391	4.61994			0.031554	0.0879133	0.697117	4.61994
0.0306018	0.0887858	0.713896	4.89547			0.00173741	0.0972672	0.756328	4.62382			0.0306018	0.0887858	0.69891	4.62382
0.0296447	0.0896295	0.715445	4.89714			0.000840496	0.0973166	0.75725	4.62766			0.0296447	0.0896295	0.700678	4.62766
0.0286829	0.0904441	0.716972	4.89879			-5.10281e-05	0.0973415	0.758158	4.63147			0.0286829	0.0904441	0.702423	4.63147
0.0277169	0.0912297	0.718478	4.90041			-0.000936878	0.097342	0.759052	4.63523			0.0277169	0.0912297	0.704144	4.63523
0.0267471	0.0919864	0.719963	4.90201			-0.00181677	0.0973186	0.759931	4.63896			0.0267471	0.0919864	0.705842	4.63896
0.0257737	0.092714	0.721427	4.90358			-0.00269044	0.0972714	0.760796	4.64264			0.0257737	0.092714	0.707517	4.64264
0.0247971	0.0934127	0.72287	4.90512			-0.00355761	0.0972007	0.761648	4.6463			0.0247971	0.0934127	0.709168	4.6463
0.0238178	0.0940824	0.724292	4.90664			-0.00441802	0.0971069	0.762486	4.64991			0.0238178	0.0940824	0.710797	4.64991
0.0228361	0.0947232	0.725695	4.90814			-0.00527141	0.0969902	0.763311	4.65349			0.0228361	0.0947232	0.712403	4.65349
0.0218523	0.0953352	0.727077	4.90961			-0.00611753	0.0968509	0.764122	4.65703			0.0218523	0.0953352	0.713987	4.65703
0.0208669	0.0959184	0.728439	4.91107			-0.00695612	0.0966893	0.76492	4.66053			0.0208669	0.0959184	0.715549	4.66053
0.0198801	0.0964729	0.729781	4.91249			-0.00778695	0.0965058	0.765706	4.664			0.0198801	0.0964729	0.717089	4.664
0.0188924	0.0969988	0.731105	4.9139			-0.00860977	0.0963007	0.766479	4.66744			0.0188924	0.0969988	0.718608	4.66744
0.0179042	0.0974962	0.732409	4.91528			-0.00942436	0.0960742	0.767239	4.67084			0.0179042	0.0974962	0.720105	4.67084
0.0169157	0.0979651	0.733694	4.91665			-0.0102305	0.0958268	0.767987	4.6742			0.0169157	0.0979651	0.721581	4.6742
0.0159274	0.0984059	0.73496	4.91799			-0.0110279	0.0955586	0.768723	4.67753			0.0159274	0.0984059	0.723036	4.67753
0.0149396	0.0988184	0.736208	4.91931			-0.0118165	0.0952702	0.769446	4.68083			0.0149396	0.0988184	0.72447	4.68083
0.0139527	0.099203	0.737438	4.92061			-0.0125959	0.0949617	0.770158	4.68409			0.0139527	0.099203	0.725884	4.68409
0.012967	0.0995597	0.738649	4.92189			-0.0133661	0.0946336	0.770858	4.68732			0.012967	0.0995597	0.727277	4.68732
0.0119829	0.0998887	0.739843	4.92314			-0.0141267	0.0942862	0.771547	4.69052			0.0119829	0.0998887	0.72865	4.69052
0.0110006	0.10019	0.74102	4.92438			-0.0148776	0.0939199	0.772224	4.69368			0.0110006	0.10019	0.730004	4.69368
0.0100207	0.100464	0.742178	4.9256			-0.0156187	0.0935349	0.772889	4.69682			0.0100207	0.100464	0.731338	4.69682
0.00904334	0.100711	0.74332	4.9268			-0.0163497	0.0931317	0.773544	4.69992			0.00904334	0.100711	0.732653	4.69992
0.00806895	0.100931	0.744445	4.92798			-0.0170705	0.0927106	0.774188	4.70298			0.00806895	0.100931	0.733949	4.70298
0.00709783	0.101125	0.745553	4.92915			-0.0177808	0.0922719	0.77482	4.70602			0.00709783	0.101125	0.735226	4.70602
0.00613033	0.101291	0.746645	4.93029			-0.0184806	0.0918161	0.775442	4.70903			0.00613033	0.101291	0.736484	4.70903
0.00516677	0.101432	0.74772	4.93142			-0.0191697	0.0913434	0.776053	4.71201			0.00516677	0.101432	0.737723	4.71201
0.00420748	0.101546	0.748779	4.93253			-0.0198479	0.0908543	0.776654	4.71495			0.00420748	0.101546	0.738945	4.71495
0.00325276	0.101635	0.749823	4.93362			-0.0205151	0.0903491	0.777245	4.71787			0.00325276	0.101635	0.740148	4.71787
0.00230295	0.101698	0.75085	4.93469			-0.0211712	0.0898282	0.777825	4.72075			0.00230295	0.101698	0.741334	4.72075
0.00135834	0.101735	0.751863	4.93575			-0.021816	0.0892919	0.778395	4.72361			0.00135834	0.101735	0.742502	4.72361
0.000419244	0.101748	0.75286	4.93679			-0.0224494	0.0887407	0.778955	4.72644			0.000419244	0.101748	0.743653	4.72644
-0.000514039	0.101736	0.753841	4.93782			-0.0230712	0.0881749	0.779505	4.72924			-0.000514039	0.101736	0.744787	4.72924
-0.00144122	0.101699	0.754808	4.93882			-0.0236815	0.0875948	0.780046	4.73201			-0.00144122	0.101699	0.745904	4.73201
-0.00236199	0.101638	0.755761	4.93982			-0.02428	0.0870009	0.780577	4.73475			-0.00236199	0.101638	0.747004	4.73475
-0.00327609	0.101553	0.756698	4.94079			-0.0248666	0.0863934	0.781098	4.73746			-0.00327609	0.101553	0.748088	4.73746
-0.00418322	0.101444	0.757622	4.94175			-0.0254413	0.0857729	0.78161	4.74015			-0.00418322	0.101444	0.749155	4.74015
-0.00508312	0.101312	0.758531	4.9427			-0.0260041	0.0851396	0.782112	4.74281			-0.00508312	0.101312	0.750206	4.74281
-0.00597551	0.101157	0.759427	4.94363			-0.0265547	0.0844939	0.782606	4.74544			-0.00597551	0.101157	0.751242	4.74544
-0.00686014	0.100979	0.760308	4.94455			-0.0270931	0.0838363	0.78309	4.74805			-0.00686014	0.100979	0.752261	4.74805
-0.00773674	0.100779	0.761176	4.94545			-0.0276193	0.083167	0.783565	4.75062			-0.00773674	0.100779	0.753266	4.75062
-0.00860506	0.100557	0.762031	4.94634			-0.0281331	0.0824865	0.784031	4.75318			-0.00860506	0.100557	0.754255	4.75318
-0.00946486	0.100313	0.762872	4.94721			-0.0286346	0.0817951	0.784489	4.7557			-0.00946486	0.100313	0.755229	4.7557
-0.0103159	0.100047	0.7637	4.94807			-0.0291237	0.0810932	0.784937	4.7582			-0.0103159	0.100047	0.756188	4.7582
-0.0111579	0.0997606	0.764515	4.94891			-0.0296003	0.0803811	0.785378	4.76068			-0.0111579	0.0997606	0.757132	4.76068
-0.0119908	0.0994532	0.765317	4.94975			-0.0300644	0.0796593	0.785809	4.76313			-0.0119908	0.0994532	0.758062	4.76313
-0.0128141	0.0991253	0.766107	4.95056			-0.0305159	0.078928	0.786232	4.76555			-0.0128141	0.0991253	0.758978	4.76555
-0.0136279	0.0987774	0.766885	4.95137			-0.0309549	0.0781878	0.786647	4.76795			-0.0136279	0.0987774	0.759879	4.76795
-0.0144317	0.0984098	0.76765	4.95216			-0.0313812	0.0774388	0.787054	4.77033			-0.0144317	0.0984098	0.760766	4.77033
-0.0152255	0.0980228	0.768402	4.95294			-0.0317949	0.0766815	0.787452	4.77268			-0.0152255	0.0980228	0.76164	4.77268
-0.016009	0.0976168	0.769143	4.95371			-0.032196	0.0759163	0.787842	4.775			-0.016009	0.0976168	0.7625	4.775
-0.0167821	0.0971921	0.769872	4.95447			-0.0325844	0.0751435	0.788225	4.77731			-0.0167821	0.0971921	0.763346	4.77731
-0.0175445	0.0967491	0.770589	4.95521			-0.0329602	0.0743634	0.788599	4.77958			-0.0175445	0.0967491	0.76418	4.77958
-0.0182961	0.0962883	0.771295	4.95594			-0.0333233	0.0735765	0.788966	4.78184			-0.0182961	0.0962883	0.765	4.78184
-0.0190367	0.0958098	0.771989	4.95666			-0.0336738	0.072783	0.789324	4.78407			-0.0190367	0.0958098	0.765807	4.78407
-0.0197661	0.0953142	0.772672	4.95737			-0.0340116	0.0719833	0.789676	4.78628			-0.0197661	0.0953142	0.766601	4.78628
-0.0204843	0.0948018	0.773344	4.95807			-0.0343368	0.0711778	0.790019	4.78847			-0.0204843	0.0948018	0.767383	4.78847
-0.021191	0.0942729	0.774004	4.95875			-0.0346494	0.0703668	0.790355	4.79064			-0.021191	0.0942729	0.768152	4.79064
-0.021886	0.093728	0.774654	4.95943			-0.0349495	0.0695506	0.790684	4.79278			-0.021886	0.093728	0.768909	4.79278
-0.0225694	0.0931674	0.775293	4.96009			-0.035237	0.0687296	0.791005	4.7949			-0.0225694	0.0931674	0.769654	4.7949
-0.0232408	0.0925915	0.775921	4.96075			-0.035512	0.0679042	0.791319	4.797			-0.0232408	0.0925915	0.770386	4.797
-0.0239002	0.0920006	0.776538	4.96139			-0.0357745	0.0670746	0.791626	4.79908			-0.0239002	0.0920006	0.771107	4.79908
-0.0245475	0.0913953	0.777146	4.96202			-0.0360246	0.0662411	0.791925	4.80113			-0.0245475	0.0913953	0.771816	4.80113
-0.0251826	0.0907757	0.777742	4.96264			-0.0362624	0.0654042	0.792218	4.80317			-0.0251826	0.0907757	0.772513	4.80317
-0.0258053	0.0901424	0.778329	4.96325			-0.0364878	0.0645641	0.792503	4.80518			-0.0258053	0.0901424	0.773199	4.80518
-0.0264156	0.0894956	0.778905	4.96386			-0.036701	0.0637211	0.792782	4.80718			-0.0264156	0.0894956	0.773874	4.80718
-0.0270133	0.0888359	0.779472	4.96445			-0.036902	0.0628756	0.793054	4.80915			-0.0270133	0.0888359	0.774537	4.80915
-0.0275984	0.0881634	0.780028	4.96503			-0.0370908	0.0620279	0.793319	4.8111			-0.0275984	0.0881634	0.775189	4.8111
-0.0281708	0.0874788	0.780575	4.96561			-0.0372676	0.0611782	0.793577	4.81304			-0.0281708	0.0874788	0.77583	4.81304
-0.0287304	0.0867822	0.781112	4.96617			-0.0374324	0.060327	0.793828	4.81495			-0.0287304	0.0867822	0.776461	4.81495
-0.0292771	0.0860742	0.78164	4.96673			-0.0375854	0.0594744	0.794074	4.81684			-0.0292771	0.0860742	0.777081	4.81684
-0.0298109	0.085355	0.782158	4.96727			-0.0377264	0.0586208	0.794312	4.81872			-0.0298109	0.085355	0.77769	4.81872
-0.0303317	0.0846251	0.782666	4.96781			-0.0378558	0.0577664	0.794544	4.82057			-0.0303317	0.0846251	0.778288	4.82057
-0.0308395	0.0838848	0.783166	4.96834			-0.0379735	0.0569117	0.79477	4.82241			-0.0308395	0.0838848	0.778877	4.82241
-0.0313342	0.0831345	0.783656	4.96886			-0.0380796	0.0560567	0.79499	4.82423			-0.0313342	0.0831345	0.779455	4.82423
-0.0318157	0.0823747	0.784137	4.96937			-0.0381743	0.0552019	0.795203	4.82602			-0.0318157	0.0823747	0.780022	4.82602
-0.0322842	0.0816055	0.784609	4.96987			-0.0382576	0.0543475	0.79541	4.8278			-0.0322842	0.0816055	0.78058	4.8278
-0.0327394	0.0808275	0.785072	4.97037			-0.0383297	0.0534937	0.795611	4.82957			-0.0327394	0.0808275	0.781128	4.82957
-0.0331814	0.080041	0.785526	4.97085			-0.0383907	0.0526409	0.795807	4.83131			-0.0331814	0.080041	0.781666	4.83131
-0.0336102	0.0792464	0.785972	4.97133			-0.0384405	0.0517893	0.795996	4.83303			-0.0336102	0.0792464	0.782195	4.83303
-0.0340258	0.078444	0.786408	4.9718			-0.0384795	0.0509391	0.796179	4.83474			-0.0340258	0.078444	0.782714	4.83474
-0.0344281	0.0776342	0.786837	4.97227			-0.0385077	0.0500907	0.796356	4.83643			-0.0344281	0.0776342	0.783223	4.83643
-0.0348172	0.0768174	0.787256	4.97272			-0.0385251	0.0492442	0.796528	4.83811			-0.0348172	0.0768174	0.783723	4.83811
-0.035193	0.0759939	0.787668	4.97317			-0.038532	0.0483999	0.796694	4.83976			-0.035193	0.0759939	0.784214	4.83976
-0.0355556	0.075164	0.788071	4.97361			-0.0385285	0.0475581	0.796855	4.8414			-0.0355556	0.075164	0.784695	4.8414
-0.035905	0.0743282	0.788466	4.97405			-0.0385146	0.0467189	0.79701	4.84302			-0.035905	0.0743282	0.785167	4.84302
-0.0362412	0.0734868	0.788852	4.97447			-0.0384906	0.0458826	0.797159	4.84463			-0.0362412	0.0734868	0.78563	4.84463
-0.0365642	0.0726401	0.789231	4.97489			-0.0384565	0.0450495	0.797303	4.84622			-0.0365642	0.0726401	0.786085	4.84622
-0.0368741	0.0717884	0.789601	4.9753			-0.0384125	0.0442197	0.797442	4.84779			-0.0368741	0.0717884	0.78653	4.84779
-0.0371709	0.0709322	0.789964	4.97571			-0.0383586	0.0433935	0.797576	4.84935			-0.0371709	0.0709322	0.786967	4.84935
-0.0374546	0.0700718	0.790319	4.97611			-0.0382952	0.0425711	0.797704	4.85089			-0.0374546	0.0700718	0.787395	4.85089
-0.0377253	0.0692074	0.790666	4.9765			-0.0382222	0.0417527	0.797827	4.85241			-0.0377253	0.0692074	0.787815	4.85241
-0.037983	0.0683395	0.791005	4.97689			-0.0381399	0.0409384	0.797945	4.85392			-0.037983	0.0683395	0.788226	4.85392
-0.0382278	0.0674683	0.791337	4.97727			-0.0380483	0.0401286	0.798058	4.85541			-0.0382278	0.0674683	0.788628	4.85541
-0.0384597	0.0665942	0.791661	4.97764			-0.0379477	0.0393233	0.798166	4.85689			-0.0384597	0.0665942	0.789022	4.85689
-0.0386789	0.0657175	0.791977	4.97801			-0.0378381	0.0385229	0.79827	4.85836			-0.0386789	0.0657175	0.789408	4.85836
-0.0388853	0.0648385	0.792287	4.97837			-0.0377198	0.0377273	0.798368	4.8598			-0.0388853	0.0648385	0.789786	4.8598
-0.039079	0.0639576	0.792589	4.97873			-0.0375928	0.0369369	0.798462	4.86124			-0.039079	0.0639576	0.790156	4.86124
-0.0392602	0.063075	0.792883	4.97908			-0.0374574	0.0361518	0.798551	4.86265			-0.0392602	0.063075	0.790518	4.86265
-0.0394289	0.062191	0.793171	4.97942			-0.0373136	0.0353722	0.798636	4.86406			-0.0394289	0.062191	0.790872	4.86406
-0.0395852	0.0613061	0.793451	4.97976			-0.0371617	0.0345982	0.798716	4.86545			-0.0395852	0.0613061	0.791218	4.86545
-0.0397291	0.0604203	0.793724	4.98009			-0.0370018	0.03383	0.798791	4.86682			-0.0397291	0.0604203	0.791556	4.86682
-0.0398608	0.0595341	0.793991	4.98042			-0.036834	0.0330677	0.798862	4.86818			-0.0398608	0.0595341	0.791887	4.86818
-0.0399803	0.0586478	0.79425	4.98074			-0.0366586	0.0323116	0.798929	4.86953			-0.0399803	0.0586478	0.79221	4.86953
-0.0400878	0.0577616	0.794503	4.98106			-0.0364756	0.0315617	0.798992	4.87086			-0.0400878	0.0577616	0.792525	4.87086
-0.0401834	0.0568757	0.794749	4.98137			-0.0362852	0.0308182	0.79905	4.87218			-0.0401834	0.0568757	0.792833	4.87218
-0.0402671	0.0559906	0.794988	4.98167			-0.0360877	0.0300812	0.799104	4.87349			-0.0402671	0.0559906	0.793134	4.87349
-0.0403391	0.0551064	0.795221	4.98198			-0.035883	0.0293508	0.799154	4.87478			-0.0403391	0.0551064	0.793427	4.87478
-0.0403995	0.0542235	0.795447	4.98227			-0.0356715	0.0286273	0.799201	4.87606			-0.0403995	0.0542235	0.793713	4.87606
-0.0404484	0.053342	0.795666	4.98256			-0.0354533	0.0279106	0.799243	4.87733			-0.0404484	0.053342	0.793992	4.87733
-0.0404859	0.0524623	0.79588	4.98285			-0.0352286	0.0272009	0.799281	4.87858			-0.0404859	0.0524623	0.794264	4.87858
-0.0405122	0.0515846	0.796086	4.98313			-0.0349974	0.0264984	0.799316	4.87982			-0.0405122	0.0515846	0.794529	4.87982
-0.0405273	0.0507091	0.796287	4.98341			-0.03476	0.0258031	0.799347	4.88105			-0.0405273	0.0507091	0.794787	4.88105
-0.0405314	0.0498362	0.796481	4.98368			-0.0345166	0.0251151	0.799374	4.88226			-0.0405314	0.0498362	0.795038	4.88226
-0.0405247	0.0489659	0.79667	4.98395			-0.0342672	0.0244346	0.799398	4.88346			-0.0405247	0.0489659	0.795282	4.88346
-0.0405072	0.0480987	0.796852	4.98421			-0.0340121	0.0237616	0.799418	4.88465			-0.0405072	0.0480987	0.79552	4.88465
-0.0404791	0.0472347	0.797028	4.98447			-0.0337515	0.0230962	0.799435	4.88583			-0.0404791	0.0472347	0.795751	4.88583
-0.0404406	0.046374	0.797199	4.98472			-0.0334854	0.0224385	0.799448	4.887			-0.0404406	0.046374	0.795975	4.887
-0.0403917	0.0455171	0.797363	4.98497			-0.0332142	0.0217886	0.799458	4.88815			-0.0403917	0.0455171	0.796193	4.88815
-0.0403326	0.044664	0.797522	4.98522			-0.0329378	0.0211465	0.799465	4.88929			-0.0403326	0.044664	0.796404	4.88929
-0.0402635	0.043815	0.797675	4.98546			-0.0326565	0.0205124	0.799468	4.89042			-0.0402635	0.043815	0.796609	4.89042
-0.0401846	0.0429703	0.797823	4.9857			-0.0323705	0.0198863	0.799469	4.89154			-0.0401846	0.0429703	0.796808	4.89154
-0.0400958	0.04213	0.797965	4.98593			-0.03208	0.0192682	0.799466	4.89265			-0.0400958	0.04213	0.797001	4.89265
-0.0399975	0.0412945	0.798101	4.98617			-0.031785	0.0186583	0.79946	4.89375			-0.0399975	0.0412945	0.797187	4.89375
-0.0398898	0.0404638	0.798232	4.98639			-0.0314857	0.0180565	0.799451	4.89483			-0.0398898	0.0404638	0.797367	4.89483
-0.0397728	0.0396382	0.798358	4.98661			-0.0311824	0.0174629	0.79944	4.8959			-0.0397728	0.0396382	0.797542	4.8959
-0.0396467	0.0388179	0.798479	4.98683			-0.0308751	0.0168777	0.799426	4.89697			-0.0396467	0.0388179	0.79771	4.89697
-0.0395116	0.038003	0.798594	4.98705			-0.0305641	0.0163007	0.799408	4.89802			-0.0395116	0.038003	0.797873	4.89802
-0.0393677	0.0371936	0.798704	4.98726			-0.0302495	0.0157321	0.799389	4.89906			-0.0393677	0.0371936	0.79803	4.89906
-0.0392151	0.0363901	0.798809	4.98747			-0.0299314	0.0151718	0.799366	4.90009			-0.0392151	0.0363901	0.798181	4.90009
-0.0390541	0.0355924	0.798909	4.98767			-0.02961	0.01462	0.799341	4.90111			-0.0390541	0.0355924	0.798326	4.90111
-0.0388848	0.0348009	0.799005	4.98787			-0.0292855	0.0140767	0.799314	4.90212			-0.0388848	0.0348009	0.798466	4.90212
-0.0387073	0.0340156	0.799095	4.98807			-0.028958	0.0135418	0.799284	4.90311			-0.0387073	0.0340156	0.798601	4.90311
-0.0385218	0.0332367	0.799181	4.98827			-0.0286277	0.0130153	0.799251	4.9041			-0.0385218	0.0332367	0.79873	4.9041
-0.0383285	0.0324643	0.799262	4.98846			-0.0282947	0.0124974	0.799217	4.90508			-0.0383285	0.0324643	0.798853	4.90508
-0.0381276	0.0316986	0.799338	4.98865			-0.0279593	0.011988	0.79918	4.90605			-0.0381276	0.0316986	0.798972	4.90605
-0.0379192	0.0309397	0.79941	4.98883			-0.0276214	0.0114872	0.79914	4.90701			-0.0379192	0.0309397	0.799085	4.90701
-0.0377034	0.0301877	0.799477	4.98901			-0.0272814	0.0109948	0.799099	4.90796			-0.0377034	0.0301877	0.799193	4.90796
-0.0374806	0.0294428	0.79954	4.98919			-0.0269393	0.010511	0.799056	4.90889			-0.0374806	0.0294428	0.799296	4.90889
-0.0372507	0.028705	0.799598	4.98937			-0.0265953	0.0100357	0.79901	4.90982			-0.0372507	0.028705	0.799394	4.90982
-0.0370141	0.0279746	0.799653	4.98954			-0.0262495	0.009569	0.798963	4.91074			-0.0370141	0.0279746	0.799487	4.91074
-0.0367708	0.0272515	0.799703	4.98971			-0.0259021	0.00911077	0.798913	4.91165			-0.0367708	0.0272515	0.799575	4.91165
-0.0365211	0.026536	0.799749	4.98988			-0.0255532	0.00866105	0.798862	4.91255			-0.0365211	0.026536	0.799659	4.91255
-0.036265	0.025828	0.799791	4.99004			-0.025203	0.00821983	0.798809	4.91345			-0.036265	0.025828	0.799737	4.91345
-0.0360029	0.0251278	0.799829	4.99021			-0.0248516	0.00778708	0.798754	4.91433			-0.0360029	0.0251278	0.799811	4.91433
-0.0357348	0.0244353	0.799863	4.99037			-0.0244992	0.00736279	0.798697	4.9152			-0.0357348	0.0244353	0.799881	4.9152
-0.035461	0.0237508	0.799893	4.99052			-0.0241458	0.00694693	0.798639	4.91607			-0.035461	0.0237508	0.799946	4.91607
-0.0351816	0.0230742	0.799919	4.99068			-0.0237917	0.00653947	0.798579	4.91692			-0.0351816	0.0230742	0.800007	4.91692
-0.0348967	0.0224056	0.799942	4.99083			-0.0234369	0.0061404	0.798518	4.91777			-0.0348967	0.0224056	0.800063	4.91777
-0.0346066	0.0217451	0.799961	4.99098			-0.0230816	0.00574968	0.798455	4.91861			-0.0346066	0.0217451	0.800115	4.91861
-0.0343114	0.0210929	0.799977	4.99112			-0.0227259	0.00536726	0.798391	4.91944			-0.0343114	0.0210929	0.800163	4.91944
-0.0340113	0.0204489	0.799989	4.99127			-0.02237	0.00499313	0.798325	4.92026			-0.0340113	0.0204489	0.800207	4.92026
-0.0337064	0.0198131	0.799997	4.99141			-0.0220139	0.00462723	0.798258	4.92107			-0.0337064	0.0198131	0.800246	4.92107
-0.033397	0.0191858	0.800003	4.99155			-0.0216578	0.00426953	0.798189	4.92187			-0.033397	0.0191858	0.800282	4.92187
-0.0330832	0.0185668	0.800005	4.99168			-0.0213019	0.00391997	0.79812	4.92267			-0.0330832	0.0185668	0.800314	4.92267
-0.0327651	0.0179564	0.800003	4.99182			-0.0209461	0.00357852	0.798049	4.92346			-0.0327651	0.0179564	0.800342	4.92346
-0.032443	0.0173544	0.799999	4.99195			-0.0205908	0.00324513	0.797976	4.92424			-0.032443	0.0173544	0.800366	4.92424
-0.032117	0.016761	0.799991	4.99208			-0.0202359	0.00291974	0.797903	4.92501			-0.032117	0.016761	0.800386	4.92501
-0.0317873	0.0161762	0.799981	4.99221			-0.0198816	0.0026023	0.797829	4.92577			-0.0317873	0.0161762	0.800403	4.92577
-0.031454	0.0156	0.799968	4.99234			-0.0195281	0.00229276	0.797754	4.92653			-0.031454	0.0156	0.800416	4.92653
-0.0311173	0.0150324	0.799951	4.99246			-0.0191753	0.00199105	0.797677	4.92728			-0.0311173	0.0150324	0.800426	4.92728
-0.0307774	0.0144735	0.799932	4.99258			-0.0188235	0.00169712	0.7976	4.92802			-0.0307774	0.0144735	0.800432	4.92802
-0.0304344	0.0139233	0.79991	4.9927			-0.0184727	0.00141091	0.797522	4.92875			-0.0304344	0.0139233	0.800435	4.92875
-0.0300885	0.0133818	0.799886	4.99282			-0.018123	0.00113235	0.797443	4.92948			-0.0300885	0.0133818	0.800435	4.92948
-0.0297398	0.012849	0.799858	4.99293			-0.0177746	0.000861373	0.797363	4.9302			-0.0297398	0.012849	0.800431	4.9302
-0.0293886	0.0123249	0.799829	4.99305			-0.0174275	0.000597921	0.797282	4.93091			-0.0293886	0.0123249	0.800424	4.93091
-0.0290349	0.0118096	0.799796	4.99316			-0.0170819	0.000341921	0.797201	4.93161			-0.0290349	0.0118096	0.800415	4.93161
-0.0286789	0.011303	0.799761	4.99327			-0.0167378	9.33021e-05	0.797119	4.93231			-0.0286789	0.011303	0.800402	4.93231
-0.0283208	0.0108052	0.799724	4.99338			-0.0163953	-0.000148007	0.797036	4.933			-0.0283208	0.0108052	0.800386	4.933
-0.0279608	0.0103161	0.799685	4.99349			-0.0160546	-0.000382079	0.796952	4.93368			-0.0279608	0.0103161	0.800367	4.93368
-0.0275989	0.00983566	0.799643	4.99359			-0.0157157	-0.00060899	0.796868	4.93436			-0.0275989	0.00983566	0.800346	4.93436
-0.0272354	0.00936398	0.799599	4.99369			-0.0153787	-0.000828815	0.796784	4.93503			-0.0272354	0.00936398	0.800321	4.93503
-0.0268704	0.00890099	0.799553	4.9938			-0.0150436	-0.00104163	0.796699	4.93569			-0.0268704	0.00890099	0.800294	4.93569
-0.026504	0.00844669	0.799505	4.99389			-0.0147107	-0.00124752	0.796613	4.93634			-0.026504	0.00844669	0.800265	4.93634
-0.0261364	0.00800105	0.799455	4.99399			-0.0143799	-0.00144656	0.796527	4.93699			-0.0261364	0.00800105	0.800232	4.93699
-0.0257677	0.00756404	0.799403	4.99409			-0.0140513	-0.00163883	0.79644	4.93763			-0.0257677	0.00756404	0.800198	4.93763
-0.025398	0.00713565	0.799349	4.99418			-0.0137251	-0.00182442	0.796353	4.93827			-0.025398	0.00713565	0.800161	4.93827
-0.0250276	0.00671584	0.799293	4.99428			-0.0134012	-0.0020034	0.796266	4.9389			-0.0250276	0.00671584	0.800121	4.9389
-0.0246565	0.00630459	0.799236	4.99437			-0.0130798	-0.00217587	0.796178	4.93952			-0.0246565	0.00630459	0.800079	4.93952
-0.024285	0.00590185	0.799176	4.99446			-0.0127609	-0.0023419	0.79609	4.94013			-0.024285	0.00590185	0.800035	4.94013
-0.023913	0.00550759	0.799115	4.99455			-0.0124446	-0.00250159	0.796002	4.94074			-0.023913	0.00550759	0.799989	4.94074
-0.0235408	0.00512177	0.799053	4.99464			-0.012131	-0.00265502	0.795914	4.94135			-0.0235408	0.00512177	0.79994	4.94135
-0.0231684	0.00474434	0.798989	4.99472			-0.0118201	-0.00280227	0.795825	4.94194			-0.0231684	0.00474434	0.79989	4.94194
-0.0227961	0.00437527	0.798923	4.99481			-0.011512	-0.00294345	0.795736	4.94253			-0.0227961	0.00437527	0.799837	4.94253
-0.0224239	0.00401451	0.798856	4.99489			-0.0112068	-0.00307863	0.795647	4.94312			-0.0224239	0.00401451	0.799783	4.94312
-0.022052	0.003662	0.798787	4.99497			-0.0109044	-0.0032079	0.795558	4.9437			-0.022052	0.003662	0.799726	4.9437
-0.0216805	0.00331769	0.798717	4.99505			-0.0106051	-0.00333136	0.795468	4.94427			-0.0216805	0.00331769	0.799668	4.94427
-0.0213095	0.00298154	0.798646	4.99513			-0.0103087	-0.0034491	0.795379	4.94484			-0.0213095	0.00298154	0.799608	4.94484
-0.0209391	0.00265348	0.798573	4.99521			-0.0100155	-0.00356121	0.79529	4.9454			-0.0209391	0.00265348	0.799546	4.9454
-0.0205695	0.00233345	0.798499	4.99529			-0.0097253	-0.00366778	0.7952	4.94596			-0.0205695	0.00233345	0.799482	4.94596
-0.0202007	0.0020214	0.798424	4.99536			-0.00943831	-0.0037689	0.79511	4.94651			-0.0202007	0.0020214	0.799417	4.94651
-0.0198329	0.00171726	0.798348	4.99544			-0.00915454	-0.00386466	0.795021	4.94705			-0.0198329	0.00171726	0.799351	4.94705
-0.0194662	0.00142097	0.798271	4.99551			-0.00887403	-0.00395517	0.794931	4.94759			-0.0194662	0.00142097	0.799282	4.94759
-0.0191007	0.00113246	0.798193	4.99558			-0.00859682	-0.0040405	0.794842	4.94812			-0.0191007	0.00113246	0.799213	4.94812
-0.0187365	0.000851661	0.798114	4.99565			-0.00832295	-0.00412076	0.794752	4.94865			-0.0187365	0.000851661	0.799141	4.94865
-0.0183737	0.00057851	0.798033	4.99572			-0.00805245	-0.00419604	0.794663	4.94917			-0.0183737	0.00057851	0.799069	4.94917
-0.0180124	0.000312932	0.797952	4.99579			-0.00778537	-0.00426642	0.794574	4.94969			-0.0180124	0.000312932	0.798995	4.94969
-0.0176527	5.48551e-05	0.79787	4.99586			-0.00752173	-0.00433202	0.794485	4.9502			-0.0176527	5.48551e-05	0.79892	4.9502
-0.0172947	-0.000195796	0.797788	4.99592			-0.00726157	-0.00439291	0.794396	4.95071			-0.0172947	-0.000195796	0.798843	4.95071
-0.0169386	-0.000439097	0.797704	4.99599			-0.00700492	-0.00444919	0.794307	4.95121			-0.0169386	-0.000439097	0.798766	4.95121
-0.0165843	-0.000675125	0.79762	4.99605			-0.0067518	-0.00450096	0.794218	4.95171			-0.0165843	-0.000675125	0.798687	4.95171
-0.016232	-0.000903959	0.797535	4.99611			-0.00650224	-0.0045483	0.794129	4.9522			-0.016232	-0.000903959	0.798607	4.9522
-0.0158818	-0.00112568	0.797449	4.99618			-0.00625627	-0.00459132	0.794041	4.95269			-0.0158818	-0.00112568	0.798527	4.95269
-0.0155338	-0.00134037	0.797363	4.99624			-0.00601391	-0.0046301	0.793953	4.95317			-0.0155338	-0.00134037	0.798445	4.95317
-0.015188	-0.0015481	0.797276	4.9963			-0.00577518	-0.00466475	0.793865	4.95364			-0.015188	-0.0015481	0.798362	4.95364
-0.0148445	-0.00174897	0.797188	4.99636			-0.00554009	-0.00469534	0.793778	4.95412			-0.0148445	-0.00174897	0.798278	4.95412
-0.0145034	-0.00194305	0.7971	4.99641			-0.00530867	-0.00472198	0.79369	4.95458			-0.0145034	-0.00194305	0.798194	4.95458
-0.0141648	-0.00213044	0.797012	4.99647			-0.00508093	-0.00474475	0.793603	4.95504			-0.0141648	-0.00213044	0.798108	4.95504
-0.0138288	-0.00231122	0.796923	4.99653			-0.00485688	-0.00476375	0.793516	4.9555			-0.0138288	-0.00231122	0.798022	4.9555
-0.0134954	-0.00248547	0.796833	4.99658			-0.00463654	-0.00477907	0.79343	4.95596			-0.0134954	-0.00248547	0.797935	4.95596
-0.0131648	-0.00265329	0.796743	4.99664			-0.00441991	-0.0047908	0.793344	4.9564			-0.0131648	-0.00265329	0.797848	4.9564
-0.0128369	-0.00281476	0.796653	4.99669			-0.004207	-0.00479902	0.793258	4.95685			-0.0128369	-0.00281476	0.797759	4.95685
-0.0125118	-0.00296998	0.796563	4.99674			-0.00399783	-0.00480384	0.793172	4.95729			-0.0125118	-0.00296998	0.79767	4.95729
-0.0121897	-0.00311903	0.796472	4.99679			-0.00379239	-0.00480534	0.793087	4.95772			-0.0121897	-0.00311903	0.797581	4.95772
-0.0118705	-0.003262	0.796381	4.99685			-0.00359069	-0.00480361	0.793002	4.95815			-0.0118705	-0.003262	0.797491	4.95815
-0.0115543	-0.00339899	0.79629	4.9969			-0.00339274	-0.00479874	0.792918	4.95858			-0.0115543	-0.00339899	0.7974	4.95858
-0.0112412	-0.00353009	0.796198	4.99694			-0.00319852	-0.00479081	0.792834	4.959			-0.0112412	-0.00353009	0.797309	4.959
-0.0109313	-0.00365539	0.796106	4.99699			-0.00300805	-0.00477991	0.79275	4.95942			-0.0109313	-0.00365539	0.797217	4.95942
-0.0106245	-0.00377499	0.796014	4.99704			-0.00282132	-0.00476613	0.792667	4.95983			-0.0106245	-0.00377499	0.797125	4.95983
-0.0103211	-0.00388897	0.795922	4.99709			-0.00263832	-0.00474956	0.792584	4.96024			-0.0103211	-0.00388897	0.797033	4.96024
-0.0100208	-0.00399743	0.79583	4.99713			-0.00245905	-0.00473028	0.792501	4.96064			-0.0100208	-0.00399743	0.79694	4.96064
-0.00972398	-0.00410047	0.795738	4.99718			-0.00228351	-0.00470838	0.792419	4.96104			-0.00972398	-0.00410047	0.796847	4.96104
-0.00943051	-0.00419818	0.795646	4.99722			-0.00211169	-0.00468393	0.792338	4.96144			-0.00943051	-0.00419818	0.796753	4.96144
-0.00914046	-0.00429065	0.795553	4.99727			-0.00194357	-0.00465703	0.792256	4.96183			-0.00914046	-0.00429065	0.79666	4.96183
-0.00885388	-0.00437799	0.795461	4.99731			-0.00177914	-0.00462775	0.792175	4.96222			-0.00885388	-0.00437799	0.796566	4.96222
-0.0085708	-0.00446027	0.795369	4.99735			-0.0016184	-0.00459618	0.792095	4.9626			-0.0085708	-0.00446027	0.796471	4.9626
-0.00829127	-0.00453761	0.795276	4.9974			-0.00146133	-0.0045624	0.792015	4.96298			-0.00829127	-0.00453761	0.796377	4.96298
-0.00801532	-0.00461008	0.795184	4.99744			-0.00130792	-0.00452648	0.791936	4.96336			-0.00801532	-0.00461008	0.796283	4.96336
-0.00774298	-0.0046778	0.795092	4.99748			-0.00115815	-0.00448851	0.791857	4.96373			-0.00774298	-0.0046778	0.796188	4.96373
-0.00747428	-0.00474085	0.795	4.99752			-0.00101201	-0.00444857	0.791778	4.9641			-0.00747428	-0.00474085	0.796093	4.9641
-0.00720926	-0.00479932	0.794908	4.99756			-0.000869471	-0.00440672	0.7917	4.96447			-0.00720926	-0.00479932	0.795998	4.96447
-0.00694793	-0.00485332	0.794816	4.9976			-0.000730521	-0.00436306	0.791623	4.96483			-0.00694793	-0.00485332	0.795903	4.96483
-0.00669032	-0.00490293	0.794724	4.99763			-0.000595139	-0.00431765	0.791546	4.96519			-0.00669032	-0.00490293	0.795808	4.96519
-0.00643645	-0.00494826	0.794633	4.99767			-0.000463303	-0.00427057	0.791469	4.96554			-0.00643645	-0.00494826	0.795713	4.96554
-0.00618636	-0.00498938	0.794541	4.99771			-0.000334992	-0.00422189	0.791393	4.96589			-0.00618636	-0.00498938	0.795619	4.96589
-0.00594004	-0.00502641	0.79445	4.99774			-0.000210183	-0.00417168	0.791317	4.96624			-0.00594004	-0.00502641	0.795524	4.96624
-0.00569753	-0.00505943	0.794359	4.99778			-8.88505e-05	-0.00412003	0.791242	4.96658			-0.00569753	-0.00505943	0.795429	4.96658
-0.00545884	-0.00508853	0.794268	4.99782			2.90297e-05	-0.00406699	0.791168	4.96692			-0.00545884	-0.00508853	0.795334	4.96692
-0.00522398	-0.0051138	0.794178	4.99785			0.000143484	-0.00401263	0.791094	4.96726			-0.00522398	-0.0051138	0.795239	4.96726
-0.00499296	-0.00513535	0.794087	4.99788			0.000254539	-0.00395704	0.79102	4.96759			-0.00499296	-0.00513535	0.795145	4.96759
-0.0047658	-0.00515326	0.793997	4.99792			0.000362222	-0.00390027	0.790947	4.96792			-0.0047658	-0.00515326	0.79505	4.96792
-0.0045425	-0.00516761	0.793907	4.99795			0.000466563	-0.00384238	0.790875	4.96825			-0.0045425	-0.00516761	0.794956	4.96825
-0.00432307	-0.00517851	0.793818	4.99798			0.00056759	-0.00378346	0.790803	4.96857			-0.00432307	-0.00517851	0.794862	4.96857
-0.00410751	-0.00518605	0.793729	4.99802			0.000665335	-0.00372356	0.790731	4.96889			-0.00410751	-0.00518605	0.794768	4.96889
-0.00389583	-0.0051903	0.79364	4.99805			0.000759827	-0.00366274	0.79066	4.96921			-0.00389583	-0.0051903	0.794674	4.96921
-0.00368803	-0.00519136	0.793551	4.99808			0.0008511	-0.00360107	0.79059	4.96952			-0.00368803	-0.00519136	0.79458	4.96952
-0.00348412	-0.00518933	0.793463	4.99811			0.000939184	-0.00353861	0.79052	4.96983			-0.00348412	-0.00518933	0.794487	4.96983
-0.00328408	-0.00518428	0.793375	4.99814			0.00102411	-0.00347542	0.79045	4.97014			-0.00328408	-0.00518428	0.794394	4.97014
-0.00308792	-0.0051763	0.793288	4.99817			0.00110592	-0.00341155	0.790381	4.97044			-0.00308792	-0.0051763	0.794301	4.97044
-0.00289564	-0.00516548	0.793201	4.9982			0.00118465	-0.00334708	0.790313	4.97074			-0.00289564	-0.00516548	0.794209	4.97074
-0.00270722	-0.00515191	0.793114	4.99822			0.00126032	-0.00328205	0.790245	4.97104			-0.00270722	-0.00515191	0.794116	4.97104
-0.00252266	-0.00513567	0.793028	4.99825			0.00133297	-0.00321652	0.790178	4.97133			-0.00252266	-0.00513567	0.794024	4.97133
-0.00234196	-0.00511685	0.792942	4.99828			0.00140265	-0.00315055	0.790111	4.97163			-0.00234196	-0.00511685	0.793933	4.97163
-0.0021651	-0.00509552	0.792856	4.99831			0.00146938	-0.00308419	0.790045	4.97191			-0.0021651	-0.00509552	0.793841	4.97191
-0.00199207	-0.00507178	0.792771	4.99833			0.00153321	-0.00301749	0.789979	4.9722			-0.00199207	-0.00507178	0.79375	4.9722
-0.00182286	-0.00504569	0.792686	4.99836			0.00159417	-0.0029505	0.789914	4.97248			-0.00182286	-0.00504569	0.79366	4.97248
-0.00165745	-0.00501735	0.792602	4.99839			0.0016523	-0.00288329	0.78985	4.97276			-0.00165745	-0.00501735	0.79357	4.97276
-0.00149584	-0.00498683	0.792518	4.99841			0.00170764	-0.00281588	0.789785	4.97304			-0.00149584	-0.00498683	0.79348	4.97304
-0.001338	-0.00495422	0.792435	4.99844			0.00176023	-0.00274835	0.789722	4.97331			-0.001338	-0.00495422	0.79339	4.97331
-0.00118392	-0.00491958	0.792352	4.99846			0.0018101	-0.00268072	0.789659	4.97359			-0.00118392	-0.00491958	0.793301	4.97359
-0.00103357	-0.00488301	0.79227	4.99849			0.0018573	-0.00261305	0.789596	4.97385			-0.00103357	-0.00488301	0.793212	4.97385
-0.000886945	-0.00484456	0.792188	4.99851			0.00190187	-0.00254539	0.789535	4.97412			-0.000886945	-0.00484456	0.793124	4.97412
-0.000744017	-0.00480433	0.792106	4.99853			0.00194385	-0.00247777	0.789473	4.97438			-0.000744017	-0.00480433	0.793036	4.97438
-0.000604766	-0.00476238	0.792025	4.99856			0.00198328	-0.00241025	0.789412	4.97464			-0.000604766	-0.00476238	0.792949	4.97464
-0.000469167	-0.00471879	0.791945	4.99858			0.00202019	-0.00234286	0.789352	4.9749			-0.000469167	-0.00471879	0.792862	4.9749
-0.000337197	-0.00467363	0.791864	4.9986			0.00205464	-0.00227564	0.789292	4.97516			-0.000337197	-0.00467363	0.792775	4.97516
-0.00020883	-0.00462697	0.791785	4.99862			0.00208665	-0.00220864	0.789233	4.97541			-0.00020883	-0.00462697	0.792689	4.97541
-8.40421e-05	-0.00457888	0.791706	4.99865			0.00211628	-0.00214189	0.789174	4.97566			-8.40421e-05	-0.00457888	0.792603	4.97566
3.71954e-05	-0.00452944	0.791627	4.99867			0.00214357	-0.00207544	0.789116	4.97591			3.71954e-05	-0.00452944	0.792518	4.97591
0.00015491	-0.0044787	0.791549	4.99869			0.00216856	-0.00200931	0.789058	4.97615			0.00015491	-0.0044787	0.792433	4.97615
0.00026913	-0.00442674	0.791471	4.99871			0.00219128	-0.00194355	0.789001	4.9764			0.00026913	-0.00442674	0.792349	4.9764
0.000379886	-0.00437363	0.791394	4.99873			0.00221179	-0.00187818	0.788945	4.97664			0.000379886	-0.00437363	0.792265	4.97664
0.000487208	-0.00431943	0.791318	4.99875			0.00223012	-0.00181325	0.788889	4.97687			0.000487208	-0.00431943	0.792182	4.97687
0.000591127	-0.0042642	0.791242	4.99877			0.00224632	-0.00174878	0.788833	4.97711			0.000591127	-0.0042642	0.792099	4.97711
0.000691676	-0.00420801	0.791166	4.99879			0.00226042	-0.00168481	0.788778	4.97734			0.000691676	-0.00420801	0.792017	4.97734
0.000788887	-0.00415092	0.791091	4.99881			0.00227248	-0.00162137	0.788724	4.97757			0.000788887	-0.00415092	0.791935	4.97757
0.000882793	-0.00409299	0.791017	4.99883			0.00228254	-0.00155848	0.78867	4.9778			0.000882793	-0.00409299	0.791854	4.9778
0.00097343	-0.00403429	0.790943	4.99885			0.00229063	-0.00149619	0.788616	4.97803			0.00097343	-0.00403429	0.791773	4.97803
0.00106083	-0.00397486	0.790869	4.99886			0.0022968	-0.0014345	0.788563	4.97825			0.00106083	-0.00397486	0.791693	4.97825
0.00114503	-0.00391477	0.790797	4.99888			0.00230109	-0.00137346	0.788511	4.97847			0.00114503	-0.00391477	0.791613	4.97847
0.00122607	-0.00385407	0.790724	4.9989			0.00230355	-0.00131308	0.788459	4.97869			0.00122607	-0.00385407	0.791534	4.97869
0.00130399	-0.00379283	0.790652	4.99892			0.00230422	-0.00125339	0.788408	4.97891			0.00130399	-0.00379283	0.791456	4.97891
0.00137881	-0.00373109	0.790581	4.99893			0.00230314	-0.00119442	0.788357	4.97912			0.00137881	-0.00373109	0.791377	4.97912
0.00145058	-0.00366891	0.79051	4.99895			0.00230034	-0.00113618	0.788306	4.97933			0.00145058	-0.00366891	0.7913	4.97933
0.00151934	-0.00360635	0.79044	4.99897			0.00229589	-0.0010787	0.788257	4.97954			0.00151934	-0.00360635	0.791223	4.97954
0.00158513	-0.00354344	0.790371	4.99898			0.00228981	-0.00102201	0.788207	4.97975			0.00158513	-0.00354344	0.791146	4.97975
0.00164798	-0.00348025	0.790301	4.999			0.00228214	-0.000966113	0.788159	4.97996			0.00164798	-0.00348025	0.79107	4.97996
0.00170794	-0.00341683	0.790233	4.99902			0.00227294	-0.000911037	0.78811	4.98016			0.00170794	-0.00341683	0.790995	4.98016
0.00176504	-0.00335321	0.790165	4.99903			0.00226224	-0.000856798	0.788062	4.98036			0.00176504	-0.00335321	0.79092	4.98036
0.00181933	-0.00328945	0.790097	4.99905			0.00225008	-0.000803414	0.788015	4.98056			0.00181933	-0.00328945	0.790846	4.98056
0.00187085	-0.00322559	0.790031	4.99906			0.00223651	-0.000750902	0.787968	4.98076			0.00187085	-0.00322559	0.790772	4.98076
0.00191964	-0.00316169	0.789964	4.99908			0.00222156	-0.000699277	0.787922	4.98096			0.00191964	-0.00316169	0.790699	4.98096
0.00196573	-0.00309777	0.789898	4.99909			0.00220528	-0.000648554	0.787876	4.98115			0.00196573	-0.00309777	0.790626	4.98115
0.00200918	-0.0030339	0.789833	4.99911			0.0021877	-0.000598746	0.787831	4.98134			0.00200918	-0.0030339	0.790554	4.98134
0.00205003	-0.00297009	0.789768	4.99912			0.00216887	-0.000549868	0.787786	4.98153			0.00205003	-0.00297009	0.790483	4.98153
0.00208831	-0.00290641	0.789704	4.99913			0.00214882	-0.00050193	0.787742	4.98172			0.00208831	-0.00290641	0.790412	4.98172
0.00212407	-0.00284288	0.789641	4.99915			0.00212761	-0.000454945	0.787698	4.98191			0.00212407	-0.00284288	0.790342	4.98191
0.00215735	-0.00277955	0.789577	4.99916			0.00210526	-0.000408923	0.787655	4.98209			0.00215735	-0.00277955	0.790272	4.98209
0.0021882	-0.00271645	0.789515	4.99917			0.00208181	-0.000363874	0.787612	4.98227			0.0021882	-0.00271645	0.790203	4.98227
0.00221666	-0.00265362	0.789453	4.99919			0.00205731	-0.000319807	0.787569	4.98245			0.00221666	-0.00265362	0.790134	4.98245
0.00224277	-0.0025911	0.789392	4.9992			0.00203179	-0.000276731	0.787528	4.98263			0.00224277	-0.0025911	0.790066	4.98263
0.00226658	-0.00252891	0.789331	4.99921			0.00200528	-0.000234652	0.787486	4.98281			0.00226658	-0.00252891	0.789998	4.98281
0.00228813	-0.0024671	0.78927	4.99923			0.00197784	-0.000193578	0.787445	4.98298			0.00228813	-0.0024671	0.789931	4.98298
0.00230746	-0.00240569	0.78921	4.99924			0.00194949	-0.000153516	0.787405	4.98316			0.00230746	-0.00240569	0.789865	4.98316
0.00232462	-0.00234472	0.789151	4.99925			0.00192028	-0.000114469	0.787365	4.98333			0.00232462	-0.00234472	0.789799	4.98333
0.00233965	-0.00228421	0.789093	4.99926			0.00189023	-7.64434e-05	0.787325	4.9835			0.00233965	-0.00228421	0.789734	4.9835
0.00235259	-0.0022242	0.789034	4.99927			0.00185939	-3.94428e-05	0.787286	4.98367			0.00235259	-0.0022242	0.789669	4.98367
0.0023635	-0.00216471	0.788977	4.99928			0.00182779	-3.47054e-06	0.787247	4.98383			0.0023635	-0.00216471	0.789605	4.98383
0.00237241	-0.00210577	0.78892	4.9993			0.00179547	3.14707e-05	0.787209	4.984			0.00237241	-0.00210577	0.789541	4.984
0.00237936	-0.0020474	0.788863	4.99931			0.00176246	6.5379e-05	0.787172	4.98416			0.00237936	-0.0020474	0.789478	4.98416
0.0023844	-0.00198964	0.788807	4.99932			0.0017288	9.82528e-05	0.787134	4.98432			0.0023844	-0.00198964	0.789416	4.98432
0.00238758	-0.00193251	0.788752	4.99933			0.00169451	0.000130091	0.787098	4.98448			0.00238758	-0.00193251	0.789354	4.98448
0.00238894	-0.00187602	0.788697	4.99934			0.00165965	0.000160895	0.787061	4.98464			0.00238894	-0.00187602	0.789292	4.98464
0.00238851	-0.00182021	0.788642	4.99935			0.00162423	0.000190663	0.787025	4.98479			0.00238851	-0.00182021	0.789232	4.98479
0.00238635	-0.00176509	0.788588	4.99936			0.00158829	0.000219398	0.78699	4.98495			0.00238635	-0.00176509	0.789171	4.98495
0.0023825	-0.00171068	0.788535	4.99937			0.00155187	0.0002471	0.786955	4.9851			0.0023825	-0.00171068	0.789112	4.9851
0.002377	-0.00165701	0.788482	4.99938			0.00151499	0.000273772	0.78692	4.98525			0.002377	-0.00165701	0.789053	4.98525
0.00236989	-0.00160409	0.78843	4.99939			0.00147769	0.000299417	0.786886	4.9854			0.00236989	-0.00160409	0.788994	4.9854
0.00236122	-0.00155194	0.788378	4.9994			0.00143999	0.000324037	0.786852	4.98555			0.00236122	-0.00155194	0.788936	4.98555
0.00235103	-0.00150058	0.788327	4.99941			0.00140194	0.000347637	0.786819	4.9857			0.00235103	-0.00150058	0.788879	4.9857
0.00233936	-0.00145002	0.788276	4.99942			0.00136356	0.000370221	0.786786	4.98584			0.00233936	-0.00145002	0.788822	4.98584
0.00232626	-0.00140028	0.788226	4.99943			0.00132488	0.000391793	0.786754	4.98599			0.00232626	-0.00140028	0.788766	4.98599
0.00231176	-0.00135138	0.788176	4.99944			0.00128592	0.00041236	0.786722	4.98613			0.00231176	-0.00135138	0.78871	4.98613
0.0022959	-0.00130332	0.788127	4.99945			0.00124672	0.000431925	0.78669	4.98627			0.0022959	-0.00130332	0.788655	4.98627
0.00227874	-0.00125612	0.788079	4.99945			0.00120731	0.000450497	0.786659	4.98641			0.00227874	-0.00125612	0.7886	4.98641
0.0022603	-0.00120979	0.788031	4.99946			0.00116771	0.00046808	0.786628	4.98655			0.0022603	-0.00120979	0.788546	4.98655
0.00224063	-0.00116434	0.787983	4.99947			0.00112796	0.000484683	0.786598	4.98669			0.00224063	-0.00116434	0.788492	4.98669
0.00221978	-0.00111979	0.787936	4.99948			0.00108807	0.000500312	0.786568	4.98682			0.00221978	-0.00111979	0.788439	4.98682
0.00219777	-0.00107614	0.787889	4.99949			0.00104807	0.000514976	0.786538	4.98696			0.00219777	-0.00107614	0.788387	4.98696
0.00217466	-0.00103341	0.787843	4.9995			0.001008	0.000528683	0.786509	4.98709			0.00217466	-0.00103341	0.788335	4.98709
0.00215047	-0.000991591	0.787798	4.9995			0.000967867	0.000541441	0.78648	4.98722			0.00215047	-0.000991591	0.788283	4.98722
0.00212526	-0.000950701	0.787753	4.99951			0.000927707	0.00055326	0.786452	4.98735			0.00212526	-0.000950701	0.788232	4.98735
0.00209905	-0.000910746	0.787708	4.99952			0.000887541	0.000564148	0.786424	4.98748			0.00209905	-0.000910746	0.788182	4.98748
0.00207189	-0.000871731	0.787664	4.99953			0.000847394	0.000574116	0.786397	4.98761			0.00207189	-0.000871731	0.788132	4.98761
0.00204382	-0.000833661	0.78762	4.99953			0.000807288	0.000583173	0.786369	4.98773			0.00204382	-0.000833661	0.788083	4.98773
0.00201487	-0.000796541	0.787577	4.99954			0.000767246	0.00059133	0.786343	4.98786			0.00201487	-0.000796541	0.788034	4.98786
0.00198507	-0.000760376	0.787535	4.99955			0.000727291	0.000598598	0.786316	4.98798			0.00198507	-0.000760376	0.787986	4.98798
0.00195448	-0.000725167	0.787493	4.99956			0.000687444	0.000604986	0.78629	4.9881			0.00195448	-0.000725167	0.787938	4.9881
0.00192311	-0.000690918	0.787451	4.99956			0.000647727	0.000610507	0.786264	4.98822			0.00192311	-0.000690918	0.787891	4.98822
0.00189102	-0.000657631	0.78741	4.99957			0.000608161	0.000615173	0.786239	4.98834			0.00189102	-0.000657631	0.787844	4.98834
0.00185823	-0.000625307	0.787369	4.99958			0.000568765	0.000618994	0.786214	4.98846			0.00185823	-0.000625307	0.787798	4.98846
0.00182478	-0.000593948	0.787329	4.99958			0.00052956	0.000621983	0.78619	4.98858			0.00182478	-0.000593948	0.787753	4.98858
0.0017907	-0.000563552	0.787289	4.99959			0.000490564	0.000624152	0.786165	4.9887			0.0017907	-0.000563552	0.787707	4.9887
0.00175604	-0.00053412	0.78725	4.9996			0.000451797	0.000625513	0.786142	4.98881			0.00175604	-0.00053412	0.787663	4.98881
0.00172081	-0.000505651	0.787211	4.9996			0.000413277	0.00062608	0.786118	4.98892			0.00172081	-0.000505651	0.787619	4.98892
0.00168507	-0.000478144	0.787173	4.99961			0.000375022	0.000625864	0.786095	4.98904			0.00168507	-0.000478144	0.787575	4.98904
0.00164883	-0.000451595	0.787135	4.99962			0.000337048	0.00062488	0.786072	4.98915			0.00164883	-0.000451595	0.787532	4.98915
0.00161213	-0.000426003	0.787098	4.99962			0.000299373	0.00062314	0.78605	4.98926			0.00161213	-0.000426003	0.787489	4.98926
0.00157501	-0.000401365	0.787061	4.99963			0.000262013	0.000620658	0.786028	4.98937			0.00157501	-0.000401365	0.787447	4.98937
0.00153749	-0.000377677	0.787024	4.99963			0.000224983	0.000617448	0.786006	4.98948			0.00153749	-0.000377677	0.787406	4.98948
0.00149961	-0.000354934	0.786988	4.99964			0.000188299	0.000613523	0.785985	4.98958			0.00149961	-0.000354934	0.787364	4.98958
0.0014614	-0.000333133	0.786953	4.99965			0.000151976	0.000608896	0.785963	4.98969			0.0014614	-0.000333133	0.787324	4.98969
0.00142288	-0.000312269	0.786918	4.99965			0.000116028	0.000603583	0.785943	4.98979			0.00142288	-0.000312269	0.787284	4.98979
0.00138409	-0.000292335	0.786883	4.99966			8.04687e-05	0.000597597	0.785922	4.9899			0.00138409	-0.000292335	0.787244	4.9899
0.00134505	-0.000273325	0.786849	4.99966			4.53117e-05	0.000590953	0.785902	4.99			0.00134505	-0.000273325	0.787205	4.99
0.0013058	-0.000255235	0.786815	4.99967			1.05698e-05	0.000583665	0.785882	4.9901			0.0013058	-0.000255235	0.787166	4.9901
0.00126636	-0.000238056	0.786782	4.99967			-2.37446e-05	0.000575747	0.785863	4.9902			0.00126636	-0.000238056	0.787128	4.9902
0.00122676	-0.000221782	0.786749	4.99968			-5.76196e-05	0.000567213	0.785844	4.9903			0.00122676	-0.000221782	0.78709	4.9903
0.00118702	-0.000206405	0.786716	4.99968			-9.10437e-05	0.00055808	0.785825	4.9904			0.00118702	-0.000206405	0.787053	4.9904
0.00114718	-0.000191917	0.786684	4.99969			-0.000124006	0.00054836	0.785807	4.9905			0.00114718	-0.000191917	0.787016	4.9905
0.00110726	-0.00017831	0.786653	4.99969			-0.000156496	0.000538069	0.785788	4.9906			0.00110726	-0.00017831	0.78698	4.9906
0.00106728	-0.000165575	0.786621	4.9997			-0.000188503	0.000527222	0.785771	4.99069			0.00106728	-0.000165575	0.786944	4.99069
0.00102728	-0.000153703	0.786591	4.9997			-0.000220018	0.000515834	0.785753	4.99079			0.00102728	-0.000153703	0.786908	4.99079
0.000987264	-0.000142686	0.78656	4.99971			-0.000251031	0.000503918	0.785736	4.99088			0.000987264	-0.000142686	0.786873	4.99088
0.000947268	-0.000132512	0.78653	4.99971			-0.000281534	0.000491491	0.785719	4.99097			0.000947268	-0.000132512	0.786839	4.99097
0.000907314	-0.000123174	0.786501	4.99972			-0.000311519	0.000478567	0.785702	4.99106			0.000907314	-0.000123174	0.786805	4.99106
0.000867424	-0.000114659	0.786472	4.99972			-0.000340978	0.000465162	0.785686	4.99116			0.000867424	-0.000114659	0.786771	4.99116
0.000827621	-0.000106958	0.786443	4.99972			-0.000369902	0.000451289	0.785669	4.99125			0.000827621	-0.000106958	0.786738	4.99125
0.000787926	-0.00010006	0.786415	4.99973			-0.000398285	0.000436963	0.785654	4.99133			0.000787926	-0.00010006	0.786705	4.99133
0.000748362	-9.39542e-05	0.786387	4.99973			-0.000426121	0.000422201	0.785638	4.99142			0.000748362	-9.39542e-05	0.786673	4.99142
0.000708947	-8.86289e-05	0.786359	4.99974			-0.000453403	0.000407016	0.785623	4.99151			0.000708947	-8.86289e-05	0.786641	4.99151
0.000669704	-8.40728e-05	0.786332	4.99974			-0.000480126	0.000391424	0.785608	4.9916			0.000669704	-8.40728e-05	0.786609	4.9916
0.000630652	-8.02742e-05	0.786305	4.99975			-0.000506283	0.000375438	0.785593	4.99168			0.000630652	-8.02742e-05	0.786578	4.99168
0.00059181	-7.72211e-05	0.786279	4.99975			-0.000531871	0.000359075	0.785579	4.99177			0.00059181	-7.72211e-05	0.786548	4.99177
0.000553197	-7.49014e-05	0.786253	4.99975			-0.000556883	0.000342348	0.785564	4.99185			0.000553197	-7.49014e-05	0.786517	4.99185
0.000514831	-7.33027e-05	0.786227	4.99976			-0.000581317	0.000325272	0.78555	4.99193			0.000514831	-7.33027e-05	0.786488	4.99193
0.00047673	-7.24126e-05	0.786202	4.99976			-0.000605168	0.000307862	0.785537	4.99202			0.00047673	-7.24126e-05	0.786458	4.99202
0.000438911	-7.22184e-05	0.786177	4.99977			-0.000628433	0.000290132	0.785523	4.9921			0.000438911	-7.22184e-05	0.786429	4.9921
0.000401391	-7.27073e-05	0.786153	4.99977			-0.000651108	0.000272097	0.78551	4.99218			0.000401391	-7.27073e-05	0.786401	4.99218
0.000364186	-7.38662e-05	0.786128	4.99977			-0.000673191	0.000253771	0.785497	4.99226			0.000364186	-7.38662e-05	0.786373	4.99226
0.000327311	-7.5682e-05	0.786105	4.99978			-0.000694679	0.000235168	0.785485	4.99234			0.000327311	-7.5682e-05	0.786345	4.99234
0.000290783	-7.81415e-05	0.786081	4.99978			-0.000715571	0.000216303	0.785472	4.99241			0.000290783	-7.81415e-05	0.786317	4.99241
0.000254616	-8.12313e-05	0.786058	4.99978			-0.000735865	0.000197189	0.78546	4.99249			0.000254616	-8.12313e-05	0.78629	4.99249
0.000218824	-8.49379e-05	0.786036	4.99979			-0.000755559	0.00017784	0.785448	4.99257			0.000218824	-8.49379e-05	0.786264	4.99257
0.00018342	-8.92477e-05	0.786013	4.99979			-0.000774652	0.000158271	0.785436	4.99264			0.00018342	-8.92477e-05	0.786238	4.99264
0.000148419	-9.4147e-05	0.785991	4.99979			-0.000793143	0.000138495	0.785425	4.99272			0.000148419	-9.4147e-05	0.786212	4.99272
0.000113833	-9.96221e-05	0.78597	4.9998			-0.000811033	0.000118525	0.785414	4.99279			0.000113833	-9.96221e-05	0.786187	4.99279
7.96736e-05	-0.000105659	0.785948	4.9998			-0.000828321	9.83758e-05	0.785403	4.99286			7.96736e-05	-0.000105659	0.786162	4.99286
4.59535e-05	-0.000112244	0.785927	4.9998			-0.000845008	7.80598e-05	0.785392	4.99294			4.59535e-05	-0.000112244	0.786137	4.99294
1.26838e-05	-0.000119363	0.785907	4.99981			-0.000861093	5.75906e-05	0.785381	4.99301			1.26838e-05	-0.000119363	0.786113	4.99301
-2.01246e-05	-0.000127002	0.785886	4.99981			-0.000876578	3.69811e-05	0.785371	4.99308			-2.01246e-05	-0.000127002	0.786089	4.99308
-5.24611e-05	-0.000135148	0.785866	4.99981			-0.000891464	1.62444e-05	0.785361	4.99315			-5.24611e-05	-0.000135148	0.786065	4.99315
-8.43159e-05	-0.000143785	0.785847	4.99982			-0.000905753	-4.60677e-06	0.785351	4.99322			-8.43159e-05	-0.000143785	0.786042	4.99322
-0.000115679	-0.0001529	0.785828	4.99982			-0.000919445	-2.55597e-05	0.785341	4.99329			-0.000115679	-0.0001529	0.786019	4.99329
-0.000146543	-0.000162478	0.785809	4.99982			-0.000932544	-4.6602e-05	0.785332	4.99336			-0.000146543	-0.000162478	0.785997	4.99336
-0.000176897	-0.000172506	0.78579	4.99982			-0.00094505	-6.77212e-05	0.785323	4.99343			-0.000176897	-0.000172506	0.785975	4.99343
-0.000206733	-0.00018297	0.785771	4.99983			-0.000956968	-8.89052e-05	0.785313	4.99349			-0.000206733	-0.00018297	0.785953	4.99349
-0.000236045	-0.000193855	0.785753	4.99983			-0.000968299	-0.000110142	0.785305	4.99356			-0.000236045	-0.000193855	0.785932	4.99356
-0.000264825	-0.000205147	0.785736	4.99983			-0.000979047	-0.000131419	0.785296	4.99362			-0.000264825	-0.000205147	0.78591	4.99362
-0.000293065	-0.000216833	0.785718	4.99983			-0.000989214	-0.000152726	0.785288	4.99369			-0.000293065	-0.000216833	0.78589	4.99369
-0.00032076	-0.000228897	0.785701	4.99984			-0.000998805	-0.000174051	0.785279	4.99375			-0.00032076	-0.000228897	0.785869	4.99375
-0.000347903	-0.000241327	0.785684	4.99984			-0.00100782	-0.000195381	0.785271	4.99382			-0.000347903	-0.000241327	0.785849	4.99382
-0.000374488	-0.000254108	0.785668	4.99984			-0.00101627	-0.000216707	0.785263	4.99388			-0.000374488	-0.000254108	0.78583	4.99388
-0.00040051	-0.000267226	0.785651	4.99984			-0.00102416	-0.000238017	0.785256	4.99394			-0.00040051	-0.000267226	0.78581	4.99394
-0.000425965	-0.000280668	0.785635	4.99985			-0.00103148	-0.0002593	0.785248	4.994			-0.000425965	-0.000280668	0.785791	4.994
-0.000450848	-0.000294419	0.78562	4.99985			-0.00103825	-0.000280547	0.785241	4.99406			-0.000450848	-0.000294419	0.785772	4.99406
-0.000475155	-0.000308465	0.785604	4.99985			-0.00104446	-0.000301745	0.785234	4.99412			-0.000475155	-0.000308465	0.785754	4.99412
-0.000498881	-0.000322794	0.785589	4.99985			-0.00105013	-0.000322885	0.785227	4.99418			-0.000498881	-0.000322794	0.785736	4.99418
-0.000522025	-0.000337392	0.785574	4.99986			-0.00105526	-0.000343957	0.78522	4.99424			-0.000522025	-0.000337392	0.785718	4.99424
-0.000544582	-0.000352245	0.78556	4.99986			-0.00105985	-0.000364952	0.785213	4.9943			-0.000544582	-0.000352245	0.785701	4.9943
-0.000566551	-0.000367339	0.785546	4.99986			-0.00106392	-0.000385859	0.785207	4.99436			-0.000566551	-0.000367339	0.785683	4.99436
-0.000587928	-0.000382662	0.785532	4.99986			-0.00106746	-0.000406668	0.7852	4.99442			-0.000587928	-0.000382662	0.785667	4.99442
-0.000608713	-0.0003982	0.785518	4.99987			-0.00107048	-0.000427372	0.785194	4.99447			-0.000608713	-0.0003982	0.78565	4.99447
-0.000628903	-0.00041394	0.785504	4.99987			-0.00107298	-0.000447959	0.785188	4.99453			-0.000628903	-0.00041394	0.785634	4.99453
-0.000648497	-0.000429869	0.785491	4.99987			-0.00107499	-0.000468423	0.785183	4.99459			-0.000648497	-0.000429869	0.785618	4.99459
-0.000667495	-0.000445974	0.785478	4.99987			-0.00107649	-0.000488753	0.785177	4.99464			-0.000667495	-0.000445974	0.785602	4.99464
-0.000685896	-0.000462243	0.785465	4.99987			-0.00107749	-0.000508942	0.785171	4.9947			-0.000685896	-0.000462243	0.785587	4.9947
-0.000703699	-0.000478663	0.785453	4.99988			-0.00107801	-0.00052898	0.785166	4.99475			-0.000703699	-0.000478663	0.785571	4.99475
-0.000720905	-0.000495221	0.785441	4.99988			-0.00107805	-0.000548861	0.785161	4.9948			-0.000720905	-0.000495221	0.785557	4.9948
-0.000737515	-0.000511905	0.785429	4.99988			-0.00107762	-0.000568576	0.785156	4.99486			-0.000737515	-0.000511905	0.785542	4.99486
-0.000753528	-0.000528703	0.785417	4.99988			-0.00107672	-0.000588117	0.785151	4.99491			-0.000753528	-0.000528703	0.785528	4.99491
-0.000768946	-0.000545602	0.785405	4.99988			-0.00107536	-0.000607477	0.785146	4.99496			-0.000768946	-0.000545602	0.785514	4.99496
-0.00078377	-0.000562591	0.785394	4.99989			-0.00107355	-0.000626649	0.785142	4.99501			-0.00078377	-0.000562591	0.7855	4.99501
-0.000798002	-0.000579658	0.785383	4.99989			-0.00107129	-0.000645625	0.785137	4.99506			-0.000798002	-0.000579658	0.785486	4.99506
-0.000811643	-0.000596792	0.785372	4.99989			-0.0010686	-0.000664398	0.785133	4.99511			-0.000811643	-0.000596792	0.785473	4.99511
-0.000824696	-0.00061398	0.785362	4.99989			-0.00106547	-0.000682963	0.785129	4.99516			-0.000824696	-0.00061398	0.78546	4.99516
-0.000837163	-0.000631211	0.785351	4.99989			-0.00106192	-0.000701311	0.785125	4.99521			-0.000837163	-0.000631211	0.785447	4.99521
-0.000849047	-0.000648475	0.785341	4.99989			-0.00105796	-0.000719438	0.785121	4.99526			-0.000849047	-0.000648475	0.785435	4.99526
-0.000860351	-0.000665761	0.785331	4.9999			-0.00105359	-0.000737337	0.785117	4.99531			-0.000860351	-0.000665761	0.785423	4.99531
-0.000871077	-0.000683056	0.785321	4.9999			-0.00104882	-0.000755002	0.785113	4.99536			-0.000871077	-0.000683056	0.785411	4.99536
-0.00088123	-0.000700352	0.785312	4.9999			-0.00104366	-0.000772427	0.78511	4.9954			-0.00088123	-0.000700352	0.785399	4.9954
-0.000890812	-0.000717636	0.785303	4.9999			-0.00103811	-0.000789607	0.785106	4.99545			-0.000890812	-0.000717636	0.785388	4.99545
-0.000899828	-0.0007349	0.785294	4.9999			-0.00103219	-0.000806537	0.785103	4.9955			-0.000899828	-0.0007349	0.785376	4.9955
-0.000908281	-0.000752133	0.785285	4.9999			-0.0010259	-0.000823211	0.7851	4.99554			-0.000908281	-0.000752133	0.785365	4.99554
-0.000916177	-0.000769324	0.785276	4.99991			-0.00101925	-0.000839625	0.785097	4.99559			-0.000916177	-0.000769324	0.785355	4.99559
-0.000923519	-0.000786464	0.785268	4.99991			-0.00101225	-0.000855773	0.785094	4.99563			-0.000923519	-0.000786464	0.785344	4.99563
-0.000930312	-0.000803544	0.785259	4.99991			-0.00100491	-0.000871652	0.785091	4.99568			-0.000930312	-0.000803544	0.785334	4.99568
-0.000936561	-0.000820554	0.785251	4.99991			-0.00099723	-0.000887257	0.785088	4.99572			-0.000936561	-0.000820554	0.785324	4.99572
-0.000942271	-0.000837485	0.785243	4.99991			-0.000989224	-0.000902583	0.785086	4.99576			-0.000942271	-0.000837485	0.785314	4.99576
-0.000947448	-0.000854327	0.785236	4.99991			-0.000980898	-0.000917628	0.785083	4.99581			-0.000947448	-0.000854327	0.785304	4.99581
-0.000952096	-0.000871072	0.785228	4.99991			-0.000972262	-0.000932386	0.785081	4.99585			-0.000952096	-0.000871072	0.785295	4.99585
-0.000956222	-0.000887711	0.785221	4.99992			-0.000963324	-0.000946855	0.785079	4.99589			-0.000956222	-0.000887711	0.785285	4.99589
-0.000959831	-0.000904236	0.785214	4.99992			-0.000954091	-0.000961032	0.785076	4.99593			-0.000959831	-0.000904236	0.785276	4.99593
-0.00096293	-0.000920638	0.785207	4.99992			-0.000944572	-0.000974912	0.785074	4.99598			-0.00096293	-0.000920638	0.785267	4.99598
-0.000965523	-0.000936909	0.7852	4.99992			-0.000934776	-0.000988493	0.785072	4.99602			-0.000965523	-0.000936909	0.785259	4.99602
-0.000967618	-0.000953042	0.785193	4.99992			-0.00092471	-0.00100177	0.78507	4.99606			-0.000967618	-0.000953042	0.78525	4.99606
-0.000969221	-0.000969028	0.785187	4.99992			-0.000914383	-0.00101475	0.785069	4.9961			-0.000969221	-0.000969028	0.785242	4.9961
-0.000970339	-0.00098486	0.785181	4.99992			-0.000903804	-0.00102742	0.785067	4.99614			-0.000970339	-0.00098486	0.785234	4.99614
-0.000970977	-0.00100053	0.785175	4.99992			-0.00089298	-0.00103977	0.785065	4.99618			-0.000970977	-0.00100053	0.785226	4.99618
-0.000971143	-0.00101603	0.785169	4.99993			-0.000881919	-0.00105182	0.785064	4.99621			-0.000971143	-0.00101603	0.785219	4.99621
-0.000970845	-0.00103136	0.785163	4.99993			-0.00087063	-0.00106355	0.785063	4.99625			-0.000970845	-0.00103136	0.785211	4.99625
-0.000970088	-0.00104651	0.785157	4.99993			-0.000859122	-0.00107497	0.785061	4.99629			-0.000970088	-0.00104651	0.785204	4.99629
-0.000968879	-0.00106146	0.785152	4.99993			-0.000847401	-0.00108607	0.78506	4.99633			-0.000968879	-0.00106146	0.785197	4.99633
-0.000967227	-0.00107622	0.785146	4.99993			-0.000835477	-0.00109686	0.785059	4.99637			-0.000967227	-0.00107622	0.78519	4.99637
-0.000965139	-0.00109078	0.785141	4.99993			-0.000823358	-0.00110732	0.785058	4.9964			-0.000965139	-0.00109078	0.785183	4.9964
-0.000962621	-0.00110513	0.785136	4.99993			-0.00081105	-0.00111747	0.785057	4.99644			-0.000962621	-0.00110513	0.785177	4.99644
-0.000959682	-0.00111927	0.785131	4.99993			-0.000798564	-0.00112729	0.785056	4.99648			-0.000959682	-0.00111927	0.785171	4.99648
-0.000956329	-0.00113319	0.785127	4.99993			-0.000785906	-0.00113679	0.785055	4.99651			-0.000956329	-0.00113319	0.785164	4.99651
-0.000952569	-0.00114689	0.785122	4.99994			-0.000773084	-0.00114596	0.785054	4.99655			-0.000952569	-0.00114689	0.785158	4.99655
-0.000948411	-0.00116036	0.785118	4.99994			-0.000760107	-0.00115482	0.785054	4.99658			-0.000948411	-0.00116036	0.785152	4.99658
-0.000943862	-0.00117359	0.785114	4.99994			-0.000746981	-0.00116334	0.785053	4.99662			-0.000943862	-0.00117359	0.785147	4.99662
-0.00093893	-0.00118658	0.785109	4.99994			-0.000733716	-0.00117155	0.785053	4.99665			-0.00093893	-0.00118658	0.785141	4.99665
-0.000933623	-0.00119933	0.785105	4.99994			-0.000720318	-0.00117943	0.785052	4.99669			-0.000933623	-0.00119933	0.785136	4.99669
-0.000927949	-0.00121184	0.785102	4.99994			-0.000706796	-0.00118699	0.785052	4.99672			-0.000927949	-0.00121184	0.785131	4.99672
-0.000921916	-0.00122408	0.785098	4.99994			-0.000693156	-0.00119422	0.785052	4.99675			-0.000921916	-0.00122408	0.785126	4.99675
-0.000915532	-0.00123608	0.785094	4.99994			-0.000679407	-0.00120113	0.785051	4.99679			-0.000915532	-0.00123608	0.785121	4.99679
-0.000908805	-0.00124781	0.785091	4.99994			-0.000665556	-0.00120772	0.785051	4.99682			-0.000908805	-0.00124781	0.785116	4.99682
-0.000901744	-0.00125928	0.785087	4.99994			-0.00065161	-0.00121398	0.785051	4.99685			-0.000901744	-0.00125928	0.785111	4.99685
-0.000894356	-0.00127048	0.785084	4.99994			-0.000637576	-0.00121992	0.785051	4.99688			-0.000894356	-0.00127048	0.785107	4.99688
-0.000886649	-0.00128141	0.785081	4.99995			-0.000623463	-0.00122555	0.785051	4.99692			-0.000886649	-0.00128141	0.785103	4.99692
-0.000878633	-0.00129206	0.785078	4.99995			-0.000609276	-0.00123085	0.785051	4.99695			-0.000878633	-0.00129206	0.785098	4.99695
-0.000870314	-0.00130244	0.785075	4.99995			-0.000595023	-0.00123583	0.785051	4.99698			-0.000870314	-0.00130244	0.785094	4.99698
-0.000861702	-0.00131253	0.785073	4.99995			-0.000580712	-0.0012405	0.785052	4.99701			-0.000861702	-0.00131253	0.78509	4.99701
-0.000852805	-0.00132235	0.78507	4.99995			-0.000566348	-0.00124485	0.785052	4.99704			-0.000852805	-0.00132235	0.785087	4.99704
-0.00084363	-0.00133188	0.785067	4.99995			-0.00055194	-0.00124889	0.785052	4.99707			-0.00084363	-0.00133188	0.785083	4.99707
-0.000834186	-0.00134112	0.785065	4.99995			-0.000537493	-0.00125261	0.785053	4.9971			-0.000834186	-0.00134112	0.78508	4.9971
-0.000824482	-0.00135007	0.785063	4.99995			-0.000523014	-0.00125603	0.785053	4.99713			-0.000824482	-0.00135007	0.785076	4.99713
-0.000814525	-0.00135873	0.785061	4.99995			-0.00050851	-0.00125913	0.785054	4.99716			-0.000814525	-0.00135873	0.785073	4.99716
-0.000804324	-0.0013671	0.785059	4.99995			-0.000493988	-0.00126193	0.785054	4.99719			-0.000804324	-0.0013671	0.78507	4.99719
-0.000793886	-0.00137517	0.785057	4.99995			-0.000479453	-0.00126443	0.785055	4.99721			-0.000793886	-0.00137517	0.785067	4.99721
-0.000783221	-0.00138294	0.785055	4.99995			-0.000464912	-0.00126662	0.785055	4.99724			-0.000783221	-0.00138294	0.785064	4.99724
-0.000772336	-0.00139042	0.785053	4.99996			-0.000450372	-0.00126851	0.785056	4.99727			-0.000772336	-0.00139042	0.785061	4.99727
-0.00076124	-0.0013976	0.785051	4.99996			-0.000435838	-0.0012701	0.785057	4.9973			-0.00076124	-0.0013976	0.785059	4.9973
-0.00074994	-0.00140448	0.78505	4.99996			-0.000421316	-0.00127139	0.785057	4.99733			-0.00074994	-0.00140448	0.785056	4.99733
-0.000738445	-0.00141106	0.785048	4.99996			-0.000406813	-0.0012724	0.785058	4.99735			-0.000738445	-0.00141106	0.785054	4.99735
-0.000726762	-0.00141733	0.785047	4.99996			-0.000392334	-0.00127311	0.785059	4.99738			-0.000726762	-0.00141733	0.785051	4.99738
-0.0007149	-0.00142331	0.785045	4.99996			-0.000377885	-0.00127354	0.78506	4.99741			-0.0007149	-0.00142331	0.785049	4.99741
-0.000702866	-0.00142898	0.785044	4.99996			-0.000363471	-0.00127368	0.785061	4.99743			-0.000702866	-0.00142898	0.785047	4.99743
-0.000690669	-0.00143435	0.785043	4.99996			-0.000349098	-0.00127353	0.785062	4.99746			-0.000690669	-0.00143435	0.785045	4.99746
-0.000678316	-0.00143942	0.785042	4.99996			-0.000334772	-0.00127311	0.785063	4.99749			-0.000678316	-0.00143942	0.785043	4.99749
-0.000665815	-0.00144418	0.785041	4.99996			-0.000320497	-0.00127242	0.785064	4.99751			-0.000665815	-0.00144418	0.785041	4.99751
-0.000653175	-0.00144864	0.78504	4.99996			-0.000306279	-0.00127144	0.785065	4.99754			-0.000653175	-0.00144864	0.78504	4.99754
-0.000640401	-0.0014528	0.785039	4.99996			-0.000292123	-0.0012702	0.785066	4.99756			-0.000640401	-0.0014528	0.785038	4.99756
-0.000627503	-0.00145666	0.785039	4.99996			-0.000278035	-0.0012687	0.785068	4.99759			-0.000627503	-0.00145666	0.785037	4.99759
-0.000614487	-0.00146022	0.785038	4.99996			-0.000264018	-0.00126693	0.785069	4.99761			-0.000614487	-0.00146022	0.785035	4.99761
-0.000601362	-0.00146347	0.785038	4.99996			-0.000250078	-0.0012649	0.78507	4.99764			-0.000601362	-0.00146347	0.785034	4.99764
-0.000588134	-0.00146643	0.785037	4.99996			-0.000236219	-0.00126261	0.785071	4.99766			-0.000588134	-0.00146643	0.785033	4.99766
-0.000574812	-0.00146909	0.785037	4.99997			-0.000222446	-0.00126007	0.785073	4.99768			-0.000574812	-0.00146909	0.785032	4.99768
-0.000561402	-0.00147145	0.785036	4.99997			-0.000208763	-0.00125728	0.785074	4.99771			-0.000561402	-0.00147145	0.785031	4.99771
-0.000547911	-0.00147351	0.785036	4.99997			-0.000195175	-0.00125425	0.785075	4.99773			-0.000547911	-0.00147351	0.78503	4.99773
-0.000534347	-0.00147528	0.785036	4.99997			-0.000181687	-0.00125097	0.785077	4.99775			-0.000534347	-0.00147528	0.785029	4.99775
-0.000520716	-0.00147676	0.785036	4.99997			-0.000168301	-0.00124746	0.785078	4.99778			-0.000520716	-0.00147676	0.785028	4.99778
-0.000507026	-0.00147794	0.785036	4.99997			-0.000155022	-0.00124371	0.78508	4.9978			-0.000507026	-0.00147794	0.785028	4.9978
-0.000493284	-0.00147883	0.785036	4.99997			-0.000141854	-0.00123972	0.785081	4.99782			-0.000493284	-0.00147883	0.785027	4.99782
-0.000479496	-0.00147944	0.785036	4.99997			-0.000128802	-0.00123552	0.785083	4.99784			-0.000479496	-0.00147944	0.785026	4.99784
-0.00046567	-0.00147976	0.785036	4.99997			-0.000115867	-0.00123108	0.785084	4.99787			-0.00046567	-0.00147976	0.785026	4.99787
-0.000451811	-0.00147979	0.785036	4.99997			-0.000103055	-0.00122643	0.785086	4.99789			-0.000451811	-0.00147979	0.785026	4.99789
-0.000437926	-0.00147954	0.785036	4.99997			-9.03684e-05	-0.00122157	0.785087	4.99791			-0.000437926	-0.00147954	0.785025	4.99791
-0.000424022	-0.00147901	0.785037	4.99997			-7.78108e-05	-0.00121649	0.785089	4.99793			-0.000424022	-0.00147901	0.785025	4.99793
-0.000410106	-0.00147821	0.785037	4.99997			-6.53855e-05	-0.0012112	0.785091	4.99795			-0.000410106	-0.00147821	0.785025	4.99795
-0.000396182	-0.00147712	0.785038	4.99997			-5.30955e-05	-0.00120571	0.785092	4.99797			-0.000396182	-0.00147712	0.785025	4.99797
-0.000382259	-0.00147577	0.785038	4.99997			-4.0944e-05	-0.00120002	0.785094	4.99799			-0.000382259	-0.00147577	0.785025	4.99799
-0.000368341	-0.00147414	0.785039	4.99997			-2.89339e-05	-0.00119414	0.785096	4.99801			-0.000368341	-0.00147414	0.785025	4.99801
-0.000354434	-0.00147224	0.785039	4.99997			-1.7068e-05	-0.00118807	0.785098	4.99803			-0.000354434	-0.00147224	0.785025	4.99803
-0.000340545	-0.00147008	0.78504	4.99997			-5.34915e-06	-0.0011818	0.785099	4.99805			-0.000340545	-0.00147008	0.785025	4.99805
-0.00032668	-0.00146766	0.785041	4.99997			6.22012e-06	-0.00117536	0.785101	4.99807			-0.00032668	-0.00146766	0.785025	4.99807
-0.000312843	-0.00146497	0.785041	4.99997			1.76373e-05	-0.00116873	0.785103	4.99809			-0.000312843	-0.00146497	0.785026	4.99809
-0.000299041	-0.00146203	0.785042	4.99997			2.88998e-05	-0.00116193	0.785105	4.99811			-0.000299041	-0.00146203	0.785026	4.99811
-0.000285279	-0.00145884	0.785043	4.99998			4.00056e-05	-0.00115496	0.785106	4.99813			-0.000285279	-0.00145884	0.785027	4.99813
-0.000271563	-0.00145539	0.785044	4.99998			5.09522e-05	-0.00114783	0.785108	4.99815			-0.000271563	-0.00145539	0.785027	4.99815
-0.000257897	-0.0014517	0.785045	4.99998			6.17376e-05	-0.00114053	0.78511	4.99817			-0.000257897	-0.0014517	0.785028	4.99817
-0.000244287	-0.00144776	0.785046	4.99998			7.23598e-05	-0.00113307	0.785112	4.99819			-0.000244287	-0.00144776	0.785028	4.99819
-0.000230738	-0.00144358	0.785047	4.99998			8.28169e-05	-0.00112546	0.785114	4.99821			-0.000230738	-0.00144358	0.785029	4.99821
-0.000217255	-0.00143917	0.785048	4.99998			9.31071e-05	-0.0011177	0.785116	4.99822			-0.000217255	-0.00143917	0.78503	4.99822
-0.000203838	-0.00143453	0.785049	5.00002			0.000103238	-0.0011098	0.785118	4.99829			-0.000203838	-0.00143453	0.78503	4.99829
-0.000190471	-0.00142972	0.78505	5.00031			0.000113248	-0.0011018	0.785119	4.99859			-0.000190471	-0.00142972	0.785031	4.99859
-0.000177141	-0.00142479	0.785051	5.00101			0.000123172	-0.00109372	0.785121	4.99931			-0.000177141	-0.00142479	0.785032	4.99931
-0.000163837	-0.00141978	0.785053	5.00225			0.000133034	-0.00108559	0.785123	5.00057			-0.000163837	-0.00141978	0.785033	5.00057
-0.000150552	-0.0014147	0.785054	5.00413			0.00014285	-0.00107742	0.785125	5.00246			-0.000150552	-0.0014147	0.785034	5.00246
-0.000141001	-0.00141727	0.78505	5.0067			9.49625e-05	-0.00113196	0.785106	5.00493			-0.000141001	-0.00141727	0.78502	5.00493
-0.00017607	-0.00147328	0.785034	5.00999			-6.92507e-05	-0.0013135	0.78505	5.00782			-0.00017607	-0.00147328	0.784978	5.00782
-0.000298774	-0.00163099	0.784995	5.01398			-0.000427963	-0.00170767	0.784937	5.01093			-0.000298774	-0.00163099	0.784894	5.01093
-0.000555622	-0.00194171	0.784921	5.01864			-0.00106359	-0.00239253	0.784764	5.01399			-0.000555622	-0.00194171	0.784753	5.01399
-0.000992984	-0.00245681	0.784802	5.02391			-0.00204047	-0.00342799	0.784529	5.01679			-0.000992984	-0.00245681	0.784543	5.01679
-0.00165295	-0.00322228	0.784629	5.02968			-0.0033936	-0.00484335	0.784233	5.0191			-0.00165295	-0.00322228	0.784255	5.0191
-0.00255177	-0.00425395	0.7844	5.03574			-0.00509739	-0.00661085	0.783883	5.02071			-0.00255177	-0.00425395	0.783892	5.02071
-0.00368343	-0.00554351	0.784119	5.04179			-0.00710857	-0.00868638	0.783489	5.02145			-0.00368343	-0.00554351	0.783463	5.02145
-0.00503068	-0.00707102	0.783792	5.04759			-0.00938498	-0.0110274	0.783058	5.02115			-0.00503068	-0.00707102	0.782977	5.02115
-0.00657117	-0.00881132	0.783424	5.05289			-0.0118877	-0.0135945	0.782598	5.01969			-0.00657117	-0.00881132	0.782445	5.01969
-0.00828103	-0.0107379	0.783022	5.05749			-0.0145817	-0.0163529	0.782115	5.01695			-0.00828103	-0.0107379	0.781875	5.01695
-0.0101371	-0.0128251	0.782592	5.06121			-0.0174365	-0.0192717	0.781617	5.01283			-0.0101371	-0.0128251	0.781275	5.01283
-0.0121178	-0.0150493	0.782139	5.06389			-0.0204232	-0.0223211	0.781108	5.00725			-0.0121178	-0.0150493	0.780652	5.00725
-0.014204	-0.0173891	0.781669	5.0654			-0.0235053	-0.0254615	0.780593	5.00016			-0.014204	-0.0173891	0.780013	5.00016
-0.0163788	-0.0198262	0.781186	5.06562			-0.026648	-0.0286542	0.780074	4.99157			-0.0163788	-0.0198262	0.779362	4.99157
-0.0186267	-0.022343	0.780693	5.06447			-0.0298251	-0.0318712	0.779554	4.98157			-0.0186267	-0.022343	0.778705	4.98157
-0.0209343	-0.0249246	0.780194	5.06186			-0.0330278	-0.0351043	0.779035	4.9701			-0.0209343	-0.0249246	0.778043	4.9701
-0.0232916	-0.0275601	0.779693	5.05773			-0.0362519	-0.0383509	0.778518	4.95712			-0.0232916	-0.0275601	0.777381	4.95712
-0.0256901	-0.03024	0.779189	5.05203			-0.0394941	-0.0416087	0.778005	4.94257			-0.0256901	-0.03024	0.776721	4.94257
-0.0281227	-0.0329567	0.778686	5.04472			-0.0427515	-0.0448755	0.777497	4.9264			-0.0281227	-0.0329567	0.776065	4.9264
-0.0305836	-0.0357036	0.778184	5.03575			-0.0460216	-0.0481498	0.776996	4.90857			-0.0305836	-0.0357036	0.775414	4.90857
-0.0330677	-0.0384753	0.777685	5.0251			-0.0492779	-0.051356	0.776552	4.88906			-0.0330677	-0.0384753	0.77477	4.88906
-0.0355712	-0.0412674	0.777189	5.01274			-0.0522866	-0.0542322	0.776187	4.86789			-0.0355712	-0.0412674	0.774134	4.86789
-0.0380907	-0.0440763	0.776697	4.99865			-0.0548038	-0.0565227	0.77592	4.84518			-0.0380907	-0.0440763	0.773507	4.84518
-0.0406235	-0.0468987	0.77621	4.98282			-0.0566433	-0.0580402	0.775756	4.82112			-0.0406235	-0.0468987	0.772889	4.82112
-0.043167	-0.0497321	0.775729	4.96538			-0.057751	-0.0587406	0.775689	4.79603			-0.043167	-0.0497321	0.772282	4.79603
-0.0457185	-0.0525731	0.775253	4.94694			-0.0582952	-0.0588135	0.775693	4.77041			-0.0457185	-0.0525731	0.771685	4.77041
-0.0482758	-0.0554194	0.774784	4.92803			-0.0584423	-0.0584439	0.775748	4.74466			-0.0482758	-0.0554194	0.7711	4.74466
-0.0508375	-0.0582692	0.774321	4.90905			-0.0583077	-0.0577595	0.77584	4.71906			-0.0508375	-0.0582692	0.770526	4.71906
-0.0534024	-0.0611215	0.773865	4.89026			-0.0579713	-0.0568494	0.775958	4.69382			-0.0534024	-0.0611215	0.769965	4.69382
-0.05597	-0.0639753	0.773416	4.87184			-0.0574892	-0.055776	0.776095	4.66908			-0.05597	-0.0639753	0.769415	4.66908
-0.0585397	-0.0668301	0.772974	4.85395			-0.0569007	-0.054583	0.776247	4.64494			-0.0585397	-0.0668301	0.768877	4.64494
-0.0611113	-0.0696856	0.772539	4.83667			-0.056234	-0.053302	0.776411	4.62148			-0.0611113	-0.0696856	0.768351	4.62148
-0.0636846	-0.0725414	0.772111	4.82008			-0.0555091	-0.0519551	0.776584	4.59875			-0.0636846	-0.0725414	0.767837	4.59875
-0.0662594	-0.0753972	0.77169	4.80423			-0.0547405	-0.0505587	0.776764	4.5768			-0.0662594	-0.0753972	0.767336	4.5768
-0.0688356	-0.0782531	0.771276	4.78911			-0.0539352	-0.0491207	0.776951	4.55561			-0.0688356	-0.0782531	0.766847	4.55561
-0.0714134	-0.0811089	0.77087	4.77453			-0.053088	-0.0476347	0.777145	4.53498			-0.0714134	-0.0811089	0.76637	4.53498
-0.0739927	-0.0839647	0.77047	4.7602			-0.0521958	-0.0460972	0.777347	4.51464			-0.0739927	-0.0839647	0.765905	4.51464
-0.0765753	-0.0868199	0.770087	4.7459			-0.0512597	-0.0445094	0.777558	4.49436			-0.0765753	-0.0868199	0.765463	4.49436
-0.0791637	-0.0896737	0.769732	4.73178			-0.0503068	-0.0429021	0.777796	4.47432			-0.0791637	-0.0896737	0.765052	4.47432
-0.081758	-0.0925256	0.769407	4.71799			-0.0493613	-0.0413043	0.778058	4.45467			-0.081758	-0.0925256	0.764676	4.45467
-0.084357	-0.0953759	0.769105	4.70468			-0.0484486	-0.0397432	0.778339	4.43553			-0.084357	-0.0953759	0.764328	4.43553
-0.0869598	-0.098225	0.768822	4.69196			-0.047584	-0.0382354	0.778631	4.41701			-0.0869598	-0.098225	0.764004	4.41701
-0.0895659	-0.101073	0.768555	4.6799			-0.0467706	-0.0367861	0.778927	4.39919			-0.0895659	-0.101073	0.7637	4.39919
-0.0921747	-0.10392	0.768301	4.66858			-0.0460069	-0.0353949	0.779223	4.3821			-0.0921747	-0.10392	0.763415	4.3821
-0.0947862	-0.106765	0.76806	4.65797			-0.0452928	-0.0340623	0.779518	4.36575			-0.0947862	-0.106765	0.763147	4.36575
-0.0974004	-0.10961	0.767832	4.64789			-0.0446306	-0.0327913	0.77981	4.34993			-0.0974004	-0.10961	0.762896	4.34993
-0.100017	-0.112454	0.767617	4.63806			-0.0440194	-0.0315809	0.780099	4.33437			-0.100017	-0.112454	0.762664	4.33437
-0.102619	-0.115263	0.767443	4.62829			-0.0434547	-0.030425	0.780392	4.31894			-0.102619	-0.115263	0.762472	4.31894
-0.105187	-0.118019	0.767308	4.61867			-0.0429234	-0.0293079	0.780699	4.30376			-0.105187	-0.118019	0.762314	4.30376
-0.107713	-0.120714	0.767204	4.60935			-0.0424117	-0.0282136	0.781025	4.289			-0.107713	-0.120714	0.762181	4.289
-0.110203	-0.123357	0.767123	4.60049			-0.0419087	-0.0271296	0.781367	4.27477			-0.110203	-0.123357	0.762066	4.27477
-0.112666	-0.125963	0.76706	4.59219			-0.0414061	-0.0260469	0.781721	4.26118			-0.112666	-0.125963	0.761959	4.26118
-0.115107	-0.128536	0.767009	4.58455			-0.0408986	-0.0249597	0.782083	4.24829			-0.115107	-0.128536	0.761856	4.24829
-0.117525	-0.131077	0.766966	4.57761			-0.0403826	-0.0238638	0.78245	4.23614			-0.117525	-0.131077	0.76175	4.23614
-0.119911	-0.133578	0.766926	4.57143			-0.0398556	-0.0227567	0.782821	4.22479			-0.119911	-0.133578	0.761637	4.22479
-0.122255	-0.136029	0.766888	4.56601			-0.039316	-0.0216368	0.783193	4.21424			-0.122255	-0.136029	0.761516	4.21424
-0.12455	-0.13842	0.766848	4.56136			-0.0387629	-0.0205026	0.783565	4.20454			-0.12455	-0.13842	0.761383	4.20454
-0.126786	-0.140742	0.766806	4.55748			-0.0381951	-0.0193533	0.783937	4.19568			-0.126786	-0.140742	0.761237	4.19568
-0.128955	-0.142985	0.766759	4.55435			-0.0376121	-0.018188	0.784309	4.18769			-0.128955	-0.142985	0.761074	4.18769
-0.131046	-0.145138	0.766706	4.55194			-0.0370129	-0.0170059	0.784679	4.18058			-0.131046	-0.145138	0.760893	4.18058
-0.13305	-0.147189	0.766643	4.5502			-0.0363969	-0.0158062	0.785046	4.17434			-0.13305	-0.147189	0.760689	4.17434
-0.134954	-0.149125	0.766569	4.5491			-0.0357632	-0.0145882	0.785412	4.16897			-0.134954	-0.149125	0.760459	4.16897
-0.136747	-0.150933	0.766481	4.54858			-0.0351112	-0.013351	0.785774	4.16446			-0.136747	-0.150933	0.7602	4.16446
-0.138417	-0.152601	0.766377	4.54856			-0.03444	-0.012094	0.786134	4.16075			-0.138417	-0.152601	0.759909	4.16075
-0.139952	-0.154114	0.766254	4.54898			-0.033749	-0.0108165	0.786489	4.15779			-0.139952	-0.154114	0.759583	4.15779
-0.141342	-0.155461	0.766111	4.54976			-0.0330374	-0.00951786	0.786841	4.15551			-0.141342	-0.155461	0.759218	4.15551
-0.142575	-0.156629	0.765945	4.55083			-0.0323047	-0.00819753	0.787189	4.15382			-0.142575	-0.156629	0.758811	4.15382
-0.143641	-0.157609	0.765754	4.55208			-0.0315504	-0.00685517	0.787532	4.15261			-0.143641	-0.157609	0.758361	4.15261
-0.144534	-0.158391	0.765538	4.55346			-0.0307742	-0.00549052	0.787871	4.15175			-0.144534	-0.158391	0.757866	4.15175
-0.145246	-0.158967	0.765295	4.55488			-0.0299757	-0.00410347	0.788205	4.15112			-0.145246	-0.158967	0.757324	4.15112
-0.145771	-0.159331	0.765024	4.55626			-0.029155	-0.00269409	0.788533	4.15058			-0.145771	-0.159331	0.756735	4.15058
-0.146107	-0.15948	0.764725	4.55756			-0.0283119	-0.0012626	0.788856	4.15			-0.146107	-0.15948	0.756099	4.15
-0.146251	-0.159411	0.764399	4.55871			-0.0274468	0.000190622	0.789174	4.14927			-0.146251	-0.159411	0.755416	4.14927
-0.146203	-0.159125	0.764046	4.55968			-0.0265598	0.00166502	0.789486	4.14829			-0.146203	-0.159125	0.754689	4.14829
-0.145965	-0.158621	0.763666	4.56043			-0.0256515	0.00315989	0.789793	4.14699			-0.145965	-0.158621	0.753919	4.14699
-0.14554	-0.157904	0.763263	4.56095			-0.0247223	0.00467439	0.790094	4.14533			-0.14554	-0.157904	0.753108	4.14533
-0.144931	-0.156976	0.762836	4.56124			-0.0237731	0.00620755	0.79039	4.14329			-0.144931	-0.156976	0.75226	4.14329
-0.144143	-0.155844	0.762388	4.56128			-0.0228044	0.00775828	0.79068	4.14089			-0.144143	-0.155844	0.751379	4.14089
-0.143183	-0.154513	0.761922	4.5611			-0.0218172	0.00932539	0.790964	4.13817			-0.143183	-0.154513	0.750467	4.13817
-0.142056	-0.15299	0.761439	4.56072			-0.0208124	0.0109076	0.791243	4.13517			-0.142056	-0.15299	0.749529	4.13517
-0.140769	-0.151284	0.760941	4.56015			-0.019791	0.0125036	0.791517	4.13197			-0.140769	-0.151284	0.748569	4.13197
-0.13933	-0.1494	0.760432	4.55942			-0.018754	0.014112	0.791786	4.12863			-0.13933	-0.1494	0.747592	4.12863
-0.137745	-0.147348	0.759912	4.55857			-0.0177025	0.0157314	0.792049	4.12522			-0.137745	-0.147348	0.7466	4.12522
-0.136023	-0.145134	0.759386	4.55762			-0.0166375	0.0173604	0.792308	4.12181			-0.136023	-0.145134	0.745598	4.12181
-0.134169	-0.142766	0.758854	4.55661			-0.0155602	0.0189974	0.792561	4.11847			-0.134169	-0.142766	0.744591	4.11847
-0.13219	-0.140253	0.75832	4.55555			-0.0144716	0.0206412	0.79281	4.11524			-0.13219	-0.140253	0.743582	4.11524
-0.130094	-0.1376	0.757785	4.55449			-0.0133728	0.0222902	0.793055	4.11216			-0.130094	-0.1376	0.742574	4.11216
-0.127885	-0.134815	0.757251	4.55343			-0.0122649	0.0239431	0.793294	4.10926			-0.127885	-0.134815	0.741572	4.10926
-0.12557	-0.131903	0.756721	4.55239			-0.0111488	0.0255985	0.79353	4.10657			-0.12557	-0.131903	0.740578	4.10657
-0.123154	-0.128872	0.756195	4.55141			-0.0100257	0.0272551	0.793761	4.10409			-0.123154	-0.128872	0.739596	4.10409
-0.120643	-0.125727	0.755677	4.55048			-0.00889648	0.0289116	0.793989	4.10182			-0.120643	-0.125727	0.738628	4.10182
-0.11804	-0.122472	0.755167	4.54962			-0.00776215	0.0305666	0.794212	4.09977			-0.11804	-0.122472	0.737678	4.09977
-0.115352	-0.119115	0.754667	4.54884			-0.00662365	0.0322191	0.794431	4.09792			-0.115352	-0.119115	0.736749	4.09792
-0.112581	-0.115659	0.754178	4.54813			-0.00548187	0.0338677	0.794646	4.09624			-0.112581	-0.115659	0.735842	4.09624
-0.109736	-0.112113	0.753703	4.54755			-0.00433769	0.0355118	0.794858	4.09478			-0.109736	-0.112113	0.734959	4.09478
-0.106835	-0.1085	0.753241	4.54726			-0.00319179	0.0371523	0.795068	4.09366			-0.106835	-0.1085	0.734101	4.09366
-0.103896	-0.104838	0.752791	4.54743			-0.00204463	0.0387902	0.795277	4.09305			-0.103896	-0.104838	0.733267	4.09305
-0.10093	-0.10114	0.752353	4.54817			-0.000896544	0.0404263	0.795485	4.09303			-0.10093	-0.10114	0.732457	4.09303
-0.0979436	-0.0974161	0.751929	4.54956			0.00025224	0.042061	0.795694	4.0937			-0.0979436	-0.0974161	0.731669	4.0937
-0.0949434	-0.093672	0.751516	4.55167			0.00140156	0.0436948	0.795904	4.09509			-0.0949434	-0.093672	0.730903	4.09509
-0.0919289	-0.08991	0.751117	4.55452			0.00255122	0.0453272	0.796114	4.09726			-0.0919289	-0.08991	0.73016	4.09726
-0.0888989	-0.086131	0.750732	4.55812			0.0037008	0.0469538	0.796324	4.10024			-0.0888989	-0.086131	0.729439	4.10024
-0.0858519	-0.0823353	0.750363	4.56244			0.0048498	0.0485697	0.796535	4.10405			-0.0858519	-0.0823353	0.72874	4.10405
-0.0827862	-0.078523	0.750009	4.56745			0.0059977	0.0501701	0.796744	4.1087			-0.0827862	-0.078523	0.728062	4.1087
-0.0796998	-0.0746944	0.749672	4.5731			0.00714387	0.0517497	0.796953	4.11421			-0.0796998	-0.0746944	0.727406	4.11421
-0.0765912	-0.0708497	0.749353	4.57934			0.00828765	0.0533032	0.79716	4.12058			-0.0765912	-0.0708497	0.726771	4.12058
-0.0734585	-0.0669894	0.749053	4.5861			0.00942826	0.0548255	0.797364	4.12779			-0.0734585	-0.0669894	0.726158	4.12779
-0.0703003	-0.0631142	0.748772	4.5933			0.0105649	0.0563113	0.797566	4.13581			-0.0703003	-0.0631142	0.725566	4.13581
-0.0671155	-0.0592253	0.748512	4.60085			0.0116967	0.0577556	0.797764	4.14457			-0.0671155	-0.0592253	0.724995	4.14457
-0.0639032	-0.0553239	0.748274	4.60867			0.0128226	0.0591536	0.797959	4.15399			-0.0639032	-0.0553239	0.724447	4.15399
-0.060663	-0.051412	0.748058	4.61665			0.0139418	0.0605008	0.798148	4.16398			-0.060663	-0.051412	0.723922	4.16398
-0.0573948	-0.0474915	0.747865	4.6247			0.0150533	0.0617929	0.798334	4.17442			-0.0573948	-0.0474915	0.723422	4.17442
-0.0540993	-0.0435648	0.747696	4.63273			0.016156	0.0630264	0.798513	4.18515			-0.0540993	-0.0435648	0.722948	4.18515
-0.0507771	-0.0396347	0.747552	4.64065			0.017249	0.0641979	0.798687	4.19603			-0.0507771	-0.0396347	0.722502	4.19603
-0.0474297	-0.0357039	0.747432	4.64839			0.0183313	0.0653046	0.798854	4.2069			-0.0474297	-0.0357039	0.722086	4.2069
-0.0440587	-0.0317753	0.747336	4.65587			0.0194019	0.0663443	0.799015	4.21759			-0.0440587	-0.0317753	0.7217	4.21759
-0.0406661	-0.0278521	0.747266	4.66305			0.02046	0.0673151	0.799169	4.22798			-0.0406661	-0.0278521	0.721346	4.22798
-0.0372541	-0.0239372	0.74722	4.66989			0.0215047	0.0682159	0.799316	4.23793			-0.0372541	-0.0239372	0.721027	4.23793
-0.0338252	-0.0200336	0.747199	4.67636			0.0225352	0.0690457	0.799456	4.24736			-0.0338252	-0.0200336	0.720744	4.24736
-0.030382	-0.0161442	0.747201	4.68245			0.0235508	0.0698041	0.799588	4.25623			-0.030382	-0.0161442	0.720497	4.25623
-0.0269271	-0.0122718	0.747228	4.68817			0.0245509	0.0704912	0.799713	4.26451			-0.0269271	-0.0122718	0.720288	4.26451
-0.0234633	-0.00841882	0.747277	4.69353			0.0255348	0.0711074	0.799829	4.27223			-0.0234633	-0.00841882	0.720118	4.27223
-0.0199932	-0.00458775	0.747349	4.69856			0.026502	0.0716534	0.799939	4.27944			-0.0199932	-0.00458775	0.719987	4.27944
-0.0165194	-0.000780773	0.747442	4.70329			0.0274521	0.0721301	0.80004	4.2862			-0.0165194	-0.000780773	0.719896	4.2862
-0.0130446	0.00300009	0.747557	4.70774			0.0283847	0.0725387	0.800134	4.2926			-0.0130446	0.00300009	0.719843	4.2926
-0.00957109	0.006753	0.747691	4.71197			0.0292995	0.0728807	0.800221	4.29873			-0.00957109	0.006753	0.719829	4.29873
-0.00610132	0.0104762	0.747845	4.71601			0.0301961	0.0731575	0.8003	4.30468			-0.00610132	0.0104762	0.719852	4.30468
-0.00263749	0.0141682	0.748018	4.71989			0.0310743	0.0733708	0.800372	4.31052			-0.00263749	0.0141682	0.719912	4.31052
0.000818237	0.0178274	0.748208	4.72365			0.031934	0.0735222	0.800437	4.31633			0.000818237	0.0178274	0.720007	4.31633
0.00426381	0.0214525	0.748416	4.72733			0.032775	0.0736135	0.800494	4.32217			0.00426381	0.0214525	0.720135	4.32217
0.00769725	0.0250421	0.74864	4.73095			0.0335971	0.0736463	0.800545	4.32809			0.00769725	0.0250421	0.720296	4.32809
0.0111166	0.0285949	0.748879	4.73454			0.0344002	0.0736224	0.800589	4.33411			0.0111166	0.0285949	0.720487	4.33411
0.0145201	0.0321096	0.749133	4.73811			0.0351843	0.0735435	0.800627	4.34026			0.0145201	0.0321096	0.720707	4.34026
0.0179058	0.0355849	0.749401	4.74169			0.0359492	0.0734112	0.800658	4.34654			0.0179058	0.0355849	0.720954	4.34654
0.0212719	0.0390194	0.749682	4.74528			0.0366949	0.0732271	0.800683	4.35296			0.0212719	0.0390194	0.721226	4.35296
0.0246167	0.0424118	0.749976	4.74889			0.0374212	0.0729927	0.800701	4.35949			0.0246167	0.0424118	0.721521	4.35949
0.0279383	0.0457608	0.750282	4.75252			0.0381282	0.0727096	0.800714	4.36613			0.0279383	0.0457608	0.721838	4.36613
0.0312349	0.049065	0.750599	4.75618			0.0388157	0.0723791	0.800721	4.37284			0.0312349	0.049065	0.722176	4.37284
0.0345047	0.052323	0.750926	4.75986			0.0394836	0.0720026	0.800723	4.37959			0.0345047	0.052323	0.722533	4.37959
0.0377459	0.0555334	0.751262	4.76356			0.040132	0.0715815	0.800719	4.38636			0.0377459	0.0555334	0.722908	4.38636
0.0409568	0.0586949	0.751608	4.76727			0.0407606	0.0711171	0.800709	4.39311			0.0409568	0.0586949	0.723299	4.39311
0.0441354	0.061806	0.751962	4.77099			0.0413695	0.0706105	0.800695	4.39981			0.0441354	0.061806	0.723705	4.39981
0.04728	0.0648654	0.752323	4.7747			0.0419586	0.0700631	0.800675	4.40643			0.04728	0.0648654	0.724124	4.40643
0.0503889	0.0678718	0.75269	4.77839			0.0425277	0.0694759	0.800651	4.41294			0.0503889	0.0678718	0.724557	4.41294
0.0534603	0.0708239	0.753063	4.78206			0.0430769	0.0688502	0.800622	4.41932			0.0534603	0.0708239	0.725001	4.41932
0.0564925	0.0737204	0.753442	4.7857			0.043606	0.068187	0.800588	4.42557			0.0564925	0.0737204	0.725455	4.42557
0.0594837	0.0765603	0.753824	4.7893			0.044115	0.0674874	0.80055	4.43167			0.0594837	0.0765603	0.725918	4.43167
0.0624325	0.0793424	0.754211	4.79284			0.0446037	0.0667527	0.800507	4.43761			0.0624325	0.0793424	0.726389	4.43761
0.0653372	0.0820657	0.7546	4.79633			0.0450723	0.0659838	0.80046	4.44341			0.0653372	0.0820657	0.726868	4.44341
0.0681964	0.0847293	0.754991	4.79976			0.0455205	0.0651818	0.80041	4.44907			0.0681964	0.0847293	0.727352	4.44907
0.0710086	0.0873323	0.755383	4.80313			0.0459485	0.0643478	0.800355	4.45461			0.0710086	0.0873323	0.727841	4.45461
0.0737725	0.089874	0.755777	4.80642			0.0463561	0.0634829	0.800296	4.46002			0.0737725	0.089874	0.728334	4.46002
0.0764868	0.0923537	0.75617	4.80964			0.0467434	0.0625881	0.800234	4.46534			0.0764868	0.0923537	0.72883	4.46534
0.0791503	0.0947709	0.756563	4.8128			0.0471103	0.0616646	0.800169	4.47058			0.0791503	0.0947709	0.729328	4.47058
0.0817619	0.0971249	0.756954	4.81588			0.0474569	0.0607133	0.8001	4.47574			0.0817619	0.0971249	0.729826	4.47574
0.0843205	0.0994154	0.757344	4.81889			0.0477832	0.0597354	0.800028	4.48086			0.0843205	0.0994154	0.730324	4.48086
0.0868252	0.101642	0.757731	4.82183			0.0480893	0.0587319	0.799953	4.48593			0.0868252	0.101642	0.730821	4.48593
0.089275	0.103804	0.758116	4.82471			0.0483751	0.0577039	0.799875	4.49097			0.089275	0.103804	0.731316	4.49097
0.0916692	0.105903	0.758497	4.82752			0.0486407	0.0566523	0.799795	4.49598			0.0916692	0.105903	0.731808	4.49598
0.0940069	0.107936	0.758874	4.83028			0.0488863	0.0555783	0.799712	4.50098			0.0940069	0.107936	0.732297	4.50098
0.0962874	0.109905	0.759246	4.83298			0.049112	0.054483	0.799626	4.50596			0.0962874	0.109905	0.732781	4.50596
0.0985101	0.111808	0.759614	4.83563			0.0493177	0.0533673	0.799538	4.51094			0.0985101	0.111808	0.73326	4.51094
0.100674	0.113647	0.759976	4.83823			0.0495037	0.0522322	0.799449	4.51589			0.100674	0.113647	0.733733	4.51589
0.102779	0.115421	0.760333	4.84079			0.04967	0.0510789	0.799357	4.52083			0.102779	0.115421	0.7342	4.52083
0.104825	0.117131	0.760683	4.8433			0.0498169	0.0499083	0.799263	4.52575			0.104825	0.117131	0.73466	4.52575
0.106811	0.118775	0.761027	4.84578			0.0499443	0.0487214	0.799167	4.53064			0.106811	0.118775	0.735112	4.53064
0.108736	0.120354	0.761365	4.84823			0.0500526	0.0475192	0.79907	4.53549			0.108736	0.120354	0.735557	4.53549
0.1106	0.121869	0.761695	4.85064			0.0501418	0.0463027	0.798972	4.54031			0.1106	0.121869	0.735993	4.54031
0.112403	0.123319	0.762018	4.85302			0.0502122	0.0450729	0.798872	4.54508			0.112403	0.123319	0.736421	4.54508
0.114144	0.124705	0.762333	4.85537			0.0502638	0.0438307	0.798771	4.54981			0.114144	0.124705	0.73684	4.54981
0.115823	0.126026	0.76264	4.85769			0.0502969	0.0425771	0.798669	4.55448			0.115823	0.126026	0.737249	4.55448
0.117441	0.127284	0.76294	4.85999			0.0503117	0.0413129	0.798566	4.55909			0.117441	0.127284	0.737648	4.55909
0.118996	0.128477	0.763231	4.86225			0.0503083	0.0400392	0.798463	4.56364			0.118996	0.128477	0.738038	4.56364
0.120488	0.129606	0.763513	4.86449			0.050287	0.0387568	0.798358	4.56814			0.120488	0.129606	0.738418	4.56814
0.121917	0.130672	0.763787	4.86671			0.050248	0.0374665	0.798253	4.57257			0.121917	0.130672	0.738788	4.57257
0.123284	0.131675	0.764052	4.86889			0.0501914	0.0361694	0.798148	4.57693			0.123284	0.131675	0.739148	4.57693
0.124588	0.132614	0.764308	4.87105			0.0501176	0.0348662	0.798042	4.58124			0.124588	0.132614	0.739497	4.58124
0.125829	0.133491	0.764556	4.87318			0.0500267	0.0335578	0.797936	4.5855			0.125829	0.133491	0.739836	4.5855
0.127006	0.134306	0.764794	4.87528			0.0499189	0.0322449	0.797829	4.58969			0.127006	0.134306	0.740164	4.58969
0.128121	0.135058	0.765023	4.87735			0.0497944	0.0309286	0.797723	4.59384			0.128121	0.135058	0.740482	4.59384
0.129173	0.135749	0.765244	4.8794			0.0496536	0.0296094	0.797617	4.59793			0.129173	0.135749	0.74079	4.59793
0.130163	0.136379	0.765455	4.88141			0.0494966	0.0282882	0.79751	4.60198			0.130163	0.136379	0.741087	4.60198
0.13109	0.136947	0.765657	4.8834			0.0493237	0.0269659	0.797404	4.60599			0.13109	0.136947	0.741374	4.60599
0.131954	0.137456	0.76585	4.88535			0.0491351	0.0256431	0.797299	4.60996			0.131954	0.137456	0.74165	4.60996
0.132757	0.137904	0.766034	4.88727			0.0489311	0.0243205	0.797193	4.61389			0.132757	0.137904	0.741917	4.61389
0.133497	0.138293	0.766209	4.88916			0.0487118	0.022999	0.797088	4.61778			0.133497	0.138293	0.742173	4.61778
0.134176	0.138623	0.766376	4.89103			0.0484777	0.0216793	0.796984	4.62165			0.134176	0.138623	0.74242	4.62165
0.134794	0.138895	0.766534	4.89286			0.0482288	0.020362	0.79688	4.62547			0.134794	0.138895	0.742658	4.62547
0.135352	0.139109	0.766683	4.89466			0.0479656	0.0190478	0.796777	4.62927			0.135352	0.139109	0.742886	4.62927
0.135849	0.139266	0.766824	4.89643			0.0476881	0.0177374	0.796674	4.63304			0.135849	0.139266	0.743105	4.63304
0.136286	0.139366	0.766956	4.89817			0.0473968	0.0164314	0.796572	4.63677			0.136286	0.139366	0.743315	4.63677
0.136663	0.139411	0.767081	4.89988			0.0470918	0.0151306	0.796471	4.64047			0.136663	0.139411	0.743516	4.64047
0.136982	0.1394	0.767198	4.90156			0.0467735	0.0138355	0.796371	4.64414			0.136982	0.1394	0.743709	4.64414
0.137243	0.139334	0.767307	4.90322			0.046442	0.0125467	0.796271	4.64777			0.137243	0.139334	0.743894	4.64777
0.137446	0.139215	0.767409	4.90485			0.0460978	0.0112649	0.796173	4.65137			0.137446	0.139215	0.744072	4.65137
0.137592	0.139042	0.767503	4.90645			0.045741	0.00999061	0.796076	4.65493			0.137592	0.139042	0.744242	4.65493
0.137681	0.138817	0.767591	4.90802			0.0453719	0.00872441	0.795979	4.65846			0.137681	0.138817	0.744405	4.65846
0.137714	0.13854	0.767671	4.90957			0.0449909	0.00746686	0.795884	4.66195			0.137714	0.13854	0.744562	4.66195
0.137693	0.138212	0.767746	4.91109			0.0445981	0.0062185	0.79579	4.66541			0.137693	0.138212	0.744712	4.66541
0.137616	0.137834	0.767814	4.91259			0.0441939	0.00497986	0.795696	4.66882			0.137616	0.137834	0.744857	4.66882
0.137486	0.137406	0.767876	4.91406			0.0437786	0.00375144	0.795604	4.6722			0.137486	0.137406	0.744995	4.6722
0.137303	0.136929	0.767932	4.91551			0.0433523	0.00253375	0.795513	4.67555			0.137303	0.136929	0.745129	4.67555
0.137068	0.136405	0.767983	4.91694			0.0429156	0.00132726	0.795424	4.67885			0.137068	0.136405	0.745258	4.67885
0.136781	0.135834	0.768029	4.91835			0.0424685	0.000132448	0.795335	4.68212			0.136781	0.135834	0.745383	4.68212
0.136444	0.135216	0.76807	4.91973			0.0420114	-0.00105024	0.795248	4.68536			0.136444	0.135216	0.745504	4.68536
0.136056	0.134553	0.768106	4.92109			0.0415447	-0.00222037	0.795161	4.68856			0.136056	0.134553	0.745621	4.68856
0.135619	0.133845	0.768139	4.92242			0.0410685	-0.00337751	0.795076	4.69172			0.135619	0.133845	0.745735	4.69172
0.135134	0.133093	0.768167	4.92374			0.0405831	-0.00452125	0.794993	4.69485			0.135134	0.133093	0.745847	4.69485
0.134602	0.132299	0.768192	4.92504			0.040089	-0.00565121	0.79491	4.69795			0.134602	0.132299	0.745956	4.69795
0.134022	0.131462	0.768213	4.92631			0.0395862	-0.00676699	0.794829	4.70102			0.134022	0.131462	0.746063	4.70102
0.133397	0.130584	0.768231	4.92756			0.0390752	-0.00786824	0.794749	4.70405			0.133397	0.130584	0.746168	4.70405
0.132727	0.129666	0.768246	4.9288			0.0385563	-0.0089546	0.79467	4.70706			0.132727	0.129666	0.746273	4.70706
0.132013	0.128709	0.768259	4.93001			0.0380296	-0.0100257	0.794592	4.71003			0.132013	0.128709	0.746376	4.71003
0.131255	0.127713	0.76827	4.9312			0.0374956	-0.0110813	0.794516	4.71298			0.131255	0.127713	0.746479	4.71298
0.130456	0.126679	0.768279	4.93238			0.0369544	-0.012121	0.79444	4.71589			0.130456	0.126679	0.746583	4.71589
0.129614	0.125609	0.768286	4.93353			0.0364064	-0.0131446	0.794366	4.71878			0.129614	0.125609	0.746686	4.71878
0.128732	0.124502	0.768292	4.93466			0.0358519	-0.0141517	0.794293	4.72164			0.128732	0.124502	0.74679	4.72164
0.127811	0.123361	0.768297	4.93578			0.0352912	-0.0151421	0.794221	4.72448			0.127811	0.123361	0.746896	4.72448
0.126851	0.122186	0.768301	4.93687			0.0347245	-0.0161155	0.794151	4.72728			0.126851	0.122186	0.747002	4.72728
0.125852	0.120978	0.768305	4.93795			0.0341521	-0.0170718	0.794081	4.73006			0.125852	0.120978	0.74711	4.73006
0.124817	0.119738	0.768309	4.93901			0.0335743	-0.0180105	0.794013	4.73281			0.124817	0.119738	0.747221	4.73281
0.123746	0.118466	0.768312	4.94005			0.0329914	-0.0189316	0.793945	4.73553			0.123746	0.118466	0.747333	4.73553
0.12264	0.117165	0.768316	4.94107			0.0324036	-0.0198349	0.793879	4.73823			0.12264	0.117165	0.747449	4.73823
0.121499	0.115834	0.76832	4.94207			0.0318113	-0.02072	0.793814	4.7409			0.121499	0.115834	0.747567	4.7409
0.120326	0.114474	0.768326	4.94306			0.0312148	-0.021587	0.793749	4.74354			0.120326	0.114474	0.747688	4.74354
0.11912	0.113087	0.768332	4.94403			0.0306142	-0.0224355	0.793686	4.74615			0.11912	0.113087	0.747813	4.74615
0.117882	0.111674	0.768339	4.94498			0.0300099	-0.0232654	0.793623	4.74874			0.117882	0.111674	0.747941	4.74874
0.116614	0.110235	0.768348	4.94591			0.0294021	-0.0240767	0.793562	4.7513			0.116614	0.110235	0.748074	4.7513
0.115316	0.108771	0.768359	4.94683			0.0287912	-0.024869	0.793501	4.75384			0.115316	0.108771	0.748211	4.75384
0.11399	0.107284	0.768371	4.94773			0.0281773	-0.0256425	0.793442	4.75634			0.11399	0.107284	0.748352	4.75634
0.112636	0.105774	0.768386	4.94862			0.0275607	-0.0263968	0.793383	4.75883			0.112636	0.105774	0.748497	4.75883
0.111255	0.104242	0.768403	4.94949			0.0269418	-0.027132	0.793325	4.76128			0.111255	0.104242	0.748648	4.76128
0.109848	0.102689	0.768422	4.95034			0.0263207	-0.0278479	0.793268	4.76371			0.109848	0.102689	0.748803	4.76371
0.108416	0.101116	0.768444	4.95118			0.0256978	-0.0285445	0.793211	4.76612			0.108416	0.101116	0.748963	4.76612
0.106959	0.099524	0.768469	4.95201			0.0250732	-0.0292217	0.793155	4.7685			0.106959	0.099524	0.749129	4.7685
0.10548	0.0979138	0.768496	4.95282			0.0244472	-0.0298795	0.7931	4.77086			0.10548	0.0979138	0.7493	4.77086
0.103978	0.0962864	0.768527	4.95361			0.0238202	-0.0305177	0.793046	4.77319			0.103978	0.0962864	0.749477	4.77319
0.102455	0.0946425	0.768561	4.95439			0.0231922	-0.0311364	0.792992	4.7755			0.102455	0.0946425	0.749659	4.7755
0.100911	0.0929833	0.768598	4.95516			0.0225636	-0.0317356	0.792939	4.77779			0.100911	0.0929833	0.749847	4.77779
0.0993473	0.0913095	0.768639	4.95591			0.0219346	-0.0323152	0.792887	4.78005			0.0993473	0.0913095	0.750041	4.78005
0.0977649	0.089622	0.768683	4.95665			0.0213055	-0.0328753	0.792835	4.78229			0.0977649	0.089622	0.750241	4.78229
0.0961645	0.0879217	0.768731	4.95738			0.0206764	-0.0334158	0.792783	4.78451			0.0961645	0.0879217	0.750447	4.78451
0.094547	0.0862095	0.768783	4.95809			0.0200476	-0.0339367	0.792732	4.7867			0.094547	0.0862095	0.750659	4.7867
0.0929133	0.0844863	0.768838	4.95879			0.0194194	-0.0344382	0.792682	4.78888			0.0929133	0.0844863	0.750876	4.78888
0.0912642	0.0827529	0.768898	4.95948			0.0187919	-0.0349201	0.792632	4.79103			0.0912642	0.0827529	0.7511	4.79103
0.0896005	0.0810101	0.768961	4.96015			0.0181654	-0.0353827	0.792582	4.79316			0.0896005	0.0810101	0.75133	4.79316
0.0879231	0.0792589	0.769029	4.96082			0.0175402	-0.0358258	0.792533	4.79527			0.0879231	0.0792589	0.751566	4.79527
0.0862328	0.0775001	0.7691	4.96147			0.0169163	-0.0362496	0.792484	4.79735			0.0862328	0.0775001	0.751808	4.79735
0.0845305	0.0757344	0.769176	4.96211			0.016294	-0.0366542	0.792435	4.79942			0.0845305	0.0757344	0.752056	4.79942
0.0828169	0.0739627	0.769255	4.96274			0.0156736	-0.0370396	0.792387	4.80147			0.0828169	0.0739627	0.75231	4.80147
0.0810928	0.0721859	0.769339	4.96335			0.0150552	-0.037406	0.792339	4.80349			0.0810928	0.0721859	0.75257	4.80349
0.0793592	0.0704046	0.769427	4.96396			0.014439	-0.0377533	0.792291	4.80549			0.0793592	0.0704046	0.752836	4.80549
0.0776167	0.0686198	0.769519	4.96455			0.0138253	-0.0380817	0.792243	4.80748			0.0776167	0.0686198	0.753108	4.80748
0.0758661	0.0668321	0.769615	4.96514			0.0132142	-0.0383914	0.792196	4.80944			0.0758661	0.0668321	0.753386	4.80944
0.0741083	0.0650424	0.769716	4.96571			0.0126059	-0.0386824	0.792149	4.81138			0.0741083	0.0650424	0.753669	4.81138
0.072344	0.0632514	0.76982	4.96628			0.0120006	-0.0389549	0.792102	4.81331			0.072344	0.0632514	0.753958	4.81331
0.0705739	0.0614598	0.769929	4.96683			0.0113984	-0.0392089	0.792055	4.81521			0.0705739	0.0614598	0.754252	4.81521
0.0687988	0.0596684	0.770042	4.96737			0.0107997	-0.0394447	0.792008	4.81709			0.0687988	0.0596684	0.754552	4.81709
0.0670195	0.0578779	0.770159	4.96791			0.0102044	-0.0396624	0.791961	4.81896			0.0670195	0.0578779	0.754856	4.81896
0.0652366	0.056089	0.770279	4.96843			0.00961283	-0.039862	0.791914	4.82081			0.0652366	0.056089	0.755166	4.82081
0.063451	0.0543025	0.770404	4.96894			0.00902512	-0.0400439	0.791868	4.82263			0.063451	0.0543025	0.755481	4.82263
0.0616633	0.0525189	0.770533	4.96945			0.00844143	-0.0402081	0.791821	4.82444			0.0616633	0.0525189	0.755801	4.82444
0.0598742	0.050739	0.770665	4.96994			0.00786191	-0.0403548	0.791775	4.82623			0.0598742	0.050739	0.756126	4.82623
0.0580845	0.0489635	0.770801	4.97043			0.00728672	-0.0404842	0.791728	4.828			0.0580845	0.0489635	0.756455	4.828
0.0562948	0.047193	0.770941	4.97091			0.00671602	-0.0405964	0.791682	4.82976			0.0562948	0.047193	0.756789	4.82976
0.0545058	0.0454281	0.771084	4.97138			0.00614993	-0.0406917	0.791635	4.83149			0.0545058	0.0454281	0.757126	4.83149
0.0527183	0.0436694	0.771231	4.97184			0.00558861	-0.0407703	0.791589	4.83321			0.0527183	0.0436694	0.757468	4.83321
0.0509327	0.0419177	0.771381	4.9723			0.0050322	-0.0408322	0.791542	4.83491			0.0509327	0.0419177	0.757814	4.83491
0.0491499	0.0401734	0.771535	4.97274			0.00448082	-0.0408778	0.791495	4.83659			0.0491499	0.0401734	0.758163	4.83659
0.0473704	0.0384371	0.771692	4.97318			0.00393461	-0.0409073	0.791449	4.83826			0.0473704	0.0384371	0.758516	4.83826
0.0455948	0.0367095	0.771852	4.97361			0.00339369	-0.0409207	0.791402	4.83991			0.0455948	0.0367095	0.758873	4.83991
0.0438239	0.0349911	0.772015	4.97403			0.00285818	-0.0409184	0.791355	4.84154			0.0438239	0.0349911	0.759232	4.84154
0.0420582	0.0332824	0.772181	4.97445			0.0023282	-0.0409006	0.791308	4.84316			0.0420582	0.0332824	0.759595	4.84316
0.0402983	0.031584	0.772349	4.97486			0.00180387	-0.0408675	0.791261	4.84476			0.0402983	0.031584	0.75996	4.84476
0.0385448	0.0298964	0.772521	4.97526			0.00128529	-0.0408193	0.791213	4.84634			0.0385448	0.0298964	0.760328	4.84634
0.0367983	0.0282201	0.772695	4.97565			0.000772571	-0.0407562	0.791166	4.84791			0.0367983	0.0282201	0.760698	4.84791
0.0350594	0.0265556	0.772871	4.97604			0.000265813	-0.0406785	0.791118	4.84946			0.0350594	0.0265556	0.76107	4.84946
0.0333286	0.0249033	0.77305	4.97642			-0.000234887	-0.0405864	0.791071	4.85099			0.0333286	0.0249033	0.761445	4.85099
0.0316064	0.0232639	0.773231	4.9768			-0.000729433	-0.0404801	0.791023	4.85251			0.0316064	0.0232639	0.761821	4.85251
0.0298935	0.0216376	0.773414	4.97716			-0.00121774	-0.0403599	0.790975	4.85402			0.0298935	0.0216376	0.762199	4.85402
0.0281903	0.0200249	0.773599	4.97753			-0.00169971	-0.040226	0.790927	4.8555			0.0281903	0.0200249	0.762578	4.8555
0.0264974	0.0184264	0.773786	4.97788			-0.00217527	-0.0400787	0.790879	4.85698			0.0264974	0.0184264	0.762958	4.85698
0.0248152	0.0168423	0.773974	4.97823			-0.00264434	-0.0399182	0.790831	4.85844			0.0248152	0.0168423	0.76334	4.85844
0.0231443	0.0152731	0.774164	4.97858			-0.00310684	-0.0397448	0.790783	4.85988			0.0231443	0.0152731	0.763722	4.85988
0.0214852	0.0137192	0.774356	4.97891			-0.0035627	-0.0395587	0.790734	4.86131			0.0214852	0.0137192	0.764104	4.86131
0.0198383	0.012181	0.774549	4.97925			-0.00401186	-0.0393601	0.790685	4.86272			0.0198383	0.012181	0.764488	4.86272
0.0182041	0.0106588	0.774743	4.97957			-0.00445425	-0.0391494	0.790637	4.86412			0.0182041	0.0106588	0.764871	4.86412
0.016583	0.00915291	0.774938	4.9799			-0.0048898	-0.0389267	0.790588	4.86551			0.016583	0.00915291	0.765254	4.86551
0.0149755	0.00766376	0.775134	4.98021			-0.00531848	-0.0386923	0.790539	4.86688			0.0149755	0.00766376	0.765637	4.86688
0.0133821	0.00619165	0.77533	4.98052			-0.00574021	-0.0384466	0.79049	4.86824			0.0133821	0.00619165	0.76602	4.86824
0.011803	0.00473688	0.775528	4.98083			-0.00615495	-0.0381897	0.79044	4.86958			0.011803	0.00473688	0.766402	4.86958
0.0102389	0.00329975	0.775726	4.98113			-0.00656265	-0.0379219	0.790391	4.87091			0.0102389	0.00329975	0.766783	4.87091
0.00868991	0.00188056	0.775924	4.98143			-0.00696327	-0.0376435	0.790342	4.87222			0.00868991	0.00188056	0.767164	4.87222
0.00715659	0.000479575	0.776123	4.98172			-0.00735678	-0.0373547	0.790292	4.87353			0.00715659	0.000479575	0.767543	4.87353
0.00563927	-0.000902941	0.776322	4.98201			-0.00774313	-0.0370558	0.790243	4.87482			0.00563927	-0.000902941	0.767921	4.87482
0.0041383	-0.00226674	0.776521	4.98229			-0.00812229	-0.0367471	0.790193	4.87609			0.0041383	-0.00226674	0.768297	4.87609
0.00265405	-0.00361157	0.776719	4.98257			-0.00849424	-0.0364288	0.790143	4.87736			0.00265405	-0.00361157	0.768672	4.87736
0.00118684	-0.00493723	0.776918	4.98285			-0.00885894	-0.0361012	0.790093	4.87861			0.00118684	-0.00493723	0.769045	4.87861
-0.000262988	-0.00624348	0.777116	4.98312			-0.00921638	-0.0357645	0.790043	4.87984			-0.000262988	-0.00624348	0.769416	4.87984
-0.00169512	-0.00753013	0.777314	4.98338			-0.00956653	-0.0354191	0.789994	4.88107			-0.00169512	-0.00753013	0.769785	4.88107
-0.00310927	-0.00879698	0.777511	4.98364			-0.00990937	-0.0350651	0.789944	4.88228			-0.00310927	-0.00879698	0.770152	4.88228
-0.00450512	-0.0100439	0.777708	4.9839			-0.0102449	-0.0347029	0.789894	4.88348			-0.00450512	-0.0100439	0.770516	4.88348
-0.00588239	-0.0112706	0.777904	4.98415			-0.0105731	-0.0343327	0.789844	4.88467			-0.00588239	-0.0112706	0.770877	4.88467
-0.00724083	-0.012477	0.778098	4.9844			-0.010894	-0.0339548	0.789794	4.88584			-0.00724083	-0.012477	0.771236	4.88584
-0.00858017	-0.013663	0.778292	4.98465			-0.0112075	-0.0335694	0.789744	4.887			-0.00858017	-0.013663	0.771592	4.887
-0.00990016	-0.0148284	0.778485	4.98489			-0.0115137	-0.0331768	0.789694	4.88816			-0.00990016	-0.0148284	0.771945	4.88816
-0.0112006	-0.0159731	0.778677	4.98513			-0.0118125	-0.0327772	0.789644	4.8893			-0.0112006	-0.0159731	0.772295	4.8893
-0.0124812	-0.017097	0.778867	4.98537			-0.012104	-0.032371	0.789594	4.89042			-0.0124812	-0.017097	0.772642	4.89042
-0.0137417	-0.0181999	0.779056	4.9856			-0.0123882	-0.0319583	0.789545	4.89154			-0.0137417	-0.0181999	0.772985	4.89154
-0.0149821	-0.0192818	0.779244	4.98583			-0.0126651	-0.0315395	0.789495	4.89265			-0.0149821	-0.0192818	0.773325	4.89265
-0.016202	-0.0203426	0.77943	4.98605			-0.0129346	-0.0311148	0.789445	4.89374			-0.016202	-0.0203426	0.773661	4.89374
-0.0174014	-0.0213822	0.779614	4.98627			-0.0131969	-0.0306844	0.789396	4.89482			-0.0174014	-0.0213822	0.773994	4.89482
-0.01858	-0.0224006	0.779797	4.98649			-0.0134519	-0.0302486	0.789346	4.89589			-0.01858	-0.0224006	0.774323	4.89589
-0.0197376	-0.0233977	0.779978	4.98671			-0.0136996	-0.0298076	0.789297	4.89695			-0.0197376	-0.0233977	0.774647	4.89695
-0.0208742	-0.0243734	0.780156	4.98692			-0.0139401	-0.0293618	0.789248	4.898			-0.0208742	-0.0243734	0.774968	4.898
-0.0219896	-0.0253277	0.780333	4.98713			-0.0141733	-0.0289113	0.789198	4.89904			-0.0219896	-0.0253277	0.775285	4.89904
-0.0230837	-0.0262607	0.780508	4.98733			-0.0143994	-0.0284564	0.789149	4.90007			-0.0230837	-0.0262607	0.775598	4.90007
-0.0241563	-0.0271722	0.780681	4.98754			-0.0146184	-0.0279973	0.789101	4.90109			-0.0241563	-0.0271722	0.775907	4.90109
-0.0252074	-0.0280623	0.780852	4.98774			-0.0148302	-0.0275343	0.789052	4.9021			-0.0252074	-0.0280623	0.776211	4.9021
-0.0262368	-0.0289309	0.78102	4.98793			-0.0150349	-0.0270676	0.789004	4.90309			-0.0262368	-0.0289309	0.776511	4.90309
-0.0272445	-0.0297781	0.781187	4.98813			-0.0152325	-0.0265975	0.788955	4.90408			-0.0272445	-0.0297781	0.776807	4.90408
-0.0282304	-0.0306039	0.781351	4.98832			-0.0154232	-0.0261242	0.788907	4.90506			-0.0282304	-0.0306039	0.777098	4.90506
-0.0291945	-0.0314084	0.781512	4.98851			-0.0156068	-0.0256479	0.788859	4.90602			-0.0291945	-0.0314084	0.777385	4.90602
-0.0301367	-0.0321914	0.781671	4.98869			-0.0157836	-0.0251689	0.788812	4.90698			-0.0301367	-0.0321914	0.777667	4.90698
-0.0310569	-0.0329532	0.781828	4.98888			-0.0159534	-0.0246874	0.788764	4.90793			-0.0310569	-0.0329532	0.777944	4.90793
-0.0319551	-0.0336937	0.781982	4.98906			-0.0161164	-0.0242036	0.788717	4.90886			-0.0319551	-0.0336937	0.778217	4.90886
-0.0328313	-0.034413	0.782134	4.98924			-0.0162726	-0.0237177	0.78867	4.90979			-0.0328313	-0.034413	0.778486	4.90979
-0.0336855	-0.0351112	0.782283	4.98941			-0.016422	-0.02323	0.788624	4.91071			-0.0336855	-0.0351112	0.77875	4.91071
-0.0345177	-0.0357883	0.78243	4.98959			-0.0165648	-0.0227407	0.788577	4.91162			-0.0345177	-0.0357883	0.779009	4.91162
-0.0353279	-0.0364444	0.782574	4.98976			-0.0167009	-0.02225	0.788531	4.91252			-0.0353279	-0.0364444	0.779263	4.91252
-0.0361161	-0.0370796	0.782715	4.98993			-0.0168304	-0.0217582	0.788485	4.91341			-0.0361161	-0.0370796	0.779513	4.91341
-0.0368823	-0.037694	0.782853	4.99009			-0.0169534	-0.0212653	0.78844	4.91429			-0.0368823	-0.037694	0.779758	4.91429
-0.0376265	-0.0382877	0.782989	4.99026			-0.0170698	-0.0207717	0.788395	4.91516			-0.0376265	-0.0382877	0.779998	4.91516
-0.0383489	-0.0388607	0.783123	4.99042			-0.0171799	-0.0202776	0.78835	4.91603			-0.0383489	-0.0388607	0.780234	4.91603
-0.0390494	-0.0394133	0.783253	4.99058			-0.0172836	-0.0197831	0.788305	4.91688			-0.0390494	-0.0394133	0.780464	4.91688
-0.0397281	-0.0399455	0.783381	4.99073			-0.0173811	-0.0192884	0.788261	4.91773			-0.0397281	-0.0399455	0.780691	4.91773
-0.040385	-0.0404575	0.783506	4.99089			-0.0174723	-0.0187938	0.788217	4.91857			-0.040385	-0.0404575	0.780912	4.91857
-0.0410204	-0.0409493	0.783628	4.99104			-0.0175573	-0.0182994	0.788174	4.91939			-0.0410204	-0.0409493	0.781129	4.91939
-0.0416341	-0.0414211	0.783748	4.99119			-0.0176362	-0.0178055	0.788131	4.92022			-0.0416341	-0.0414211	0.781341	4.92022
-0.0422264	-0.0418731	0.783865	4.99134			-0.0177091	-0.0173122	0.788088	4.92103			-0.0422264	-0.0418731	0.781549	4.92103
-0.0427973	-0.0423054	0.783979	4.99149			-0.0177761	-0.0168196	0.788046	4.92183			-0.0427973	-0.0423054	0.781751	4.92183
-0.043347	-0.0427182	0.78409	4.99163			-0.0178371	-0.0163281	0.788004	4.92263			-0.043347	-0.0427182	0.78195	4.92263
-0.0438754	-0.0431115	0.784199	4.99177			-0.0178923	-0.0158377	0.787962	4.92341			-0.0438754	-0.0431115	0.782144	4.92341
-0.0443829	-0.0434857	0.784305	4.99191			-0.0179418	-0.0153487	0.787921	4.92419			-0.0443829	-0.0434857	0.782333	4.92419
-0.0448694	-0.0438407	0.784408	4.99205			-0.0179856	-0.0148612	0.78788	4.92496			-0.0448694	-0.0438407	0.782518	4.92496
-0.0453352	-0.0441769	0.784509	4.99219			-0.0180237	-0.0143753	0.78784	4.92573			-0.0453352	-0.0441769	0.782698	4.92573
-0.0457803	-0.0444944	0.784606	4.99232			-0.0180564	-0.0138913	0.7878	4.92648			-0.0457803	-0.0444944	0.782874	4.92648
-0.046205	-0.0447933	0.784702	4.99245			-0.0180836	-0.0134093	0.78776	4.92723			-0.046205	-0.0447933	0.783046	4.92723
-0.0466093	-0.045074	0.784794	4.99258			-0.0181054	-0.0129295	0.787721	4.92797			-0.0466093	-0.045074	0.783213	4.92797
-0.0469934	-0.0453364	0.784884	4.99271			-0.0181219	-0.012452	0.787682	4.92871			-0.0469934	-0.0453364	0.783376	4.92871
-0.0473576	-0.0455809	0.784972	4.99284			-0.0181332	-0.0119769	0.787644	4.92943			-0.0473576	-0.0455809	0.783535	4.92943
-0.0477019	-0.0458076	0.785057	4.99296			-0.0181393	-0.0115045	0.787606	4.93015			-0.0477019	-0.0458076	0.78369	4.93015
-0.0480265	-0.0460168	0.785139	4.99308			-0.0181404	-0.0110349	0.787569	4.93086			-0.0480265	-0.0460168	0.78384	4.93086
-0.0483317	-0.0462086	0.785219	4.9932			-0.0181365	-0.0105681	0.787532	4.93156			-0.0483317	-0.0462086	0.783987	4.93156
-0.0486175	-0.0463833	0.785296	4.99332			-0.0181277	-0.0101044	0.787495	4.93226			-0.0486175	-0.0463833	0.784129	4.93226
-0.0488843	-0.046541	0.785371	4.99344			-0.0181141	-0.00964387	0.787459	4.93295			-0.0488843	-0.046541	0.784268	4.93295
-0.0491322	-0.046682	0.785444	4.99356			-0.0180957	-0.00918665	0.787424	4.93363			-0.0491322	-0.046682	0.784403	4.93363
-0.0493614	-0.0468065	0.785514	4.99367			-0.0180727	-0.00873288	0.787389	4.93431			-0.0493614	-0.0468065	0.784534	4.93431
-0.0495721	-0.0469147	0.785582	4.99378			-0.0180451	-0.00828266	0.787354	4.93498			-0.0495721	-0.0469147	0.784661	4.93498
-0.0497645	-0.0470068	0.785648	4.99389			-0.018013	-0.00783613	0.78732	4.93564			-0.0497645	-0.0470068	0.784785	4.93564
-0.0499389	-0.0470831	0.785711	4.994			-0.0179764	-0.00739341	0.787286	4.93629			-0.0499389	-0.0470831	0.784905	4.93629
-0.0500954	-0.0471438	0.785772	4.99411			-0.0179356	-0.0069546	0.787252	4.93694			-0.0500954	-0.0471438	0.785022	4.93694
-0.0502343	-0.0471891	0.785831	4.99421			-0.0178905	-0.00651982	0.787219	4.93758			-0.0502343	-0.0471891	0.785135	4.93758
-0.0503558	-0.0472193	0.785888	4.99432			-0.0178413	-0.00608918	0.787187	4.93822			-0.0503558	-0.0472193	0.785245	4.93822
-0.0504602	-0.0472346	0.785943	4.99442			-0.0177879	-0.00566278	0.787155	4.93885			-0.0504602	-0.0472346	0.785351	4.93885
-0.0505476	-0.0472352	0.785995	4.99452			-0.0177306	-0.00524072	0.787123	4.93947			-0.0505476	-0.0472352	0.785454	4.93947
-0.0506184	-0.0472213	0.786046	4.99462			-0.0176694	-0.0048231	0.787092	4.94008			-0.0506184	-0.0472213	0.785554	4.94008
-0.0506726	-0.0471933	0.786095	4.99472			-0.0176044	-0.00441001	0.787062	4.94069			-0.0506726	-0.0471933	0.785651	4.94069
-0.0507107	-0.0471513	0.786142	4.99481			-0.0175356	-0.00400155	0.787031	4.9413			-0.0507107	-0.0471513	0.785745	4.9413
-0.0507328	-0.0470956	0.786187	4.99491			-0.0174631	-0.0035978	0.787002	4.94189			-0.0507328	-0.0470956	0.785836	4.94189
-0.0507392	-0.0470265	0.78623	4.995			-0.0173871	-0.00319884	0.786972	4.94249			-0.0507392	-0.0470265	0.785924	4.94249
-0.0507302	-0.0469441	0.786271	4.99509			-0.0173076	-0.00280476	0.786943	4.94307			-0.0507302	-0.0469441	0.786009	4.94307
-0.0507059	-0.0468488	0.78631	4.99518			-0.0172247	-0.00241564	0.786915	4.94365			-0.0507059	-0.0468488	0.786091	4.94365
-0.0506667	-0.0467408	0.786348	4.99527			-0.0171385	-0.00203155	0.786887	4.94422			-0.0506667	-0.0467408	0.786171	4.94422
-0.0506127	-0.0466203	0.786384	4.99536			-0.0170491	-0.00165256	0.78686	4.94479			-0.0506127	-0.0466203	0.786248	4.94479
-0.0505444	-0.0464876	0.786419	4.99544			-0.0169565	-0.00127873	0.786832	4.94535			-0.0505444	-0.0464876	0.786322	4.94535
-0.0504618	-0.0463429	0.786452	4.99553			-0.0168608	-0.000910142	0.786806	4.94591			-0.0504618	-0.0463429	0.786394	4.94591
-0.0503653	-0.0461865	0.786484	4.99561			-0.0167622	-0.000546847	0.786779	4.94646			-0.0503653	-0.0461865	0.786464	4.94646
-0.0502552	-0.0460187	0.786514	4.99569			-0.0166606	-0.000188905	0.786754	4.947			-0.0502552	-0.0460187	0.786531	4.947
-0.0501316	-0.0458396	0.786542	4.99577			-0.0165563	0.000163628	0.786728	4.94754			-0.0501316	-0.0458396	0.786596	4.94754
-0.049995	-0.0456496	0.786569	4.99585			-0.0164492	0.0005107	0.786703	4.94808			-0.049995	-0.0456496	0.786658	4.94808
-0.0498454	-0.0454489	0.786595	4.99593			-0.0163394	0.000852262	0.786679	4.94861			-0.0498454	-0.0454489	0.786719	4.94861
-0.0496833	-0.0452377	0.78662	4.996			-0.0162271	0.00118827	0.786655	4.94913			-0.0496833	-0.0452377	0.786777	4.94913
-0.0495088	-0.0450163	0.786643	4.99608			-0.0161123	0.00151867	0.786631	4.94965			-0.0495088	-0.0450163	0.786834	4.94965
-0.0493223	-0.044785	0.786665	4.99615			-0.0159951	0.00184344	0.786608	4.95016			-0.0493223	-0.044785	0.786888	4.95016
-0.049124	-0.0445441	0.786686	4.99622			-0.0158756	0.00216253	0.786585	4.95067			-0.049124	-0.0445441	0.786941	4.95067
-0.0489141	-0.0442936	0.786705	4.99629			-0.0157538	0.0024759	0.786562	4.95117			-0.0489141	-0.0442936	0.786992	4.95117
-0.048693	-0.044034	0.786724	4.99636			-0.0156299	0.00278354	0.78654	4.95167			-0.048693	-0.044034	0.787041	4.95167
-0.0484609	-0.0437655	0.786742	4.99643			-0.0155038	0.0030854	0.786518	4.95216			-0.0484609	-0.0437655	0.787088	4.95216
-0.0482181	-0.0434882	0.786758	4.9965			-0.0153758	0.00338146	0.786497	4.95264			-0.0482181	-0.0434882	0.787134	4.95264
-0.0479648	-0.0432026	0.786774	4.99656			-0.0152458	0.00367171	0.786476	4.95313			-0.0479648	-0.0432026	0.787178	4.95313
-0.0477013	-0.0429087	0.786789	4.99663			-0.015114	0.00395611	0.786455	4.9536			-0.0477013	-0.0429087	0.78722	4.9536
-0.0474279	-0.0426069	0.786802	4.99669			-0.0149803	0.00423466	0.786435	4.95408			-0.0474279	-0.0426069	0.787261	4.95408
-0.0471449	-0.0422975	0.786815	4.99676			-0.014845	0.00450733	0.786415	4.95454			-0.0471449	-0.0422975	0.7873	4.95454
-0.0468524	-0.0419806	0.786827	4.99682			-0.0147081	0.00477412	0.786396	4.95501			-0.0468524	-0.0419806	0.787339	4.95501
-0.0465509	-0.0416564	0.786839	4.99688			-0.0145696	0.00503501	0.786377	4.95546			-0.0465509	-0.0416564	0.787375	4.95546
-0.0462404	-0.0413254	0.786849	4.99694			-0.0144296	0.00529	0.786358	4.95592			-0.0462404	-0.0413254	0.787411	4.95592
-0.0459214	-0.0409876	0.786859	4.99699			-0.0142882	0.00553908	0.786339	4.95637			-0.0459214	-0.0409876	0.787445	4.95637
-0.0455941	-0.0406433	0.786868	4.99705			-0.0141455	0.00578225	0.786321	4.95681			-0.0455941	-0.0406433	0.787478	4.95681
-0.0452586	-0.0402929	0.786876	4.99711			-0.0140016	0.00601952	0.786303	4.95725			-0.0452586	-0.0402929	0.78751	4.95725
-0.0449154	-0.0399364	0.786884	4.99716			-0.0138564	0.00625087	0.786286	4.95769			-0.0449154	-0.0399364	0.787541	4.95769
-0.0445646	-0.0395742	0.786892	4.99722			-0.0137101	0.00647633	0.786269	4.95812			-0.0445646	-0.0395742	0.787571	4.95812
-0.0442065	-0.0392064	0.786898	4.99727			-0.0135628	0.00669589	0.786252	4.95854			-0.0442065	-0.0392064	0.7876	4.95854
-0.0438414	-0.0388334	0.786904	4.99732			-0.0134145	0.00690957	0.786235	4.95897			-0.0438414	-0.0388334	0.787627	4.95897
-0.0434695	-0.0384553	0.78691	4.99737			-0.0132652	0.00711738	0.786219	4.95938			-0.0434695	-0.0384553	0.787654	4.95938
-0.043091	-0.0380723	0.786915	4.99742			-0.0131151	0.00731933	0.786203	4.9598			-0.043091	-0.0380723	0.78768	4.9598
-0.0427062	-0.0376848	0.78692	4.99747			-0.0129643	0.00751544	0.786188	4.96021			-0.0427062	-0.0376848	0.787705	4.96021
-0.0423155	-0.0372929	0.786924	4.99752			-0.0128127	0.00770572	0.786172	4.96061			-0.0423155	-0.0372929	0.787729	4.96061
-0.0419189	-0.0368968	0.786928	4.99757			-0.0126605	0.00789021	0.786157	4.96101			-0.0419189	-0.0368968	0.787753	4.96101
-0.0415168	-0.0364968	0.786932	4.99761			-0.0125076	0.00806891	0.786143	4.96141			-0.0415168	-0.0364968	0.787776	4.96141
-0.0411093	-0.0360931	0.786935	4.99766			-0.0123543	0.00824185	0.786128	4.9618			-0.0411093	-0.0360931	0.787798	4.9618
-0.0406969	-0.0356859	0.786938	4.9977			-0.0122005	0.00840907	0.786114	4.96219			-0.0406969	-0.0356859	0.787819	4.96219
-0.0402796	-0.0352754	0.78694	4.99775			-0.0120463	0.00857059	0.7861	4.96258			-0.0402796	-0.0352754	0.78784	4.96258
-0.0398577	-0.0348619	0.786943	4.99779			-0.0118917	0.00872643	0.786086	4.96296			-0.0398577	-0.0348619	0.78786	4.96296
-0.0394314	-0.0344454	0.786945	4.99783			-0.0117369	0.00887663	0.786073	4.96334			-0.0394314	-0.0344454	0.787879	4.96334
-0.0390011	-0.0340263	0.786946	4.99787			-0.0115818	0.00902123	0.78606	4.96371			-0.0390011	-0.0340263	0.787898	4.96371
-0.0385668	-0.0336048	0.786948	4.99791			-0.0114265	0.00916026	0.786047	4.96408			-0.0385668	-0.0336048	0.787916	4.96408
-0.0381289	-0.033181	0.786949	4.99795			-0.0112712	0.00929376	0.786034	4.96444			-0.0381289	-0.033181	0.787934	4.96444
-0.0376875	-0.0327552	0.78695	4.99799			-0.0111158	0.00942176	0.786022	4.96481			-0.0376875	-0.0327552	0.787951	4.96481
-0.0372429	-0.0323275	0.786951	4.99803			-0.0109603	0.00954431	0.786009	4.96516			-0.0372429	-0.0323275	0.787968	4.96516
-0.0367954	-0.0318981	0.786952	4.99806			-0.010805	0.00966145	0.785997	4.96552			-0.0367954	-0.0318981	0.787984	4.96552
-0.036345	-0.0314673	0.786953	4.9981			-0.0106497	0.00977322	0.785986	4.96587			-0.036345	-0.0314673	0.787999	4.96587
-0.0358921	-0.0310352	0.786953	4.99814			-0.0104945	0.00987967	0.785974	4.96622			-0.0358921	-0.0310352	0.788015	4.96622
-0.0354368	-0.030602	0.786954	4.99817			-0.0103396	0.00998084	0.785963	4.96656			-0.0354368	-0.030602	0.78803	4.96656
-0.0349793	-0.0301679	0.786954	4.99821			-0.0101849	0.0100768	0.785952	4.9669			-0.0349793	-0.0301679	0.788044	4.9669
-0.03452	-0.029733	0.786954	4.99824			-0.0100306	0.0101675	0.785941	4.96724			-0.03452	-0.029733	0.788058	4.96724
-0.0340588	-0.0292976	0.786954	4.99827			-0.00987653	0.0102532	0.78593	4.96757			-0.0340588	-0.0292976	0.788072	4.96757
-0.0335962	-0.0288618	0.786954	4.9983			-0.00972289	0.0103337	0.785919	4.9679			-0.0335962	-0.0288618	0.788085	4.9679
-0.0331322	-0.0284258	0.786954	4.99834			-0.00956968	0.0104092	0.785909	4.96823			-0.0331322	-0.0284258	0.788099	4.96823
-0.032667	-0.0279898	0.786954	4.99837			-0.00941696	0.0104798	0.785899	4.96856			-0.032667	-0.0279898	0.788111	4.96856
-0.0322009	-0.0275538	0.786954	4.9984			-0.00926476	0.0105454	0.785889	4.96888			-0.0322009	-0.0275538	0.788124	4.96888
-0.031734	-0.0271182	0.786954	4.99843			-0.00911312	0.0106062	0.785879	4.96919			-0.031734	-0.0271182	0.788136	4.96919
-0.0312666	-0.026683	0.786954	4.99846			-0.0089621	0.0106622	0.785869	4.96951			-0.0312666	-0.026683	0.788147	4.96951
-0.0307987	-0.0262484	0.786953	4.99848			-0.00881172	0.0107134	0.78586	4.96982			-0.0307987	-0.0262484	0.788159	4.96982
-0.0303306	-0.0258146	0.786953	4.99851			-0.00866203	0.01076	0.78585	4.97012			-0.0303306	-0.0258146	0.78817	4.97012
-0.0298625	-0.0253817	0.786953	4.99854			-0.00851306	0.0108019	0.785841	4.97043			-0.0298625	-0.0253817	0.788181	4.97043
-0.0293945	-0.0249498	0.786952	4.99857			-0.00836486	0.0108392	0.785832	4.97073			-0.0293945	-0.0249498	0.788191	4.97073
-0.0289268	-0.0245191	0.786952	4.99859			-0.00821746	0.0108721	0.785823	4.97103			-0.0289268	-0.0245191	0.788202	4.97103
-0.0284595	-0.0240897	0.786952	4.99862			-0.00807089	0.0109005	0.785815	4.97132			-0.0284595	-0.0240897	0.788212	4.97132
-0.0279929	-0.0236619	0.786951	4.99864			-0.0079252	0.0109245	0.785806	4.97162			-0.0279929	-0.0236619	0.788222	4.97162
-0.0275271	-0.0232356	0.786951	4.99867			-0.0077804	0.0109442	0.785798	4.9719			-0.0275271	-0.0232356	0.788231	4.9719
-0.0270622	-0.0228111	0.786951	4.99869			-0.00763654	0.0109597	0.785789	4.97219			-0.0270622	-0.0228111	0.788241	4.97219
-0.0265984	-0.0223884	0.78695	4.99871			-0.00749364	0.010971	0.785781	4.97247			-0.0265984	-0.0223884	0.78825	4.97247
-0.0261358	-0.0219678	0.78695	4.99874			-0.00735175	0.0109782	0.785773	4.97275			-0.0261358	-0.0219678	0.788258	4.97275
-0.0256747	-0.0215492	0.78695	4.99876			-0.00721087	0.0109813	0.785765	4.97303			-0.0256747	-0.0215492	0.788267	4.97303
-0.0252151	-0.0211329	0.786949	4.99878			-0.00707106	0.0109804	0.785757	4.97331			-0.0252151	-0.0211329	0.788275	4.97331
-0.0247572	-0.020719	0.786949	4.9988			-0.00693232	0.0109756	0.78575	4.97358			-0.0247572	-0.020719	0.788283	4.97358
-0.0243011	-0.0203075	0.786949	4.99883			-0.0067947	0.010967	0.785742	4.97385			-0.0243011	-0.0203075	0.788291	4.97385
-0.0238469	-0.0198986	0.786949	4.99885			-0.00665821	0.0109546	0.785735	4.97411			-0.0238469	-0.0198986	0.788299	4.97411
-0.0233949	-0.0194924	0.786948	4.99887			-0.00652288	0.0109385	0.785728	4.97438			-0.0233949	-0.0194924	0.788306	4.97438
-0.022945	-0.019089	0.786948	4.99889			-0.00638873	0.0109187	0.78572	4.97464			-0.022945	-0.019089	0.788313	4.97464
-0.0224975	-0.0186884	0.786948	4.99891			-0.0062558	0.0108954	0.785713	4.9749			-0.0224975	-0.0186884	0.78832	4.9749
-0.0220525	-0.0182909	0.786947	4.99893			-0.00612409	0.0108686	0.785706	4.97515			-0.0220525	-0.0182909	0.788327	4.97515
-0.02161	-0.0178964	0.786947	4.99894			-0.00599363	0.0108383	0.7857	4.97541			-0.02161	-0.0178964	0.788333	4.97541
-0.0211703	-0.0175051	0.786947	4.99896			-0.00586444	0.0108047	0.785693	4.97566			-0.0211703	-0.0175051	0.788339	4.97566
-0.0207334	-0.0171171	0.786947	4.99898			-0.00573654	0.0107678	0.785686	4.97591			-0.0207334	-0.0171171	0.788345	4.97591
-0.0202993	-0.0167324	0.786946	4.999			-0.00560995	0.0107276	0.78568	4.97615			-0.0202993	-0.0167324	0.78835	4.97615
-0.0198683	-0.0163512	0.786946	4.99902			-0.00548468	0.0106844	0.785673	4.97639			-0.0198683	-0.0163512	0.788356	4.97639
-0.0194405	-0.0159735	0.786946	4.99903			-0.00536076	0.010638	0.785667	4.97663			-0.0194405	-0.0159735	0.788361	4.97663
-0.0190159	-0.0155993	0.786945	4.99905			-0.0052382	0.0105886	0.785661	4.97687			-0.0190159	-0.0155993	0.788366	4.97687
-0.0185946	-0.0152289	0.786945	4.99907			-0.00511701	0.0105363	0.785654	4.97711			-0.0185946	-0.0152289	0.78837	4.97711
-0.0181767	-0.0148621	0.786945	4.99908			-0.00499721	0.0104811	0.785648	4.97734			-0.0181767	-0.0148621	0.788375	4.97734
-0.0177623	-0.0144992	0.786944	4.9991			-0.00487881	0.0104231	0.785642	4.97757			-0.0177623	-0.0144992	0.788379	4.97757
-0.0173516	-0.0141401	0.786944	4.99911			-0.00476183	0.0103624	0.785637	4.9778			-0.0173516	-0.0141401	0.788383	4.9778
-0.0169445	-0.013785	0.786944	4.99913			-0.00464627	0.0102991	0.785631	4.97803			-0.0169445	-0.013785	0.788386	4.97803
-0.0165412	-0.0134339	0.786943	4.99914			-0.00453216	0.0102331	0.785625	4.97825			-0.0165412	-0.0134339	0.78839	4.97825
-0.0161417	-0.0130868	0.786943	4.99916			-0.00441949	0.0101647	0.785619	4.97847			-0.0161417	-0.0130868	0.788393	4.97847
-0.0157462	-0.0127438	0.786942	4.99917			-0.00430827	0.0100938	0.785614	4.97869			-0.0157462	-0.0127438	0.788395	4.97869
-0.0153547	-0.012405	0.786942	4.99919			-0.00419853	0.0100205	0.785608	4.97891			-0.0153547	-0.012405	0.788398	4.97891
-0.0149672	-0.0120704	0.786941	4.9992			-0.00409026	0.00994494	0.785603	4.97912			-0.0149672	-0.0120704	0.7884	4.97912
-0.0145838	-0.01174	0.78694	4.99921			-0.00398347	0.00986713	0.785597	4.97934			-0.0145838	-0.01174	0.788402	4.97934
-0.0142047	-0.011414	0.78694	4.99923			-0.00387817	0.00978715	0.785592	4.97955			-0.0142047	-0.011414	0.788404	4.97955
-0.0138298	-0.0110922	0.786939	4.99924			-0.00377437	0.00970507	0.785587	4.97975			-0.0138298	-0.0110922	0.788405	4.97975
-0.0134592	-0.0107749	0.786938	4.99925			-0.00367206	0.00962097	0.785582	4.97996			-0.0134592	-0.0107749	0.788406	4.97996
-0.013093	-0.010462	0.786937	4.99926			-0.00357126	0.0095349	0.785577	4.98016			-0.013093	-0.010462	0.788407	4.98016
-0.0127312	-0.0101535	0.786936	4.99928			-0.00347197	0.00944695	0.785572	4.98037			-0.0127312	-0.0101535	0.788407	4.98037
-0.0123739	-0.00984945	0.786935	4.99929			-0.00337419	0.00935716	0.785567	4.98057			-0.0123739	-0.00984945	0.788407	4.98057
-0.0120211	-0.00954994	0.786934	4.9993			-0.00327792	0.00926562	0.785562	4.98076			-0.0120211	-0.00954994	0.788407	4.98076
-0.0116729	-0.00925496	0.786933	4.99931			-0.00318317	0.00917239	0.785557	4.98096			-0.0116729	-0.00925496	0.788407	4.98096
-0.0113293	-0.00896454	0.786932	4.99932			-0.00308993	0.00907753	0.785553	4.98115			-0.0113293	-0.00896454	0.788406	4.98115
-0.0109903	-0.00867869	0.786931	4.99933			-0.00299821	0.00898112	0.785548	4.98135			-0.0109903	-0.00867869	0.788405	4.98135
-0.010656	-0.00839744	0.786929	4.99935			-0.00290801	0.00888321	0.785543	4.98154			-0.010656	-0.00839744	0.788404	4.98154
-0.0103265	-0.0081208	0.786928	4.99936			-0.00281933	0.00878386	0.785539	4.98172			-0.0103265	-0.0081208	0.788403	4.98172
-0.0100017	-0.00784879	0.786926	4.99937			-0.00273216	0.00868316	0.785534	4.98191			-0.0100017	-0.00784879	0.788401	4.98191
-0.00968162	-0.00758142	0.786925	4.99938			-0.00264651	0.00858115	0.78553	4.98209			-0.00968162	-0.00758142	0.788399	4.98209
-0.00936639	-0.00731869	0.786923	4.99939			-0.00256236	0.0084779	0.785526	4.98228			-0.00936639	-0.00731869	0.788396	4.98228
-0.00905598	-0.00706063	0.786921	4.9994			-0.00247973	0.00837347	0.785521	4.98246			-0.00905598	-0.00706063	0.788393	4.98246
-0.00875042	-0.00680723	0.786919	4.99941			-0.0023986	0.00826793	0.785517	4.98264			-0.00875042	-0.00680723	0.78839	4.98264
-0.00844973	-0.00655849	0.786917	4.99942			-0.00231897	0.00816133	0.785513	4.98281			-0.00844973	-0.00655849	0.788387	4.98281
-0.00815392	-0.00631442	0.786915	4.99943			-0.00224084	0.00805374	0.785509	4.98299			-0.00815392	-0.00631442	0.788383	4.98299
-0.00786301	-0.00607502	0.786913	4.99943			-0.0021642	0.00794522	0.785505	4.98316			-0.00786301	-0.00607502	0.788379	4.98316
-0.00757702	-0.00584029	0.786911	4.99944			-0.00208905	0.00783582	0.785501	4.98333			-0.00757702	-0.00584029	0.788375	4.98333
-0.00729595	-0.00561022	0.786908	4.99945			-0.00201537	0.00772561	0.785497	4.9835			-0.00729595	-0.00561022	0.788371	4.9835
-0.0070198	-0.0053848	0.786906	4.99946			-0.00194317	0.00761464	0.785493	4.98367			-0.0070198	-0.0053848	0.788366	4.98367
-0.00674859	-0.00516404	0.786903	4.99947			-0.00187244	0.00750296	0.785489	4.98384			-0.00674859	-0.00516404	0.788361	4.98384
-0.00648232	-0.00494791	0.7869	4.99948			-0.00180316	0.00739065	0.785486	4.984			-0.00648232	-0.00494791	0.788355	4.984
-0.006221	-0.00473641	0.786898	4.99949			-0.00173534	0.00727774	0.785482	4.98416			-0.006221	-0.00473641	0.788349	4.98416
-0.0059646	-0.00452952	0.786895	4.9995			-0.00166896	0.0071643	0.785478	4.98433			-0.0059646	-0.00452952	0.788343	4.98433
-0.00571315	-0.00432723	0.786892	4.9995			-0.00160401	0.00705038	0.785475	4.98448			-0.00571315	-0.00432723	0.788337	4.98448
-0.00546663	-0.00412952	0.786888	4.99951			-0.00154049	0.00693603	0.785471	4.98464			-0.00546663	-0.00412952	0.788331	4.98464
-0.00522503	-0.00393637	0.786885	4.99952			-0.00147839	0.00682131	0.785468	4.9848			-0.00522503	-0.00393637	0.788324	4.9848
-0.00498835	-0.00374777	0.786882	4.99953			-0.00141769	0.00670627	0.785464	4.98495			-0.00498835	-0.00374777	0.788316	4.98495
-0.00475657	-0.00356369	0.786878	4.99953			-0.00135839	0.00659096	0.785461	4.98511			-0.00475657	-0.00356369	0.788309	4.98511
-0.00452969	-0.00338411	0.786874	4.99954			-0.00130048	0.00647543	0.785457	4.98526			-0.00452969	-0.00338411	0.788301	4.98526
-0.00430769	-0.003209	0.786871	4.99955			-0.00124394	0.00635973	0.785454	4.98541			-0.00430769	-0.003209	0.788293	4.98541
-0.00409055	-0.00303834	0.786867	4.99956			-0.00118876	0.00624391	0.785451	4.98556			-0.00409055	-0.00303834	0.788285	4.98556
-0.00387826	-0.00287211	0.786863	4.99956			-0.00113494	0.00612801	0.785448	4.9857			-0.00387826	-0.00287211	0.788276	4.9857
-0.00367079	-0.00271027	0.786859	4.99957			-0.00108246	0.00601209	0.785445	4.98585			-0.00367079	-0.00271027	0.788268	4.98585
-0.00346813	-0.00255279	0.786854	4.99958			-0.0010313	0.00589619	0.785441	4.98599			-0.00346813	-0.00255279	0.788258	4.98599
-0.00327025	-0.00239964	0.78685	4.99958			-0.00098146	0.00578036	0.785438	4.98614			-0.00327025	-0.00239964	0.788249	4.98614
-0.00307713	-0.00225079	0.786845	4.99959			-0.000932923	0.00566463	0.785435	4.98628			-0.00307713	-0.00225079	0.788239	4.98628
-0.00288874	-0.00210621	0.786841	4.9996			-0.000885676	0.00554906	0.785432	4.98642			-0.00288874	-0.00210621	0.78823	4.98642
-0.00270506	-0.00196585	0.786836	4.9996			-0.000839706	0.00543368	0.78543	4.98656			-0.00270506	-0.00196585	0.788219	4.98656
-0.00252606	-0.00182969	0.786831	4.99961			-0.000795	0.00531855	0.785427	4.98669			-0.00252606	-0.00182969	0.788209	4.98669
-0.0023517	-0.00169769	0.786826	4.99962			-0.000751543	0.0052037	0.785424	4.98683			-0.0023517	-0.00169769	0.788198	4.98683
-0.00218197	-0.00156981	0.786821	4.99962			-0.000709322	0.00508917	0.785421	4.98696			-0.00218197	-0.00156981	0.788187	4.98696
-0.00201681	-0.00144601	0.786816	4.99963			-0.000668323	0.00497499	0.785419	4.98709			-0.00201681	-0.00144601	0.788176	4.98709
-0.00185621	-0.00132625	0.786811	4.99963			-0.000628531	0.00486122	0.785416	4.98723			-0.00185621	-0.00132625	0.788165	4.98723
-0.00170012	-0.00121048	0.786805	4.99964			-0.000589932	0.00474789	0.785413	4.98736			-0.00170012	-0.00121048	0.788153	4.98736
-0.0015485	-0.00109868	0.7868	4.99964			-0.000552511	0.00463503	0.785411	4.98748			-0.0015485	-0.00109868	0.788142	4.98748
-0.00140133	-0.000990783	0.786794	4.99965			-0.000516253	0.00452268	0.785408	4.98761			-0.00140133	-0.000990783	0.78813	4.98761
-0.00125856	-0.000886758	0.786788	4.99966			-0.000481143	0.00441088	0.785406	4.98774			-0.00125856	-0.000886758	0.788117	4.98774
-0.00112015	-0.000786559	0.786782	4.99966			-0.000447166	0.00429966	0.785403	4.98786			-0.00112015	-0.000786559	0.788105	4.98786
-0.000986064	-0.000690139	0.786776	4.99967			-0.000414307	0.00418906	0.785401	4.98799			-0.000986064	-0.000690139	0.788092	4.98799
-0.000856255	-0.000597452	0.78677	4.99967			-0.00038255	0.0040791	0.785399	4.98811			-0.000856255	-0.000597452	0.788079	4.98811
-0.000730682	-0.000508451	0.786764	4.99968			-0.00035188	0.00396982	0.785396	4.98823			-0.000730682	-0.000508451	0.788066	4.98823
-0.000609301	-0.000423089	0.786758	4.99968			-0.00032228	0.00386125	0.785394	4.98835			-0.000609301	-0.000423089	0.788053	4.98835
-0.000492068	-0.000341317	0.786752	4.99969			-0.000293735	0.00375343	0.785392	4.98847			-0.000492068	-0.000341317	0.788039	4.98847
-0.000378936	-0.000263087	0.786745	4.99969			-0.000266229	0.00364637	0.78539	4.98858			-0.000378936	-0.000263087	0.788026	4.98858
-0.000269859	-0.000188348	0.786739	4.9997			-0.000239746	0.00354011	0.785388	4.9887			-0.000269859	-0.000188348	0.788012	4.9887
-0.000164789	-0.000117052	0.786732	4.9997			-0.00021427	0.00343468	0.785385	4.98882			-0.000164789	-0.000117052	0.787998	4.98882
-6.36796e-05	-4.91471e-05	0.786725	4.99971			-0.000189784	0.0033301	0.785383	4.98893			-6.36796e-05	-4.91471e-05	0.787984	4.98893
3.35196e-05	1.54171e-05	0.786718	4.99971			-0.000166273	0.00322641	0.785381	4.98904			3.35196e-05	1.54171e-05	0.787969	4.98904
0.000126858	7.66924e-05	0.786711	4.99972			-0.00014372	0.00312361	0.78538	4.98915			0.000126858	7.66924e-05	0.787955	4.98915
0.000216385	0.00013473	0.786704	4.99972			-0.000122109	0.00302175	0.785378	4.98926			0.000216385	0.00013473	0.78794	4.98926
0.000302152	0.000189584	0.786697	4.99972			-0.000101423	0.00292084	0.785376	4.98937			0.000302152	0.000189584	0.787925	4.98937
0.000384211	0.000241304	0.78669	4.99973			-8.16458e-05	0.00282091	0.785374	4.98948			0.000384211	0.000241304	0.78791	4.98948
0.000462614	0.000289946	0.786683	4.99973			-6.27612e-05	0.00272197	0.785372	4.98959			0.000462614	0.000289946	0.787895	4.98959
0.000537413	0.000335562	0.786675	4.99974			-4.47526e-05	0.00262405	0.78537	4.98969			0.000537413	0.000335562	0.78788	4.98969
0.000608661	0.000378205	0.786668	4.99974			-2.76036e-05	0.00252717	0.785369	4.9898			0.000608661	0.000378205	0.787865	4.9898
0.000676411	0.000417929	0.786661	4.99975			-1.12976e-05	0.00243135	0.785367	4.9899			0.000676411	0.000417929	0.787849	4.9899
0.000740719	0.000454789	0.786653	4.99975			4.18182e-06	0.00233661	0.785365	4.99001			0.000740719	0.000454789	0.787833	4.99001
0.000801638	0.000488838	0.786645	4.99975			1.88511e-05	0.00224296	0.785364	4.99011			0.000801638	0.000488838	0.787818	4.99011
0.000859223	0.000520131	0.786638	4.99976			3.27268e-05	0.00215043	0.785362	4.99021			0.000859223	0.000520131	0.787802	4.99021
0.000913529	0.000548722	0.78663	4.99976			4.58253e-05	0.00205902	0.785361	4.99031			0.000913529	0.000548722	0.787786	4.99031
0.000964612	0.000574666	0.786622	4.99976			5.81628e-05	0.00196876	0.785359	4.99041			0.000964612	0.000574666	0.78777	4.99041
0.00101253	0.000598018	0.786614	4.99977			6.97559e-05	0.00187966	0.785358	4.9905			0.00101253	0.000598018	0.787754	4.9905
0.00105733	0.000618832	0.786606	4.99977			8.06209e-05	0.00179174	0.785356	4.9906			0.00105733	0.000618832	0.787737	4.9906
0.00109908	0.000637163	0.786598	4.99978			9.07738e-05	0.001705	0.785355	4.9907			0.00109908	0.000637163	0.787721	4.9907
0.00113783	0.000653066	0.78659	4.99978			0.000100231	0.00161946	0.785354	4.99079			0.00113783	0.000653066	0.787705	4.99079
0.00117363	0.000666595	0.786582	4.99978			0.000109009	0.00153513	0.785352	4.99088			0.00117363	0.000666595	0.787688	4.99088
0.00120655	0.000677806	0.786574	4.99979			0.000117123	0.00145202	0.785351	4.99098			0.00120655	0.000677806	0.787671	4.99098
0.00123665	0.000686753	0.786566	4.99979			0.000124589	0.00137015	0.78535	4.99107			0.00123665	0.000686753	0.787655	4.99107
0.00126396	0.00069349	0.786558	4.99979			0.000131424	0.00128953	0.785348	4.99116			0.00126396	0.00069349	0.787638	4.99116
0.00128857	0.000698072	0.786549	4.9998			0.000137643	0.00121015	0.785347	4.99125			0.00128857	0.000698072	0.787621	4.99125
0.00131051	0.000700553	0.786541	4.9998			0.000143262	0.00113204	0.785346	4.99134			0.00131051	0.000700553	0.787604	4.99134
0.00132986	0.000700988	0.786533	4.9998			0.000148297	0.00105519	0.785345	4.99143			0.00132986	0.000700988	0.787587	4.99143
0.00134666	0.00069943	0.786524	4.99981			0.000152763	0.000979625	0.785344	4.99151			0.00134666	0.00069943	0.78757	4.99151
0.00136097	0.000695933	0.786516	4.99981			0.000156675	0.000905339	0.785343	4.9916			0.00136097	0.000695933	0.787553	4.9916
0.00137286	0.00069055	0.786507	4.99981			0.000160049	0.00083234	0.785342	4.99169			0.00137286	0.00069055	0.787536	4.99169
0.00138237	0.000683336	0.786499	4.99981			0.000162901	0.000760635	0.785341	4.99177			0.00138237	0.000683336	0.787519	4.99177
0.00138956	0.000674342	0.78649	4.99982			0.000165244	0.000690227	0.78534	4.99185			0.00138956	0.000674342	0.787502	4.99185
0.00139449	0.000663623	0.786482	4.99982			0.000167095	0.000621121	0.785339	4.99194			0.00139449	0.000663623	0.787485	4.99194
0.00139722	0.000651229	0.786473	4.99982			0.000168468	0.000553319	0.785338	4.99202			0.00139722	0.000651229	0.787468	4.99202
0.0013978	0.000637215	0.786465	4.99983			0.000169377	0.000486825	0.785337	4.9921			0.0013978	0.000637215	0.787451	4.9921
0.00139629	0.00062163	0.786456	4.99983			0.000169838	0.000421641	0.785336	4.99218			0.00139629	0.00062163	0.787433	4.99218
0.00139275	0.000604527	0.786448	4.99983			0.000169865	0.000357767	0.785336	4.99226			0.00139275	0.000604527	0.787416	4.99226
0.00138722	0.000585958	0.786439	4.99983			0.000169472	0.000295205	0.785335	4.99234			0.00138722	0.000585958	0.787399	4.99234
0.00137977	0.000565972	0.78643	4.99984			0.000168672	0.000233956	0.785334	4.99242			0.00137977	0.000565972	0.787382	4.99242
0.00137045	0.00054462	0.786422	4.99984			0.000167482	0.000174018	0.785333	4.99249			0.00137045	0.00054462	0.787364	4.99249
0.00135931	0.000521953	0.786413	4.99984			0.000165913	0.000115391	0.785333	4.99257			0.00135931	0.000521953	0.787347	4.99257
0.00134641	0.000498019	0.786404	4.99984			0.00016398	5.80748e-05	0.785332	4.99265			0.00134641	0.000498019	0.78733	4.99265
0.0013318	0.000472867	0.786396	4.99985			0.000161697	2.06602e-06	0.785331	4.99272			0.0013318	0.000472867	0.787313	4.99272
0.00131555	0.000446548	0.786387	4.99985			0.000159076	-5.26371e-05	0.785331	4.99279			0.00131555	0.000446548	0.787295	4.99279
0.00129769	0.000419107	0.786378	4.99985			0.000156131	-0.000106037	0.78533	4.99287			0.00129769	0.000419107	0.787278	4.99287
0.00127828	0.000390594	0.78637	4.99985			0.000152875	-0.000158138	0.78533	4.99294			0.00127828	0.000390594	0.787261	4.99294
0.00125738	0.000361056	0.786361	4.99986			0.000149321	-0.000208944	0.785329	4.99301			0.00125738	0.000361056	0.787244	4.99301
0.00123504	0.000330539	0.786352	4.99986			0.000145482	-0.000258458	0.785328	4.99308			0.00123504	0.000330539	0.787227	4.99308
0.00121131	0.000299089	0.786344	4.99986			0.00014137	-0.000306686	0.785328	4.99315			0.00121131	0.000299089	0.787209	4.99315
0.00118624	0.000266752	0.786335	4.99986			0.000136998	-0.000353632	0.785327	4.99322			0.00118624	0.000266752	0.787192	4.99322
0.00115987	0.000233574	0.786327	4.99987			0.000132377	-0.000399303	0.785327	4.99329			0.00115987	0.000233574	0.787175	4.99329
0.00113227	0.000199598	0.786318	4.99987			0.000127521	-0.000443704	0.785327	4.99336			0.00113227	0.000199598	0.787158	4.99336
0.00110349	0.000164869	0.786309	4.99987			0.000122439	-0.000486843	0.785326	4.99343			0.00110349	0.000164869	0.787141	4.99343
0.00107356	0.000129431	0.786301	4.99987			0.000117146	-0.000528725	0.785326	4.9935			0.00107356	0.000129431	0.787124	4.9935
0.00104254	9.33258e-05	0.786292	4.99987			0.000111651	-0.000569359	0.785325	4.99356			0.00104254	9.33258e-05	0.787107	4.99356
0.00101048	5.65963e-05	0.786284	4.99988			0.000105966	-0.000608752	0.785325	4.99363			0.00101048	5.65963e-05	0.78709	4.99363
0.000977427	1.92841e-05	0.786275	4.99988			0.000100102	-0.000646912	0.785325	4.99369			0.000977427	1.92841e-05	0.787073	4.99369
0.000943425	-1.85697e-05	0.786267	4.99988			9.40706e-05	-0.000683848	0.785324	4.99376			0.000943425	-1.85697e-05	0.787057	4.99376
0.000908523	-5.69246e-05	0.786258	4.99988			8.78819e-05	-0.000719568	0.785324	4.99382			0.000908523	-5.69246e-05	0.78704	4.99382
0.000872765	-9.57405e-05	0.78625	4.99988			8.15466e-05	-0.000754083	0.785324	4.99388			0.000872765	-9.57405e-05	0.787023	4.99388
0.000836198	-0.000134978	0.786241	4.99989			7.50752e-05	-0.0007874	0.785324	4.99394			0.000836198	-0.000134978	0.787007	4.99394
0.000798867	-0.000174599	0.786233	4.99989			6.84777e-05	-0.000819531	0.785323	4.99401			0.000798867	-0.000174599	0.78699	4.99401
0.000760816	-0.000214565	0.786224	4.99989			6.17641e-05	-0.000850485	0.785323	4.99407			0.000760816	-0.000214565	0.786973	4.99407
0.000722089	-0.000254839	0.786216	4.99989			5.49443e-05	-0.000880273	0.785323	4.99413			0.000722089	-0.000254839	0.786957	4.99413
0.000682728	-0.000295384	0.786207	4.99989			4.80278e-05	-0.000908905	0.785323	4.99419			0.000682728	-0.000295384	0.786941	4.99419
0.000642776	-0.000336163	0.786199	4.99989			4.1024e-05	-0.000936393	0.785323	4.99425			0.000642776	-0.000336163	0.786924	4.99425
0.000602275	-0.000377142	0.786191	4.9999			3.39422e-05	-0.000962748	0.785322	4.9943			0.000602275	-0.000377142	0.786908	4.9943
0.000561266	-0.000418285	0.786183	4.9999			2.67914e-05	-0.000987982	0.785322	4.99436			0.000561266	-0.000418285	0.786892	4.99436
0.00051979	-0.000459559	0.786174	4.9999			1.95804e-05	-0.00101211	0.785322	4.99442			0.00051979	-0.000459559	0.786876	4.99442
0.000477887	-0.00050093	0.786166	4.9999			1.23178e-05	-0.00103513	0.785322	4.99448			0.000477887	-0.00050093	0.786859	4.99448
0.000435595	-0.000542364	0.786158	4.9999			5.0122e-06	-0.00105708	0.785322	4.99453			0.000435595	-0.000542364	0.786843	4.99453
0.000392953	-0.000583831	0.78615	4.9999			-2.32829e-06	-0.00107795	0.785322	4.99459			0.000392953	-0.000583831	0.786828	4.99459
0.00035	-0.000625298	0.786142	4.99991			-9.69554e-06	-0.00109776	0.785322	4.99464			0.00035	-0.000625298	0.786812	4.99464
0.000306772	-0.000666734	0.786134	4.99991			-1.70817e-05	-0.00111652	0.785322	4.9947			0.000306772	-0.000666734	0.786796	4.9947
0.000263306	-0.00070811	0.786126	4.99991			-2.44791e-05	-0.00113425	0.785322	4.99475			0.000263306	-0.00070811	0.78678	4.99475
0.000219639	-0.000749395	0.786118	4.99991			-3.18802e-05	-0.00115097	0.785322	4.99481			0.000219639	-0.000749395	0.786765	4.99481
0.000175805	-0.000790562	0.78611	4.99991			-3.92777e-05	-0.00116667	0.785322	4.99486			0.000175805	-0.000790562	0.786749	4.99486
0.000131838	-0.000831581	0.786102	4.99991			-4.66645e-05	-0.00118139	0.785322	4.99491			0.000131838	-0.000831581	0.786734	4.99491
8.77736e-05	-0.000872426	0.786094	4.99991			-5.40336e-05	-0.00119512	0.785322	4.99496			8.77736e-05	-0.000872426	0.786718	4.99496
4.36438e-05	-0.000913069	0.786086	4.99992			-6.13785e-05	-0.00120789	0.785322	4.99501			4.36438e-05	-0.000913069	0.786703	4.99501
-5.18455e-07	-0.000953485	0.786078	4.99992			-6.86924e-05	-0.00121971	0.785322	4.99506			-5.18455e-07	-0.000953485	0.786688	4.99506
-4.46815e-05	-0.000993647	0.78607	4.99992			-7.5969e-05	-0.0012306	0.785322	4.99511			-4.46815e-05	-0.000993647	0.786673	4.99511
-8.88141e-05	-0.00103353	0.786063	4.99992			-8.32021e-05	-0.00124056	0.785322	4.99516			-8.88141e-05	-0.00103353	0.786657	4.99516
-0.000132886	-0.00107312	0.786055	4.99992			-9.03858e-05	-0.00124962	0.785322	4.99521			-0.000132886	-0.00107312	0.786643	4.99521
-0.000176867	-0.00111237	0.786047	4.99992			-9.75141e-05	-0.00125779	0.785322	4.99526			-0.000176867	-0.00111237	0.786628	4.99526
-0.000220728	-0.00115128	0.78604	4.99992			-0.000104582	-0.00126508	0.785322	4.99531			-0.000220728	-0.00115128	0.786613	4.99531
-0.000264442	-0.00118982	0.786032	4.99992			-0.000111583	-0.00127151	0.785323	4.99536			-0.000264442	-0.00118982	0.786598	4.99536
-0.000307979	-0.00122797	0.786025	4.99993			-0.000118512	-0.00127709	0.785323	4.99541			-0.000307979	-0.00122797	0.786584	4.99541
-0.000351314	-0.0012657	0.786017	4.99993			-0.000125365	-0.00128184	0.785323	4.99545			-0.000351314	-0.0012657	0.786569	4.99545
-0.00039442	-0.001303	0.78601	4.99993			-0.000132136	-0.00128577	0.785323	4.9955			-0.00039442	-0.001303	0.786555	4.9955
-0.000437271	-0.00133985	0.786002	4.99993			-0.00013882	-0.00128891	0.785323	4.99554			-0.000437271	-0.00133985	0.78654	4.99554
-0.000479842	-0.00137623	0.785995	4.99993			-0.000145414	-0.00129125	0.785323	4.99559			-0.000479842	-0.00137623	0.786526	4.99559
-0.00052211	-0.00141212	0.785988	4.99993			-0.000151912	-0.00129283	0.785324	4.99563			-0.00052211	-0.00141212	0.786512	4.99563
-0.000564049	-0.0014475	0.78598	4.99993			-0.00015831	-0.00129365	0.785324	4.99568			-0.000564049	-0.0014475	0.786498	4.99568
-0.000605639	-0.00148235	0.785973	4.99993			-0.000164605	-0.00129374	0.785324	4.99572			-0.000605639	-0.00148235	0.786484	4.99572
-0.000646855	-0.00151667	0.785966	4.99993			-0.000170792	-0.0012931	0.785324	4.99577			-0.000646855	-0.00151667	0.78647	4.99577
-0.000687678	-0.00155043	0.785959	4.99994			-0.000176867	-0.00129175	0.785324	4.99581			-0.000687678	-0.00155043	0.786456	4.99581
-0.000728085	-0.00158362	0.785952	4.99994			-0.000182828	-0.00128971	0.785325	4.99585			-0.000728085	-0.00158362	0.786442	4.99585
-0.000768057	-0.00161622	0.785945	4.99994			-0.00018867	-0.00128699	0.785325	4.99589			-0.000768057	-0.00161622	0.786429	4.99589
-0.000807574	-0.00164823	0.785938	4.99994			-0.000194391	-0.0012836	0.785325	4.99594			-0.000807574	-0.00164823	0.786415	4.99594
-0.000846617	-0.00167962	0.785931	4.99994			-0.000199987	-0.00127958	0.785325	4.99598			-0.000846617	-0.00167962	0.786402	4.99598
-0.000885168	-0.00171039	0.785924	4.99994			-0.000205455	-0.00127492	0.785326	4.99602			-0.000885168	-0.00171039	0.786389	4.99602
-0.000923209	-0.00174052	0.785917	4.99994			-0.000210793	-0.00126964	0.785326	4.99606			-0.000923209	-0.00174052	0.786375	4.99606
-0.000960723	-0.00177	0.78591	4.99994			-0.000215998	-0.00126377	0.785326	4.9961			-0.000960723	-0.00177	0.786362	4.9961
-0.000997694	-0.00179882	0.785904	4.99994			-0.000221067	-0.00125731	0.785327	4.99614			-0.000997694	-0.00179882	0.786349	4.99614
-0.00103411	-0.00182697	0.785897	4.99994			-0.000225998	-0.00125028	0.785327	4.99618			-0.00103411	-0.00182697	0.786336	4.99618
-0.00106995	-0.00185444	0.78589	4.99994			-0.000230789	-0.0012427	0.785327	4.99622			-0.00106995	-0.00185444	0.786324	4.99622
-0.0011052	-0.00188122	0.785884	4.99995			-0.000235438	-0.00123458	0.785327	4.99626			-0.0011052	-0.00188122	0.786311	4.99626
-0.00113984	-0.00190731	0.785877	4.99995			-0.000239943	-0.00122594	0.785328	4.99629			-0.00113984	-0.00190731	0.786298	4.99629
-0.00117388	-0.00193269	0.785871	4.99995			-0.000244302	-0.00121678	0.785328	4.99633			-0.00117388	-0.00193269	0.786286	4.99633
-0.00120728	-0.00195735	0.785864	4.99995			-0.000248513	-0.00120714	0.785328	4.99637			-0.00120728	-0.00195735	0.786273	4.99637
-0.00124005	-0.0019813	0.785858	4.99995			-0.000252576	-0.00119701	0.785329	4.99641			-0.00124005	-0.0019813	0.786261	4.99641
-0.00127216	-0.00200452	0.785851	4.99995			-0.000256487	-0.00118643	0.785329	4.99644			-0.00127216	-0.00200452	0.786249	4.99644
-0.00130361	-0.00202701	0.785845	4.99995			-0.000260248	-0.00117539	0.785329	4.99648			-0.00130361	-0.00202701	0.786237	4.99648
-0.00133439	-0.00204876	0.785839	4.99995			-0.000263855	-0.00116392	0.78533	4.99651			-0.00133439	-0.00204876	0.786225	4.99651
-0.00136449	-0.00206977	0.785833	4.99995			-0.000267309	-0.00115204	0.78533	4.99655			-0.00136449	-0.00206977	0.786213	4.99655
-0.0013939	-0.00209003	0.785827	4.99995			-0.000270608	-0.00113975	0.78533	4.99658			-0.0013939	-0.00209003	0.786201	4.99658
-0.0014226	-0.00210954	0.78582	4.99995			-0.000273752	-0.00112706	0.785331	4.99662			-0.0014226	-0.00210954	0.786189	4.99662
-0.0014506	-0.0021283	0.785814	4.99995			-0.00027674	-0.00111401	0.785331	4.99665			-0.0014506	-0.0021283	0.786177	4.99665
-0.00147789	-0.0021463	0.785808	4.99996			-0.000279571	-0.00110059	0.785332	4.99669			-0.00147789	-0.0021463	0.786166	4.99669
-0.00150445	-0.00216354	0.785802	4.99996			-0.000282246	-0.00108682	0.785332	4.99672			-0.00150445	-0.00216354	0.786154	4.99672
-0.00153028	-0.00218002	0.785797	4.99996			-0.000284763	-0.00107272	0.785332	4.99675			-0.00153028	-0.00218002	0.786143	4.99675
-0.00155538	-0.00219574	0.785791	4.99996			-0.000287123	-0.0010583	0.785333	4.99679			-0.00155538	-0.00219574	0.786132	4.99679
-0.00157974	-0.00221069	0.785785	4.99996			-0.000289326	-0.00104358	0.785333	4.99682			-0.00157974	-0.00221069	0.786121	4.99682
-0.00160336	-0.00222488	0.785779	4.99996			-0.000291371	-0.00102857	0.785333	4.99685			-0.00160336	-0.00222488	0.78611	4.99685
-0.00162622	-0.0022383	0.785773	4.99996			-0.000293259	-0.00101327	0.785334	4.99688			-0.00162622	-0.0022383	0.786099	4.99688
-0.00164834	-0.00225096	0.785768	4.99996			-0.00029499	-0.000997714	0.785334	4.99692			-0.00164834	-0.00225096	0.786088	4.99692
-0.0016697	-0.00226285	0.785762	4.99996			-0.000296564	-0.000981903	0.785335	4.99695			-0.0016697	-0.00226285	0.786077	4.99695
-0.0016903	-0.00227398	0.785757	4.99996			-0.000297982	-0.000965854	0.785335	4.99698			-0.0016903	-0.00227398	0.786066	4.99698
-0.00171014	-0.00228435	0.785751	4.99996			-0.000299244	-0.00094958	0.785335	4.99701			-0.00171014	-0.00228435	0.786056	4.99701
-0.00172921	-0.00229397	0.785746	4.99996			-0.000300351	-0.000933092	0.785336	4.99704			-0.00172921	-0.00229397	0.786045	4.99704
-0.00174753	-0.00230282	0.78574	4.99996			-0.000301304	-0.000916404	0.785336	4.99707			-0.00174753	-0.00230282	0.786035	4.99707
-0.00176508	-0.00231092	0.785735	4.99996			-0.000302103	-0.000899528	0.785337	4.9971			-0.00176508	-0.00231092	0.786025	4.9971
-0.00178186	-0.00231826	0.785729	4.99996			-0.00030275	-0.000882477	0.785337	4.99713			-0.00178186	-0.00231826	0.786014	4.99713
-0.00179787	-0.00232486	0.785724	4.99997			-0.000303245	-0.000865262	0.785337	4.99716			-0.00179787	-0.00232486	0.786004	4.99716
-0.00181312	-0.00233072	0.785719	4.99997			-0.000303589	-0.000847896	0.785338	4.99719			-0.00181312	-0.00233072	0.785994	4.99719
-0.00182761	-0.00233583	0.785714	4.99997			-0.000303783	-0.00083039	0.785338	4.99722			-0.00182761	-0.00233583	0.785985	4.99722
-0.00184133	-0.0023402	0.785709	4.99997			-0.000303829	-0.000812757	0.785339	4.99724			-0.00184133	-0.0023402	0.785975	4.99724
-0.00185429	-0.00234385	0.785704	4.99997			-0.000303728	-0.000795007	0.785339	4.99727			-0.00185429	-0.00234385	0.785965	4.99727
-0.00186649	-0.00234677	0.785698	4.99997			-0.000303481	-0.000777152	0.78534	4.9973			-0.00186649	-0.00234677	0.785955	4.9973
-0.00187793	-0.00234896	0.785693	4.99997			-0.000303089	-0.000759203	0.78534	4.99733			-0.00187793	-0.00234896	0.785946	4.99733
-0.00188861	-0.00235044	0.785689	4.99997			-0.000302555	-0.000741171	0.78534	4.99735			-0.00188861	-0.00235044	0.785937	4.99735
-0.00189854	-0.00235121	0.785684	4.99997			-0.000301879	-0.000723067	0.785341	4.99738			-0.00189854	-0.00235121	0.785927	4.99738
-0.00190773	-0.00235128	0.785679	4.99997			-0.000301063	-0.000704902	0.785341	4.99741			-0.00190773	-0.00235128	0.785918	4.99741
-0.00191616	-0.00235064	0.785674	4.99997			-0.000300109	-0.000686685	0.785342	4.99743			-0.00191616	-0.00235064	0.785909	4.99743
-0.00192386	-0.00234932	0.785669	4.99997			-0.000299019	-0.000668427	0.785342	4.99746			-0.00192386	-0.00234932	0.7859	4.99746
-0.00193082	-0.00234731	0.785665	4.99997			-0.000297794	-0.000650139	0.785343	4.99749			-0.00193082	-0.00234731	0.785891	4.99749
-0.00193705	-0.00234463	0.78566	4.99997			-0.000296436	-0.00063183	0.785343	4.99751			-0.00193705	-0.00234463	0.785882	4.99751
-0.00194255	-0.00234128	0.785655	4.99997			-0.000294946	-0.00061351	0.785344	4.99754			-0.00194255	-0.00234128	0.785873	4.99754
-0.00194732	-0.00233726	0.785651	4.99997			-0.000293328	-0.000595188	0.785344	4.99756			-0.00194732	-0.00233726	0.785865	4.99756
-0.00195138	-0.00233259	0.785646	4.99997			-0.000291583	-0.000576874	0.785344	4.99759			-0.00195138	-0.00233259	0.785856	4.99759
-0.00195473	-0.00232728	0.785642	4.99997			-0.000289712	-0.000558577	0.785345	4.99761			-0.00195473	-0.00232728	0.785848	4.99761
-0.00195738	-0.00232133	0.785637	4.99997			-0.000287718	-0.000540305	0.785345	4.99764			-0.00195738	-0.00232133	0.785839	4.99764
-0.00195933	-0.00231475	0.785633	4.99997			-0.000285603	-0.000522069	0.785346	4.99766			-0.00195933	-0.00231475	0.785831	4.99766
-0.00196058	-0.00230755	0.785629	4.99998			-0.00028337	-0.000503875	0.785346	4.99768			-0.00196058	-0.00230755	0.785823	4.99768
-0.00196116	-0.00229973	0.785624	4.99998			-0.000281019	-0.000485733	0.785347	4.99771			-0.00196116	-0.00229973	0.785815	4.99771
-0.00196105	-0.00229132	0.78562	4.99998			-0.000278554	-0.000467651	0.785347	4.99773			-0.00196105	-0.00229132	0.785807	4.99773
-0.00196028	-0.00228231	0.785616	4.99998			-0.000275977	-0.000449637	0.785347	4.99775			-0.00196028	-0.00228231	0.785799	4.99775
-0.00195884	-0.00227272	0.785612	4.99998			-0.000273289	-0.000431699	0.785348	4.99778			-0.00195884	-0.00227272	0.785791	4.99778
-0.00195675	-0.00226256	0.785608	4.99998			-0.000270494	-0.000413844	0.785348	4.9978			-0.00195675	-0.00226256	0.785783	4.9978
-0.00195401	-0.00225183	0.785604	4.99998			-0.000267594	-0.00039608	0.785349	4.99782			-0.00195401	-0.00225183	0.785775	4.99782
-0.00195064	-0.00224054	0.7856	4.99998			-0.00026459	-0.000378414	0.785349	4.99784			-0.00195064	-0.00224054	0.785768	4.99784
-0.00194663	-0.00222872	0.785596	4.99998			-0.000261486	-0.000360854	0.78535	4.99787			-0.00194663	-0.00222872	0.78576	4.99787
-0.00194201	-0.00221635	0.785592	4.99998			-0.000258283	-0.000343405	0.78535	4.99789			-0.00194201	-0.00221635	0.785753	4.99789
-0.00193677	-0.00220347	0.785588	4.99998			-0.000254984	-0.000326076	0.785351	4.99791			-0.00193677	-0.00220347	0.785746	4.99791
-0.00193093	-0.00219006	0.785584	4.99998			-0.000251592	-0.000308872	0.785351	4.99793			-0.00193093	-0.00219006	0.785738	4.99793
-0.0019245	-0.00217616	0.78558	4.99998			-0.000248109	-0.0002918	0.785351	4.99795			-0.0019245	-0.00217616	0.785731	4.99795
-0.00191748	-0.00216176	0.785577	4.99998			-0.000244537	-0.000274865	0.785352	4.99797			-0.00191748	-0.00216176	0.785724	4.99797
-0.00190989	-0.00214688	0.785573	4.99998			-0.000240879	-0.000258075	0.785352	4.99799			-0.00190989	-0.00214688	0.785717	4.99799
-0.00190173	-0.00213153	0.785569	4.99998			-0.000237137	-0.000241434	0.785353	4.99801			-0.00190173	-0.00213153	0.78571	4.99801
-0.00189302	-0.00211572	0.785566	4.99998			-0.000233314	-0.000224949	0.785353	4.99803			-0.00189302	-0.00211572	0.785703	4.99803
-0.00188376	-0.00209946	0.785562	4.99998			-0.000229413	-0.000208624	0.785354	4.99805			-0.00188376	-0.00209946	0.785697	4.99805
-0.00187396	-0.00208275	0.785558	4.99998			-0.000225435	-0.000192466	0.785354	4.99807			-0.00187396	-0.00208275	0.78569	4.99807
-0.00186364	-0.00206562	0.785555	4.99998			-0.000221384	-0.000176478	0.785355	4.99809			-0.00186364	-0.00206562	0.785684	4.99809
-0.00185281	-0.00204808	0.785552	4.99998			-0.000217262	-0.000160667	0.785355	4.99811			-0.00185281	-0.00204808	0.785677	4.99811
-0.00184147	-0.00203012	0.785548	4.99998			-0.000213071	-0.000145036	0.785355	4.99813			-0.00184147	-0.00203012	0.785671	4.99813
-0.00182964	-0.00201177	0.785545	4.99998			-0.000208814	-0.00012959	0.785356	4.99815			-0.00182964	-0.00201177	0.785664	4.99815
-0.00181732	-0.00199304	0.785541	4.99998			-0.000204493	-0.000114334	0.785356	4.99817			-0.00181732	-0.00199304	0.785658	4.99817
-0.00180453	-0.00197394	0.785538	4.99998			-0.000200112	-9.92722e-05	0.785357	4.99819			-0.00180453	-0.00197394	0.785652	4.99819
-0.00179128	-0.00195447	0.785535	4.99998			-0.000195672	-8.44079e-05	0.785357	4.99821			-0.00179128	-0.00195447	0.785646	4.99821
-0.00177758	-0.00193465	0.785532	4.99998			-0.000191176	-6.97453e-05	0.785358	4.99822			-0.00177758	-0.00193465	0.78564	4.99822
-0.00176343	-0.00191449	0.785529	4.99998			-0.000186626	-5.52881e-05	0.785358	4.99824			-0.00176343	-0.00191449	0.785634	4.99824
-0.00174886	-0.00189401	0.785526	4.99998			-0.000182026	-4.10397e-05	0.785358	4.99826			-0.00174886	-0.00189401	0.785628	4.99826
-0.00173386	-0.0018732	0.785522	4.99998			-0.000177377	-2.70035e-05	0.785359	4.99828			-0.00173386	-0.0018732	0.785622	4.99828
-0.00171846	-0.0018521	0.785519	4.99999			-0.000172682	-1.31828e-05	0.785359	4.9983			-0.00171846	-0.0018521	0.785617	4.9983
-0.00170266	-0.00183069	0.785516	4.99999			-0.000167943	4.19581e-07	0.78536	4.99831			-0.00170266	-0.00183069	0.785611	4.99831
-0.00168648	-0.00180901	0.785514	4.99999			-0.000163164	1.38007e-05	0.78536	4.99833			-0.00168648	-0.00180901	0.785606	4.99833
-0.00166992	-0.00178705	0.785511	4.99999			-0.000158345	2.69578e-05	0.785361	4.99835			-0.00166992	-0.00178705	0.7856	4.99835
-0.00165299	-0.00176482	0.785508	4.99999			-0.000153491	3.98884e-05	0.785361	4.99836			-0.00165299	-0.00176482	0.785595	4.99836
-0.00163571	-0.00174235	0.785505	4.99999			-0.000148603	5.25901e-05	0.785361	4.99838			-0.00163571	-0.00174235	0.78559	4.99838
-0.00161809	-0.00171964	0.785502	4.99999			-0.000143683	6.50607e-05	0.785362	4.9984			-0.00161809	-0.00171964	0.785584	4.9984
-0.00160014	-0.0016967	0.785499	4.99999			-0.000138735	7.72981e-05	0.785362	4.99841			-0.00160014	-0.0016967	0.785579	4.99841
-0.00158187	-0.00167355	0.785497	4.99999			-0.00013376	8.93004e-05	0.785363	4.99843			-0.00158187	-0.00167355	0.785574	4.99843
-0.00156329	-0.00165018	0.785494	4.99999			-0.000128761	0.000101066	0.785363	4.99845			-0.00156329	-0.00165018	0.785569	4.99845
-0.00154441	-0.00162662	0.785491	4.99999			-0.000123739	0.000112593	0.785363	4.99846			-0.00154441	-0.00162662	0.785564	4.99846
-0.00152525	-0.00160288	0.785489	4.99999			-0.000118699	0.000123879	0.785364	4.99848			-0.00152525	-0.00160288	0.785559	4.99848
-0.00150581	-0.00157896	0.785486	4.99999			-0.000113641	0.000134925	0.785364	4.99849			-0.00150581	-0.00157896	0.785555	4.99849
-0.0014861	-0.00155488	0.785484	4.99999			-0.000108568	0.000145728	0.785365	4.99851			-0.0014861	-0.00155488	0.78555	4.99851
-0.00146614	-0.00153064	0.785481	4.99999			-0.000103482	0.000156287	0.785365	4.99852			-0.00146614	-0.00153064	0.785545	4.99852
-0.00144594	-0.00150626	0.785479	4.99999			-9.83853e-05	0.000166602	0.785365	4.99854			-0.00144594	-0.00150626	0.785541	4.99854
-0.0014255	-0.00148175	0.785476	4.99999			-9.32805e-05	0.000176671	0.785366	4.99855			-0.0014255	-0.00148175	0.785536	4.99855
-0.00140484	-0.00145712	0.785474	4.99999			-8.81695e-05	0.000186494	0.785366	4.99857			-0.00140484	-0.00145712	0.785532	4.99857
-0.00138397	-0.00143237	0.785472	4.99999			-8.30544e-05	0.000196071	0.785367	4.99858			-0.00138397	-0.00143237	0.785527	4.99858
-0.0013629	-0.00140753	0.785469	4.99999			-7.79375e-05	0.000205401	0.785367	4.9986			-0.0013629	-0.00140753	0.785523	4.9986
-0.00134164	-0.00138259	0.785467	4.99999			-7.28207e-05	0.000214484	0.785367	4.99861			-0.00134164	-0.00138259	0.785519	4.99861
-0.00132021	-0.00135757	0.785465	4.99999			-6.77062e-05	0.000223319	0.785368	4.99863			-0.00132021	-0.00135757	0.785515	4.99863
-0.0012986	-0.00133247	0.785463	4.99999			-6.25959e-05	0.000231907	0.785368	4.99864			-0.0012986	-0.00133247	0.785511	4.99864
-0.00127683	-0.00130732	0.78546	4.99999			-5.74919e-05	0.000240247	0.785368	4.99865			-0.00127683	-0.00130732	0.785507	4.99865
-0.00125492	-0.00128211	0.785458	4.99999			-5.23962e-05	0.00024834	0.785369	4.99867			-0.00125492	-0.00128211	0.785503	4.99867
-0.00123287	-0.00125686	0.785456	4.99999			-4.73107e-05	0.000256187	0.785369	4.99868			-0.00123287	-0.00125686	0.785499	4.99868
-0.00121069	-0.00123157	0.785454	4.99999			-4.22373e-05	0.000263787	0.78537	4.99869			-0.00121069	-0.00123157	0.785495	4.99869
-0.00118839	-0.00120626	0.785452	4.99999			-3.71779e-05	0.000271141	0.78537	4.99871			-0.00118839	-0.00120626	0.785491	4.99871
-0.00116598	-0.00118094	0.78545	4.99999			-3.21344e-05	0.00027825	0.78537	4.99872			-0.00116598	-0.00118094	0.785487	4.99872
-0.00114348	-0.00115561	0.785448	4.99999			-2.71086e-05	0.000285114	0.785371	4.99873			-0.00114348	-0.00115561	0.785484	4.99873
-0.00112089	-0.00113028	0.785446	4.99999			-2.21023e-05	0.000291735	0.785371	4.99875			-0.00112089	-0.00113028	0.78548	4.99875
-0.00109822	-0.00110496	0.785444	4.99999			-1.71173e-05	0.000298113	0.785371	4.99876			-0.00109822	-0.00110496	0.785477	4.99876
-0.00107548	-0.00107966	0.785442	4.99999			-1.21552e-05	0.000304249	0.785372	4.99877			-0.00107548	-0.00107966	0.785473	4.99877
-0.00105268	-0.00105439	0.785441	4.99999			-7.21778e-06	0.000310145	0.785372	4.99878			-0.00105268	-0.00105439	0.78547	4.99878
-0.00102983	-0.00102916	0.785439	4.99999			-2.30671e-06	0.000315802	0.785372	4.9988			-0.00102983	-0.00102916	0.785466	4.9988
-0.00100694	-0.00100397	0.785437	4.99999			2.57641e-06	0.000321221	0.785373	4.99881			-0.00100694	-0.00100397	0.785463	4.99881
-0.000984019	-0.00097884	0.785435	4.99999			7.42998e-06	0.000326403	0.785373	4.99882			-0.000984019	-0.00097884	0.78546	4.99882
-0.000961074	-0.000953767	0.785434	4.99999			1.22524e-05	0.00033135	0.785373	4.99883			-0.000961074	-0.000953767	0.785457	4.99883
-0.000938115	-0.000928764	0.785432	4.99999			1.70423e-05	0.000336064	0.785374	4.99884			-0.000938115	-0.000928764	0.785454	4.99884
-0.00091515	-0.000903837	0.78543	4.99999			2.1798e-05	0.000340546	0.785374	4.99886			-0.00091515	-0.000903837	0.78545	4.99886
-0.000892189	-0.000878996	0.785429	4.99999			2.65181e-05	0.000344798	0.785374	4.99887			-0.000892189	-0.000878996	0.785447	4.99887
-0.00086924	-0.000854246	0.785427	4.99999			3.12012e-05	0.000348822	0.785375	4.99888			-0.00086924	-0.000854246	0.785444	4.99888
-0.000846311	-0.000829595	0.785425	4.99999			3.58459e-05	0.00035262	0.785375	4.99889			-0.000846311	-0.000829595	0.785442	4.99889
-0.000823411	-0.000805051	0.785424	4.99999			4.0451e-05	0.000356193	0.785375	4.9989			-0.000823411	-0.000805051	0.785439	4.9989
-0.000800547	-0.000780621	0.785422	4.99999			4.50149e-05	0.000359544	0.785376	4.99891			-0.000800547	-0.000780621	0.785436	4.99891
-0.000777727	-0.000756311	0.785421	4.99999			4.95366e-05	0.000362675	0.785376	4.99892			-0.000777727	-0.000756311	0.785433	4.99892
-0.00075496	-0.000732128	0.785419	4.99999			5.40147e-05	0.000365588	0.785376	4.99894			-0.00075496	-0.000732128	0.78543	4.99894
-0.000732253	-0.000708079	0.785418	4.99999			5.8448e-05	0.000368286	0.785377	4.99895			-0.000732253	-0.000708079	0.785428	4.99895
-0.000709613	-0.00068417	0.785416	4.99999			6.28353e-05	0.00037077	0.785377	4.99896			-0.000709613	-0.00068417	0.785425	4.99896
-0.000687049	-0.000660407	0.785415	4.99999			6.71756e-05	0.000373043	0.785377	4.99897			-0.000687049	-0.000660407	0.785423	4.99897
-0.000664567	-0.000636797	0.785414	4.99999			7.14677e-05	0.000375107	0.785378	4.99898			-0.000664567	-0.000636797	0.78542	4.99898
-0.000642174	-0.000613346	0.785412	4.99999			7.57105e-05	0.000376966	0.785378	4.99899			-0.000642174	-0.000613346	0.785418	4.99899
-0.000619879	-0.000590059	0.785411	4.99999			7.99031e-05	0.00037862	0.785378	4.999			-0.000619879	-0.000590059	0.785415	4.999
-0.000597686	-0.000566943	0.78541	4.99999			8.40444e-05	0.000380074	0.785379	4.99901			-0.000597686	-0.000566943	0.785413	4.99901
-0.000575604	-0.000544002	0.785409	4.99999			8.81334e-05	0.00038133	0.785379	4.99902			-0.000575604	-0.000544002	0.785411	4.99902
-0.000553638	-0.000521242	0.785407	4.99999			9.21693e-05	0.000382389	0.785379	4.99903			-0.000553638	-0.000521242	0.785408	4.99903
-0.000531795	-0.000498669	0.785406	4.99999			9.61511e-05	0.000383256	0.785379	4.99904			-0.000531795	-0.000498669	0.785406	4.99904
-0.000510082	-0.000476287	0.785405	4.99999			0.000100078	0.000383933	0.78538	4.99905			-0.000510082	-0.000476287	0.785404	4.99905
-0.000488504	-0.000454101	0.785404	4.99999			0.000103949	0.000384422	0.78538	4.99906			-0.000488504	-0.000454101	0.785402	4.99906
-0.000467069	-0.000432117	0.785403	4.99999			0.000107764	0.000384727	0.78538	4.99907			-0.000467069	-0.000432117	0.7854	4.99907
-0.00044578	-0.000410339	0.785402	4.99999			0.000111521	0.00038485	0.785381	4.99908			-0.00044578	-0.000410339	0.785398	4.99908
-0.000424645	-0.000388771	0.7854	4.99999			0.000115221	0.000384795	0.785381	4.99909			-0.000424645	-0.000388771	0.785396	4.99909
-0.000403668	-0.000367418	0.785399	4.99999			0.000118861	0.000384563	0.785381	4.9991			-0.000403668	-0.000367418	0.785394	4.9991
-0.000382855	-0.000346284	0.785398	4.99999			0.000122443	0.000384159	0.785381	4.99911			-0.000382855	-0.000346284	0.785392	4.99911
-0.000362212	-0.000325373	0.785397	4.99999			0.000125964	0.000383585	0.785382	4.99911			-0.000362212	-0.000325373	0.78539	4.99911
-0.000341743	-0.000304688	0.785396	4.99999			0.000129425	0.000382845	0.785382	4.99912			-0.000341743	-0.000304688	0.785388	4.99912
-0.000321454	-0.000284235	0.785395	4.99999			0.000132825	0.000381941	0.785382	4.99913			-0.000321454	-0.000284235	0.785386	4.99913
-0.000301349	-0.000264016	0.785394	5			0.000136163	0.000380876	0.785383	4.99914			-0.000301349	-0.000264016	0.785385	4.99914
-0.000281433	-0.000244035	0.785393	5			0.00013944	0.000379653	0.785383	4.99915			-0.000281433	-0.000244035	0.785383	4.99915
-0.000261711	-0.000224295	0.785392	5			0.000142653	0.000378277	0.785383	4.99916			-0.000261711	-0.000224295	0.785381	4.99916
-0.000242186	-0.0002048	0.785392	5			0.000145804	0.000376749	0.785383	4.99917			-0.000242186	-0.0002048	0.78538	4.99917
-0.000222864	-0.000185552	0.785391	5			0.000148891	0.000375073	0.785384	4.99918			-0.000222864	-0.000185552	0.785378	4.99918
-0.000203748	-0.000166554	0.78539	5			0.000151915	0.000373252	0.785384	4.99918			-0.000203748	-0.000166554	0.785376	4.99918
-0.000184842	-0.000147809	0.785389	5			0.000154875	0.000371289	0.785384	4.99919			-0.000184842	-0.000147809	0.785375	4.99919
-0.00016615	-0.00012932	0.785388	5			0.00015777	0.000369188	0.785384	4.9992			-0.00016615	-0.00012932	0.785373	4.9992
-0.000147675	-0.00011109	0.785387	5			0.000160601	0.000366952	0.785385	4.99921			-0.000147675	-0.00011109	0.785372	4.99921
-0.000129422	-9.31197e-05	0.785387	5			0.000163367	0.000364583	0.785385	4.99922			-0.000129422	-9.31197e-05	0.78537	4.99922
-0.000111393	-7.54125e-05	0.785386	5			0.000166068	0.000362086	0.785385	4.99922			-0.000111393	-7.54125e-05	0.785369	4.99922
-9.35921e-05	-5.79702e-05	0.785385	5			0.000168703	0.000359463	0.785385	4.99923			-9.35921e-05	-5.79702e-05	0.785368	4.99923
-7.60219e-05	-4.07947e-05	0.785384	5			0.000171273	0.000356717	0.785385	4.99924			-7.60219e-05	-4.07947e-05	0.785366	4.99924
-5.86855e-05	-2.38879e-05	0.785384	5			0.000173778	0.000353852	0.785386	4.99925			-5.86855e-05	-2.38879e-05	0.785365	4.99925
-4.15857e-05	-7.25149e-06	0.785383	5			0.000176217	0.000350872	0.785386	4.99926			-4.15857e-05	-7.25149e-06	0.785364	4.99926
-2.47252e-05	9.11306e-06	0.785382	5			0.000178591	0.000347778	0.785386	4.99926			-2.47252e-05	9.11306e-06	0.785363	4.99926
-8.10647e-06	2.52043e-05	0.785382	5			0.000180899	0.000344575	0.785386	4.99927			-8.10647e-06	2.52043e-05	0.785361	4.99927
8.268e-06	4.10209e-05	0.785381	5			0.000183141	0.000341266	0.785387	4.99928			8.268e-06	4.10209e-05	0.78536	4.99928
2.4396e-05	5.65617e-05	0.78538	5			0.000185317	0.000337854	0.785387	4.99929			2.4396e-05	5.65617e-05	0.785359	4.99929
4.02753e-05	7.18256e-05	0.78538	5			0.000187428	0.000334341	0.785387	4.99929			4.02753e-05	7.18256e-05	0.785358	4.99929
5.59041e-05	8.68118e-05	0.785379	5			0.000189473	0.000330732	0.785387	4.9993			5.59041e-05	8.68118e-05	0.785357	4.9993
7.12803e-05	0.000101519	0.785379	5			0.000191453	0.00032703	0.785387	4.99931			7.12803e-05	0.000101519	0.785356	4.99931
8.64023e-05	0.000115948	0.785378	5			0.000193368	0.000323237	0.785388	4.99931			8.64023e-05	0.000115948	0.785355	4.99931
0.000101268	0.000130096	0.785378	5			0.000195217	0.000319357	0.785388	4.99932			0.000101268	0.000130096	0.785354	4.99932
0.000115877	0.000143964	0.785377	5			0.000197001	0.000315392	0.785388	4.99933			0.000115877	0.000143964	0.785353	4.99933
0.000130227	0.000157552	0.785376	5			0.00019872	0.000311347	0.785388	4.99933			0.000130227	0.000157552	0.785352	4.99933
0.000144318	0.000170859	0.785376	5			0.000200375	0.000307224	0.785388	4.99934			0.000144318	0.000170859	0.785351	4.99934
0.000158147	0.000183885	0.785375	5			0.000201965	0.000303027	0.785389	4.99935			0.000158147	0.000183885	0.78535	4.99935
0.000171714	0.00019663	0.785375	5			0.000203491	0.000298757	0.785389	4.99935			0.000171714	0.00019663	0.78535	4.99935
0.000185018	0.000209094	0.785375	5			0.000204953	0.000294419	0.785389	4.99936			0.000185018	0.000209094	0.785349	4.99936
0.000198058	0.000221277	0.785374	5			0.000206351	0.000290016	0.785389	4.99937			0.000198058	0.000221277	0.785348	4.99937
0.000210835	0.00023318	0.785374	5			0.000207686	0.00028555	0.785389	4.99937			0.000210835	0.00023318	0.785347	4.99937
0.000223346	0.000244803	0.785373	5			0.000208958	0.000281024	0.78539	4.99938			0.000223346	0.000244803	0.785346	4.99938
0.000235592	0.000256147	0.785373	5			0.000210168	0.000276442	0.78539	4.99939			0.000235592	0.000256147	0.785346	4.99939
0.000247573	0.000267212	0.785372	5			0.000211315	0.000271806	0.78539	4.99939			0.000247573	0.000267212	0.785345	4.99939
0.000259287	0.000277999	0.785372	5			0.000212401	0.000267119	0.78539	4.9994			0.000259287	0.000277999	0.785344	4.9994
0.000270736	0.000288509	0.785372	5			0.000213425	0.000262385	0.78539	4.99941			0.000270736	0.000288509	0.785344	4.99941
0.00028192	0.000298742	0.785371	5			0.000214388	0.000257605	0.78539	4.99941			0.00028192	0.000298742	0.785343	4.99941
0.000292837	0.000308701	0.785371	5			0.000215291	0.000252784	0.785391	4.99942			0.000292837	0.000308701	0.785343	4.99942
0.00030349	0.000318384	0.785371	5			0.000216133	0.000247923	0.785391	4.99942			0.00030349	0.000318384	0.785342	4.99942
0.000313877	0.000327795	0.78537	5			0.000216916	0.000243026	0.785391	4.99943			0.000313877	0.000327795	0.785341	4.99943
0.000323999	0.000336934	0.78537	5			0.00021764	0.000238095	0.785391	4.99944			0.000323999	0.000336934	0.785341	4.99944
0.000333858	0.000345803	0.78537	5			0.000218305	0.000233132	0.785391	4.99944			0.000333858	0.000345803	0.78534	4.99944
0.000343453	0.000354402	0.78537	5			0.000218913	0.000228142	0.785391	4.99945			0.000343453	0.000354402	0.78534	4.99945
0.000352785	0.000362734	0.785369	5			0.000219463	0.000223126	0.785392	4.99945			0.000352785	0.000362734	0.785339	4.99945
0.000361855	0.000370801	0.785369	5			0.000219955	0.000218086	0.785392	4.99946			0.000361855	0.000370801	0.785339	4.99946
0.000370665	0.000378602	0.785369	5			0.000220392	0.000213026	0.785392	4.99946			0.000370665	0.000378602	0.785339	4.99946
0.000379214	0.000386142	0.785368	5			0.000220773	0.000207948	0.785392	4.99947			0.000379214	0.000386142	0.785338	4.99947
0.000387504	0.00039342	0.785368	5			0.000221098	0.000202855	0.785392	4.99947			0.000387504	0.00039342	0.785338	4.99947
0.000395537	0.00040044	0.785368	5			0.000221369	0.000197748	0.785392	4.99948			0.000395537	0.00040044	0.785337	4.99948
0.000403313	0.000407203	0.785368	5			0.000221586	0.000192631	0.785393	4.99948			0.000403313	0.000407203	0.785337	4.99948
0.000410834	0.000413711	0.785368	5			0.00022175	0.000187506	0.785393	4.99949			0.000410834	0.000413711	0.785337	4.99949
0.000418101	0.000419966	0.785367	5			0.000221861	0.000182376	0.785393	4.9995			0.000418101	0.000419966	0.785336	4.9995
0.000425116	0.00042597	0.785367	5			0.00022192	0.000177242	0.785393	4.9995			0.000425116	0.00042597	0.785336	4.9995
0.00043188	0.000431726	0.785367	5			0.000221928	0.000172106	0.785393	4.99951			0.00043188	0.000431726	0.785336	4.99951
0.000438395	0.000437236	0.785367	5			0.000221885	0.000166972	0.785393	4.99951			0.000438395	0.000437236	0.785335	4.99951
0.000444663	0.000442502	0.785367	5			0.000221792	0.000161841	0.785393	4.99952			0.000444663	0.000442502	0.785335	4.99952
0.000450685	0.000447526	0.785367	5			0.00022165	0.000156716	0.785394	4.99952			0.000450685	0.000447526	0.785335	4.99952
0.000456464	0.000452311	0.785366	5			0.000221459	0.000151599	0.785394	4.99953			0.000456464	0.000452311	0.785335	4.99953
0.000462	0.00045686	0.785366	5			0.00022122	0.000146491	0.785394	4.99953			0.000462	0.00045686	0.785335	4.99953
0.000467297	0.000461175	0.785366	5			0.000220934	0.000141395	0.785394	4.99953			0.000467297	0.000461175	0.785334	4.99953
0.000472356	0.000465258	0.785366	5			0.000220602	0.000136313	0.785394	4.99954			0.000472356	0.000465258	0.785334	4.99954
0.00047718	0.000469112	0.785366	5			0.000220224	0.000131247	0.785394	4.99954			0.00047718	0.000469112	0.785334	4.99954
0.000481769	0.00047274	0.785366	5			0.000219801	0.000126199	0.785394	4.99955			0.000481769	0.00047274	0.785334	4.99955
0.000486128	0.000476145	0.785366	5			0.000219334	0.000121171	0.785394	4.99955			0.000486128	0.000476145	0.785334	4.99955
0.000490257	0.000479329	0.785366	5			0.000218823	0.000116164	0.785394	4.99956			0.000490257	0.000479329	0.785334	4.99956
0.00049416	0.000482295	0.785366	5			0.00021827	0.000111181	0.785395	4.99956			0.00049416	0.000482295	0.785334	4.99956
0.000497838	0.000485045	0.785366	5			0.000217674	0.000106223	0.785395	4.99957			0.000497838	0.000485045	0.785334	4.99957
0.000501295	0.000487584	0.785366	5			0.000217038	0.000101291	0.785395	4.99957			0.000501295	0.000487584	0.785333	4.99957
0.000504532	0.000489913	0.785365	5			0.00021636	9.63887e-05	0.785395	4.99958			0.000504532	0.000489913	0.785333	4.99958
0.000507552	0.000492036	0.785365	5			0.000215644	9.15165e-05	0.785395	4.99958			0.000507552	0.000492036	0.785333	4.99958
0.000510358	0.000493955	0.785365	5			0.000214888	8.66762e-05	0.785395	4.99958			0.000510358	0.000493955	0.785333	4.99958
0.000512952	0.000495674	0.785365	5			0.000214094	8.18694e-05	0.785395	4.99959			0.000512952	0.000495674	0.785333	4.99959
0.000515336	0.000497196	0.785365	5			0.000213263	7.70977e-05	0.785395	4.99959			0.000515336	0.000497196	0.785333	4.99959
0.000517515	0.000498522	0.785365	5			0.000212395	7.23625e-05	0.785395	4.9996			0.000517515	0.000498522	0.785333	4.9996
0.00051949	0.000499658	0.785365	5			0.000211492	6.76653e-05	0.785396	4.9996			0.00051949	0.000499658	0.785333	4.9996
0.000521263	0.000500605	0.785365	5			0.000210553	6.30076e-05	0.785396	4.99961			0.000521263	0.000500605	0.785333	4.99961
0.000522839	0.000501367	0.785365	5			0.00020958	5.83906e-05	0.785396	4.99961			0.000522839	0.000501367	0.785333	4.99961
0.000524219	0.000501948	0.785365	5			0.000208574	5.38158e-05	0.785396	4.99961			0.000524219	0.000501948	0.785333	4.99961
0.000525407	0.000502349	0.785365	5			0.000207535	4.92844e-05	0.785396	4.99962			0.000525407	0.000502349	0.785333	4.99962
0.000526405	0.000502574	0.785365	5			0.000206464	4.47976e-05	0.785396	4.99962			0.000526405	0.000502574	0.785334	4.99962
0.000527217	0.000502627	0.785365	5			0.000205362	4.03567e-05	0.785396	4.99962			0.000527217	0.000502627	0.785334	4.99962
0.000527844	0.00050251	0.785365	5			0.00020423	3.59629e-05	0.785396	4.99963			0.000527844	0.00050251	0.785334	4.99963
0.000528291	0.000502227	0.785365	5			0.000203069	3.16173e-05	0.785396	4.99963			0.000528291	0.000502227	0.785334	4.99963
0.00052856	0.000501781	0.785365	5			0.000201878	2.73209e-05	0.785396	4.99964			0.00052856	0.000501781	0.785334	4.99964
0.000528654	0.000501175	0.785365	5			0.00020066	2.30749e-05	0.785396	4.99964			0.000528654	0.000501175	0.785334	4.99964
0.000528576	0.000500413	0.785366	5			0.000199414	1.88802e-05	0.785397	4.99964			0.000528576	0.000500413	0.785334	4.99964
0.00052833	0.000499497	0.785366	5			0.000198142	1.47378e-05	0.785397	4.99965			0.00052833	0.000499497	0.785334	4.99965
0.000527918	0.000498431	0.785366	5			0.000196844	1.06487e-05	0.785397	4.99965			0.000527918	0.000498431	0.785334	4.99965
0.000527343	0.000497218	0.785366	5			0.000195522	6.61368e-06	0.785397	4.99965			0.000527343	0.000497218	0.785335	4.99965
0.000526608	0.000495862	0.785366	5			0.000194175	2.63366e-06	0.785397	4.99966			0.000526608	0.000495862	0.785335	4.99966
0.000525717	0.000494365	0.785366	5			0.000192805	-1.29055e-06	0.785397	4.99966			0.000525717	0.000494365	0.785335	4.99966
0.000524672	0.00049273	0.785366	5			0.000191413	-5.15816e-06	0.785397	4.99966			0.000524672	0.00049273	0.785335	4.99966
0.000523477	0.000490962	0.785366	5			0.000189999	-8.96844e-06	0.785397	4.99967			0.000523477	0.000490962	0.785335	4.99967
0.000522134	0.000489062	0.785366	5			0.000188563	-1.27207e-05	0.785397	4.99967			0.000522134	0.000489062	0.785335	4.99967
0.000520648	0.000487035	0.785366	5			0.000187108	-1.64142e-05	0.785397	4.99967			0.000520648	0.000487035	0.785336	4.99967
0.00051902	0.000484884	0.785366	5			0.000185632	-2.00484e-05	0.785397	4.99968			0.00051902	0.000484884	0.785336	4.99968
0.000517255	0.000482611	0.785366	5			0.000184138	-2.36227e-05	0.785397	4.99968			0.000517255	0.000482611	0.785336	4.99968
0.000515354	0.00048022	0.785366	5			0.000182626	-2.71365e-05	0.785397	4.99968			0.000515354	0.00048022	0.785336	4.99968
0.000513322	0.000477715	0.785367	5			0.000181097	-3.05892e-05	0.785398	4.99969			0.000513322	0.000477715	0.785336	4.99969
0.000511161	0.000475097	0.785367	5			0.000179551	-3.39805e-05	0.785398	4.99969			0.000511161	0.000475097	0.785337	4.99969
0.000508875	0.000472371	0.785367	5			0.000177988	-3.73098e-05	0.785398	4.99969			0.000508875	0.000472371	0.785337	4.99969
0.000506467	0.00046954	0.785367	5			0.000176411	-4.05767e-05	0.785398	4.9997			0.000506467	0.00046954	0.785337	4.9997
0.000503939	0.000466606	0.785367	5			0.000174819	-4.37809e-05	0.785398	4.9997			0.000503939	0.000466606	0.785337	4.9997
0.000501295	0.000463573	0.785367	5			0.000173214	-4.69219e-05	0.785398	4.9997			0.000501295	0.000463573	0.785338	4.9997
0.000498538	0.000460444	0.785367	5			0.000171595	-4.99995e-05	0.785398	4.99971			0.000498538	0.000460444	0.785338	4.99971
0.000495671	0.000457222	0.785367	5			0.000169964	-5.30134e-05	0.785398	4.99971			0.000495671	0.000457222	0.785338	4.99971
0.000492697	0.00045391	0.785367	5			0.000168321	-5.59633e-05	0.785398	4.99971			0.000492697	0.00045391	0.785338	4.99971
0.00048962	0.00045051	0.785368	5			0.000166668	-5.88491e-05	0.785398	4.99972			0.00048962	0.00045051	0.785339	4.99972
0.000486441	0.000447027	0.785368	5			0.000165003	-6.16704e-05	0.785398	4.99972			0.000486441	0.000447027	0.785339	4.99972
0.000483165	0.000443463	0.785368	5			0.00016333	-6.44272e-05	0.785398	4.99972			0.000483165	0.000443463	0.785339	4.99972
0.000479793	0.000439821	0.785368	5			0.000161647	-6.71194e-05	0.785398	4.99972			0.000479793	0.000439821	0.78534	4.99972
0.00047633	0.000436104	0.785368	5			0.000159955	-6.97467e-05	0.785398	4.99973			0.00047633	0.000436104	0.78534	4.99973
0.000472779	0.000432315	0.785368	5			0.000158256	-7.23092e-05	0.785398	4.99973			0.000472779	0.000432315	0.78534	4.99973
0.000469141	0.000428456	0.785368	5			0.00015655	-7.48069e-05	0.785398	4.99973			0.000469141	0.000428456	0.785341	4.99973
0.000465421	0.000424531	0.785369	5			0.000154837	-7.72396e-05	0.785398	4.99973			0.000465421	0.000424531	0.785341	4.99973
0.00046162	0.000420543	0.785369	5			0.000153118	-7.96075e-05	0.785399	4.99974			0.00046162	0.000420543	0.785341	4.99974
0.000457743	0.000416493	0.785369	5			0.000151394	-8.19106e-05	0.785399	4.99974			0.000457743	0.000416493	0.785341	4.99974
0.000453792	0.000412386	0.785369	5			0.000149666	-8.41488e-05	0.785399	4.99974			0.000453792	0.000412386	0.785342	4.99974
0.000449769	0.000408224	0.785369	5			0.000147933	-8.63225e-05	0.785399	4.99975			0.000449769	0.000408224	0.785342	4.99975
0.000445678	0.000404009	0.785369	5			0.000146196	-8.84316e-05	0.785399	4.99975			0.000445678	0.000404009	0.785342	4.99975
0.000441521	0.000399745	0.78537	5			0.000144457	-9.04763e-05	0.785399	4.99975			0.000441521	0.000399745	0.785343	4.99975
0.000437302	0.000395433	0.78537	5			0.000142715	-9.24568e-05	0.785399	4.99975			0.000437302	0.000395433	0.785343	4.99975
0.000433022	0.000391077	0.78537	5			0.000140972	-9.43733e-05	0.785399	4.99976			0.000433022	0.000391077	0.785343	4.99976
0.000428685	0.00038668	0.78537	5			0.000139227	-9.6226e-05	0.785399	4.99976			0.000428685	0.00038668	0.785344	4.99976
0.000424294	0.000382243	0.78537	5			0.000137482	-9.80151e-05	0.785399	4.99976			0.000424294	0.000382243	0.785344	4.99976
0.000419851	0.000377769	0.78537	5			0.000135736	-9.9741e-05	0.785399	4.99976			0.000419851	0.000377769	0.785344	4.99976
0.000415359	0.000373261	0.785371	5			0.000133991	-0.000101404	0.785399	4.99977			0.000415359	0.000373261	0.785345	4.99977
0.00041082	0.000368722	0.785371	5			0.000132246	-0.000103004	0.785399	4.99977			0.00041082	0.000368722	0.785345	4.99977
0.000406237	0.000364153	0.785371	5			0.000130503	-0.000104542	0.785399	4.99977			0.000406237	0.000364153	0.785345	4.99977
0.000401613	0.000359557	0.785371	5			0.000128762	-0.000106018	0.785399	4.99977			0.000401613	0.000359557	0.785346	4.99977
0.000396951	0.000354937	0.785371	5			0.000127023	-0.000107432	0.785399	4.99977			0.000396951	0.000354937	0.785346	4.99977
0.000392251	0.000350295	0.785371	5			0.000125287	-0.000108786	0.785399	4.99978			0.000392251	0.000350295	0.785347	4.99978
0.000387519	0.000345633	0.785372	5			0.000123554	-0.000110078	0.785399	4.99978			0.000387519	0.000345633	0.785347	4.99978
0.000382755	0.000340954	0.785372	5			0.000121825	-0.00011131	0.785399	4.99978			0.000382755	0.000340954	0.785347	4.99978
0.000377962	0.000336259	0.785372	5			0.0001201	-0.000112482	0.785399	4.99978			0.000377962	0.000336259	0.785348	4.99978
0.000373142	0.000331552	0.785372	5			0.00011838	-0.000113595	0.785399	4.99979			0.000373142	0.000331552	0.785348	4.99979
0.000368299	0.000326833	0.785372	5			0.000116664	-0.000114649	0.785399	4.99979			0.000368299	0.000326833	0.785348	4.99979
0.000363433	0.000322105	0.785372	5			0.000114954	-0.000115645	0.785399	4.99979			0.000363433	0.000322105	0.785349	4.99979
0.000358548	0.000317371	0.785373	5			0.000113251	-0.000116582	0.785399	4.99979			0.000358548	0.000317371	0.785349	4.99979
0.000353646	0.000312632	0.785373	5			0.000111553	-0.000117463	0.785399	4.99979			0.000353646	0.000312632	0.785349	4.99979
0.000348729	0.000307891	0.785373	5			0.000109862	-0.000118286	0.785399	4.9998			0.000348729	0.000307891	0.78535	4.9998
0.000343799	0.000303149	0.785373	5			0.000108178	-0.000119053	0.785399	4.9998			0.000343799	0.000303149	0.78535	4.9998
0.000338859	0.000298408	0.785373	5			0.000106502	-0.000119765	0.785399	4.9998			0.000338859	0.000298408	0.785351	4.9998
0.00033391	0.00029367	0.785374	5			0.000104834	-0.000120422	0.785399	4.9998			0.00033391	0.00029367	0.785351	4.9998
0.000328954	0.000288938	0.785374	5			0.000103173	-0.000121024	0.785399	4.9998			0.000328954	0.000288938	0.785351	4.9998
0.000323995	0.000284212	0.785374	5			0.000101522	-0.000121572	0.7854	4.99981			0.000323995	0.000284212	0.785352	4.99981
0.000319032	0.000279495	0.785374	5			9.98789e-05	-0.000122067	0.7854	4.99981			0.000319032	0.000279495	0.785352	4.99981
0.00031407	0.000274789	0.785374	5			9.82453e-05	-0.00012251	0.7854	4.99981			0.00031407	0.000274789	0.785352	4.99981
0.000309109	0.000270094	0.785375	5			9.66212e-05	-0.000122901	0.7854	4.99981			0.000309109	0.000270094	0.785353	4.99981
0.000304151	0.000265414	0.785375	5			9.5007e-05	-0.000123241	0.7854	4.99981			0.000304151	0.000265414	0.785353	4.99981
0.000299199	0.000260749	0.785375	5			9.34029e-05	-0.00012353	0.7854	4.99982			0.000299199	0.000260749	0.785354	4.99982
0.000294254	0.0002561	0.785375	5			9.18093e-05	-0.00012377	0.7854	4.99982			0.000294254	0.0002561	0.785354	4.99982
0.000289318	0.000251471	0.785375	5			9.02264e-05	-0.00012396	0.7854	4.99982			0.000289318	0.000251471	0.785354	4.99982
0.000284392	0.000246862	0.785376	5			8.86545e-05	-0.000124102	0.7854	4.99982			0.000284392	0.000246862	0.785355	4.99982
0.000279479	0.000242274	0.785376	5			8.70939e-05	-0.000124196	0.7854	4.99982			0.000279479	0.000242274	0.785355	4.99982
0.00027458	0.00023771	0.785376	5			8.55449e-05	-0.000124244	0.7854	4.99983			0.00027458	0.00023771	0.785356	4.99983
0.000269697	0.000233169	0.785376	5			8.40076e-05	-0.000124245	0.7854	4.99983			0.000269697	0.000233169	0.785356	4.99983
0.000264831	0.000228655	0.785376	5			8.24824e-05	-0.000124201	0.7854	4.99983			0.000264831	0.000228655	0.785356	4.99983
0.000259985	0.000224168	0.785376	5			8.09695e-05	-0.000124112	0.7854	4.99983			0.000259985	0.000224168	0.785357	4.99983
0.000255158	0.00021971	0.785377	5			7.9469e-05	-0.000123979	0.7854	4.99983			0.000255158	0.00021971	0.785357	4.99983
0.000250354	0.000215281	0.785377	5			7.79812e-05	-0.000123803	0.7854	4.99983			0.000250354	0.000215281	0.785357	4.99983
0.000245573	0.000210883	0.785377	5			7.65064e-05	-0.000123584	0.7854	4.99984			0.000245573	0.000210883	0.785358	4.99984
0.000240817	0.000206517	0.785377	5			7.50447e-05	-0.000123324	0.7854	4.99984			0.000240817	0.000206517	0.785358	4.99984
0.000236088	0.000202185	0.785377	5			7.35963e-05	-0.000123023	0.7854	4.99984			0.000236088	0.000202185	0.785359	4.99984
0.000231385	0.000197887	0.785378	5			7.21614e-05	-0.000122682	0.7854	4.99984			0.000231385	0.000197887	0.785359	4.99984
0.000226712	0.000193625	0.785378	5			7.07402e-05	-0.000122301	0.7854	4.99984			0.000226712	0.000193625	0.785359	4.99984
0.000222069	0.000189399	0.785378	5			6.93327e-05	-0.000121882	0.7854	4.99984			0.000222069	0.000189399	0.78536	4.99984
0.000217458	0.00018521	0.785378	5			6.79393e-05	-0.000121426	0.7854	4.99985			0.000217458	0.00018521	0.78536	4.99985
0.000212879	0.000181061	0.785378	5			6.65601e-05	-0.000120932	0.7854	4.99985			0.000212879	0.000181061	0.78536	4.99985
0.000208334	0.00017695	0.785379	5			6.51951e-05	-0.000120402	0.7854	4.99985			0.000208334	0.00017695	0.785361	4.99985
0.000203824	0.00017288	0.785379	5			6.38445e-05	-0.000119837	0.7854	4.99985			0.000203824	0.00017288	0.785361	4.99985
0.00019935	0.000168851	0.785379	5			6.25085e-05	-0.000119238	0.7854	4.99985			0.00019935	0.000168851	0.785362	4.99985
0.000194913	0.000164864	0.785379	5			6.11872e-05	-0.000118605	0.7854	4.99985			0.000194913	0.000164864	0.785362	4.99985
0.000190514	0.00016092	0.785379	5			5.98807e-05	-0.000117938	0.7854	4.99986			0.000190514	0.00016092	0.785362	4.99986
0.000186154	0.00015702	0.78538	5			5.8589e-05	-0.00011724	0.7854	4.99986			0.000186154	0.00015702	0.785363	4.99986
0.000181834	0.000153163	0.78538	5			5.73123e-05	-0.00011651	0.7854	4.99986			0.000181834	0.000153163	0.785363	4.99986
0.000177555	0.000149352	0.78538	5			5.60507e-05	-0.00011575	0.7854	4.99986			0.000177555	0.000149352	0.785363	4.99986
0.000173319	0.000145587	0.78538	5			5.48043e-05	-0.00011496	0.7854	4.99986			0.000173319	0.000145587	0.785364	4.99986
0.000169124	0.000141867	0.78538	5			5.35731e-05	-0.000114141	0.7854	4.99986			0.000169124	0.000141867	0.785364	4.99986
0.000164974	0.000138195	0.78538	5			5.23573e-05	-0.000113294	0.7854	4.99986			0.000164974	0.000138195	0.785364	4.99986
0.000160868	0.00013457	0.785381	5			5.11568e-05	-0.00011242	0.7854	4.99987			0.000160868	0.00013457	0.785365	4.99987
0.000156806	0.000130993	0.785381	5			4.99717e-05	-0.000111519	0.7854	4.99987			0.000156806	0.000130993	0.785365	4.99987
0.000152791	0.000127464	0.785381	5			4.88021e-05	-0.000110593	0.7854	4.99987			0.000152791	0.000127464	0.785366	4.99987
0.000148822	0.000123984	0.785381	5			4.7648e-05	-0.000109641	0.7854	4.99987			0.000148822	0.000123984	0.785366	4.99987
0.0001449	0.000120554	0.785381	5			4.65095e-05	-0.000108666	0.7854	4.99987			0.0001449	0.000120554	0.785366	4.99987
0.000141026	0.000117173	0.785382	5			4.53866e-05	-0.000107667	0.7854	4.99987			0.000141026	0.000117173	0.785367	4.99987
0.0001372	0.000113843	0.785382	5			4.42792e-05	-0.000106645	0.7854	4.99987			0.0001372	0.000113843	0.785367	4.99987
0.000133423	0.000110563	0.785382	5			4.31876e-05	-0.000105602	0.7854	4.99987			0.000133423	0.000110563	0.785367	4.99987
0.000129695	0.000107334	0.785382	5			4.21115e-05	-0.000104537	0.7854	4.99988			0.000129695	0.000107334	0.785368	4.99988
0.000126017	0.000104156	0.785382	5			4.10511e-05	-0.000103452	0.7854	4.99988			0.000126017	0.000104156	0.785368	4.99988
0.00012239	0.000101029	0.785382	5			4.00064e-05	-0.000102348	0.7854	4.99988			0.00012239	0.000101029	0.785368	4.99988
0.000118813	9.79535e-05	0.785383	5			3.89773e-05	-0.000101225	0.7854	4.99988			0.000118813	9.79535e-05	0.785369	4.99988
0.000115288	9.49301e-05	0.785383	5			3.79638e-05	-0.000100084	0.7854	4.99988			0.000115288	9.49301e-05	0.785369	4.99988
0.000111814	9.19586e-05	0.785383	5			3.6966e-05	-9.89262e-05	0.7854	4.99988			0.000111814	9.19586e-05	0.785369	4.99988
0.000108392	8.90392e-05	0.785383	5			3.59837e-05	-9.77516e-05	0.7854	4.99988			0.000108392	8.90392e-05	0.78537	4.99988
0.000105022	8.6172e-05	0.785383	5			3.5017e-05	-9.65612e-05	0.7854	4.99988			0.000105022	8.6172e-05	0.78537	4.99988
0.000101704	8.33572e-05	0.785384	5			3.40659e-05	-9.53557e-05	0.7854	4.99989			0.000101704	8.33572e-05	0.78537	4.99989
9.84397e-05	8.05947e-05	0.785384	5			3.31302e-05	-9.4136e-05	0.7854	4.99989			9.84397e-05	8.05947e-05	0.785371	4.99989
9.52279e-05	7.78848e-05	0.785384	5			3.22101e-05	-9.29027e-05	0.7854	4.99989			9.52279e-05	7.78848e-05	0.785371	4.99989
9.20693e-05	7.52273e-05	0.785384	5			3.13053e-05	-9.16566e-05	0.7854	4.99989			9.20693e-05	7.52273e-05	0.785371	4.99989
8.8964e-05	7.26223e-05	0.785384	5			3.04159e-05	-9.03983e-05	0.7854	4.99989			8.8964e-05	7.26223e-05	0.785372	4.99989
8.59123e-05	7.00697e-05	0.785384	5			2.95418e-05	-8.91286e-05	0.7854	4.99989			8.59123e-05	7.00697e-05	0.785372	4.99989
8.29141e-05	6.75696e-05	0.785385	5			2.86829e-05	-8.78481e-05	0.7854	4.99989			8.29141e-05	6.75696e-05	0.785372	4.99989
7.99696e-05	6.51218e-05	0.785385	5			2.78392e-05	-8.65575e-05	0.7854	4.99989			7.99696e-05	6.51218e-05	0.785373	4.99989
7.70789e-05	6.27263e-05	0.785385	5			2.70106e-05	-8.52576e-05	0.7854	4.99989			7.70789e-05	6.27263e-05	0.785373	4.99989
7.4242e-05	6.03829e-05	0.785385	5			2.61971e-05	-8.39489e-05	0.7854	4.9999			7.4242e-05	6.03829e-05	0.785373	4.9999
7.1459e-05	5.80916e-05	0.785385	5			2.53985e-05	-8.26322e-05	0.7854	4.9999			7.1459e-05	5.80916e-05	0.785374	4.9999
6.87299e-05	5.58521e-05	0.785385	5			2.46148e-05	-8.13081e-05	0.7854	4.9999			6.87299e-05	5.58521e-05	0.785374	4.9999
6.60545e-05	5.36643e-05	0.785386	5			2.38459e-05	-7.99772e-05	0.7854	4.9999			6.60545e-05	5.36643e-05	0.785374	4.9999
6.3433e-05	5.1528e-05	0.785386	5			2.30917e-05	-7.86402e-05	0.7854	4.9999			6.3433e-05	5.1528e-05	0.785375	4.9999
6.08651e-05	4.9443e-05	0.785386	5			2.23521e-05	-7.72978e-05	0.7854	4.9999			6.08651e-05	4.9443e-05	0.785375	4.9999
5.83509e-05	4.74091e-05	0.785386	5			2.16271e-05	-7.59504e-05	0.7854	4.9999			5.83509e-05	4.74091e-05	0.785375	4.9999
5.58902e-05	4.54259e-05	0.785386	5			2.09164e-05	-7.45989e-05	0.7854	4.9999			5.58902e-05	4.54259e-05	0.785375	4.9999
5.34829e-05	4.34934e-05	0.785386	5			2.02201e-05	-7.32437e-05	0.7854	4.9999			5.34829e-05	4.34934e-05	0.785376	4.9999
5.11289e-05	4.1611e-05	0.785386	5			1.95379e-05	-7.18854e-05	0.7854	4.9999			5.11289e-05	4.1611e-05	0.785376	4.9999
4.88278e-05	3.97786e-05	0.785387	5			1.88699e-05	-7.05247e-05	0.7854	4.99991			4.88278e-05	3.97786e-05	0.785376	4.99991
4.65797e-05	3.79959e-05	0.785387	5			1.82159e-05	-6.91622e-05	0.7854	4.99991			4.65797e-05	3.79959e-05	0.785377	4.99991
4.43842e-05	3.62625e-05	0.785387	5			1.75757e-05	-6.77983e-05	0.7854	4.99991			4.43842e-05	3.62625e-05	0.785377	4.99991
4.22411e-05	3.4578e-05	0.785387	5			1.69493e-05	-6.64337e-05	0.7854	4.99991			4.22411e-05	3.4578e-05	0.785377	4.99991
4.01502e-05	3.29421e-05	0.785387	5			1.63365e-05	-6.50688e-05	0.7854	4.99991			4.01502e-05	3.29421e-05	0.785378	4.99991
3.81112e-05	3.13544e-05	0.785387	5			1.57373e-05	-6.37044e-05	0.7854	4.99991			3.81112e-05	3.13544e-05	0.785378	4.99991
3.61239e-05	2.98145e-05	0.785388	5			1.51514e-05	-6.23408e-05	0.7854	4.99991			3.61239e-05	2.98145e-05	0.785378	4.99991
3.41879e-05	2.83221e-05	0.785388	5			1.45788e-05	-6.09786e-05	0.7854	4.99991			3.41879e-05	2.83221e-05	0.785378	4.99991
3.23028e-05	2.68766e-05	0.785388	5			1.40193e-05	-5.96184e-05	0.7854	4.99991			3.23028e-05	2.68766e-05	0.785379	4.99991
3.04685e-05	2.54777e-05	0.785388	5			1.34728e-05	-5.82605e-05	0.7854	4.99991			3.04685e-05	2.54777e-05	0.785379	4.99991
2.86845e-05	2.41249e-05	0.785388	5			1.29392e-05	-5.69056e-05	0.7854	4.99991			2.86845e-05	2.41249e-05	0.785379	4.99991
2.69504e-05	2.28178e-05	0.785388	5			1.24183e-05	-5.55541e-05	0.7854	4.99992			2.69504e-05	2.28178e-05	0.78538	4.99992
2.5266e-05	2.15558e-05	0.785388	5			1.191e-05	-5.42064e-05	0.7854	4.99992			2.5266e-05	2.15558e-05	0.78538	4.99992
2.36307e-05	2.03385e-05	0.785389	5			1.14142e-05	-5.28631e-05	0.7854	4.99992			2.36307e-05	2.03385e-05	0.78538	4.99992
2.20443e-05	1.91655e-05	0.785389	5			1.09306e-05	-5.15246e-05	0.7854	4.99992			2.20443e-05	1.91655e-05	0.78538	4.99992
2.05062e-05	1.80361e-05	0.785389	5			1.04592e-05	-5.01913e-05	0.7854	4.99992			2.05062e-05	1.80361e-05	0.785381	4.99992
1.9016e-05	1.695e-05	0.785389	5			9.99988e-06	-4.88638e-05	0.7854	4.99992			1.9016e-05	1.695e-05	0.785381	4.99992
1.75733e-05	1.59065e-05	0.785389	5			9.5524e-06	-4.75423e-05	0.7854	4.99992			1.75733e-05	1.59065e-05	0.785381	4.99992
1.61777e-05	1.49052e-05	0.785389	5			9.11665e-06	-4.62273e-05	0.7854	4.99992			1.61777e-05	1.49052e-05	0.785381	4.99992
1.48286e-05	1.39455e-05	0.785389	5			8.69247e-06	-4.49193e-05	0.7854	4.99992			1.48286e-05	1.39455e-05	0.785382	4.99992
1.35256e-05	1.30268e-05	0.785389	5			8.27973e-06	-4.36186e-05	0.7854	4.99992			1.35256e-05	1.30268e-05	0.785382	4.99992
1.22682e-05	1.21486e-05	0.78539	5			7.87826e-06	-4.23256e-05	0.7854	4.99992			1.22682e-05	1.21486e-05	0.785382	4.99992
1.10559e-05	1.13104e-05	0.78539	5			7.48791e-06	-4.10407e-05	0.7854	4.99992			1.10559e-05	1.13104e-05	0.785382	4.99992
9.8882e-06	1.05116e-05	0.78539	5			7.10854e-06	-3.97642e-05	0.7854	4.99993			9.8882e-06	1.05116e-05	0.785383	4.99993
8.76454e-06	9.75151e-06	0.78539	5			6.73998e-06	-3.84966e-05	0.7854	4.99993			8.76454e-06	9.75151e-06	0.785383	4.99993
7.68442e-06	9.02967e-06	0.78539	5			6.38209e-06	-3.72381e-05	0.7854	4.99993			7.68442e-06	9.02967e-06	0.785383	4.99993
6.64729e-06	8.34546e-06	0.78539	5			6.0347e-06	-3.59892e-05	0.7854	4.99993			6.64729e-06	8.34546e-06	0.785383	4.99993
5.65261e-06	7.69828e-06	0.78539	5			5.69767e-06	-3.475e-05	0.7854	4.99993			5.65261e-06	7.69828e-06	0.785384	4.99993
4.69982e-06	7.08753e-06	0.78539	5			5.37083e-06	-3.3521e-05	0.7854	4.99993			4.69982e-06	7.08753e-06	0.785384	4.99993
3.78836e-06	6.51262e-06	0.785391	5			5.05403e-06	-3.23024e-05	0.7854	4.99993			3.78836e-06	6.51262e-06	0.785384	4.99993
2.91766e-06	5.97292e-06	0.785391	5			4.74711e-06	-3.10946e-05	0.7854	4.99993			2.91766e-06	5.97292e-06	0.785384	4.99993
2.08715e-06	5.46784e-06	0.785391	5			4.44991e-06	-2.98979e-05	0.7854	4.99993			2.08715e-06	5.46784e-06	0.785384	4.99993
1.29624e-06	4.99675e-06	0.785391	5			4.16228e-06	-2.87124e-05	0.7854	4.99993			1.29624e-06	4.99675e-06	0.785385	4.99993
5.44346e-07	4.55903e-06	0.785391	5			3.88406e-06	-2.75386e-05	0.7854	4.99993			5.44346e-07	4.55903e-06	0.785385	4.99993
-1.69129e-07	4.15407e-06	0.785391	5			3.61508e-06	-2.63766e-05	0.7854	4.99993			-1.69129e-07	4.15407e-06	0.785385	4.99993
-8.44783e-07	3.78124e-06	0.785391	5			3.35519e-06	-2.52267e-05	0.7854	4.99993			-8.44783e-07	3.78124e-06	0.785385	4.99993
-1.48322e-06	3.43991e-06	0.785391	5			3.10423e-06	-2.40891e-05	0.7854	4.99993			-1.48322e-06	3.43991e-06	0.785386	4.99993
-2.08505e-06	3.12946e-06	0.785392	5			2.86205e-06	-2.29642e-05	0.7854	4.99994			-2.08505e-06	3.12946e-06	0.785386	4.99994
-2.65088e-06	2.84925e-06	0.785392	5			2.62848e-06	-2.1852e-05	0.7854	4.99994			-2.65088e-06	2.84925e-06	0.785386	4.99994
-3.18134e-06	2.59865e-06	0.785392	5			2.40337e-06	-2.07528e-05	0.785399	4.99994			-3.18134e-06	2.59865e-06	0.785386	4.99994
-3.67703e-06	2.37703e-06	0.785392	5			2.18656e-06	-1.96669e-05	0.785399	4.99994			-3.67703e-06	2.37703e-06	0.785386	4.99994
-4.13859e-06	2.18376e-06	0.785392	5			1.97789e-06	-1.85944e-05	0.785399	4.99994			-4.13859e-06	2.18376e-06	0.785387	4.99994
-4.56664e-06	2.0182e-06	0.785392	5			1.77721e-06	-1.75355e-05	0.785399	4.99994			-4.56664e-06	2.0182e-06	0.785387	4.99994
-4.96181e-06	1.87971e-06	0.785392	5			1.58436e-06	-1.64903e-05	0.785399	4.99994			-4.96181e-06	1.87971e-06	0.785387	4.99994
-5.32472e-06	1.76768e-06	0.785392	5			1.39917e-06	-1.54591e-05	0.785399	4.99994			-5.32472e-06	1.76768e-06	0.785387	4.99994
-5.65602e-06	1.68145e-06	0.785392	5			1.22151e-06	-1.44421e-05	0.785399	4.99994			-5.65602e-06	1.68145e-06	0.785387	4.99994
-5.95633e-06	1.62041e-06	0.785392	5			1.05121e-06	-1.34393e-05	0.785399	4.99994			-5.95633e-06	1.62041e-06	0.785388	4.99994
-6.22629e-06	1.58391e-06	0.785393	5			8.8812e-07	-1.24508e-05	0.785399	4.99994			-6.22629e-06	1.58391e-06	0.785388	4.99994
-6.46654e-06	1.57134e-06	0.785393	5			7.32083e-07	-1.1477e-05	0.785399	4.99994			-6.46654e-06	1.57134e-06	0.785388	4.99994
-6.6777e-06	1.58205e-06	0.785393	5			5.8295e-07	-1.05178e-05	0.785399	4.99994			-6.6777e-06	1.58205e-06	0.785388	4.99994
-6.86043e-06	1.61542e-06	0.785393	5			4.40568e-07	-9.57339e-06	0.785399	4.99994			-6.86043e-06	1.61542e-06	0.785388	4.99994
-7.01535e-06	1.67084e-06	0.785393	5			3.04785e-07	-8.64388e-06	0.785399	4.99994			-7.01535e-06	1.67084e-06	0.785389	4.99994
-7.1431e-06	1.74767e-06	0.785393	5			1.75452e-07	-7.72938e-06	0.785399	4.99994			-7.1431e-06	1.74767e-06	0.785389	4.99994
-7.24431e-06	1.84529e-06	0.785393	5			5.24201e-08	-6.82996e-06	0.785399	4.99995			-7.24431e-06	1.84529e-06	0.785389	4.99995
-7.31963e-06	1.9631e-06	0.785393	5			-6.44595e-08	-5.94573e-06	0.785399	4.99995			-7.31963e-06	1.9631e-06	0.785389	4.99995
-7.36968e-06	2.10047e-06	0.785393	5			-1.75334e-07	-5.07675e-06	0.785399	4.99995			-7.36968e-06	2.10047e-06	0.785389	4.99995
-7.3951e-06	2.2568e-06	0.785393	5			-2.80349e-07	-4.22311e-06	0.785399	4.99995			-7.3951e-06	2.2568e-06	0.785389	4.99995
-7.39652e-06	2.43147e-06	0.785394	5			-3.79649e-07	-3.38486e-06	0.785399	4.99995			-7.39652e-06	2.43147e-06	0.78539	4.99995
-7.37456e-06	2.6239e-06	0.785394	5			-4.73379e-07	-2.56205e-06	0.785399	4.99995			-7.37456e-06	2.6239e-06	0.78539	4.99995
-7.32986e-06	2.83346e-06	0.785394	5			-5.61681e-07	-1.75474e-06	0.785399	4.99995			-7.32986e-06	2.83346e-06	0.78539	4.99995
-7.26303e-06	3.05958e-06	0.785394	5			-6.44696e-07	-9.62972e-07	0.785399	4.99995			-7.26303e-06	3.05958e-06	0.78539	4.99995
-7.1747e-06	3.30166e-06	0.785394	5			-7.22565e-07	-1.86773e-07	0.785399	4.99995			-7.1747e-06	3.30166e-06	0.78539	4.99995
-7.06549e-06	3.5591e-06	0.785394	5			-7.95427e-07	5.73828e-07	0.785399	4.99995			-7.06549e-06	3.5591e-06	0.78539	4.99995
-6.93601e-06	3.83134e-06	0.785394	5			-8.63418e-07	1.31881e-06	0.785399	4.99995			-6.93601e-06	3.83134e-06	0.785391	4.99995
-6.78687e-06	4.1178e-06	0.785394	5			-9.26676e-07	2.04816e-06	0.785399	4.99995			-6.78687e-06	4.1178e-06	0.785391	4.99995
-6.61869e-06	4.41789e-06	0.785394	5			-9.85334e-07	2.76188e-06	0.785399	4.99995			-6.61869e-06	4.41789e-06	0.785391	4.99995
-6.43207e-06	4.73106e-06	0.785394	5			-1.03953e-06	3.45995e-06	0.785399	4.99995			-6.43207e-06	4.73106e-06	0.785391	4.99995
-6.2276e-06	5.05674e-06	0.785394	5			-1.08939e-06	4.1424e-06	0.785399	4.99995			-6.2276e-06	5.05674e-06	0.785391	4.99995
-6.0059e-06	5.39438e-06	0.785394	5			-1.13504e-06	4.80923e-06	0.785399	4.99995			-6.0059e-06	5.39438e-06	0.785391	4.99995
-5.76754e-06	5.74342e-06	0.785395	5			-1.17663e-06	5.46046e-06	0.785399	4.99995			-5.76754e-06	5.74342e-06	0.785392	4.99995
-5.51312e-06	6.10333e-06	0.785395	5			-1.21426e-06	6.09611e-06	0.785399	4.99995			-5.51312e-06	6.10333e-06	0.785392	4.99995
-5.24322e-06	6.47356e-06	0.785395	5			-1.24808e-06	6.71623e-06	0.785399	4.99995			-5.24322e-06	6.47356e-06	0.785392	4.99995
-4.95843e-06	6.85358e-06	0.785395	5			-1.2782e-06	7.32083e-06	0.785399	4.99995			-4.95843e-06	6.85358e-06	0.785392	4.99995
-4.6593e-06	7.24287e-06	0.785395	5			-1.30475e-06	7.90998e-06	0.785399	4.99996			-4.6593e-06	7.24287e-06	0.785392	4.99996
-4.34642e-06	7.6409e-06	0.785395	5			-1.32784e-06	8.48372e-06	0.785399	4.99996			-4.34642e-06	7.6409e-06	0.785392	4.99996
-4.02034e-06	8.04717e-06	0.785395	5			-1.3476e-06	9.04209e-06	0.785399	4.99996			-4.02034e-06	8.04717e-06	0.785392	4.99996
-3.68163e-06	8.46115e-06	0.785395	5			-1.36415e-06	9.58517e-06	0.785399	4.99996			-3.68163e-06	8.46115e-06	0.785393	4.99996
-3.33083e-06	8.88237e-06	0.785395	5			-1.37761e-06	1.0113e-05	0.785399	4.99996			-3.33083e-06	8.88237e-06	0.785393	4.99996
-2.96849e-06	9.31031e-06	0.785395	5			-1.38807e-06	1.06257e-05	0.785399	4.99996			-2.96849e-06	9.31031e-06	0.785393	4.99996
-2.59515e-06	9.7445e-06	0.785395	5			-1.39567e-06	1.11233e-05	0.785399	4.99996			-2.59515e-06	9.7445e-06	0.785393	4.99996
-2.21135e-06	1.01845e-05	0.785395	5			-1.40052e-06	1.16059e-05	0.785399	4.99996			-2.21135e-06	1.01845e-05	0.785393	4.99996
-1.81761e-06	1.06297e-05	0.785395	5			-1.40271e-06	1.20735e-05	0.785399	4.99996			-1.81761e-06	1.06297e-05	0.785393	4.99996
-1.41445e-06	1.10798e-05	0.785395	5			-1.40236e-06	1.25263e-05	0.785399	4.99996			-1.41445e-06	1.10798e-05	0.785393	4.99996
-1.0024e-06	1.15342e-05	0.785396	5			-1.39958e-06	1.29644e-05	0.785399	4.99996			-1.0024e-06	1.15342e-05	0.785393	4.99996
-5.81955e-07	1.19926e-05	0.785396	5			-1.39448e-06	1.33879e-05	0.785399	4.99996			-5.81955e-07	1.19926e-05	0.785394	4.99996
-1.53622e-07	1.24544e-05	0.785396	5			-1.38714e-06	1.37968e-05	0.785399	4.99996			-1.53622e-07	1.24544e-05	0.785394	4.99996
2.82103e-07	1.29193e-05	0.785396	5			-1.37768e-06	1.41912e-05	0.785399	4.99996			2.82103e-07	1.29193e-05	0.785394	4.99996
7.24734e-07	1.33868e-05	0.785396	5			-1.36619e-06	1.45714e-05	0.785399	4.99996			7.24734e-07	1.33868e-05	0.785394	4.99996
1.17379e-06	1.38565e-05	0.785396	5			-1.35278e-06	1.49373e-05	0.785399	4.99996			1.17379e-06	1.38565e-05	0.785394	4.99996
1.62879e-06	1.43279e-05	0.785396	5			-1.33753e-06	1.52892e-05	0.785399	4.99996			1.62879e-06	1.43279e-05	0.785394	4.99996
2.08927e-06	1.48008e-05	0.785396	5			-1.32055e-06	1.56271e-05	0.785399	4.99996			2.08927e-06	1.48008e-05	0.785394	4.99996
2.55477e-06	1.52746e-05	0.785396	5			-1.30192e-06	1.59511e-05	0.785399	4.99996			2.55477e-06	1.52746e-05	0.785394	4.99996
3.02484e-06	1.57489e-05	0.785396	5			-1.28174e-06	1.62615e-05	0.785399	4.99996			3.02484e-06	1.57489e-05	0.785394	4.99996
3.49903e-06	1.62235e-05	0.785396	5			-1.26009e-06	1.65583e-05	0.785399	4.99996			3.49903e-06	1.62235e-05	0.785395	4.99996
3.9769e-06	1.66979e-05	0.785396	5			-1.23706e-06	1.68416e-05	0.785399	4.99996			3.9769e-06	1.66979e-05	0.785395	4.99996
4.45803e-06	1.71718e-05	0.785396	5			-1.21273e-06	1.71116e-05	0.785399	4.99996			4.45803e-06	1.71718e-05	0.785395	4.99996
4.94198e-06	1.76448e-05	0.785396	5			-1.1872e-06	1.73685e-05	0.785399	4.99996			4.94198e-06	1.76448e-05	0.785395	4.99996
5.42835e-06	1.81165e-05	0.785396	5			-1.16054e-06	1.76124e-05	0.785399	4.99997			5.42835e-06	1.81165e-05	0.785395	4.99997
5.91672e-06	1.85867e-05	0.785396	5			-1.13284e-06	1.78434e-05	0.785399	4.99997			5.91672e-06	1.85867e-05	0.785395	4.99997
6.40669e-06	1.90549e-05	0.785396	5			-1.10416e-06	1.80617e-05	0.785399	4.99997			6.40669e-06	1.90549e-05	0.785395	4.99997
6.89788e-06	1.95209e-05	0.785397	5			-1.07459e-06	1.82674e-05	0.785399	4.99997			6.89788e-06	1.95209e-05	0.785395	4.99997
7.38989e-06	1.99842e-05	0.785397	5			-1.0442e-06	1.84607e-05	0.785399	4.99997			7.38989e-06	1.99842e-05	0.785395	4.99997
7.88234e-06	2.04448e-05	0.785397	5			-1.01307e-06	1.86418e-05	0.785399	4.99997			7.88234e-06	2.04448e-05	0.785395	4.99997
8.37488e-06	2.09021e-05	0.785397	5			-9.81267e-07	1.88108e-05	0.785399	4.99997			8.37488e-06	2.09021e-05	0.785396	4.99997
8.86713e-06	2.13559e-05	0.785397	5			-9.48858e-07	1.89679e-05	0.785399	4.99997			8.86713e-06	2.13559e-05	0.785396	4.99997
9.35874e-06	2.1806e-05	0.785397	5			-9.15914e-07	1.91132e-05	0.785399	4.99997			9.35874e-06	2.1806e-05	0.785396	4.99997
9.84936e-06	2.2252e-05	0.785397	5			-8.82501e-07	1.9247e-05	0.785399	4.99997			9.84936e-06	2.2252e-05	0.785396	4.99997
1.03387e-05	2.26937e-05	0.785397	5			-8.48683e-07	1.93693e-05	0.785399	4.99997			1.03387e-05	2.26937e-05	0.785396	4.99997
1.08263e-05	2.31308e-05	0.785397	5			-8.14523e-07	1.94804e-05	0.785399	4.99997			1.08263e-05	2.31308e-05	0.785396	4.99997
1.1312e-05	2.35631e-05	0.785397	5			-7.80083e-07	1.95804e-05	0.785399	4.99997			1.1312e-05	2.35631e-05	0.785396	4.99997
1.17953e-05	2.39902e-05	0.785397	5			-7.45421e-07	1.96695e-05	0.785399	4.99997			1.17953e-05	2.39902e-05	0.785396	4.99997
1.22761e-05	2.44121e-05	0.785397	5			-7.10596e-07	1.97478e-05	0.785399	4.99997			1.22761e-05	2.44121e-05	0.785396	4.99997
1.2754e-05	2.48284e-05	0.785397	5			-6.75664e-07	1.98156e-05	0.785399	4.99997			1.2754e-05	2.48284e-05	0.785396	4.99997
1.32287e-05	2.52389e-05	0.785397	5			-6.4068e-07	1.9873e-05	0.785399	4.99997			1.32287e-05	2.52389e-05	0.785396	4.99997
1.36999e-05	2.56434e-05	0.785397	5			-6.05697e-07	1.99203e-05	0.785399	4.99997			1.36999e-05	2.56434e-05	0.785397	4.99997
1.41673e-05	2.60417e-05	0.785397	5			-5.70765e-07	1.99575e-05	0.785399	4.99997			1.41673e-05	2.60417e-05	0.785397	4.99997
1.46308e-05	2.64335e-05	0.785397	5			-5.35936e-07	1.99848e-05	0.785399	4.99997			1.46308e-05	2.64335e-05	0.785397	4.99997
1.50899e-05	2.68188e-05	0.785397	5			-5.01256e-07	2.00025e-05	0.785399	4.99997			1.50899e-05	2.68188e-05	0.785397	4.99997
1.55445e-05	2.71972e-05	0.785397	5			-4.66773e-07	2.00108e-05	0.785399	4.99997			1.55445e-05	2.71972e-05	0.785397	4.99997
1.59944e-05	2.75687e-05	0.785397	5			-4.32532e-07	2.00097e-05	0.785399	4.99997			1.59944e-05	2.75687e-05	0.785397	4.99997
1.64392e-05	2.7933e-05	0.785397	5			-3.98576e-07	1.99995e-05	0.785399	4.99997			1.64392e-05	2.7933e-05	0.785397	4.99997
1.68788e-05	2.829e-05	0.785397	5			-3.64947e-07	1.99804e-05	0.785399	4.99997			1.68788e-05	2.829e-05	0.785397	4.99997
1.73129e-05	2.86395e-05	0.785397	5			-3.31686e-07	1.99526e-05	0.785399	4.99997			1.73129e-05	2.86395e-05	0.785397	4.99997
1.77413e-05	2.89814e-05	0.785398	5			-2.98832e-07	1.99162e-05	0.785399	4.99997			1.77413e-05	2.89814e-05	0.785397	4.99997
1.81638e-05	2.93155e-05	0.785398	5			-2.66422e-07	1.98714e-05	0.785399	4.99997			1.81638e-05	2.93155e-05	0.785397	4.99997
1.85802e-05	2.96417e-05	0.785398	5			-2.34493e-07	1.98185e-05	0.785399	4.99997			1.85802e-05	2.96417e-05	0.785397	4.99997
1.89904e-05	2.99599e-05	0.785398	5			-2.03079e-07	1.97575e-05	0.785399	4.99997			1.89904e-05	2.99599e-05	0.785397	4.99997
1.9394e-05	3.02699e-05	0.785398	5			-1.72214e-07	1.96887e-05	0.785399	4.99997			1.9394e-05	3.02699e-05	0.785397	4.99997
1.9791e-05	3.05717e-05	0.785398	5			-1.41928e-07	1.96123e-05	0.785399	4.99997			1.9791e-05	3.05717e-05	0.785397	4.99997
2.01812e-05	3.0865e-05	0.785398	5			-1.12254e-07	1.95284e-05	0.785399	4.99997			2.01812e-05	3.0865e-05	0.785398	4.99997
2.05645e-05	3.11499e-05	0.785398	5			-8.32189e-08	1.94373e-05	0.785399	4.99998			2.05645e-05	3.11499e-05	0.785398	4.99998
2.09405e-05	3.14262e-05	0.785398	5			-5.48516e-08	1.9339e-05	0.785399	4.99998			2.09405e-05	3.14262e-05	0.785398	4.99998
2.13093e-05	3.16938e-05	0.785398	5			-2.71781e-08	1.92339e-05	0.785399	4.99998			2.13093e-05	3.16938e-05	0.785398	4.99998
2.16707e-05	3.19526e-05	0.785398	5			-2.23729e-10	1.91221e-05	0.785399	4.99998			2.16707e-05	3.19526e-05	0.785398	4.99998
2.20244e-05	3.22027e-05	0.785398	5			2.59879e-08	1.90037e-05	0.785399	4.99998			2.20244e-05	3.22027e-05	0.785398	4.99998
2.23705e-05	3.24438e-05	0.785398	5			5.14341e-08	1.88789e-05	0.785399	4.99998			2.23705e-05	3.24438e-05	0.785398	4.99998
2.27088e-05	3.26759e-05	0.785398	5			7.60938e-08	1.8748e-05	0.785399	4.99998			2.27088e-05	3.26759e-05	0.785398	4.99998
2.30391e-05	3.28991e-05	0.785398	5			9.99469e-08	1.86111e-05	0.785399	4.99998			2.30391e-05	3.28991e-05	0.785398	4.99998
2.33613e-05	3.31131e-05	0.785398	5			1.22974e-07	1.84684e-05	0.785399	4.99998			2.33613e-05	3.31131e-05	0.785398	4.99998
2.36754e-05	3.3318e-05	0.785398	5			1.45159e-07	1.83201e-05	0.785399	4.99998			2.36754e-05	3.3318e-05	0.785398	4.99998
2.39813e-05	3.35138e-05	0.785398	5			1.66484e-07	1.81663e-05	0.785399	4.99998			2.39813e-05	3.35138e-05	0.785398	4.99998
2.42789e-05	3.37004e-05	0.785398	5			1.86934e-07	1.80072e-05	0.785399	4.99998			2.42789e-05	3.37004e-05	0.785398	4.99998
2.4568e-05	3.38777e-05	0.785398	5			2.06495e-07	1.7843e-05	0.785399	4.99998			2.4568e-05	3.38777e-05	0.785398	4.99998
2.48486e-05	3.40458e-05	0.785398	5			2.25154e-07	1.76739e-05	0.785399	4.99998			2.48486e-05	3.40458e-05	0.785398	4.99998
2.51206e-05	3.42046e-05	0.785398	5			2.42899e-07	1.75e-05	0.785399	4.99998			2.51206e-05	3.42046e-05	0.785398	4.99998
2.53841e-05	3.43541e-05	0.785398	5			2.59719e-07	1.73216e-05	0.785399	4.99998			2.53841e-05	3.43541e-05	0.785398	4.99998
2.56388e-05	3.44944e-05	0.785398	5			2.75604e-07	1.71387e-05	0.785399	4.99998			2.56388e-05	3.44944e-05	0.785398	4.99998
2.58848e-05	3.46254e-05	0.785398	5			2.90546e-07	1.69516e-05	0.785399	4.99998			2.58848e-05	3.46254e-05	0.785398	4.99998
2.6122e-05	3.4747e-05	0.785398	5			3.04537e-07	1.67604e-05	0.785399	4.99998			2.6122e-05	3.4747e-05	0.785398	4.99998
2.63503e-05	3.48594e-05	0.785398	5			3.17569e-07	1.65653e-05	0.785399	4.99998			2.63503e-05	3.48594e-05	0.785398	4.99998
2.65698e-05	3.49626e-05	0.785398	5			3.29637e-07	1.63665e-05	0.785399	4.99998			2.65698e-05	3.49626e-05	0.785399	4.99998
2.67804e-05	3.50564e-05	0.785398	5			3.40736e-07	1.61641e-05	0.785399	4.99998			2.67804e-05	3.50564e-05	0.785399	4.99998
2.69821e-05	3.51411e-05	0.785398	5			3.50863e-07	1.59582e-05	0.785399	4.99998			2.69821e-05	3.51411e-05	0.785399	4.99998
2.71748e-05	3.52166e-05	0.785398	5			3.60014e-07	1.57491e-05	0.785399	4.99998			2.71748e-05	3.52166e-05	0.785399	4.99998
2.73586e-05	3.52829e-05	0.785398	5			3.68186e-07	1.5537e-05	0.785398	4.99998			2.73586e-05	3.52829e-05	0.785399	4.99998
2.75334e-05	3.534e-05	0.785398	5			3.75379e-07	1.53218e-05	0.785398	4.99998			2.75334e-05	3.534e-05	0.785399	4.99998
2.76992e-05	3.53881e-05	0.785398	5			3.81593e-07	1.51039e-05	0.785398	4.99998			2.76992e-05	3.53881e-05	0.785399	4.99998
2.7856e-05	3.54271e-05	0.785398	5			3.86827e-07	1.48834e-05	0.785398	4.99998			2.7856e-05	3.54271e-05	0.785399	4.99998
2.80039e-05	3.54572e-05	0.785398	5			3.91082e-07	1.46604e-05	0.785398	4.99998			2.80039e-05	3.54572e-05	0.785399	4.99998
2.81428e-05	3.54783e-05	0.785398	5			3.94362e-07	1.4435e-05	0.785398	4.99998			2.81428e-05	3.54783e-05	0.785399	4.99998
2.82728e-05	3.54905e-05	0.785398	5			3.96667e-07	1.42075e-05	0.785398	4.99998			2.82728e-05	3.54905e-05	0.785399	4.99998
2.83939e-05	3.54939e-05	0.785398	5			3.98003e-07	1.39779e-05	0.785398	4.99998			2.83939e-05	3.54939e-05	0.785399	4.99998
2.8506e-05	3.54885e-05	0.785399	5			3.98372e-07	1.37465e-05	0.785398	4.99998			2.8506e-05	3.54885e-05	0.785399	4.99998
2.86093e-05	3.54744e-05	0.785399	5			3.97781e-07	1.35133e-05	0.785398	4.99998			2.86093e-05	3.54744e-05	0.785399	4.99998
2.87038e-05	3.54517e-05	0.785399	5			3.96234e-07	1.32785e-05	0.785398	4.99998			2.87038e-05	3.54517e-05	0.785399	4.99998
2.87894e-05	3.54205e-05	0.785399	5			3.93737e-07	1.30422e-05	0.785398	4.99998			2.87894e-05	3.54205e-05	0.785399	4.99998
2.88663e-05	3.53807e-05	0.785399	5			3.90298e-07	1.28047e-05	0.785398	4.99998			2.88663e-05	3.53807e-05	0.785399	4.99998
2.89345e-05	3.53326e-05	0.785399	5			3.85925e-07	1.25659e-05	0.785398	4.99998			2.89345e-05	3.53326e-05	0.785399	4.99998
2.8994e-05	3.52762e-05	0.785399	5			3.80624e-07	1.2326e-05	0.785398	4.99998			2.8994e-05	3.52762e-05	0.785399	4.99998
2.90449e-05	3.52116e-05	0.785399	5			3.74405e-07	1.20853e-05	0.785398	4.99998			2.90449e-05	3.52116e-05	0.785399	4.99998
2.90872e-05	3.51389e-05	0.785399	5			3.67277e-07	1.18437e-05	0.785398	4.99998			2.90872e-05	3.51389e-05	0.785399	4.99998
2.9121e-05	3.50581e-05	0.785399	5			3.5925e-07	1.16015e-05	0.785398	4.99998			2.9121e-05	3.50581e-05	0.785399	4.99998
2.91464e-05	3.49694e-05	0.785399	5			3.50334e-07	1.13587e-05	0.785398	4.99998			2.91464e-05	3.49694e-05	0.785399	4.99998
2.91635e-05	3.48728e-05	0.785399	5			3.4054e-07	1.11155e-05	0.785398	4.99998			2.91635e-05	3.48728e-05	0.785399	4.99998
2.91722e-05	3.47685e-05	0.785399	5			3.29879e-07	1.08719e-05	0.785398	4.99998			2.91722e-05	3.47685e-05	0.785399	4.99998
2.91727e-05	3.46566e-05	0.785399	5			3.18363e-07	1.06282e-05	0.785398	4.99998			2.91727e-05	3.46566e-05	0.785399	4.99998
2.91651e-05	3.45371e-05	0.785399	5			3.06005e-07	1.03844e-05	0.785398	4.99998			2.91651e-05	3.45371e-05	0.785399	4.99998
2.91494e-05	3.44102e-05	0.785399	5			2.92816e-07	1.01407e-05	0.785398	4.99998			2.91494e-05	3.44102e-05	0.785399	4.99998
2.91257e-05	3.4276e-05	0.785399	5			2.7881e-07	9.89711e-06	0.785398	4.99998			2.91257e-05	3.4276e-05	0.785399	4.99998
2.90941e-05	3.41347e-05	0.785399	5			2.64001e-07	9.65378e-06	0.785398	4.99998			2.90941e-05	3.41347e-05	0.785399	4.99998
2.90547e-05	3.39862e-05	0.785399	5			2.48401e-07	9.41082e-06	0.785398	4.99999			2.90547e-05	3.39862e-05	0.785399	4.99999
2.90075e-05	3.38307e-05	0.785399	5			2.32027e-07	9.16834e-06	0.785398	4.99999			2.90075e-05	3.38307e-05	0.785399	4.99999
2.89528e-05	3.36685e-05	0.785399	5			2.14891e-07	8.92643e-06	0.785398	4.99999			2.89528e-05	3.36685e-05	0.785399	4.99999
2.88905e-05	3.34994e-05	0.785399	5			1.97009e-07	8.68521e-06	0.785398	4.99999			2.88905e-05	3.34994e-05	0.785399	4.99999
2.88208e-05	3.33238e-05	0.785399	5			1.78396e-07	8.44475e-06	0.785398	4.99999			2.88208e-05	3.33238e-05	0.785399	4.99999
2.87437e-05	3.31417e-05	0.785399	5			1.59068e-07	8.20517e-06	0.785398	4.99999			2.87437e-05	3.31417e-05	0.785399	4.99999
2.86594e-05	3.29532e-05	0.785399	5			1.3904e-07	7.96656e-06	0.785398	4.99999			2.86594e-05	3.29532e-05	0.785399	4.99999
2.8568e-05	3.27585e-05	0.785399	5			1.18329e-07	7.72901e-06	0.785398	4.99999			2.8568e-05	3.27585e-05	0.785399	4.99999
2.84695e-05	3.25577e-05	0.785399	5			9.69498e-08	7.4926e-06	0.785398	4.99999			2.84695e-05	3.25577e-05	0.785399	4.99999
2.83641e-05	3.23509e-05	0.785399	5			7.492e-08	7.25742e-06	0.785398	4.99999			2.83641e-05	3.23509e-05	0.785399	4.99999
2.8252e-05	3.21382e-05	0.785399	5			5.2256e-08	7.02357e-06	0.785398	4.99999			2.8252e-05	3.21382e-05	0.785399	4.99999
2.81331e-05	3.19199e-05	0.785399	5			2.89747e-08	6.79111e-06	0.785398	4.99999			2.81331e-05	3.19199e-05	0.785399	4.99999
2.80077e-05	3.16959e-05	0.785399	5			5.09327e-09	6.56014e-06	0.785398	4.99999			2.80077e-05	3.16959e-05	0.785399	4.99999
2.78758e-05	3.14665e-05	0.785399	5			-1.93711e-08	6.33073e-06	0.785398	4.99999			2.78758e-05	3.14665e-05	0.7854	4.99999
2.77375e-05	3.12317e-05	0.785399	5			-4.44009e-08	6.10296e-06	0.785398	4.99999			2.77375e-05	3.12317e-05	0.7854	4.99999
[truncated: 1,002 more rows]

## Sheet: Sheet2
theta1						theta2						theta3
0	0	0	0			0	0	0	0			0	0	0	0
0	0	0	0.000489779			0	0	0	0.000489779			0	0	0	0.000489779
0	0	0	0.00195712			0	0	0	0.00195712			0	0	0	0.00195712
0	0	0	0.00439714			0	0	0	0.00439714			0	0	0	0.00439714
0	0	0	0.00780362			0	0	0	0.00780362			0	0	0	0.00780362
0	0	0	0.01217			0	0	0	0.01217			0	0	0	0.01217
0	0	0	0.0174899			0	0	0	0.0174899			0	0	0	0.0174899
0	0	0	0.0237574			0	0	0	0.0237574			0	0	0	0.0237574
0	0	0	0.0309673			0	0	0	0.0309673			0	0	0	0.0309673
0	0	0	0.0391149			0	0	0	0.0391149			0	0	0	0.0391149
0	0	0	0.0481963			0	0	0	0.0481963			0	0	0	0.0481963
0	0	0	0.0582082			0	0	0	0.0582082			0	0	0	0.0582082
0	0	0	0.0691475			0	0	0	0.0691475			0	0	0	0.0691475
0	0	0	0.081012			0	0	0	0.081012			0	0	0	0.081012
0	0	0	0.0937996			0	0	0	0.0937996			0	0	0	0.0937996
0	0	0	0.107509			0	0	0	0.107509			0	0	0	0.107509
0	0	0	0.122138			0	0	0	0.122138			0	0	0	0.122138
0	0	0	0.137686			0	0	0	0.137686			0	0	0	0.137686
0	0	0	0.154152			0	0	0	0.154152			0	0	0	0.154152
0	0	0	0.171535			0	0	0	0.171535			0	0	0	0.171535
0	0	0	0.189835			0	0	0	0.189835			0	0	0	0.189835
0	0	0	0.20905			0	0	0	0.20905			0	0	0	0.20905
0	0	0	0.229182			0	0	0	0.229182			0	0	0	0.229182
0	0	0	0.250228			0	0	0	0.250228			0	0	0	0.250228
0	0	0	0.27219			0	0	0	0.27219			0	0	0	0.27219
0	0	0	0.295066			0	0	0	0.295066			0	0	0	0.295066
0	0	0	0.318857			0	0	0	0.318857			0	0	0	0.318857
0	0	0	0.343562			0	0	0	0.343562			0	0	0	0.343562
0	0	0	0.369181			0	0	0	0.369181			0	0	0	0.369181
0	0	0	0.395714			0	0	0	0.395714			0	0	0	0.395714
0	0	0	0.423161			0	0	0	0.423161			0	0	0	0.423161
0	0	0	0.451522			0	0	0	0.451522			0	0	0	0.451522
0	0	0	0.480797			0	0	0	0.480797			0	0	0	0.480797
0	0	0	0.510986			0	0	0	0.510986			0	0	0	0.510986
0	0	0	0.542089			0	0	0	0.542089			0	0	0	0.542089
0	0	0	0.574105			0	0	0	0.574105			0	0	0	0.574105
0	0	0	0.607035			0	0	0	0.607035			0	0	0	0.607035
0	0	0	0.640879			0	0	0	0.640879			0	0	0	0.640879
0	0	0	0.675637			0	0	0	0.675637			0	0	0	0.675637
0	0	0	0.711308			0	0	0	0.711308			0	0	0	0.711308
0	0	0	0.747893			0	0	0	0.747893			0	0	0	0.747893
0	0	0	0.785391			0	0	0	0.785391			0	0	0	0.785391
0	0	0	0.823803			0	0	0	0.823803			0	0	0	0.823803
0	0	0	0.863129			0	0	0	0.863129			0	0	0	0.863129
0	0	0	0.903368			0	0	0	0.903368			0	0	0	0.903368
0	0	0	0.944521			0	0	0	0.944521			0	0	0	0.944513
0	0	0	0.986588			0	0	0	0.986588			0	0	0	0.98652
0	0	0	1.02957			0	0	0	1.02957			0	0	0	1.0293
0	0	0	1.07346			0	0	0	1.07346			1.57297e-07	-1.52512e-14	1.93915e-07	1.07269
0	0	0	1.11827			0	0	0	1.11827			2.08517e-06	-4.52089e-06	7.42115e-06	1.11643
0	0	0	1.16399			0	0	0	1.16399			7.76189e-06	-1.83519e-05	2.92516e-05	1.16027
0	0	0	1.21062			0	0	0	1.21062			1.98437e-05	-4.83607e-05	7.6332e-05	1.20393
0	0	0	1.25817			0	0	0	1.25817			4.16436e-05	-0.000103178	0.000162056	1.24716
0	0	0	1.30663			0	0	0	1.30663			7.70998e-05	-0.00019317	0.000302545	1.28976
0	0	0	1.35601			0	0	0	1.35601			0.000130652	-0.00033014	0.00051624	1.33152
0	0	0	1.40629			0	0	0	1.4063			0.000207052	-0.000526849	0.000823239	1.37229
0	0	0	1.45745			0	0	0	1.45748			0.000311141	-0.000796421	0.00124448	1.41193
0	0	0	1.50945			0	0	0	1.50948			0.000441112	-0.00113736	0.00177654	1.45031
0	0	0	1.56221			0	0	0	1.56214			0.000595084	-0.00154391	0.00241073	1.48734
0	0	0	1.61565			0	0	0	1.61523			0.00077003	-0.00200819	0.0031346	1.52293
1.65864e-06	-3.07422e-06	5.1315e-06	1.66961			0	0	0	1.66847			0.000963023	-0.0025224	0.00393596	1.55702
6.89608e-06	-1.47926e-05	2.38213e-05	1.72396			0	0	0	1.72158			0.00117136	-0.0030793	0.00480347	1.58964
1.87029e-05	-4.29229e-05	6.80904e-05	1.77847			0	0	0	1.77432			0.00139265	-0.00367237	0.00572692	1.62095
4.11026e-05	-9.80123e-05	0.000154269	1.83293			0	0	0	1.82647			0.00162477	-0.00429586	0.00669736	1.65122
7.91277e-05	-0.000193404	0.000303057	1.8871			0	0	0	1.87783			0.00186592	-0.00494479	0.00770707	1.68077
0.000136069	-0.000340266	0.000531056	1.94074			0	0	0	1.92822			0.00211454	-0.00561755	0.00875263	1.70994
0.000210753	-0.000537991	0.000836495	1.99365			0	0	0	1.97751			0.0023761	-0.0063282	0.00986103	1.73903
0.000301686	-0.000782612	0.00121323	2.04565			0	0	0	2.02556			0.00265441	-0.00708843	0.0110541	1.76829
0.00040707	-0.00106915	0.00165362	2.09659			0	0	0	2.07229			0.00295299	-0.00790733	0.0123504	1.79791
0.000525049	-0.00139238	0.00214967	2.14634			0	0	0	2.1176			0.00327402	-0.00879037	0.0137623	1.82799
0.000653844	-0.00174722	0.00269363	2.19479			0	0	0	2.16142			0.00361849	-0.00973988	0.0152967	1.85862
0.000791829	-0.00212901	0.00327841	2.24185			1.6748e-06	-3.87656e-06	6.13241e-06	2.20369			0.00398648	-0.0107557	0.0169558	1.8898
0.000937556	-0.00253359	0.00389765	2.28746			6.93896e-06	-1.68731e-05	2.64167e-05	2.24436			0.00437736	-0.0118358	0.0187387	1.92151
0.00108977	-0.00295729	0.0045458	2.33159			1.87218e-05	-4.66282e-05	7.26652e-05	2.28339			0.00479006	-0.0129769	0.0206419	1.95368
0.00124738	-0.00339698	0.00521808	2.37428			4.09022e-05	-0.000103348	0.000160671	2.32075			0.00522323	-0.0141753	0.0226607	1.98619
0.00140947	-0.00384997	0.00591042	2.4156			7.82916e-05	-0.000199825	0.00031027	2.35644			0.00567547	-0.0154268	0.0247898	2.01886
0.00157527	-0.00431399	0.00661938	2.45563			0.000135376	-0.000350297	0.000542925	2.39058			0.00614538	-0.0167276	0.0270238	2.05149
0.00174413	-0.00478715	0.00734207	2.49451			0.000212362	-0.000554562	0.000858587	2.42344			0.00663169	-0.0180742	0.0293582	2.08383
0.00191552	-0.00526785	0.00807608	2.53236			0.000307669	-0.000810387	0.00125316	2.45535			0.00713328	-0.0194634	0.0317891	2.11565
0.00208897	-0.00575476	0.00881941	2.56931			0.000419327	-0.00111249	0.00171846	2.48668			0.00764921	-0.0208928	0.0343138	2.14675
0.00226412	-0.0062468	0.00957039	2.60549			0.000545269	-0.0014552	0.00224578	2.51776			0.00817869	-0.0223602	0.0369306	2.17694
0.00244067	-0.00674306	0.0103276	2.64102			0.0006835	-0.001833	0.00282659	2.54887			0.00872109	-0.023864	0.0396387	2.20607
0.00261853	-0.00724867	0.0110979	2.676			0.000832184	-0.00224074	0.00345303	2.58022			0.00927586	-0.0254028	0.0424382	2.23404
0.00280491	-0.00778205	0.0119143	2.71052			0.000989685	-0.00267382	0.00411805	2.61197			0.00984256	-0.0269754	0.0453301	2.26082
0.00300513	-0.00835908	0.0128051	2.74465			0.00115457	-0.00312821	0.00481546	2.64417			0.0104207	-0.0285807	0.0483157	2.2865
0.00322375	-0.00899055	0.0137911	2.77844			0.00132562	-0.0036004	0.00553991	2.67687			0.01101	-0.0302176	0.0513967	2.31124
0.00346357	-0.00968272	0.0148854	2.81195			0.00150177	-0.00408743	0.00628687	2.71002			0.0116099	-0.0318849	0.0545747	2.33526
0.00372596	-0.0104382	0.0160948	2.84518			0.00168216	-0.00458676	0.00705246	2.74354			0.0122199	-0.0335811	0.0578514	2.35882
0.0040112	-0.0112567	0.0174209	2.87816			0.00186604	-0.00509629	0.00783348	2.77731			0.0128395	-0.0353046	0.0612282	2.38217
0.00431881	-0.0121363	0.0188622	2.91088			0.00205279	-0.00561424	0.00862719	2.81112			0.013468	-0.0370533	0.0647059	2.40553
0.00464787	-0.0130738	0.0204151	2.94334			0.00224191	-0.00613913	0.00943137	2.84474			0.0141048	-0.0388249	0.0682848	2.42906
0.00499728	-0.0140661	0.0220752	2.97552			0.00243297	-0.00666974	0.0102441	2.87792			0.0147492	-0.0406169	0.0719644	2.45291
0.00536594	-0.0151097	0.0238384	3.0074			0.00262562	-0.00720505	0.011064	2.91045			0.0154003	-0.0424263	0.0757439	2.47716
0.00575291	-0.016202	0.0257015	3.03895			0.00281957	-0.00774424	0.0118895	2.94214			0.0160574	-0.0442501	0.0796212	2.50184
0.00615745	-0.017341	0.0276623	3.07015			0.00301459	-0.00828659	0.0127199	2.97282			0.0167196	-0.0460851	0.083594	2.52696
0.00657906	-0.0185252	0.0297204	3.10096			0.00321049	-0.00883155	0.013554	3.00237			0.0173862	-0.0479278	0.0876591	2.55247
0.00701743	-0.0197539	0.0318763	3.13135			0.0034071	-0.00937865	0.0143913	3.03066			0.0180564	-0.049775	0.0918129	2.57829
0.00747247	-0.0210268	0.0341324	3.1613			0.00360429	-0.0099275	0.0152312	3.05761			0.0187293	-0.0516234	0.0960513	2.60432
0.00794416	-0.022344	0.0364917	3.19079			0.00380196	-0.0104778	0.0160731	3.08328			0.0194045	-0.0534698	0.10037	2.63039
0.00843257	-0.0237057	0.038958	3.21978			0.00400002	-0.0110293	0.0169168	3.10779			0.0200811	-0.0553112	0.104764	2.65633
0.00893775	-0.0251122	0.0415355	3.24827			0.00419839	-0.0115817	0.0177618	3.13136			0.0207587	-0.0571447	0.10923	2.68194
0.00945968	-0.0265633	0.0442286	3.27625			0.00439702	-0.0121349	0.0186079	3.15426			0.0214368	-0.0589679	0.113763	2.70701
0.00999823	-0.0280588	0.047041	3.30371			0.00459586	-0.0126887	0.0194548	3.17675			0.0221148	-0.0607783	0.118358	2.73136
0.0105531	-0.0295977	0.049976	3.33066			0.00479487	-0.0132431	0.0203025	3.1991			0.0227923	-0.0625738	0.123012	2.75484
0.0111239	-0.0311784	0.0530358	3.35709			0.00499402	-0.0137979	0.0211507	3.22152			0.0234691	-0.0643522	0.12772	2.77738
0.0117099	-0.0327989	0.0562215	3.38301			0.00519328	-0.0143531	0.0219994	3.24416			0.0241447	-0.0661117	0.13248	2.79896
0.0123103	-0.0344565	0.0595328	3.40845			0.00539264	-0.0149085	0.0228484	3.26715			0.0248188	-0.0678506	0.137288	2.81964
0.0129241	-0.0361477	0.0629681	3.43341			0.00559569	-0.0154822	0.0237295	3.29054			0.0254913	-0.0695671	0.142141	2.83956
0.0135502	-0.0378687	0.0665243	3.45792			0.00580946	-0.016087	0.0246718	3.31434			0.0261617	-0.0712594	0.147037	2.85889
0.0141876	-0.0396155	0.0701973	3.48199			0.00603901	-0.0167347	0.0257002	3.33853			0.0268299	-0.072926	0.151974	2.87782
0.0148348	-0.0413838	0.0739819	3.50563			0.00628784	-0.017433	0.0268322	3.36304			0.0274956	-0.0745651	0.15695	2.89655
0.0154909	-0.0431691	0.0778719	3.52888			0.0065581	-0.018186	0.0280789	3.38774			0.0281587	-0.076175	0.161963	2.91527
0.0161544	-0.0449673	0.0818608	3.55175			0.00685082	-0.0189955	0.029446	3.4125			0.0288188	-0.077754	0.167011	2.93412
0.0168244	-0.0467743	0.0859418	3.57425			0.00716616	-0.0198609	0.0309352	3.4371			0.0294757	-0.0793001	0.172092	2.95322
0.0174998	-0.0485865	0.0901082	3.59641			0.00750368	-0.0207804	0.0325451	3.46133			0.0301294	-0.0808117	0.177206	2.97265
0.0181796	-0.0504004	0.0943534	3.61823			0.0078625	-0.0217512	0.0342724	3.48497			0.0307794	-0.0822868	0.18235	2.99243
0.018863	-0.0522131	0.0986715	3.63972			0.00824155	-0.0227701	0.0361127	3.50783			0.0314258	-0.0837237	0.187524	3.01258
0.0195494	-0.0540217	0.103057	3.66091			0.00863966	-0.0238339	0.0380614	3.52974			0.0320683	-0.0851205	0.192726	3.03306
0.0202379	-0.055824	0.107505	3.6818			0.0090557	-0.0249393	0.0401138	3.55057			0.0327067	-0.0864756	0.197954	3.05382
0.0209281	-0.0576176	0.112011	3.70239			0.00948858	-0.0260836	0.0422657	3.5703			0.033341	-0.0877873	0.203207	3.07474
0.0216193	-0.0594005	0.116572	3.72269			0.00993739	-0.027264	0.0445139	3.58897			0.033971	-0.0890539	0.208483	3.09572
0.0223112	-0.0611707	0.121185	3.74271			0.0104013	-0.0284786	0.0468558	3.60671			0.0345967	-0.0902742	0.213781	3.11661
0.0230033	-0.0629262	0.125847	3.76244			0.0108796	-0.0297253	0.0492896	3.62371			0.0352179	-0.0914468	0.219099	3.13724
0.0236952	-0.0646649	0.130558	3.78189			0.0113718	-0.0310026	0.0518143	3.64019			0.0358347	-0.0925706	0.224435	3.15745
0.0243864	-0.0663848	0.135315	3.80106			0.0118774	-0.0323092	0.0544298	3.65638			0.0364471	-0.0936446	0.229788	3.1771
0.0250766	-0.0680837	0.140117	3.81996			0.012396	-0.0336438	0.0571365	3.6725			0.037055	-0.0946679	0.235155	3.19608
0.0257655	-0.0697592	0.144964	3.83857			0.0129272	-0.0350051	0.0599349	3.68872			0.0376585	-0.09564	0.240536	3.21431
0.0264526	-0.0714092	0.149854	3.85691			0.0134707	-0.0363921	0.0628263	3.70519			0.0382575	-0.0965603	0.245928	3.23178
0.0271376	-0.0730311	0.154787	3.87496			0.014026	-0.0378033	0.0658117	3.72199			0.0388522	-0.0974284	0.251331	3.24852
0.0278201	-0.0746225	0.159761	3.89274			0.0145929	-0.0392376	0.0688922	3.73917			0.0394426	-0.0982441	0.256741	3.26463
0.0284997	-0.076181	0.164776	3.91024			0.0151709	-0.0406933	0.072069	3.75676			0.0400287	-0.0990071	0.262159	3.28024
0.0291763	-0.0777042	0.169829	3.92747			0.0157595	-0.0421686	0.0753428	3.77471			0.0406106	-0.0997175	0.267581	3.29549
0.0298495	-0.07919	0.174921	3.94442			0.0163582	-0.0436616	0.0787139	3.79297			0.0411882	-0.100375	0.273008	3.31055
0.0305192	-0.0806363	0.180048	3.9611			0.0169664	-0.0451702	0.0821822	3.81145			0.0417617	-0.10098	0.278436	3.32556
0.031185	-0.0820411	0.185209	3.97751			0.0175835	-0.046692	0.0857472	3.82999			0.0423311	-0.101533	0.283866	3.34065
0.0318469	-0.083403	0.190403	3.99366			0.0182088	-0.0482245	0.0894079	3.84845			0.0428964	-0.102032	0.289296	3.35591
0.0325048	-0.0847204	0.195626	4.00954			0.0188417	-0.049765	0.0931626	3.86664			0.0434576	-0.102479	0.294725	3.37142
0.0331587	-0.0859924	0.200877	4.02516			0.0194814	-0.0513108	0.0970092	3.88436			0.0440146	-0.102874	0.30015	3.38722
0.0338084	-0.0872181	0.206154	4.04053			0.0201273	-0.052859	0.100945	3.90144			0.0445675	-0.103216	0.305572	3.40332
0.034454	-0.0883969	0.211454	4.05565			0.0207786	-0.054407	0.104967	3.91775			0.0451163	-0.103505	0.31099	3.4197
0.0350956	-0.0895284	0.216774	4.07053			0.0214346	-0.0559518	0.109073	3.93318			0.0456609	-0.103742	0.316401	3.4363
0.0357331	-0.0906124	0.222114	4.08516			0.0220947	-0.0574908	0.113257	3.9477			0.0462012	-0.103926	0.321805	3.45307
0.0363667	-0.0916489	0.22747	4.09956			0.0227582	-0.0590214	0.117517	3.96136			0.0467373	-0.104057	0.3272	3.46989
0.0369963	-0.0926378	0.232841	4.11374			0.0234246	-0.0605412	0.121849	3.97426			0.047269	-0.104136	0.332587	3.48667
0.037622	-0.0935793	0.238225	4.12768			0.0240933	-0.0620479	0.126249	3.98656			0.0477963	-0.104162	0.337963	3.50327
0.0382438	-0.0944733	0.243619	4.14141			0.0247637	-0.0635395	0.130712	3.99843			0.048319	-0.104134	0.343327	3.51956
0.0388618	-0.0953198	0.249024	4.15492			0.0254355	-0.0650139	0.135235	4.01007			0.0488372	-0.104054	0.348679	3.53544
0.0394759	-0.0961187	0.254436	4.16822			0.0261082	-0.0664695	0.139814	4.02166			0.0493506	-0.103922	0.354018	3.5508
0.0400861	-0.0968699	0.259855	4.18131			0.0267813	-0.0679046	0.144446	4.03335			0.0498592	-0.103736	0.359342	3.56559
0.0406924	-0.0975729	0.265279	4.1942			0.0274546	-0.0693178	0.149127	4.04525			0.0503629	-0.103498	0.364651	3.57978
0.0412947	-0.0982275	0.270708	4.20689			0.0281276	-0.0707076	0.153854	4.05746			0.0508616	-0.103208	0.369943	3.59338
0.041893	-0.0988329	0.276139	4.21938			0.0288002	-0.0720728	0.158625	4.07002			0.051355	-0.102866	0.375218	3.60647
0.0424872	-0.0993888	0.281571	4.23168			0.0294719	-0.0734121	0.163437	4.08294			0.0518432	-0.102472	0.380474	3.61911
0.0430773	-0.0998942	0.287004	4.24379			0.0301426	-0.0747244	0.168288	4.09621			0.0523259	-0.102026	0.385712	3.63144
0.043663	-0.100349	0.292435	4.25571			0.0308119	-0.0760084	0.173175	4.10978			0.0528031	-0.101531	0.390929	3.64357
0.0442444	-0.100751	0.297865	4.26745			0.0314797	-0.0772631	0.178095	4.12355			0.0532745	-0.100984	0.396126	3.65562
0.0448214	-0.101101	0.303291	4.27901			0.0321456	-0.0784872	0.183049	4.13743			0.0537401	-0.100389	0.401301	3.66768
0.0453937	-0.101398	0.308713	4.29039			0.0328095	-0.0796797	0.188032	4.15128			0.0541996	-0.0997441	0.406455	3.67986
0.0459614	-0.101641	0.314128	4.30159			0.0334712	-0.0808392	0.193045	4.16494			0.054653	-0.0990512	0.411585	3.69222
0.0465243	-0.101831	0.319537	4.31262			0.0341304	-0.0819647	0.198085	4.17827			0.0551	-0.0983107	0.416692	3.7048
0.0470823	-0.101965	0.324937	4.32348			0.0347869	-0.083055	0.203151	4.19111			0.0555405	-0.0975236	0.421775	3.71761
0.0476353	-0.102045	0.330328	4.33417			0.0354406	-0.0841089	0.208242	4.20334			0.0559743	-0.0966905	0.426833	3.73065
0.0481832	-0.102071	0.335708	4.34468			0.0360912	-0.0851251	0.213356	4.21489			0.0564012	-0.0958122	0.431866	3.74388
0.0487259	-0.102041	0.341077	4.35504			0.0367385	-0.0861026	0.218491	4.22571			0.0568211	-0.0948896	0.436874	3.75726
0.0492634	-0.101958	0.346434	4.36523			0.0373824	-0.0870402	0.223646	4.23583			0.0572338	-0.0939235	0.441855	3.77071
0.0497955	-0.101821	0.351776	4.37526			0.0380226	-0.0879368	0.22882	4.24532			0.057639	-0.0929146	0.446809	3.78415
0.0503223	-0.10163	0.357105	4.38513			0.0386591	-0.0887915	0.234012	4.2543			0.0580366	-0.091864	0.451735	3.79748
0.0508434	-0.101387	0.362418	4.39485			0.0392916	-0.0896031	0.23922	4.2629			0.0584263	-0.0907722	0.456634	3.8106
0.051359	-0.101092	0.367714	4.40441			0.03992	-0.0903709	0.244442	4.27127			0.058808	-0.0896403	0.461505	3.82343
0.051869	-0.100746	0.372995	4.41382			0.0405442	-0.0910941	0.249677	4.27957			0.0591814	-0.088469	0.466346	3.83587
0.0523731	-0.10035	0.378257	4.42308			0.0411641	-0.0917718	0.254925	4.28794			0.0595462	-0.0872592	0.471159	3.84788
0.0528714	-0.0999044	0.383502	4.43219			0.0417795	-0.0924035	0.260183	4.29647			0.0599024	-0.0860116	0.475941	3.85942
0.0533637	-0.0994102	0.388727	4.44116			0.0423903	-0.0929887	0.265449	4.30524			0.0602495	-0.0847271	0.480693	3.8705
0.0538499	-0.0988682	0.393933	4.44999			0.0429965	-0.0935269	0.270723	4.31432			0.0605875	-0.0834065	0.485415	3.88115
0.0543299	-0.0982793	0.399119	4.45868			0.0435979	-0.0940178	0.276004	4.32372			0.0609159	-0.0820507	0.490105	3.89144
0.0548036	-0.0976441	0.404285	4.46723			0.0441945	-0.0944612	0.281289	4.33342			0.0612347	-0.0806606	0.494763	3.90143
0.0552707	-0.0969634	0.409429	4.47564			0.0447861	-0.0948568	0.286578	4.34341			0.0615434	-0.0792369	0.499389	3.91122
0.0557312	-0.0962377	0.41455	4.48392			0.0453728	-0.0952046	0.291869	4.3536			0.061842	-0.0777806	0.503982	3.9209
0.0561849	-0.0954678	0.41965	4.49207			0.0459544	-0.0955046	0.297161	4.36393			0.06213	-0.0762926	0.508543	3.93056
0.0566316	-0.0946542	0.424725	4.5001			0.0465309	-0.0957569	0.302453	4.37428			0.0624073	-0.0747736	0.51307	3.94028
0.057071	-0.0937974	0.429777	4.50799			0.0471022	-0.0959616	0.307744	4.38454			0.0626736	-0.0732248	0.517563	3.95011
0.057503	-0.092898	0.434804	4.51576			0.0476682	-0.0961188	0.313032	4.39458			0.0629287	-0.0716469	0.522022	3.9601
0.0579274	-0.0919564	0.439805	4.52341			0.0482289	-0.0962287	0.318316	4.40427			0.0631723	-0.0700409	0.526446	3.97026
0.0583439	-0.0909732	0.44478	4.53094			0.0487842	-0.0962916	0.323595	4.41351			0.0634041	-0.0684077	0.530836	3.98061
0.0587522	-0.089949	0.449728	4.53834			0.049334	-0.0963078	0.328869	4.42224			0.0636239	-0.0667484	0.53519	3.99112
0.0591522	-0.0888843	0.454649	4.54564			0.0498782	-0.0962775	0.334136	4.43039			0.0638315	-0.0650638	0.539509	4.00176
0.0595435	-0.0877797	0.45954	4.55281			0.0504167	-0.096201	0.339395	4.43798			0.0640267	-0.063355	0.543792	4.01249
0.059926	-0.086636	0.464403	4.55988			0.0509495	-0.0960786	0.344645	4.44505			0.0642091	-0.0616229	0.54804	4.02322
0.0602994	-0.0854537	0.469236	4.56683			0.0514765	-0.0959106	0.349886	4.45166			0.0643787	-0.0598686	0.552251	4.0339
0.0606633	-0.0842337	0.474039	4.57367			0.0519974	-0.0956973	0.355116	4.45794			0.0645351	-0.0580929	0.556426	4.04445
0.0610177	-0.0829767	0.478811	4.58041			0.0525123	-0.095439	0.360335	4.46399			0.0646782	-0.0562968	0.560564	4.05479
0.0613622	-0.0816836	0.483552	4.58704			0.053021	-0.0951361	0.365541	4.46993			0.0648077	-0.0544815	0.564666	4.06486
0.0616966	-0.0803553	0.488262	4.59356			0.0535234	-0.0947889	0.370734	4.47588			0.0649234	-0.0526477	0.568731	4.07461
0.0620207	-0.0789926	0.492939	4.59998			0.0540193	-0.0943976	0.375913	4.48195			0.0650252	-0.0507966	0.572759	4.08401
0.0623342	-0.0775966	0.497584	4.6063			0.0545086	-0.0939626	0.381077	4.48819			0.0651129	-0.0489291	0.57675	4.09305
0.062637	-0.0761683	0.502196	4.61253			0.0549911	-0.0934843	0.386225	4.49468			0.0651862	-0.0470461	0.580703	4.10174
0.0629288	-0.0747085	0.506775	4.61865			0.0554668	-0.092963	0.391356	4.50143			0.065245	-0.0451487	0.584619	4.11011
0.0632094	-0.0732184	0.511321	4.62467			0.0559354	-0.0923992	0.39647	4.50845			0.0652892	-0.0432378	0.588498	4.11823
0.0634786	-0.0716989	0.515834	4.6306			0.0563968	-0.0917931	0.401566	4.51572			0.0653184	-0.0413143	0.592339	4.12616
0.0637363	-0.0701511	0.520313	4.63644			0.0568507	-0.0911452	0.406643	4.52321			0.0653327	-0.0393791	0.596142	4.13396
0.0639823	-0.068576	0.524758	4.64219			0.0572972	-0.0904559	0.4117	4.53084			0.0653317	-0.0374334	0.599907	4.14171
0.0642162	-0.0669745	0.529169	4.64784			0.0577358	-0.0897258	0.416736	4.53854			0.0653154	-0.0354779	0.603635	4.14947
0.064438	-0.0653476	0.533546	4.6534			0.0581666	-0.0889553	0.421751	4.54622			0.0652837	-0.0335136	0.607324	4.15729
0.0646475	-0.0636963	0.537889	4.65888			0.0585892	-0.0881449	0.426744	4.55377			0.0652363	-0.0315414	0.610975	4.16522
0.0648444	-0.0620216	0.542196	4.66427			0.0590036	-0.0872951	0.431715	4.5611			0.0651731	-0.0295623	0.614588	4.17328
0.0650285	-0.0603245	0.546469	4.66957			0.0594095	-0.0864066	0.436662	4.56812			0.065094	-0.0275772	0.618162	4.18147
0.0651996	-0.0586057	0.550707	4.6748			0.0598068	-0.08548	0.441585	4.57475			0.064999	-0.0255869	0.621698	4.1898
0.0653576	-0.0568664	0.554909	4.67993			0.0601951	-0.0845158	0.446483	4.58095			0.0648878	-0.0235924	0.625196	4.19824
0.0655022	-0.0551073	0.559076	4.68499			0.0605745	-0.0835148	0.451357	4.58671			0.0647604	-0.0215947	0.628655	4.20676
0.0656332	-0.0533294	0.563207	4.68997			0.0609446	-0.0824776	0.456204	4.59203			0.0646167	-0.0195944	0.632075	4.21532
0.0657503	-0.0515337	0.567301	4.69487			0.0613053	-0.0814049	0.461026	4.59697			0.0644565	-0.0175926	0.635457	4.22385
0.0658534	-0.0497209	0.571359	4.69969			0.0616564	-0.0802974	0.46582	4.6016			0.06428	-0.0155902	0.6388	4.23231
0.0659423	-0.0478921	0.57538	4.70443			0.0619977	-0.0791559	0.470587	4.606			0.0640868	-0.0135879	0.642105	4.24064
0.0660167	-0.046048	0.579364	4.7091			0.0623291	-0.0779812	0.475326	4.61027			0.0638772	-0.0115867	0.645371	4.24878
0.0660764	-0.0441897	0.583311	4.7137			0.0626502	-0.076774	0.480037	4.61451			0.0636509	-0.0095873	0.648598	4.25669
0.0661213	-0.0423181	0.58722	4.71822			0.062961	-0.075535	0.484719	4.61879			0.0634079	-0.00759066	0.651787	4.26434
0.0661512	-0.040434	0.591091	4.72267			0.0632612	-0.0742652	0.489372	4.6232			0.0631483	-0.00559756	0.654937	4.27171
0.0661658	-0.0385383	0.594925	4.72706			0.0635507	-0.0729652	0.493996	4.62778			0.062872	-0.00360881	0.658049	4.27881
0.0661651	-0.0366321	0.59872	4.73137			0.0638292	-0.0716359	0.498589	4.63258			0.0625791	-0.00162522	0.661122	4.28565
0.0661488	-0.0347162	0.602477	4.73562			0.0640967	-0.0702782	0.503152	4.6376			0.0622695	0.000352412	0.664157	4.29227
0.0661169	-0.0327915	0.606196	4.73979			0.0643528	-0.0688928	0.507684	4.64284			0.0619433	0.00232332	0.667154	4.2987
0.0660692	-0.0308589	0.609877	4.74391			0.0645974	-0.0674805	0.512185	4.64828			0.0616005	0.00428673	0.670112	4.30501
0.0660056	-0.0289194	0.613519	4.74795			0.0648304	-0.0660422	0.516655	4.65387			0.0612412	0.00624189	0.673033	4.31125
0.0659261	-0.0269739	0.617122	4.75194			0.0650515	-0.0645787	0.521093	4.65956			0.0608654	0.00818805	0.675915	4.31746
0.0658304	-0.0250231	0.620687	4.75586			0.0652606	-0.0630908	0.525499	4.66528			0.0604731	0.0101245	0.678759	4.3237
0.0657186	-0.0230682	0.624214	4.75972			0.0654575	-0.0615794	0.529872	4.67095			0.0600646	0.0120505	0.681566	4.32999
0.0655906	-0.0211098	0.627702	4.76352			0.0656419	-0.0600453	0.534212	4.67649			0.0596398	0.0139653	0.684335	4.33638
0.0654462	-0.0191489	0.631151	4.76726			0.0658138	-0.0584894	0.53852	4.68183			0.0591989	0.0158683	0.687067	4.34286
0.0652856	-0.0171863	0.634563	4.77094			0.0659729	-0.0569123	0.542794	4.68689			0.0587419	0.0177588	0.689761	4.34945
0.0651086	-0.0152229	0.637935	4.77456			0.066119	-0.0553151	0.547034	4.69165			0.058269	0.019636	0.692417	4.35613
0.0649153	-0.0132595	0.64127	4.77812			0.066252	-0.0536985	0.55124	4.69605			0.0577804	0.0214994	0.695037	4.36289
0.0647055	-0.0112969	0.644566	4.78163			0.0663718	-0.0520633	0.555412	4.70012			0.057276	0.0233484	0.69762	4.36969
0.0644793	-0.00933605	0.647824	4.78509			0.066478	-0.0504105	0.55955	4.70386			0.0567562	0.0251822	0.700166	4.37649
0.0642366	-0.00737762	0.651044	4.78849			0.0665707	-0.0487407	0.563652	4.70732			0.056221	0.0270002	0.702675	4.38326
0.0639775	-0.00542245	0.654225	4.79183			0.0666495	-0.0470549	0.56772	4.71056			0.0556707	0.0288019	0.705148	4.38995
0.063702	-0.00347133	0.657369	4.79513			0.0667144	-0.0453539	0.571752	4.71366			0.0551053	0.0305867	0.707584	4.39652
0.06341	-0.00152503	0.660474	4.79837			0.0667652	-0.0436385	0.575749	4.71668			0.0545251	0.0323539	0.709985	4.40293
0.0631015	0.00041566	0.663541	4.80156			0.0668017	-0.0419096	0.57971	4.71971			0.0539303	0.0341031	0.712349	4.40915
0.0627767	0.00234999	0.66657	4.8047			0.0668239	-0.040168	0.583635	4.7228			0.0533211	0.0358337	0.714678	4.41516
0.0624355	0.0042772	0.669561	4.8078			0.0668315	-0.0384145	0.587523	4.72601			0.0526976	0.0375451	0.716971	4.42096
0.0620779	0.00619655	0.672513	4.81084			0.0668244	-0.0366499	0.591376	4.72938			0.0520601	0.0392368	0.719229	4.42656
0.061704	0.00810731	0.675428	4.81383			0.0668025	-0.0348751	0.595192	4.73292			0.0514089	0.0409084	0.721452	4.43196
0.0613138	0.0100087	0.678305	4.81678			0.0667657	-0.033091	0.598971	4.73665			0.0507442	0.0425593	0.723639	4.43721
0.0609075	0.0119001	0.681144	4.81969			0.0667139	-0.0312983	0.602714	4.74056			0.0500662	0.044189	0.725793	4.44233
0.0604851	0.0137808	0.683946	4.82254			0.066647	-0.0294978	0.606419	4.74462			0.0493752	0.0457971	0.727911	4.44737
0.0600466	0.0156501	0.686709	4.82535			0.0665649	-0.0276904	0.610088	4.74879			0.0486714	0.0473832	0.729996	4.45236
0.0595922	0.0175072	0.689435	4.82812			0.0664674	-0.0258769	0.613719	4.75303			0.0479552	0.0489469	0.732046	4.45734
0.0591221	0.0193516	0.692124	4.83085			0.0663545	-0.024058	0.617313	4.75726			0.0472267	0.0504876	0.734063	4.46235
0.0586362	0.0211826	0.694775	4.83353			0.0662262	-0.0222347	0.62087	4.76144			0.0464864	0.0520051	0.736047	4.46742
0.0581348	0.0229996	0.697389	4.83617			0.0660824	-0.0204076	0.624389	4.76549			0.0457344	0.0534989	0.737997	4.47255
0.057618	0.024802	0.699966	4.83877			0.065923	-0.0185776	0.627871	4.76937			0.0449712	0.0549686	0.739915	4.47775
0.057086	0.0265891	0.702506	4.84133			0.0657479	-0.0167455	0.631316	4.77303			0.0441969	0.056414	0.741799	4.48304
0.0565389	0.0283604	0.705009	4.84384			0.0655572	-0.014912	0.634722	4.77643			0.0434119	0.0578347	0.743652	4.48838
0.055977	0.0301153	0.707476	4.84632			0.0653507	-0.0130778	0.638092	4.77956			0.0426166	0.0592303	0.745472	4.49378
0.0554003	0.0318533	0.709907	4.84876			0.0651286	-0.0112438	0.641423	4.78244			0.0418113	0.0606005	0.747261	4.49919
0.0548092	0.0335738	0.712301	4.85116			0.0648907	-0.00941074	0.644717	4.78507			0.0409962	0.0619452	0.749018	4.5046
0.0542038	0.0352763	0.71466	4.85353			0.064637	-0.0075793	0.647974	4.7875			0.0401718	0.0632639	0.750743	4.50996
0.0535844	0.0369602	0.716983	4.85586			0.0643676	-0.00575024	0.651193	4.78978			0.0393383	0.0645565	0.752438	4.51525
0.0529511	0.0386252	0.71927	4.85815			0.0640824	-0.00392428	0.654374	4.79196			0.0384962	0.0658226	0.754103	4.52043
0.0523042	0.0402708	0.721522	4.8604			0.0637816	-0.00210215	0.657517	4.79411			0.0376458	0.0670621	0.755736	4.52548
0.051644	0.0418963	0.72374	4.86262			0.063465	-0.000284549	0.660623	4.79628			0.0367873	0.0682746	0.75734	4.53038
0.0509707	0.0435015	0.725922	4.86481			0.0631328	0.00152782	0.663692	4.79851			0.0359213	0.0694602	0.758915	4.53511
0.0502845	0.0450858	0.72807	4.86696			0.0627849	0.00333427	0.666723	4.80086			0.0350481	0.0706184	0.760459	4.53969
0.0495857	0.0466488	0.730184	4.86908			0.0624215	0.00513411	0.669716	4.80333			0.0341679	0.0717492	0.761975	4.54411
0.0488746	0.0481902	0.732264	4.87116			0.0620426	0.00692668	0.672673	4.80596			0.0332812	0.0728525	0.763462	4.5484
0.0481514	0.0497094	0.734309	4.87321			0.0616483	0.00871131	0.675591	4.80873			0.0323884	0.0739279	0.76492	4.55257
0.0474165	0.0512061	0.736322	4.87523			0.0612385	0.0104874	0.678473	4.81164			0.0314899	0.0749755	0.76635	4.55665
0.0466701	0.0526799	0.7383	4.87722			0.0608136	0.0122542	0.681317	4.81466			0.0305859	0.0759951	0.767753	4.56068
0.0459125	0.0541305	0.740246	4.87918			0.0603734	0.0140111	0.684125	4.81777			0.029677	0.0769865	0.769128	4.56468
0.045144	0.0555574	0.742159	4.8811			0.0599181	0.0157576	0.686895	4.82091			0.0287634	0.0779498	0.770475	4.56868
0.0443649	0.0569604	0.744039	4.883			0.0594479	0.017493	0.689628	4.82404			0.0278455	0.0788848	0.771796	4.5727
0.0435755	0.0583392	0.745887	4.88487			0.0589628	0.0192167	0.692325	4.82711			0.0269238	0.0797915	0.77309	4.57677
0.0427761	0.0596933	0.747703	4.8867			0.0584631	0.0209281	0.694985	4.83008			0.0259986	0.0806698	0.774358	4.58089
0.0419671	0.0610225	0.749487	4.88851			0.0579487	0.0226266	0.697608	4.83289			0.0250703	0.0815196	0.7756	4.58506
0.0411488	0.0623266	0.75124	4.89029			0.0574199	0.0243118	0.700195	4.83553			0.0241393	0.082341	0.776816	4.58929
0.0403215	0.0636053	0.752961	4.89205			0.0568768	0.0259829	0.702745	4.83797			0.0232059	0.083134	0.778007	4.59355
0.0394856	0.0648583	0.754652	4.89377			0.0563197	0.0276396	0.70526	4.8402			0.0222706	0.0838985	0.779174	4.59785
0.0386413	0.0660853	0.756311	4.89547			0.0557485	0.0292812	0.707738	4.84223			0.0213337	0.0846345	0.780315	4.60215
0.0377892	0.0672862	0.757941	4.89714			0.0551637	0.0309073	0.710181	4.84409			0.0203956	0.0853421	0.781432	4.60644
0.0369294	0.0684608	0.75954	4.89879			0.0545652	0.0325173	0.712587	4.8458			0.0194567	0.0860214	0.782525	4.61068
0.0360623	0.0696089	0.761109	4.90041			0.0539534	0.0341107	0.714959	4.8474			0.0185173	0.0866724	0.783595	4.61486
0.0351884	0.0707303	0.762649	4.90201			0.0533284	0.0356871	0.717295	4.84895			0.0175779	0.0872951	0.784641	4.61894
0.034308	0.0718248	0.76416	4.90358			0.0526905	0.037246	0.719595	4.85048			0.0166388	0.0878896	0.785664	4.62293
0.0334214	0.0728923	0.765642	4.90512			0.0520398	0.038787	0.721861	4.85203			0.0157003	0.088456	0.786665	4.62679
0.032529	0.0739328	0.767096	4.90664			0.0513766	0.0403096	0.724092	4.85365			0.0147629	0.0889945	0.787643	4.63053
0.0316312	0.074946	0.768521	4.90814			0.0507012	0.0418134	0.726289	4.85536			0.0138269	0.089505	0.788598	4.63415
0.0307284	0.0759318	0.769918	4.90961			0.0500137	0.0432979	0.728451	4.85718			0.0128927	0.0899878	0.789533	4.63766
0.0298209	0.0768903	0.771288	4.91107			0.0493145	0.0447628	0.730579	4.85913			0.0119606	0.090443	0.790445	4.64106
0.028909	0.0778212	0.772631	4.91249			0.0486037	0.0462077	0.732674	4.86118			0.011031	0.0908708	0.791337	4.64438
0.0279933	0.0787246	0.773947	4.9139			0.0478817	0.0476322	0.734734	4.86335			0.0101042	0.0912711	0.792207	4.64765
0.027074	0.0796004	0.775236	4.91528			0.0471487	0.0490359	0.736761	4.8656			0.00918058	0.0916444	0.793058	4.65087
0.0261515	0.0804486	0.776499	4.91665			0.046405	0.0504185	0.738755	4.8679			0.0082605	0.0919906	0.793888	4.65407
0.0252262	0.0812691	0.777736	4.91799			0.0456509	0.0517797	0.740716	4.87023			0.00734427	0.09231	0.794698	4.65728
0.0242984	0.0820619	0.778947	4.91931			0.0448866	0.0531192	0.742645	4.87254			0.00643224	0.0926028	0.795488	4.66051
0.0233686	0.082827	0.780133	4.92061			0.0441125	0.0544365	0.744541	4.8748			0.00552473	0.0928692	0.796259	4.66377
0.0224371	0.0835644	0.781294	4.92189			0.0433288	0.0557315	0.746404	4.87696			0.00462207	0.0931094	0.797011	4.66707
0.0215044	0.0842741	0.78243	4.92314			0.0425359	0.0570038	0.748236	4.87901			0.00372458	0.0933235	0.797744	4.6704
0.0205706	0.0849563	0.783542	4.92438			0.0417341	0.0582532	0.750036	4.88091			0.00283257	0.093512	0.798459	4.67378
0.0196363	0.0856108	0.78463	4.9256			0.0409236	0.0594795	0.751805	4.88266			0.00194634	0.0936749	0.799156	4.67718
0.0187018	0.0862378	0.785694	4.9268			0.0401049	0.0606823	0.753542	4.88425			0.00106621	0.0938125	0.799835	4.68059
0.0177674	0.0868373	0.786734	4.92798			0.0392781	0.0618614	0.755249	4.88569			0.000192463	0.093925	0.800496	4.684
0.0168336	0.0874094	0.787752	4.92915			0.0384437	0.0630167	0.756925	4.887			-0.000674601	0.0940128	0.80114	4.6874
0.0159006	0.0879542	0.788747	4.93029			0.037602	0.0641478	0.758571	4.8882			-0.0015347	0.0940761	0.801767	4.69075
0.0149689	0.0884717	0.789719	4.93142			0.0367533	0.0652547	0.760187	4.88934			-0.00238756	0.0941151	0.802377	4.69405
0.0140388	0.0889622	0.790669	4.93253			0.0358979	0.0663372	0.761773	4.89043			-0.00323289	0.0941302	0.80297	4.69728
0.0131106	0.0894257	0.791597	4.93362			0.0350362	0.067395	0.76333	4.89152			-0.00407045	0.0941216	0.803547	4.70042
0.0121848	0.0898624	0.792504	4.93469			0.0341685	0.068428	0.764858	4.89263			-0.00489996	0.0940896	0.804108	4.70348
0.0112615	0.0902723	0.793389	4.93575			0.0332952	0.0694362	0.766357	4.89381			-0.00572117	0.0940345	0.804654	4.70643
0.0103413	0.0906557	0.794254	4.93679			0.0324166	0.0704192	0.767827	4.89506			-0.00653383	0.0939567	0.805184	4.7093
0.00942441	0.0910127	0.795098	4.93782			0.031533	0.0713771	0.769269	4.89639			-0.00733771	0.0938563	0.805699	4.71208
0.00851117	0.0913435	0.795921	4.93882			0.0306449	0.0723097	0.770683	4.89783			-0.00813257	0.0937338	0.806199	4.71479
0.00760191	0.0916482	0.796725	4.93982			0.0297525	0.073217	0.772069	4.89935			-0.00891818	0.0935895	0.806684	4.71744
0.00669696	0.0919271	0.797508	4.94079			0.0288562	0.0740988	0.773428	4.90096			-0.00969432	0.0934237	0.807154	4.72004
0.00579664	0.0921804	0.798273	4.94175			0.0279563	0.074955	0.774761	4.90263			-0.0104608	0.0932366	0.80761	4.72262
0.00490127	0.0924082	0.799018	4.9427			0.0270533	0.0757857	0.776066	4.90434			-0.0112174	0.0930287	0.808053	4.72519
0.00401115	0.0926109	0.799744	4.94363			0.0261475	0.0765908	0.777345	4.90606			-0.0119639	0.0928003	0.808481	4.72776
0.00312658	0.0927885	0.800452	4.94455			0.0252391	0.0773703	0.778598	4.90776			-0.0127001	0.0925518	0.808896	4.73034
0.00224787	0.0929414	0.801141	4.94545			0.0243287	0.078124	0.779825	4.90941			-0.0134258	0.0922834	0.809297	4.73295
0.00137532	0.0930697	0.801813	4.94634			0.0234164	0.0788521	0.781026	4.911			-0.0141409	0.0919955	0.809686	4.73559
0.000509196	0.0931738	0.802467	4.94721			0.0225028	0.0795545	0.782202	4.91248			-0.0148452	0.0916885	0.810061	4.73825
-0.000350206	0.0932539	0.803103	4.94807			0.021588	0.0802312	0.783354	4.91386			-0.0155385	0.0913627	0.810424	4.74094
-0.00120261	0.0933102	0.803722	4.94891			0.0206726	0.0808823	0.784481	4.91511			-0.0162207	0.0910185	0.810774	4.74364
-0.00204775	0.093343	0.804324	4.94975			0.0197568	0.0815078	0.785583	4.91624			-0.0168916	0.0906563	0.811112	4.74635
-0.00288536	0.0933526	0.80491	4.95056			0.0188409	0.0821077	0.786662	4.91726			-0.017551	0.0902764	0.811438	4.74906
-0.00371518	0.0933392	0.805479	4.95137			0.0179254	0.0826821	0.787717	4.91819			-0.0181989	0.0898791	0.811752	4.75174
-0.00453696	0.0933032	0.806032	4.95216			0.0170105	0.0832311	0.788749	4.91903			-0.0188351	0.0894649	0.812054	4.75439
-0.00535045	0.0932448	0.806569	4.95294			0.0160966	0.0837547	0.789757	4.91983			-0.0194595	0.0890341	0.812345	4.757
-0.00615541	0.0931644	0.807091	4.95371			0.0151841	0.084253	0.790743	4.9206			-0.0200719	0.0885871	0.812624	4.75954
-0.00695161	0.0930622	0.807597	4.95447			0.0142733	0.0847261	0.791707	4.92138			-0.0206723	0.0881242	0.812893	4.76203
-0.00773883	0.0929385	0.808088	4.95521			0.0133645	0.0851742	0.792648	4.92218			-0.0212606	0.0876459	0.81315	4.76444
-0.00851684	0.0927936	0.808565	4.95594			0.012458	0.0855973	0.793568	4.92302			-0.0218366	0.0871525	0.813397	4.76678
-0.00928542	0.0926279	0.809026	4.95666			0.0115542	0.0859956	0.794466	4.92393			-0.0224003	0.0866443	0.813633	4.76905
-0.0100444	0.0924417	0.809474	4.95737			0.0106533	0.0863692	0.795343	4.92492			-0.0229516	0.0861218	0.813859	4.77126
-0.0107935	0.0922353	0.809907	4.95807			0.00975583	0.0867182	0.796199	4.92597			-0.0234904	0.0855853	0.814074	4.77342
-0.0115326	0.0920091	0.810326	4.95875			0.00886194	0.0870429	0.797034	4.9271			-0.0240167	0.0850352	0.81428	4.77553
-0.0122615	0.0917632	0.810731	4.95943			0.00797199	0.0873433	0.797849	4.92829			-0.0245303	0.0844719	0.814475	4.77761
-0.0129801	0.0914982	0.811124	4.96009			0.00708629	0.0876196	0.798644	4.92953			-0.0250313	0.0838958	0.814661	4.77967
-0.013688	0.0912144	0.811502	4.96075			0.00620513	0.087872	0.79942	4.93079			-0.0255196	0.0833072	0.814837	4.78172
-0.0143853	0.090912	0.811868	4.96139			0.00532882	0.0881007	0.800175	4.93206			-0.0259951	0.0827064	0.815004	4.78378
-0.0150716	0.0905914	0.812221	4.96202			0.00445765	0.0883059	0.800912	4.93331			-0.0264578	0.082094	0.815161	4.78584
-0.015747	0.090253	0.812561	4.96264			0.00359191	0.0884877	0.80163	4.93453			-0.0269078	0.0814702	0.81531	4.78793
-0.0164111	0.0898971	0.812889	4.96325			0.00273188	0.0886465	0.802329	4.93568			-0.0273448	0.0808354	0.815449	4.79003
-0.017064	0.0895241	0.813205	4.96386			0.00187784	0.0887823	0.80301	4.93676			-0.0277691	0.0801901	0.81558	4.79215
-0.0177054	0.0891343	0.813509	4.96445			0.00103007	0.0888955	0.803673	4.93775			-0.0281804	0.0795344	0.815702	4.79429
-0.0183352	0.0887281	0.813801	4.96503			0.000188829	0.0889862	0.804318	4.93864			-0.0285789	0.078869	0.815816	4.79644
-0.0189534	0.0883059	0.814081	4.96561			-0.000645617	0.0890547	0.804945	4.93945			-0.0289645	0.078194	0.815921	4.79859
-0.0195598	0.087868	0.81435	4.96617			-0.00147301	0.0891012	0.805555	4.94017			-0.0293373	0.0775098	0.816018	4.80073
-0.0201542	0.0874147	0.814607	4.96673			-0.0022931	0.089126	0.806149	4.94082			-0.0296971	0.0768169	0.816106	4.80285
-0.0207367	0.0869464	0.814854	4.96727			-0.00310564	0.0891293	0.806725	4.94141			-0.0300442	0.0761156	0.816187	4.80494
-0.0213071	0.0864635	0.81509	4.96781			-0.00391039	0.0891113	0.807285	4.94197			-0.0303785	0.0754063	0.81626	4.807
-0.0218653	0.0859664	0.815315	4.96834			-0.00470711	0.0890725	0.807829	4.94252			-0.0306999	0.0746892	0.816326	4.80901
-0.0224113	0.0854554	0.81553	4.96886			-0.00549559	0.0890129	0.808357	4.94307			-0.0310087	0.0739648	0.816384	4.81097
-0.022945	0.0849309	0.815734	4.96937			-0.00627559	0.0889329	0.808869	4.94364			-0.0313047	0.0732334	0.816434	4.81288
-0.0234663	0.0843932	0.815928	4.96987			-0.0070469	0.0888328	0.809366	4.94425			-0.031588	0.0724953	0.816477	4.81473
-0.0239752	0.0838427	0.816112	4.97037			-0.00780931	0.0887128	0.809848	4.94491			-0.0318588	0.071751	0.816513	4.81654
-0.0244716	0.0832797	0.816287	4.97085			-0.00856262	0.0885733	0.810314	4.94563			-0.032117	0.0710007	0.816542	4.81829
-0.0249554	0.0827047	0.816451	4.97133			-0.00930663	0.0884145	0.810766	4.94641			-0.0323627	0.0702447	0.816564	4.82
-0.0254267	0.082118	0.816607	4.9718			-0.0100412	0.0882367	0.811204	4.94724			-0.0325959	0.0694835	0.816579	4.82169
-0.0258853	0.0815199	0.816752	4.97227			-0.010766	0.0880402	0.811627	4.94812			-0.0328168	0.0687174	0.816587	4.82335
-0.0263314	0.0809108	0.816889	4.97272			-0.011481	0.0878254	0.812036	4.94904			-0.0330254	0.0679466	0.816589	4.82499
-0.0267648	0.0802911	0.817017	4.97317			-0.012186	0.0875925	0.812431	4.94997			-0.0332218	0.0671716	0.816584	4.82663
-0.0271855	0.0796612	0.817136	4.97361			-0.0128808	0.0873418	0.812813	4.9509			-0.0334061	0.0663926	0.816574	4.82828
-0.0275936	0.0790213	0.817246	4.97405			-0.0135652	0.0870737	0.813181	4.95182			-0.0335783	0.0656099	0.816556	4.82993
-0.027989	0.0783718	0.817347	4.97447			-0.0142391	0.0867884	0.813537	4.95271			-0.0337386	0.0648239	0.816533	4.83159
-0.0283717	0.0777132	0.81744	4.97489			-0.0149025	0.0864864	0.813879	4.95355			-0.033887	0.064035	0.816504	4.83327
-0.0287417	0.0770456	0.817525	4.9753			-0.015555	0.0861678	0.814208	4.95433			-0.0340237	0.0632433	0.816468	4.83495
-0.0290991	0.0763696	0.817602	4.97571			-0.0161966	0.085833	0.814525	4.95504			-0.0341486	0.0624492	0.816427	4.83665
-0.0294439	0.0756854	0.817671	4.97611			-0.0168271	0.0854825	0.81483	4.95568			-0.0342621	0.061653	0.816381	4.83835
-0.029776	0.0749935	0.817732	4.9765			-0.0174465	0.0851163	0.815123	4.95625			-0.0343641	0.060855	0.816329	4.84006
-0.0300956	0.074294	0.817785	4.97689			-0.0180547	0.084735	0.815403	4.95676			-0.0344547	0.0600554	0.816271	4.84175
-0.0304027	0.0735874	0.81783	4.97727			-0.0186514	0.0843389	0.815672	4.95722			-0.0345342	0.0592547	0.816208	4.84343
-0.0306972	0.0728741	0.817868	4.97764			-0.0192367	0.0839282	0.81593	4.95763			-0.0346025	0.058453	0.816139	4.84508
-0.0309793	0.0721542	0.817899	4.97801			-0.0198104	0.0835033	0.816176	4.95802			-0.0346599	0.0576507	0.816066	4.8467
-0.031249	0.0714283	0.817922	4.97837			-0.0203724	0.0830645	0.816411	4.9584			-0.0347065	0.056848	0.815987	4.84829
-0.0315064	0.0706966	0.817939	4.97873			-0.0209227	0.0826122	0.816635	4.95879			-0.0347423	0.0560452	0.815904	4.84984
-0.0317515	0.0699594	0.817948	4.97908			-0.0214612	0.0821466	0.816848	4.9592			-0.0347675	0.0552425	0.815815	4.85135
-0.0319843	0.0692171	0.817951	4.97942			-0.0219878	0.0816683	0.817051	4.95964			-0.0347823	0.0544403	0.815722	4.85282
-0.032205	0.06847	0.817947	4.97976			-0.0225025	0.0811773	0.817243	4.96012			-0.0347868	0.0536387	0.815624	4.85425
-0.0324136	0.0677184	0.817936	4.98009			-0.0230051	0.0806742	0.817425	4.96065			-0.0347811	0.0528381	0.815522	4.85564
-0.0326102	0.0669626	0.817919	4.98042			-0.0234957	0.0801592	0.817597	4.96122			-0.0347653	0.0520386	0.815415	4.85701
-0.0327949	0.066203	0.817895	4.98074			-0.0239742	0.0796327	0.817759	4.96183			-0.0347397	0.0512406	0.815304	4.85835
-0.0329678	0.0654398	0.817866	4.98106			-0.0244405	0.079095	0.817912	4.96248			-0.0347043	0.0504442	0.815189	4.85967
-0.0331289	0.0646733	0.81783	4.98137			-0.0248947	0.0785464	0.818055	4.96316			-0.0346593	0.0496497	0.815069	4.86099
-0.0332784	0.0639039	0.817788	4.98167			-0.0253367	0.0779873	0.818188	4.96385			-0.0346049	0.0488574	0.814945	4.8623
-0.0334163	0.0631319	0.81774	4.98198			-0.0257664	0.077418	0.818312	4.96453			-0.0345412	0.0480674	0.814817	4.86361
-0.0335427	0.0623574	0.817687	4.98227			-0.026184	0.0768388	0.818427	4.96521			-0.0344683	0.04728	0.814686	4.86492
-0.0336579	0.061581	0.817627	4.98256			-0.0265892	0.0762501	0.818533	4.96586			-0.0343865	0.0464953	0.81455	4.86625
-0.0337617	0.0608027	0.817563	4.98285			-0.0269823	0.0756522	0.81863	4.96647			-0.0342958	0.0457137	0.814411	4.86758
-0.0338545	0.0600229	0.817492	4.98313			-0.0273631	0.0750453	0.818719	4.96703			-0.0341965	0.0449352	0.814269	4.86892
-0.0339362	0.0592419	0.817417	4.98341			-0.0277316	0.07443	0.818799	4.96754			-0.0340887	0.0441602	0.814122	4.87027
-0.0340071	0.05846	0.817336	4.98368			-0.028088	0.0738064	0.818871	4.968			-0.0339725	0.0433888	0.813972	4.87162
-0.0340671	0.0576773	0.81725	4.98395			-0.0284321	0.0731749	0.818935	4.9684			-0.0338481	0.0426212	0.813819	4.87297
-0.0341165	0.0568943	0.817159	4.98421			-0.028764	0.0725358	0.81899	4.96876			-0.0337157	0.0418575	0.813663	4.87431
-0.0341554	0.0561111	0.817063	4.98447			-0.0290838	0.0718894	0.819038	4.96907			-0.0335755	0.041098	0.813503	4.87563
-0.0341839	0.055328	0.816962	4.98472			-0.0293914	0.0712361	0.819078	4.96936			-0.0334276	0.0403429	0.813341	4.87694
-0.0342022	0.0545452	0.816857	4.98497			-0.0296869	0.0705761	0.81911	4.96963			-0.0332721	0.0395923	0.813175	4.87822
-0.0342103	0.0537631	0.816747	4.98522			-0.0299704	0.0699098	0.819135	4.9699			-0.0331093	0.0388463	0.813006	4.87948
-0.0342084	0.0529818	0.816632	4.98546			-0.0302419	0.0692375	0.819152	4.97017			-0.0329393	0.0381052	0.812835	4.8807
-0.0341967	0.0522016	0.816513	4.9857			-0.0305015	0.0685595	0.819163	4.97046			-0.0327623	0.0373691	0.812661	4.8819
-0.0341753	0.0514227	0.81639	4.98593			-0.0307491	0.067876	0.819166	4.97078			-0.0325785	0.0366382	0.812484	4.88306
-0.0341443	0.0506454	0.816262	4.98617			-0.030985	0.0671875	0.819162	4.97113			-0.0323879	0.0359125	0.812305	4.88419
-0.0341038	0.0498698	0.81613	4.98639			-0.031209	0.0664941	0.819151	4.97152			-0.0321909	0.0351924	0.812123	4.8853
-0.0340542	0.0490962	0.815994	4.98661			-0.0314214	0.0657963	0.819134	4.97194			-0.0319875	0.0344778	0.811938	4.88639
-0.0339954	0.0483249	0.815855	4.98683			-0.0316221	0.0650942	0.81911	4.97239			-0.031778	0.0337689	0.811752	4.88746
-0.0339276	0.0475559	0.815711	4.98705			-0.0318113	0.0643882	0.819079	4.97287			-0.0315624	0.0330658	0.811563	4.88851
-0.033851	0.0467897	0.815564	4.98726			-0.031989	0.0636786	0.819042	4.97337			-0.031341	0.0323688	0.811371	4.88956
-0.0337657	0.0460262	0.815413	4.98747			-0.0321553	0.0629656	0.818999	4.97387			-0.031114	0.0316779	0.811178	4.89061
-0.033672	0.0452658	0.815258	4.98767			-0.0323103	0.0622495	0.81895	4.97438			-0.0308815	0.0309931	0.810983	4.89165
-0.0335699	0.0445086	0.8151	4.98787			-0.0324541	0.0615307	0.818895	4.97487			-0.0306436	0.0303147	0.810786	4.8927
-0.0334596	0.0437548	0.814939	4.98807			-0.0325868	0.0608093	0.818834	4.97535			-0.0304006	0.0296427	0.810587	4.89376
-0.0333412	0.0430047	0.814774	4.98827			-0.0327085	0.0600856	0.818767	4.97579			-0.0301526	0.0289773	0.810386	4.89482
-0.033215	0.0422583	0.814606	4.98846			-0.0328193	0.05936	0.818695	4.97619			-0.0298998	0.0283185	0.810183	4.89588
-0.0330811	0.0415159	0.814435	4.98865			-0.0329193	0.0586326	0.818617	4.97656			-0.0296424	0.0276664	0.809979	4.89695
-0.0329396	0.0407776	0.814261	4.98883			-0.0330086	0.0579038	0.818534	4.97688			-0.0293805	0.0270212	0.809773	4.89802
-0.0327908	0.0400436	0.814083	4.98901			-0.0330873	0.0571738	0.818445	4.97717			-0.0291143	0.0263828	0.809566	4.89909
-0.0326348	0.039314	0.813904	4.98919			-0.0331555	0.0564428	0.818351	4.97742			-0.0288439	0.0257515	0.809357	4.90015
-0.0324716	0.0385891	0.813721	4.98937			-0.0332134	0.0557111	0.818252	4.97764			-0.0285695	0.0251271	0.809147	4.9012
-0.0323016	0.0378689	0.813535	4.98954			-0.0332611	0.054979	0.818148	4.97784			-0.0282914	0.02451	0.808935	4.90223
-0.0321249	0.0371536	0.813347	4.98971			-0.0332986	0.0542466	0.818039	4.97802			-0.0280096	0.0239	0.808723	4.90324
-0.0319416	0.0364434	0.813157	4.98988			-0.0333262	0.0535142	0.817926	4.97821			-0.0277242	0.0232973	0.808509	4.90423
-0.031752	0.0357384	0.812964	4.99004			-0.033344	0.0527821	0.817808	4.9784			-0.0274356	0.0227019	0.808294	4.9052
-0.0315561	0.0350388	0.812769	4.99021			-0.033352	0.0520504	0.817685	4.97861			-0.0271438	0.0221139	0.808079	4.90615
-0.0313541	0.0343445	0.812571	4.99037			-0.0333504	0.0513195	0.817557	4.97884			-0.026849	0.0215333	0.807862	4.90707
-0.0311463	0.0336559	0.812371	4.99052			-0.0333394	0.0505894	0.817426	4.97909			-0.0265513	0.0209603	0.807644	4.90797
-0.0309327	0.032973	0.812169	4.99068			-0.0333191	0.0498605	0.81729	4.97937			-0.0262509	0.0203947	0.807426	4.90885
-0.0307136	0.0322959	0.811966	4.99083			-0.0332895	0.049133	0.81715	4.97968			-0.025948	0.0198367	0.807207	4.90972
-0.030489	0.0316247	0.81176	4.99098			-0.033251	0.048407	0.817006	4.98002			-0.0256427	0.0192863	0.806987	4.91057
-0.0302593	0.0309596	0.811552	4.99112			-0.0332036	0.0476827	0.816858	4.98037			-0.0253352	0.0187436	0.806767	4.91141
-0.0300245	0.0303006	0.811343	4.99127			-0.0331474	0.0469604	0.816706	4.98074			-0.0250256	0.0182085	0.806546	4.91225
-0.0297848	0.0296478	0.811131	4.99141			-0.0330826	0.0462403	0.81655	4.98111			-0.024714	0.0176811	0.806324	4.91308
-0.0295403	0.0290014	0.810918	4.99155			-0.0330093	0.0455225	0.816391	4.98148			-0.0244007	0.0171614	0.806103	4.91392
-0.0292913	0.0283614	0.810704	4.99168			-0.0329278	0.0448073	0.816228	4.98184			-0.0240857	0.0166495	0.80588	4.91475
-0.0290379	0.0277279	0.810488	4.99182			-0.0328381	0.0440947	0.816062	4.98219			-0.0237692	0.0161453	0.805658	4.91559
-0.0287803	0.0271011	0.810271	4.99195			-0.0327404	0.0433851	0.815892	4.98251			-0.0234514	0.0156489	0.805435	4.91644
-0.0285185	0.0264809	0.810052	4.99208			-0.0326348	0.0426785	0.815719	4.9828			-0.0231323	0.0151602	0.805212	4.91729
-0.0282529	0.0258674	0.809832	4.99221			-0.0325216	0.0419752	0.815542	4.98306			-0.0228122	0.0146793	0.804989	4.91813
-0.0279835	0.0252608	0.809611	4.99234			-0.0324008	0.0412753	0.815363	4.98329			-0.0224911	0.0142062	0.804766	4.91898
-0.0277105	0.024661	0.809389	4.99246			-0.0322726	0.0405789	0.815181	4.98349			-0.0221692	0.0137409	0.804543	4.91983
-0.0274341	0.0240682	0.809165	4.99258			-0.0321372	0.0398863	0.814995	4.98367			-0.0218467	0.0132834	0.80432	4.92066
-0.0271544	0.0234824	0.808941	4.9927			-0.0319947	0.0391975	0.814807	4.98382			-0.0215236	0.0128336	0.804097	4.92149
-0.0268715	0.0229037	0.808716	4.99282			-0.0318453	0.0385127	0.814616	4.98396			-0.0212001	0.0123916	0.803874	4.92231
-0.0265857	0.0223321	0.80849	4.99293			-0.0316892	0.0378322	0.814423	4.98408			-0.0208763	0.0119573	0.803651	4.92311
-0.0262971	0.0217676	0.808263	4.99305			-0.0315264	0.0371559	0.814226	4.98421			-0.0205524	0.0115308	0.803429	4.92389
-0.0260058	0.0212103	0.808035	4.99316			-0.0313572	0.0364841	0.814028	4.98435			-0.0202284	0.011112	0.803207	4.92466
-0.025712	0.0206603	0.807807	4.99327			-0.0311817	0.0358169	0.813827	4.9845			-0.0199045	0.0107009	0.802985	4.92541
-0.0254158	0.0201176	0.807578	4.99338			-0.0310001	0.0351544	0.813623	4.98466			-0.0195809	0.0102974	0.802763	4.92614
-0.0251174	0.0195821	0.807349	4.99349			-0.0308126	0.0344967	0.813418	4.98485			-0.0192575	0.00990158	0.802542	4.92686
-0.024817	0.019054	0.807119	4.99359			-0.0306192	0.0338439	0.81321	4.98505			-0.0189346	0.00951338	0.802322	4.92756
-0.0245146	0.0185333	0.806889	4.99369			-0.0304202	0.0331963	0.813	4.98528			-0.0186123	0.00913276	0.802102	4.92825
-0.0242105	0.0180199	0.806658	4.9938			-0.0302157	0.0325538	0.812788	4.98553			-0.0182906	0.0087597	0.801882	4.92893
-0.0239047	0.017514	0.806427	4.99389			-0.0300059	0.0319166	0.812574	4.98579			-0.0179697	0.00839415	0.801664	4.9296
-0.0235974	0.0170155	0.806196	4.99399			-0.0297909	0.0312848	0.812359	4.98606			-0.0176497	0.00803608	0.801445	4.93027
-0.0232888	0.0165244	0.805965	4.99409			-0.0295709	0.0306584	0.812141	4.98634			-0.0173306	0.00768545	0.801228	4.93093
-0.0229789	0.0160407	0.805734	4.99418			-0.0293461	0.0300377	0.811922	4.98661			-0.0170127	0.00734221	0.801011	4.9316
-0.022668	0.0155646	0.805502	4.99428			-0.0291166	0.0294227	0.811701	4.98687			-0.0166959	0.00700633	0.800795	4.93226
-0.0223561	0.0150958	0.805271	4.99437			-0.0288826	0.0288134	0.811479	4.98713			-0.0163804	0.00667775	0.80058	4.93293
-0.0220434	0.0146345	0.805039	4.99446			-0.0286442	0.0282099	0.811255	4.98736			-0.0160663	0.00635643	0.800365	4.9336
-0.02173	0.0141807	0.804808	4.99455			-0.0284015	0.0276124	0.81103	4.98757			-0.0157537	0.00604231	0.800152	4.93428
-0.0214161	0.0137343	0.804577	4.99464			-0.0281548	0.0270209	0.810804	4.98776			-0.0154427	0.00573535	0.799939	4.93495
-0.0211017	0.0132954	0.804346	4.99472			-0.0279042	0.0264355	0.810577	4.98792			-0.0151333	0.00543549	0.799728	4.93562
-0.020787	0.0128638	0.804115	4.99481			-0.0276499	0.0258563	0.810348	4.98806			-0.0148256	0.00514267	0.799517	4.93629
-0.0204722	0.0124397	0.803885	4.99489			-0.027392	0.0252832	0.810118	4.98818			-0.0145198	0.00485684	0.799307	4.93695
-0.0201572	0.012023	0.803655	4.99497			-0.0271306	0.0247164	0.809887	4.98828			-0.0142159	0.00457795	0.799099	4.93761
-0.0198424	0.0116137	0.803426	4.99505			-0.0268659	0.024156	0.809655	4.98838			-0.013914	0.00430592	0.798891	4.93826
-0.0195277	0.0112117	0.803197	4.99513			-0.0265981	0.0236019	0.809423	4.98846			-0.0136141	0.00404069	0.798685	4.93889
-0.0192132	0.010817	0.802968	4.99521			-0.0263272	0.0230543	0.809189	4.98855			-0.0133164	0.00378222	0.798479	4.93951
-0.0188992	0.0104297	0.80274	4.99529			-0.0260536	0.0225132	0.808955	4.98865			-0.0130209	0.00353042	0.798275	4.94012
-0.0185857	0.0100496	0.802513	4.99536			-0.0257772	0.0219786	0.80872	4.98875			-0.0127277	0.00328523	0.798072	4.94071
-0.0182728	0.00967681	0.802286	4.99544			-0.0254983	0.0214506	0.808485	4.98887			-0.0124368	0.00304659	0.79787	4.9413
-0.0179606	0.00931121	0.80206	4.99551			-0.025217	0.0209292	0.808248	4.98901			-0.0121484	0.00281443	0.79767	4.94186
-0.0176493	0.00895278	0.801834	4.99558			-0.0249334	0.0204145	0.808012	4.98916			-0.0118625	0.00258867	0.79747	4.94242
-0.0173388	0.0086015	0.80161	4.99565			-0.0246477	0.0199064	0.807775	4.98933			-0.0115791	0.00236925	0.797272	4.94297
-0.0170294	0.00825732	0.801386	4.99572			-0.0243599	0.0194051	0.807538	4.98951			-0.0112983	0.0021561	0.797076	4.94351
-0.0167212	0.00792021	0.801163	4.99579			-0.0240704	0.0189104	0.8073	4.9897			-0.0110202	0.00194913	0.79688	4.94405
-0.0164141	0.0075901	0.800941	4.99586			-0.0237791	0.0184225	0.807062	4.9899			-0.0107448	0.00174829	0.796686	4.94458
-0.0161084	0.00726698	0.80072	4.99592			-0.0234863	0.0179414	0.806824	4.99011			-0.0104722	0.00155349	0.796494	4.94511
-0.015804	0.00695077	0.800499	4.99599			-0.0231921	0.0174671	0.806586	4.99031			-0.0102024	0.00136466	0.796302	4.94564
-0.0155012	0.00664145	0.80028	4.99605			-0.0228965	0.0169996	0.806348	4.9905			-0.00993554	0.00118171	0.796113	4.94617
-0.0151999	0.00633895	0.800062	4.99611			-0.0225997	0.0165389	0.806109	4.99069			-0.00967158	0.00100459	0.795924	4.94671
-0.0149003	0.00604323	0.799844	4.99618			-0.022302	0.016085	0.805871	4.99086			-0.00941058	0.000833198	0.795737	4.94724
-0.0146025	0.00575422	0.799628	4.99624			-0.0220033	0.0156379	0.805633	4.99101			-0.00915261	0.000667465	0.795552	4.94777
-0.0143065	0.00547189	0.799413	4.9963			-0.0217038	0.0151977	0.805395	4.99114			-0.00889769	0.000507312	0.795367	4.94831
-0.0140124	0.00519616	0.799199	4.99636			-0.0214036	0.0147643	0.805157	4.99126			-0.00864586	0.000352658	0.795185	4.94884
-0.0137202	0.00492698	0.798986	4.99641			-0.0211029	0.0143377	0.80492	4.99135			-0.00839717	0.000203423	0.795004	4.94937
-0.0134302	0.0046643	0.798775	4.99647			-0.0208018	0.0139179	0.804682	4.99144			-0.00815165	5.95258e-05	0.794824	4.9499
-0.0131422	0.00440804	0.798565	4.99653			-0.0205003	0.0135049	0.804446	4.99151			-0.00790933	-7.91138e-05	0.794646	4.95042
-0.0128565	0.00415816	0.798356	4.99658			-0.0201987	0.0130987	0.804209	4.99157			-0.00767025	-0.000212578	0.79447	4.95093
-0.012573	0.00391458	0.798148	4.99664			-0.019897	0.0126993	0.803973	4.99163			-0.00743442	-0.000340948	0.794295	4.95143
-0.0122918	0.00367724	0.797941	4.99669			-0.0195953	0.0123067	0.803738	4.9917			-0.00720189	-0.000464306	0.794121	4.95192
-0.012013	0.00344607	0.797736	4.99674			-0.0192938	0.0119208	0.803503	4.99176			-0.00697267	-0.000582735	0.793949	4.9524
-0.0117367	0.00322102	0.797532	4.99679			-0.0189925	0.0115416	0.803268	4.99184			-0.00674679	-0.000696318	0.793779	4.95288
-0.0114629	0.00300201	0.79733	4.99685			-0.0186917	0.0111692	0.803034	4.99192			-0.00652427	-0.000805136	0.79361	4.95334
-0.0111917	0.00278897	0.797129	4.9969			-0.0183912	0.0108034	0.802801	4.99202			-0.00630513	-0.000909274	0.793443	4.95379
-0.0109231	0.00258183	0.796929	4.99694			-0.0180914	0.0104443	0.802569	4.99213			-0.0060894	-0.00100881	0.793278	4.95423
-0.0106571	0.00238053	0.796731	4.99699			-0.0177922	0.0100918	0.802337	4.99226			-0.00587707	-0.00110384	0.793114	4.95467
-0.0103939	0.00218498	0.796534	4.99704			-0.0174938	0.00974586	0.802106	4.99239			-0.00566818	-0.00119443	0.792952	4.9551
-0.0101335	0.00199513	0.796338	4.99709			-0.0171963	0.00940651	0.801876	4.99254			-0.00546273	-0.00128068	0.792791	4.95553
-0.00987587	0.0018109	0.796145	4.99713			-0.0168997	0.00907369	0.801647	4.99269			-0.00526074	-0.00136266	0.792632	4.95595
-0.00962111	0.00163221	0.795952	4.99718			-0.0166042	0.00874736	0.801419	4.99284			-0.0050622	-0.00144045	0.792475	4.95638
-0.00936926	0.00145898	0.795761	4.99722			-0.0163098	0.00842748	0.801192	4.99298			-0.00486715	-0.00151415	0.792319	4.9568
-0.00912035	0.00129116	0.795572	4.99727			-0.0160167	0.00811402	0.800965	4.99313			-0.00467556	-0.00158383	0.792165	4.95722
-0.00887443	0.00112865	0.795384	4.99731			-0.0157249	0.00780692	0.80074	4.99326			-0.00448747	-0.00164958	0.792012	4.95765
-0.00863153	0.000971392	0.795198	4.99735			-0.0154345	0.00750616	0.800516	4.99338			-0.00430286	-0.00171148	0.791861	4.95807
-0.00839168	0.000819299	0.795014	4.9974			-0.0151456	0.00721167	0.800293	4.99349			-0.00412173	-0.0017696	0.791712	4.9585
-0.00815493	0.000672298	0.79483	4.99744			-0.0148583	0.00692343	0.800071	4.99359			-0.0039441	-0.00182404	0.791565	4.95892
-0.00792129	0.000530313	0.794649	4.99748			-0.0145726	0.00664137	0.79985	4.99367			-0.00376995	-0.00187487	0.791419	4.95934
-0.00769079	0.000393266	0.794469	4.99752			-0.0142887	0.00636546	0.79963	4.99374			-0.00359928	-0.00192218	0.791274	4.95976
-0.00746347	0.000261079	0.794291	4.99756			-0.0140066	0.00609563	0.799412	4.99379			-0.0034321	-0.00196604	0.791132	4.96018
-0.00723935	0.000133675	0.794114	4.9976			-0.0137263	0.00583184	0.799194	4.99384			-0.00326839	-0.00200654	0.790991	4.96059
-0.00701844	1.0976e-05	0.793939	4.99763			-0.013448	0.00557404	0.798978	4.99389			-0.00310814	-0.00204376	0.790851	4.961
-0.00680079	-0.000107096	0.793766	4.99767			-0.0131716	0.00532217	0.798764	4.99393			-0.00295136	-0.00207777	0.790714	4.96139
-0.00658639	-0.00022062	0.793594	4.99771			-0.0128974	0.00507618	0.79855	4.99397			-0.00279802	-0.00210866	0.790577	4.96178
-0.00637527	-0.000329674	0.793424	4.99774			-0.0126253	0.00483601	0.798338	4.99402			-0.00264812	-0.0021365	0.790443	4.96217
-0.00616745	-0.000434336	0.793256	4.99778			-0.0123554	0.0046016	0.798127	4.99407			-0.00250165	-0.00216138	0.79031	4.96254
-0.00596294	-0.000534685	0.793089	4.99782			-0.0120878	0.00437289	0.797918	4.99413			-0.00235859	-0.00218336	0.790179	4.96291
-0.00576175	-0.000630799	0.792924	4.99785			-0.0118225	0.00414983	0.79771	4.99421			-0.00221893	-0.00220253	0.790049	4.96327
-0.0055639	-0.000722757	0.792761	4.99788			-0.0115595	0.00393235	0.797503	4.99429			-0.00208265	-0.00221897	0.789921	4.96362
-0.00536939	-0.000810637	0.792599	4.99792			-0.011299	0.0037204	0.797298	4.99438			-0.00194973	-0.00223274	0.789795	4.96397
-0.00517823	-0.000894517	0.792439	4.99795			-0.011041	0.00351391	0.797095	4.99448			-0.00182017	-0.00224393	0.78967	4.96431
-0.00499044	-0.000974477	0.792281	4.99798			-0.0107855	0.00331281	0.796892	4.99459			-0.00169393	-0.00225261	0.789547	4.96465
-0.004806	-0.00105059	0.792124	4.99802			-0.0105326	0.00311705	0.796692	4.9947			-0.001571	-0.00225885	0.789426	4.96499
-0.00462493	-0.00112294	0.79197	4.99805			-0.0102823	0.00292656	0.796493	4.99481			-0.00145136	-0.00226273	0.789306	4.96533
-0.00444723	-0.0011916	0.791816	4.99808			-0.0100347	0.00274127	0.796295	4.99492			-0.00133498	-0.00226431	0.789187	4.96567
-0.00427289	-0.00125666	0.791665	4.99811			-0.00978979	0.00256112	0.796099	4.99502			-0.00122184	-0.00226368	0.789071	4.96601
-0.00410193	-0.00131817	0.791515	4.99814			-0.00954764	0.00238604	0.795904	4.99512			-0.00111192	-0.0022609	0.788956	4.96634
-0.00393433	-0.00137623	0.791367	4.99817			-0.00930827	0.00221597	0.795711	4.99521			-0.0010052	-0.00225605	0.788842	4.96668
-0.00377008	-0.00143091	0.79122	4.9982			-0.00907174	0.00205084	0.79552	4.99529			-0.000901637	-0.00224918	0.78873	4.96702
-0.0036092	-0.00148229	0.791076	4.99822			-0.00883806	0.00189058	0.79533	4.99536			-0.000801217	-0.00224038	0.78862	4.96735
-0.00345166	-0.00153044	0.790933	4.99825			-0.00860728	0.00173512	0.795142	4.99541			-0.00070391	-0.00222971	0.788511	4.96769
-0.00329746	-0.00157543	0.790791	4.99828			-0.00837943	0.0015844	0.794956	4.99546			-0.000609687	-0.00221724	0.788403	4.96802
-0.0031466	-0.00161735	0.790652	4.99831			-0.00815452	0.00143834	0.794771	4.9955			-0.000518518	-0.00220303	0.788297	4.96835
-0.00299906	-0.00165626	0.790514	4.99833			-0.0079326	0.00129687	0.794588	4.99553			-0.000430375	-0.00218714	0.788193	4.96868
-0.00285482	-0.00169224	0.790377	4.99836			-0.00771368	0.00115993	0.794406	4.99556			-0.000345226	-0.00216966	0.78809	4.969
-0.00271389	-0.00172536	0.790243	4.99839			-0.0074978	0.00102745	0.794226	4.99559			-0.00026304	-0.00215063	0.787989	4.96931
-0.00257623	-0.0017557	0.79011	4.99841			-0.00728496	0.000899352	0.794048	4.99562			-0.000183785	-0.00213012	0.787889	4.96962
-0.00244185	-0.00178333	0.789979	4.99844			-0.0070752	0.000775571	0.793872	4.99565			-0.000107429	-0.0021082	0.787791	4.96993
-0.00231071	-0.00180832	0.789849	4.99846			-0.00686853	0.000656035	0.793697	4.99569			-3.39383e-05	-0.00208492	0.787694	4.97022
-0.00218281	-0.00183074	0.789721	4.99849			-0.00666496	0.000540674	0.793524	4.99574			3.67208e-05	-0.00206034	0.787599	4.97052
-0.00205813	-0.00185066	0.789595	4.99851			-0.00646452	0.000429417	0.793353	4.99579			0.000104583	-0.00203454	0.787505	4.9708
-0.00193664	-0.00186816	0.78947	4.99853			-0.00626722	0.000322194	0.793183	4.99585			0.000169682	-0.00200756	0.787413	4.97108
-0.00181833	-0.00188329	0.789347	4.99856			-0.00607306	0.000218934	0.793015	4.99592			0.000232055	-0.00197945	0.787322	4.97136
-0.00170318	-0.00189614	0.789226	4.99858			-0.00588207	0.000119567	0.792849	4.996			0.000291736	-0.00195029	0.787232	4.97164
-0.00159115	-0.00190676	0.789106	4.9986			-0.00569424	2.40216e-05	0.792684	4.99608			0.000348763	-0.00192013	0.787144	4.97191
-0.00148224	-0.00191524	0.788988	4.99862			-0.0055096	-6.77725e-05	0.792521	4.99616			0.000403172	-0.00188901	0.787057	4.97218
-0.00137641	-0.00192162	0.788872	4.99865			-0.00532813	-0.000155885	0.79236	4.99624			0.000455	-0.001857	0.786972	4.97245
-0.00127364	-0.00192598	0.788757	4.99867			-0.00514985	-0.000240388	0.792201	4.99632			0.000504285	-0.00182415	0.786888	4.97272
-0.00117391	-0.00192839	0.788644	4.99869			-0.00497476	-0.000321349	0.792043	4.9964			0.000551064	-0.00179051	0.786806	4.97298
-0.00107719	-0.00192891	0.788532	4.99871			-0.00480286	-0.00039884	0.791887	4.99647			0.000595377	-0.00175613	0.786725	4.97325
-0.000983445	-0.00192759	0.788422	4.99873			-0.00463416	-0.00047293	0.791733	4.99653			0.000637261	-0.00172106	0.786645	4.97352
-0.000892655	-0.00192452	0.788314	4.99875			-0.00446865	-0.000543688	0.791581	4.99659			0.000676755	-0.00168536	0.786567	4.97379
-0.000804789	-0.00191974	0.788207	4.99877			-0.00430632	-0.000611184	0.79143	4.99664			0.000713899	-0.00164906	0.78649	4.97406
-0.000719818	-0.00191332	0.788101	4.99879			-0.00414719	-0.000675486	0.791281	4.99668			0.000748733	-0.00161223	0.786414	4.97432
-0.000637712	-0.00190532	0.787998	4.99881			-0.00399123	-0.000736664	0.791134	4.99671			0.000781294	-0.0015749	0.786339	4.97459
-0.000558439	-0.0018958	0.787895	4.99883			-0.00383845	-0.000794785	0.790988	4.99674			0.000811624	-0.00153712	0.786266	4.97485
-0.000481969	-0.00188483	0.787795	4.99885			-0.00368883	-0.000849918	0.790845	4.99676			0.000839763	-0.00149893	0.786195	4.97511
-0.000408269	-0.00187244	0.787696	4.99886			-0.00354238	-0.000902129	0.790703	4.99678			0.00086575	-0.00146039	0.786124	4.97536
-0.000337308	-0.00185872	0.787598	4.99888			-0.00339907	-0.000951487	0.790562	4.9968			0.000889626	-0.00142153	0.786055	4.97561
-0.000269051	-0.0018437	0.787502	4.9989			-0.0032589	-0.000998058	0.790424	4.99682			0.000911432	-0.00138239	0.785987	4.97585
-0.000203465	-0.00182746	0.787407	4.99892			-0.00312185	-0.00104191	0.790287	4.99684			0.000931207	-0.00134302	0.78592	4.9761
-0.000140516	-0.00181003	0.787314	4.99893			-0.00298792	-0.0010831	0.790152	4.99687			0.000948993	-0.00130345	0.785855	4.97633
-8.01698e-05	-0.00179149	0.787223	4.99895			-0.00285709	-0.00112171	0.790018	4.9969			0.00096483	-0.00126373	0.785791	4.97656
-2.23911e-05	-0.00177187	0.787132	4.99897			-0.00272934	-0.00115779	0.789886	4.99694			0.000978758	-0.0012239	0.785728	4.97679
3.28556e-05	-0.00175124	0.787044	4.99898			-0.00260465	-0.00119142	0.789756	4.99699			0.00099082	-0.00118398	0.785666	4.97702
8.56061e-05	-0.00172964	0.786956	4.999			-0.00248302	-0.00122264	0.789628	4.99704			0.00100105	-0.00114402	0.785605	4.97724
0.000135897	-0.00170713	0.786871	4.99902			-0.00236442	-0.00125153	0.789501	4.99709			0.0010095	-0.00110406	0.785546	4.97746
0.000183764	-0.00168375	0.786786	4.99903			-0.00224883	-0.00127816	0.789376	4.99715			0.00101621	-0.00106412	0.785488	4.97767
0.000229244	-0.00165955	0.786703	4.99905			-0.00213623	-0.00130257	0.789253	4.99721			0.00102121	-0.00102425	0.785431	4.97789
0.000272375	-0.00163459	0.786622	4.99906			-0.0020266	-0.00132484	0.789131	4.99728			0.00102454	-0.000984464	0.785375	4.9781
0.000313194	-0.0016089	0.786542	4.99908			-0.00191992	-0.00134503	0.789011	4.99734			0.00102625	-0.000944807	0.78532	4.97832
0.000351739	-0.00158255	0.786463	4.99909			-0.00181617	-0.00136319	0.788893	4.99739			0.00102638	-0.000905308	0.785267	4.97853
0.000388048	-0.00155556	0.786385	4.99911			-0.00171532	-0.00137939	0.788776	4.99744			0.00102496	-0.000865995	0.785214	4.97874
0.000422159	-0.00152799	0.786309	4.99912			-0.00161735	-0.00139368	0.788661	4.99749			0.00102205	-0.000826899	0.785163	4.97896
0.00045411	-0.00149988	0.786235	4.99913			-0.00152223	-0.00140612	0.788548	4.99753			0.00101767	-0.000788047	0.785112	4.97917
0.00048394	-0.00147127	0.786161	4.99915			-0.00142995	-0.00141678	0.788436	4.99757			0.00101186	-0.000749467	0.785063	4.97938
0.000511687	-0.0014422	0.786089	4.99916			-0.00134046	-0.0014257	0.788326	4.99759			0.00100468	-0.000711186	0.785015	4.97959
0.000537391	-0.00141272	0.786018	4.99917			-0.00125374	-0.00143295	0.788217	4.99762			0.000996149	-0.000673228	0.784968	4.9798
0.000561091	-0.00138287	0.785949	4.99919			-0.00116978	-0.00143858	0.78811	4.99763			0.000986315	-0.00063562	0.784922	4.98001
0.000582825	-0.00135268	0.785881	4.9992			-0.00108853	-0.00144265	0.788005	4.99765			0.000975215	-0.000598385	0.784877	4.98021
0.000602632	-0.00132219	0.785814	4.99921			-0.00100997	-0.0014452	0.787901	4.99766			0.00096289	-0.000561546	0.784833	4.98042
0.000620552	-0.00129145	0.785748	4.99923			-0.000934066	-0.0014463	0.787798	4.99767			0.000949376	-0.000525125	0.78479	4.98061
0.000636625	-0.00126048	0.785684	4.99924			-0.000860793	-0.001446	0.787698	4.99769			0.000934713	-0.000489145	0.784748	4.98081
0.000650888	-0.00122933	0.785621	4.99925			-0.000790119	-0.00144435	0.787599	4.99771			0.000918938	-0.000453625	0.784707	4.981
0.000663382	-0.00119802	0.785559	4.99926			-0.000722011	-0.0014414	0.787501	4.99773			0.00090209	-0.000418586	0.784667	4.98119
0.000674146	-0.0011666	0.785499	4.99927			-0.000656439	-0.0014372	0.787405	4.99775			0.000884206	-0.000384046	0.784628	4.98137
0.000683219	-0.00113509	0.785439	4.99928			-0.00059337	-0.0014318	0.78731	4.99778			0.000865323	-0.000350025	0.78459	4.98155
0.00069064	-0.00110353	0.785381	4.9993			-0.000532771	-0.00142526	0.787217	4.99781			0.000845478	-0.000316539	0.784553	4.98173
0.000696448	-0.00107195	0.785324	4.99931			-0.000474609	-0.00141761	0.787126	4.99785			0.000824707	-0.000283606	0.784517	4.98191
0.000700682	-0.00104038	0.785268	4.99932			-0.000418851	-0.00140891	0.787035	4.99789			0.000803047	-0.000251241	0.784481	4.98208
0.000703382	-0.00100885	0.785214	4.99933			-0.000365463	-0.00139921	0.786947	4.99794			0.000780534	-0.000219459	0.784447	4.98225
0.000704585	-0.000977393	0.78516	4.99934			-0.00031441	-0.00138855	0.78686	4.99798			0.000757204	-0.000188275	0.784414	4.98243
0.000704331	-0.000946031	0.785108	4.99935			-0.000265659	-0.00137697	0.786774	4.99803			0.00073309	-0.000157703	0.784381	4.9826
0.000702659	-0.000914794	0.785056	4.99936			-0.000219174	-0.00136453	0.78669	4.99807			0.000708229	-0.000127756	0.784349	4.98277
0.000699606	-0.000883707	0.785006	4.99937			-0.00017492	-0.00135126	0.786607	4.99811			0.000682655	-9.84455e-05	0.784319	4.98294
0.000695211	-0.000852798	0.784957	4.99938			-0.000132863	-0.00133721	0.786526	4.99815			0.000656402	-6.9784e-05	0.784289	4.98311
0.000689511	-0.000822091	0.784909	4.99939			-9.29649e-05	-0.00132242	0.786446	4.99818			0.000629503	-4.1782e-05	0.78426	4.98328
0.000682546	-0.00079161	0.784862	4.9994			-5.51917e-05	-0.00130693	0.786367	4.99821			0.000601992	-1.44498e-05	0.784231	4.98345
0.000674351	-0.000761379	0.784817	4.99941			-1.95067e-05	-0.00129079	0.78629	4.99824			0.000573902	1.22031e-05	0.784204	4.98361
0.000664966	-0.000731419	0.784772	4.99942			1.41262e-05	-0.00127403	0.786214	4.99826			0.000545264	3.81677e-05	0.784177	4.98378
0.000654426	-0.000701754	0.784728	4.99943			4.57435e-05	-0.00125669	0.78614	4.99827			0.000516112	6.34359e-05	0.784152	4.98395
0.000642769	-0.000672403	0.784685	4.99944			7.53816e-05	-0.00123882	0.786066	4.99828			0.000486476	8.80001e-05	0.784127	4.98411
0.000630032	-0.000643387	0.784644	4.99945			0.000103077	-0.00122044	0.785995	4.99829			0.000456389	0.000111853	0.784102	4.98427
0.00061625	-0.000614726	0.784603	4.99945			0.000128868	-0.0012016	0.785924	4.9983			0.00042588	0.000134989	0.784079	4.98443
0.000601461	-0.000586438	0.784563	4.99946			0.000152789	-0.00118233	0.785855	4.99831			0.000394979	0.000157402	0.784056	4.98459
0.000585699	-0.000558541	0.784525	4.99947			0.000174879	-0.00116267	0.785787	4.99832			0.000363718	0.000179087	0.784034	4.98475
0.000569001	-0.000531053	0.784487	4.99948			0.000195174	-0.00114265	0.785721	4.99833			0.000332124	0.000200039	0.784013	4.9849
0.000551402	-0.000503989	0.78445	4.99949			0.000213711	-0.0011223	0.785656	4.99835			0.000300228	0.000220254	0.783992	4.98505
0.000532935	-0.000477367	0.784415	4.9995			0.000230527	-0.00110167	0.785592	4.99836			0.000268057	0.000239729	0.783973	4.98519
0.000513637	-0.000451201	0.78438	4.9995			0.00024566	-0.00108077	0.785529	4.99839			0.00023564	0.000258462	0.783954	4.98534
0.000493541	-0.000425505	0.784346	4.99951			0.000259146	-0.00105965	0.785468	4.99841			0.000203003	0.000276449	0.783935	4.98548
0.000472682	-0.000400293	0.784313	4.99952			0.000271023	-0.00103833	0.785407	4.99844			0.000170175	0.00029369	0.783917	4.98562
0.000451092	-0.000375579	0.784281	4.99953			0.000281327	-0.00101684	0.785348	4.99847			0.000137181	0.000310182	0.7839	4.98576
0.000428805	-0.000351374	0.784249	4.99953			0.000290096	-0.000995221	0.785291	4.9985			0.000104048	0.000325926	0.783884	4.9859
0.000405853	-0.00032769	0.784219	4.99954			0.000297365	-0.000973488	0.785234	4.99854			7.08013e-05	0.00034092	0.783868	4.98603
0.000382269	-0.000304539	0.78419	4.99955			0.000303173	-0.000951674	0.785179	4.99857			3.74661e-05	0.000355166	0.783853	4.98617
0.000358086	-0.000281931	0.784161	4.99956			0.000307555	-0.000929805	0.785124	4.9986			4.06705e-06	0.000368664	0.783839	4.9863
0.000333334	-0.000259875	0.784133	4.99956			0.000310549	-0.000907908	0.785071	4.99863			-2.93717e-05	0.000381415	0.783825	4.98644
0.000308044	-0.000238381	0.784106	4.99957			0.000312189	-0.000886008	0.785019	4.99866			-6.28265e-05	0.000393421	0.783812	4.98658
0.000282249	-0.000217458	0.78408	4.99958			0.000312514	-0.00086413	0.784969	4.99869			-9.62742e-05	0.000404684	0.7838	4.98671
0.000255978	-0.000197112	0.784055	4.99958			0.000311558	-0.000842298	0.784919	4.99871			-0.000129692	0.000415207	0.783788	4.98684
0.00022926	-0.000177353	0.784031	4.99959			0.000309358	-0.000820535	0.78487	4.99872			-0.000163058	0.000424992	0.783776	4.98698
0.000202126	-0.000158186	0.784007	4.9996			0.000305949	-0.000798863	0.784823	4.99874			-0.00019635	0.000434044	0.783765	4.98711
0.000174605	-0.000139618	0.783984	4.9996			0.000301367	-0.000777306	0.784777	4.99875			-0.000229547	0.000442365	0.783755	4.98724
0.000146726	-0.000121654	0.783962	4.99961			0.000295648	-0.000755883	0.784731	4.99876			-0.000262628	0.000449961	0.783746	4.98737
0.000118516	-0.0001043	0.78394	4.99962			0.000288825	-0.000734616	0.784687	4.99876			-0.000295574	0.000456835	0.783736	4.9875
9.00037e-05	-8.75591e-05	0.78392	4.99962			0.000280935	-0.000713524	0.784644	4.99877			-0.000328364	0.000462992	0.783728	4.98763
6.12162e-05	-7.14367e-05	0.7839	4.99963			0.000272011	-0.000692626	0.784602	4.99877			-0.000360979	0.000468439	0.78372	4.98775
3.21805e-05	-5.59359e-05	0.783881	4.99963			0.000262089	-0.000671941	0.784561	4.99878			-0.0003934	0.00047318	0.783712	4.98787
2.92307e-06	-4.10595e-05	0.783862	4.99964			0.000251202	-0.000651486	0.784521	4.99879			-0.00042561	0.000477221	0.783705	4.988
-2.65301e-05	-2.68102e-05	0.783844	4.99965			0.000239383	-0.000631279	0.784482	4.9988			-0.00045759	0.00048057	0.783699	4.98811
-5.61534e-05	-1.31899e-05	0.783827	4.99965			0.000226667	-0.000611336	0.784444	4.99881			-0.000489322	0.000483231	0.783693	4.98823
-8.59218e-05	-2.00104e-07	0.783811	4.99966			0.000213087	-0.000591672	0.784406	4.99883			-0.000520792	0.000485214	0.783687	4.98835
-0.000115811	1.21581e-05	0.783795	4.99966			0.000198676	-0.000572304	0.78437	4.99885			-0.000551981	0.000486524	0.783682	4.98846
-0.000145796	2.38843e-05	0.78378	4.99967			0.000183465	-0.000553245	0.784335	4.99887			-0.000582874	0.00048717	0.783678	4.98857
-0.000175853	3.49781e-05	0.783766	4.99967			0.000167488	-0.00053451	0.784301	4.99889			-0.000613456	0.000487158	0.783674	4.98868
-0.000205961	4.544e-05	0.783752	4.99968			0.000150777	-0.000516111	0.784268	4.99891			-0.000643711	0.000486498	0.78367	4.98879
-0.000236094	5.52707e-05	0.783739	4.99968			0.000133362	-0.000498062	0.784235	4.99894			-0.000673627	0.000485197	0.783667	4.9889
-0.000266232	6.44714e-05	0.783727	4.99969			0.000115276	-0.000480374	0.784204	4.99896			-0.000703187	0.000483264	0.783664	4.98901
-0.000296353	7.30435e-05	0.783715	4.99969			9.65495e-05	-0.00046306	0.784173	4.99899			-0.00073238	0.000480708	0.783662	4.98912
-0.000326435	8.09892e-05	0.783703	4.9997			7.72125e-05	-0.000446129	0.784143	4.99901			-0.000761192	0.000477538	0.78366	4.98922
-0.000356457	8.83107e-05	0.783693	4.9997			5.72955e-05	-0.000429593	0.784115	4.99903			-0.000789611	0.000473763	0.783659	4.98933
-0.000386399	9.50108e-05	0.783683	4.99971			3.68283e-05	-0.00041346	0.784087	4.99905			-0.000817624	0.000469393	0.783658	4.98944
-0.000416242	0.000101093	0.783673	4.99971			1.58403e-05	-0.000397741	0.784059	4.99906			-0.00084522	0.000464437	0.783657	4.98954
-0.000445965	0.00010656	0.783664	4.99972			-5.63936e-06	-0.000382444	0.784033	4.99908			-0.000872388	0.000458905	0.783657	4.98965
-0.000475549	0.000111416	0.783656	4.99972			-2.75821e-05	-0.000367576	0.784008	4.99909			-0.000899117	0.000452807	0.783657	4.98976
-0.000504977	0.000115665	0.783648	4.99972			-4.99595e-05	-0.000353146	0.783983	4.99909			-0.000925396	0.000446154	0.783657	4.98986
-0.00053423	0.000119311	0.783641	4.99973			-7.27439e-05	-0.000339161	0.783959	4.9991			-0.000951217	0.000438955	0.783658	4.98996
-0.000563291	0.000122361	0.783634	4.99973			-9.59077e-05	-0.000325628	0.783936	4.9991			-0.00097657	0.000431222	0.783659	4.99007
-0.000592143	0.000124817	0.783628	4.99974			-0.000119424	-0.000312551	0.783914	4.9991			-0.00100144	0.000422964	0.783661	4.99017
-0.000620768	0.000126687	0.783622	4.99974			-0.000143266	-0.000299937	0.783892	4.99911			-0.00102583	0.000414193	0.783663	4.99026
-0.000649151	0.000127976	0.783617	4.99975			-0.000167407	-0.000287791	0.783872	4.99911			-0.00104973	0.00040492	0.783665	4.99036
-0.000677277	0.000128689	0.783612	4.99975			-0.000191823	-0.000276118	0.783852	4.99912			-0.00107312	0.000395155	0.783668	4.99046
-0.000705129	0.000128833	0.783608	4.99975			-0.000216486	-0.000264921	0.783832	4.99913			-0.00109601	0.00038491	0.78367	4.99055
-0.000732694	0.000128414	0.783604	4.99976			-0.000241373	-0.000254204	0.783814	4.99914			-0.00111838	0.000374196	0.783674	4.99064
-0.000759957	0.00012744	0.7836	4.99976			-0.000266459	-0.000243971	0.783796	4.99915			-0.00114023	0.000363025	0.783677	4.99074
-0.000786904	0.000125917	0.783598	4.99977			-0.00029172	-0.000234224	0.783779	4.99916			-0.00116155	0.000351407	0.783681	4.99083
-0.000813522	0.000123852	0.783595	4.99977			-0.000317132	-0.000224965	0.783763	4.99918			-0.00118233	0.000339354	0.783685	4.99092
-0.000839798	0.000121253	0.783593	4.99977			-0.000342672	-0.000216197	0.783747	4.99919			-0.00120258	0.000326878	0.783689	4.991
-0.000865719	0.000118128	0.783591	4.99978			-0.000368317	-0.000207921	0.783732	4.99921			-0.00122228	0.000313991	0.783694	4.99109
-0.000891274	0.000114485	0.78359	4.99978			-0.000394045	-0.000200137	0.783718	4.99923			-0.00124144	0.000300704	0.783699	4.99118
-0.00091645	0.000110331	0.78359	4.99978			-0.000419834	-0.000192848	0.783704	4.99925			-0.00126004	0.000287028	0.783704	4.99126
-0.000941238	0.000105675	0.783589	4.99979			-0.000445663	-0.000186052	0.783691	4.99927			-0.00127809	0.000272976	0.78371	4.99135
-0.000965625	0.000100525	0.783589	4.99979			-0.00047151	-0.00017975	0.783678	4.99928			-0.00129558	0.00025856	0.783715	4.99144
-0.000989603	9.48907e-05	0.78359	4.99979			-0.000497356	-0.000173941	0.783667	4.9993			-0.0013125	0.000243791	0.783721	4.99152
-0.00101316	8.87799e-05	0.783591	4.9998			-0.000523179	-0.000168624	0.783655	4.99931			-0.00132886	0.000228681	0.783728	4.99161
-0.00103629	8.22019e-05	0.783592	4.9998			-0.000548961	-0.0001638	0.783645	4.99932			-0.00134466	0.000213241	0.783734	4.99169
-0.00105898	7.51658e-05	0.783593	4.9998			-0.000574682	-0.000159464	0.783635	4.99933			-0.00135988	0.000197485	0.783741	4.99177
-0.00108122	6.76807e-05	0.783595	4.99981			-0.000600324	-0.000155617	0.783625	4.99934			-0.00137454	0.000181423	0.783748	4.99186
-0.00110301	5.97562e-05	0.783598	4.99981			-0.000625867	-0.000152256	0.783616	4.99934			-0.00138862	0.000165067	0.783755	4.99194
-0.00112433	5.14016e-05	0.7836	4.99981			-0.000651295	-0.000149378	0.783608	4.99935			-0.00140213	0.00014843	0.783762	4.99202
-0.00114519	4.26265e-05	0.783603	4.99982			-0.00067659	-0.00014698	0.7836	4.99935			-0.00141507	0.000131523	0.78377	4.9921
-0.00116556	3.34408e-05	0.783606	4.99982			-0.000701735	-0.00014506	0.783593	4.99935			-0.00142743	0.000114357	0.783777	4.99218
-0.00118546	2.38541e-05	0.78361	4.99982			-0.000726713	-0.000143614	0.783587	4.99935			-0.00143922	9.69455e-05	0.783785	4.99226
-0.00120486	1.38764e-05	0.783614	4.99982			-0.000751509	-0.000142638	0.78358	4.99935			-0.00145043	7.92991e-05	0.783793	4.99234
-0.00122377	3.51769e-06	0.783618	4.99983			-0.000776106	-0.000142128	0.783575	4.99936			-0.00146108	6.14297e-05	0.783802	4.99242
-0.00124218	-7.212e-06	0.783623	4.99983			-0.00080049	-0.000142081	0.78357	4.99936			-0.00147115	4.33488e-05	0.78381	4.99249
-0.00126008	-1.83025e-05	0.783627	4.99983			-0.000824646	-0.000142491	0.783565	4.99937			-0.00148065	2.50681e-05	0.783819	4.99256
-0.00127747	-2.97437e-05	0.783633	4.99983			-0.000848559	-0.000143354	0.783561	4.99938			-0.00148958	6.59913e-06	0.783827	4.99264
-0.00129435	-4.15253e-05	0.783638	4.99984			-0.000872216	-0.000144665	0.783557	4.99939			-0.00149795	-1.20468e-05	0.783836	4.99271
-0.00131071	-5.36369e-05	0.783644	4.99984			-0.000895603	-0.000146419	0.783554	4.9994			-0.00150575	-3.08582e-05	0.783846	4.99278
-0.00132654	-6.60684e-05	0.783649	4.99984			-0.000918707	-0.00014861	0.783551	4.99942			-0.00151298	-4.98238e-05	0.783855	4.99285
-0.00134185	-7.88092e-05	0.783656	4.99984			-0.000941517	-0.000151233	0.783549	4.99943			-0.00151966	-6.89325e-05	0.783864	4.99292
-0.00135663	-9.1849e-05	0.783662	4.99985			-0.000964018	-0.000154282	0.783547	4.99944			-0.00152578	-8.8173e-05	0.783874	4.99299
-0.00137089	-0.000105177	0.783669	4.99985			-0.000986201	-0.000157751	0.783546	4.99946			-0.00153134	-0.000107534	0.783883	4.99306
-0.0013846	-0.000118784	0.783676	4.99985			-0.00100805	-0.000161633	0.783545	4.99947			-0.00153636	-0.000127006	0.783893	4.99313
-0.00139779	-0.000132658	0.783683	4.99985			-0.00102956	-0.000165923	0.783545	4.99948			-0.00154082	-0.000146576	0.783903	4.99319
-0.00141044	-0.000146789	0.78369	4.99986			-0.00105072	-0.000170613	0.783544	4.99949			-0.00154474	-0.000166234	0.783913	4.99326
-0.00142255	-0.000161168	0.783698	4.99986			-0.00107152	-0.000175698	0.783545	4.9995			-0.00154813	-0.000185971	0.783923	4.99333
-0.00143412	-0.000175782	0.783705	4.99986			-0.00109194	-0.000181169	0.783545	4.99951			-0.00155097	-0.000205774	0.783934	4.9934
-0.00144515	-0.000190623	0.783713	4.99986			-0.00111199	-0.00018702	0.783546	4.99952			-0.00155329	-0.000225634	0.783944	4.99346
-0.00145565	-0.000205679	0.783722	4.99987			-0.00113164	-0.000193244	0.783548	4.99952			-0.00155507	-0.00024554	0.783955	4.99353
-0.0014656	-0.00022094	0.78373	4.99987			-0.0011509	-0.000199834	0.78355	4.99952			-0.00155634	-0.000265482	0.783965	4.9936
-0.00147502	-0.000236395	0.783739	4.99987			-0.00116975	-0.000206781	0.783552	4.99952			-0.00155709	-0.00028545	0.783976	4.99366
-0.0014839	-0.000252036	0.783747	4.99987			-0.00118819	-0.000214079	0.783554	4.99953			-0.00155732	-0.000305435	0.783987	4.99372
-0.00149224	-0.00026785	0.783756	4.99987			-0.00120621	-0.000221719	0.783557	4.99953			-0.00155705	-0.000325425	0.783998	4.99379
-0.00150005	-0.000283828	0.783765	4.99988			-0.0012238	-0.000229694	0.783561	4.99953			-0.00155628	-0.000345412	0.784008	4.99385
-0.00150732	-0.00029996	0.783775	4.99988			-0.00124095	-0.000237996	0.783564	4.99953			-0.00155501	-0.000365387	0.784019	4.99391
-0.00151405	-0.000316236	0.783784	4.99988			-0.00125766	-0.000246617	0.783568	4.99953			-0.00155325	-0.000385338	0.784031	4.99397
-0.00152026	-0.000332645	0.783794	4.99988			-0.00127393	-0.000255549	0.783572	4.99954			-0.00155101	-0.000405258	0.784042	4.99403
-0.00152594	-0.000349178	0.783803	4.99988			-0.00128975	-0.000264783	0.783577	4.99954			-0.0015483	-0.000425137	0.784053	4.99409
-0.00153109	-0.000365825	0.783813	4.99989			-0.0013051	-0.000274311	0.783581	4.99955			-0.00154511	-0.000444967	0.784064	4.99415
-0.00153572	-0.000382575	0.783823	4.99989			-0.00132	-0.000284126	0.783587	4.99956			-0.00154145	-0.000464737	0.784076	4.9942
-0.00153983	-0.000399419	0.783834	4.99989			-0.00133443	-0.000294218	0.783592	4.99957			-0.00153734	-0.00048444	0.784087	4.99426
-0.00154342	-0.000416348	0.783844	4.99989			-0.0013484	-0.000304579	0.783598	4.99958			-0.00153277	-0.000504067	0.784098	4.99432
-0.0015465	-0.000433351	0.783854	4.99989			-0.00136188	-0.000315201	0.783603	4.99959			-0.00152777	-0.00052361	0.78411	4.99437
-0.00154906	-0.000450419	0.783865	4.99989			-0.0013749	-0.000326075	0.78361	4.9996			-0.00152232	-0.00054306	0.784121	4.99443
-0.00155112	-0.000467542	0.783876	4.9999			-0.00138743	-0.000337193	0.783616	4.99961			-0.00151644	-0.000562409	0.784133	4.99448
-0.00155268	-0.000484713	0.783886	4.9999			-0.00139948	-0.000348546	0.783623	4.99962			-0.00151014	-0.00058165	0.784145	4.99454
-0.00155374	-0.00050192	0.783897	4.9999			-0.00141104	-0.000360124	0.78363	4.99963			-0.00150342	-0.000600774	0.784156	4.99459
-0.0015543	-0.000519155	0.783908	4.9999			-0.00142212	-0.000371921	0.783637	4.99963			-0.00149629	-0.000619774	0.784168	4.99464
-0.00155438	-0.000536409	0.783919	4.9999			-0.00143271	-0.000383926	0.783644	4.99964			-0.00148877	-0.000638642	0.78418	4.9947
-0.00155397	-0.000553672	0.78393	4.9999			-0.00144281	-0.000396132	0.783652	4.99965			-0.00148084	-0.000657371	0.784191	4.99475
-0.00155308	-0.000570937	0.783942	4.99991			-0.00145242	-0.000408529	0.78366	4.99965			-0.00147253	-0.000675954	0.784203	4.9948
-0.00155172	-0.000588195	0.783953	4.99991			-0.00146154	-0.000421109	0.783668	4.99965			-0.00146384	-0.000694384	0.784215	4.99486
-0.00154988	-0.000605436	0.783965	4.99991			-0.00147016	-0.000433864	0.783676	4.99965			-0.00145478	-0.000712655	0.784227	4.99491
-0.00154758	-0.000622652	0.783976	4.99991			-0.0014783	-0.000446784	0.783685	4.99966			-0.00144536	-0.000730758	0.784239	4.99496
-0.00154483	-0.000639835	0.783988	4.99991			-0.00148594	-0.00045986	0.783694	4.99966			-0.00143558	-0.000748689	0.78425	4.99501
-0.00154162	-0.000656977	0.783999	4.99991			-0.00149308	-0.000473085	0.783702	4.99966			-0.00142545	-0.00076644	0.784262	4.99506
-0.00153796	-0.00067407	0.784011	4.99991			-0.00149974	-0.00048645	0.783712	4.99966			-0.00141499	-0.000784006	0.784274	4.99511
-0.00153387	-0.000691105	0.784023	4.99992			-0.00150591	-0.000499946	0.783721	4.99966			-0.00140419	-0.00080138	0.784286	4.99516
-0.00152934	-0.000708076	0.784035	4.99992			-0.00151158	-0.000513564	0.78373	4.99966			-0.00139306	-0.000818557	0.784298	4.99521
-0.00152438	-0.000724973	0.784046	4.99992			-0.00151677	-0.000527296	0.78374	4.99966			-0.00138163	-0.000835531	0.78431	4.99526
-0.001519	-0.000741789	0.784058	4.99992			-0.00152147	-0.000541134	0.78375	4.99967			-0.00136988	-0.000852297	0.784321	4.9953
-0.0015132	-0.000758518	0.78407	4.99992			-0.00152569	-0.000555068	0.78376	4.99967			-0.00135783	-0.000868848	0.784333	4.99535
-0.001507	-0.000775151	0.784082	4.99992			-0.00152942	-0.000569092	0.78377	4.99968			-0.0013455	-0.000885181	0.784345	4.99539
-0.00150039	-0.000791682	0.784094	4.99992			-0.00153267	-0.000583196	0.78378	4.99969			-0.00133288	-0.00090129	0.784357	4.99544
-0.00149339	-0.000808104	0.784107	4.99992			-0.00153545	-0.000597372	0.78379	4.99969			-0.00131998	-0.00091717	0.784368	4.99548
-0.001486	-0.000824409	0.784119	4.99993			-0.00153775	-0.000611611	0.783801	4.9997			-0.00130682	-0.000932816	0.78438	4.99553
-0.00147822	-0.000840591	0.784131	4.99993			-0.00153958	-0.000625907	0.783811	4.99971			-0.0012934	-0.000948225	0.784392	4.99557
-0.00147008	-0.000856643	0.784143	4.99993			-0.00154094	-0.00064025	0.783822	4.99972			-0.00127973	-0.000963391	0.784404	4.99561
-0.00146157	-0.00087256	0.784155	4.99993			-0.00154183	-0.000654633	0.783833	4.99972			-0.00126582	-0.000978311	0.784415	4.99566
-0.00145269	-0.000888333	0.784167	4.99993			-0.00154226	-0.000669048	0.783844	4.99973			-0.00125167	-0.00099298	0.784427	4.9957
-0.00144347	-0.000903958	0.78418	4.99993			-0.00154223	-0.000683487	0.783855	4.99974			-0.00123729	-0.0010074	0.784439	4.99574
-0.0014339	-0.000919429	0.784192	4.99993			-0.00154175	-0.000697942	0.783866	4.99974			-0.0012227	-0.00102155	0.78445	4.99579
-0.00142399	-0.000934739	0.784204	4.99993			-0.00154082	-0.000712405	0.783878	4.99974			-0.0012079	-0.00103545	0.784462	4.99583
-0.00141375	-0.000949882	0.784217	4.99993			-0.00153944	-0.000726869	0.783889	4.99975			-0.0011929	-0.00104908	0.784473	4.99587
-0.00140319	-0.000964854	0.784229	4.99994			-0.00153762	-0.000741327	0.7839	4.99975			-0.00117771	-0.00106244	0.784485	4.99591
-0.00139231	-0.000979649	0.784241	4.99994			-0.00153537	-0.000755771	0.783912	4.99975			-0.00116233	-0.00107553	0.784496	4.99595
-0.00138113	-0.000994261	0.784253	4.99994			-0.00153268	-0.000770193	0.783924	4.99975			-0.00114677	-0.00108835	0.784508	4.996
-0.00136964	-0.00100869	0.784266	4.99994			-0.00152956	-0.000784587	0.783935	4.99975			-0.00113104	-0.00110089	0.784519	4.99604
-0.00135787	-0.00102292	0.784278	4.99994			-0.00152602	-0.000798945	0.783947	4.99975			-0.00111515	-0.00111316	0.78453	4.99608
-0.00134581	-0.00103695	0.78429	4.99994			-0.00152207	-0.000813261	0.783959	4.99975			-0.00109911	-0.00112514	0.784542	4.99611
-0.00133347	-0.00105078	0.784302	4.99994			-0.0015177	-0.000827526	0.783971	4.99975			-0.00108293	-0.00113683	0.784553	4.99615
-0.00132087	-0.00106441	0.784315	4.99994			-0.00151293	-0.000841736	0.783983	4.99975			-0.0010666	-0.00114825	0.784564	4.99619
-0.001308	-0.00107782	0.784327	4.99994			-0.00150776	-0.000855882	0.783995	4.99976			-0.00105015	-0.00115937	0.784575	4.99623
-0.00129488	-0.00109102	0.784339	4.99994			-0.00150219	-0.000869959	0.784007	4.99976			-0.00103357	-0.0011702	0.784586	4.99627
-0.00128152	-0.001104	0.784351	4.99994			-0.00149624	-0.000883959	0.78402	4.99976			-0.00101688	-0.00118075	0.784597	4.9963
-0.00126792	-0.00111676	0.784363	4.99995			-0.0014899	-0.000897877	0.784032	4.99977			-0.00100008	-0.001191	0.784608	4.99634
-0.00125408	-0.00112929	0.784376	4.99995			-0.00148319	-0.000911706	0.784044	4.99977			-0.000983188	-0.00120095	0.784619	4.99637
-0.00124003	-0.00114159	0.784388	4.99995			-0.0014761	-0.00092544	0.784057	4.99978			-0.0009662	-0.00121061	0.78463	4.99641
-0.00122576	-0.00115366	0.7844	4.99995			-0.00146865	-0.000939073	0.784069	4.99978			-0.000949128	-0.00121997	0.784641	4.99645
-0.00121129	-0.00116548	0.784412	4.99995			-0.00146085	-0.000952599	0.784081	4.99979			-0.000931979	-0.00122904	0.784652	4.99648
-0.00119662	-0.00117707	0.784424	4.99995			-0.00145269	-0.000966013	0.784094	4.99979			-0.000914761	-0.00123781	0.784663	4.99651
-0.00118175	-0.00118842	0.784436	4.99995			-0.00144419	-0.000979308	0.784106	4.9998			-0.000897481	-0.00124628	0.784673	4.99655
-0.00116671	-0.00119951	0.784448	4.99995			-0.00143534	-0.00099248	0.784119	4.9998			-0.000880145	-0.00125445	0.784684	4.99658
-0.00115148	-0.00121036	0.78446	4.99995			-0.00142617	-0.00100552	0.784131	4.99981			-0.000862761	-0.00126232	0.784694	4.99662
-0.00113609	-0.00122096	0.784472	4.99995			-0.00141668	-0.00101843	0.784144	4.99981			-0.000845337	-0.00126989	0.784705	4.99665
-0.00112055	-0.0012313	0.784483	4.99995			-0.00140686	-0.0010312	0.784156	4.99981			-0.000827878	-0.00127716	0.784715	4.99669
-0.00110484	-0.00124139	0.784495	4.99995			-0.00139674	-0.00104382	0.784169	4.99982			-0.000810392	-0.00128413	0.784726	4.99672
-0.001089	-0.00125122	0.784507	4.99996			-0.00138631	-0.00105629	0.784182	4.99982			-0.000792885	-0.0012908	0.784736	4.99675
-0.00107301	-0.00126078	0.784519	4.99996			-0.00137558	-0.00106861	0.784194	4.99982			-0.000775365	-0.00129717	0.784746	4.99678
-0.0010569	-0.00127009	0.78453	4.99996			-0.00136457	-0.00108077	0.784207	4.99982			-0.000757837	-0.00130324	0.784756	4.99682
-0.00104067	-0.00127913	0.784542	4.99996			-0.00135327	-0.00109277	0.784219	4.99982			-0.000740309	-0.00130901	0.784766	4.99685
-0.00102432	-0.0012879	0.784553	4.99996			-0.00134169	-0.0011046	0.784232	4.99982			-0.000722786	-0.00131448	0.784776	4.99688
-0.00100786	-0.00129641	0.784565	4.99996			-0.00132985	-0.00111626	0.784244	4.99982			-0.000705275	-0.00131966	0.784786	4.99691
-0.000991302	-0.00130464	0.784576	4.99996			-0.00131775	-0.00112773	0.784257	4.99982			-0.000687782	-0.00132454	0.784796	4.99694
-0.000974651	-0.00131261	0.784588	4.99996			-0.00130539	-0.00113903	0.78427	4.99982			-0.000670313	-0.00132912	0.784806	4.99697
-0.000957916	-0.00132031	0.784599	4.99996			-0.00129279	-0.00115015	0.784282	4.99982			-0.000652875	-0.00133341	0.784816	4.997
-0.000941101	-0.00132773	0.78461	4.99996			-0.00127994	-0.00116108	0.784295	4.99982			-0.000635473	-0.00133741	0.784825	4.99703
-0.000924215	-0.00133488	0.784621	4.99996			-0.00126687	-0.00117181	0.784307	4.99983			-0.000618113	-0.00134111	0.784835	4.99706
-0.000907265	-0.00134176	0.784633	4.99996			-0.00125357	-0.00118235	0.78432	4.99983			-0.000600801	-0.00134452	0.784844	4.99709
-0.000890258	-0.00134836	0.784644	4.99996			-0.00124005	-0.00119269	0.784332	4.99983			-0.000583542	-0.00134764	0.784854	4.99712
-0.000873199	-0.00135469	0.784655	4.99996			-0.00122632	-0.00120283	0.784345	4.99984			-0.000566342	-0.00135048	0.784863	4.99715
-0.000856097	-0.00136075	0.784666	4.99996			-0.00121239	-0.00121277	0.784357	4.99984			-0.000549206	-0.00135303	0.784873	4.99717
-0.000838958	-0.00136653	0.784677	4.99996			-0.00119826	-0.00122249	0.784369	4.99985			-0.00053214	-0.00135529	0.784882	4.9972
-0.000821788	-0.00137203	0.784687	4.99997			-0.00118394	-0.00123201	0.784382	4.99985			-0.000515149	-0.00135727	0.784891	4.99723
-0.000804594	-0.00137726	0.784698	4.99997			-0.00116944	-0.00124131	0.784394	4.99986			-0.000498238	-0.00135897	0.7849	4.99726
-0.000787383	-0.00138221	0.784709	4.99997			-0.00115477	-0.0012504	0.784406	4.99986			-0.000481412	-0.00136039	0.784909	4.99728
-0.000770161	-0.00138689	0.784719	4.99997			-0.00113993	-0.00125927	0.784419	4.99986			-0.000464675	-0.00136154	0.784918	4.99731
-0.000752934	-0.00139129	0.78473	4.99997			-0.00112494	-0.00126791	0.784431	4.99986			-0.000448034	-0.00136241	0.784927	4.99734
-0.000735709	-0.00139543	0.78474	4.99997			-0.00110979	-0.00127634	0.784443	4.99987			-0.000431492	-0.001363	0.784935	4.99737
-0.000718491	-0.00139928	0.784751	4.99997			-0.00109449	-0.00128453	0.784455	4.99987			-0.000415053	-0.00136333	0.784944	4.99739
-0.000701288	-0.00140287	0.784761	4.99997			-0.00107906	-0.00129251	0.784467	4.99987			-0.000398724	-0.00136339	0.784953	4.99742
-0.000684103	-0.00140618	0.784771	4.99997			-0.00106349	-0.00130025	0.784479	4.99987			-0.000382507	-0.00136319	0.784961	4.99744
-0.000666945	-0.00140922	0.784782	4.99997			-0.00104781	-0.00130776	0.784491	4.99987			-0.000366407	-0.00136272	0.78497	4.99747
-0.000649818	-0.00141199	0.784792	4.99997			-0.001032	-0.00131504	0.784503	4.99987			-0.000350428	-0.001362	0.784978	4.9975
-0.000632728	-0.00141449	0.784802	4.99997			-0.00101609	-0.00132208	0.784515	4.99987			-0.000334574	-0.00136102	0.784986	4.99752
-0.000615681	-0.00141673	0.784812	4.99997			-0.00100007	-0.00132889	0.784527	4.99987			-0.00031885	-0.00135978	0.784994	4.99755
-0.000598681	-0.0014187	0.784822	4.99997			-0.000983955	-0.00133547	0.784539	4.99987			-0.000303259	-0.00135829	0.785002	4.99757
-0.000581736	-0.0014204	0.784831	4.99997			-0.000967752	-0.0013418	0.784551	4.99987			-0.000287804	-0.00135655	0.785011	4.99759
-0.000564849	-0.00142184	0.784841	4.99997			-0.000951467	-0.0013479	0.784562	4.99987			-0.00027249	-0.00135457	0.785018	4.99762
-0.000548027	-0.00142301	0.784851	4.99997			-0.000935107	-0.00135375	0.784574	4.99987			-0.000257319	-0.00135235	0.785026	4.99764
-0.000531274	-0.00142393	0.78486	4.99997			-0.000918677	-0.00135937	0.784586	4.99987			-0.000242296	-0.00134988	0.785034	4.99766
-0.000514595	-0.00142459	0.78487	4.99997			-0.000902185	-0.00136474	0.784597	4.99988			-0.000227423	-0.00134718	0.785042	4.99769
-0.000497996	-0.00142499	0.784879	4.99997			-0.000885637	-0.00136988	0.784609	4.99988			-0.000212704	-0.00134425	0.785049	4.99771
-0.00048148	-0.00142514	0.784889	4.99997			-0.00086904	-0.00137477	0.78462	4.99988			-0.000198141	-0.00134109	0.785057	4.99773
-0.000465053	-0.00142503	0.784898	4.99998			-0.0008524	-0.00137942	0.784631	4.99989			-0.000183739	-0.0013377	0.785065	4.99775
-0.00044872	-0.00142467	0.784907	4.99998			-0.000835724	-0.00138382	0.784642	4.99989			-0.000169498	-0.00133408	0.785072	4.99778
-0.000432484	-0.00142407	0.784916	4.99998			-0.000819018	-0.00138798	0.784654	4.99989			-0.000155424	-0.00133025	0.785079	4.9978
-0.000416351	-0.00142321	0.784925	4.99998			-0.000802288	-0.0013919	0.784665	4.9999			-0.000141517	-0.0013262	0.785086	4.99782
-0.000400325	-0.00142212	0.784934	4.99998			-0.00078554	-0.00139558	0.784676	4.9999			-0.00012778	-0.00132194	0.785094	4.99784
-0.000384409	-0.00142078	0.784943	4.99998			-0.00076878	-0.00139901	0.784687	4.9999			-0.000114217	-0.00131747	0.785101	4.99786
-0.000368601	-0.00141921	0.784952	5.00002			-0.000752014	-0.00140222	0.784698	4.99995			-0.000100818	-0.0013128	0.785108	4.99793
-0.000352876	-0.00141747	0.784961	5.00031			-0.000735244	-0.00140525	0.784709	5.00023			-8.75454e-05	-0.00130799	0.785115	4.99824
-0.000337209	-0.00141561	0.784969	5.00101			-0.000718471	-0.00140815	0.784719	5.00094			-7.43551e-05	-0.00130759	0.785116	4.99896
-0.000321585	-0.00141366	0.784978	5.00225			-0.000701696	-0.00141097	0.78473	5.00218			-0.000124277	-0.00133743	0.785043	5.00022
-0.000305992	-0.00141164	0.784986	5.00413			-0.000684919	-0.00141372	0.784741	5.00405			-0.000231417	-0.00138861	0.784895	5.00212
-0.000291904	-0.0014127	0.784993	5.0067			-0.000719661	-0.00147527	0.784734	5.00663			-0.000391459	-0.00145941	0.784679	5.00471
-0.000340794	-0.00147896	0.784982	5.00999			-0.000866066	-0.00165268	0.784692	5.00996			-0.000598869	-0.00154773	0.7844	5.00806
-0.000451626	-0.00161167	0.784951	5.01398			-0.0011344	-0.00195436	0.784613	5.01407			-0.000847774	-0.00165137	0.784067	5.01201
-0.000635165	-0.00182035	0.784899	5.01864			-0.00152323	-0.00237717	0.784499	5.01894			-0.00113247	-0.0017682	0.783687	5.01633
-0.000886789	-0.00210006	0.784826	5.02391			-0.00202239	-0.00291064	0.784352	5.02438			-0.00144769	-0.00189629	0.783268	5.02075
-0.00119989	-0.00244382	0.784736	5.02968			-0.00261973	-0.00354244	0.784176	5.03013			-0.0017887	-0.00203389	0.782815	5.02499
-0.00156715	-0.00284399	0.78463	5.03574			-0.00330268	-0.00425991	0.783976	5.03592			-0.00215138	-0.00217949	0.782334	5.02882
-0.00198134	-0.003293	0.784511	5.04179			-0.00405922	-0.005051	0.783754	5.04149			-0.00253217	-0.00233177	0.781829	5.03202
-0.00243566	-0.00378378	0.784381	5.04759			-0.00487838	-0.00590468	0.783515	5.04659			-0.00292801	-0.00248962	0.781304	5.03438
-0.00292399	-0.00430995	0.78424	5.05289			-0.00575035	-0.00681119	0.783261	5.05103			-0.00333635	-0.00265209	0.780764	5.03576
-0.00344093	-0.0048659	0.784092	5.05749			-0.00666662	-0.00776199	0.782994	5.0546			-0.00375503	-0.0028184	0.780209	5.03601
-0.00398181	-0.00544677	0.783937	5.06121			-0.00761987	-0.00874976	0.782718	5.05714			-0.00418224	-0.00298787	0.779644	5.035
-0.00454265	-0.0060484	0.783777	5.06389			-0.00860385	-0.00976827	0.782434	5.05854			-0.00461648	-0.00315996	0.77907	5.03265
-0.00512004	-0.00666727	0.783613	5.0654			-0.00961331	-0.0108123	0.782143	5.05866			-0.00505651	-0.0033342	0.778488	5.02886
-0.00571115	-0.00730041	0.783444	5.06562			-0.0106438	-0.0118773	0.781848	5.05741			-0.00550131	-0.00351023	0.7779	5.02358
-0.00631359	-0.00794535	0.783273	5.06447			-0.0116918	-0.0129598	0.781548	5.05472			-0.00595001	-0.00368771	0.777307	5.01673
-0.00692537	-0.00860003	0.7831	5.06186			-0.012754	-0.0140566	0.781246	5.05051			-0.00640193	-0.0038664	0.77671	5.00828
-0.00754485	-0.00926272	0.782925	5.05773			-0.0138281	-0.0151652	0.780941	5.04474			-0.00685647	-0.00404607	0.776109	4.99818
-0.00817067	-0.009932	0.782749	5.05203			-0.0149119	-0.0162836	0.780635	5.03735			-0.00731318	-0.00422656	0.775506	4.98641
-0.0088017	-0.0106067	0.782571	5.04472			-0.0160037	-0.0174098	0.780328	5.0283			-0.00777166	-0.00440771	0.774901	4.97293
-0.009437	-0.0112859	0.782393	5.03575			-0.0171021	-0.0185427	0.78002	5.01758			-0.00823159	-0.00458941	0.774293	4.95772
-0.0100758	-0.0119687	0.782214	5.0251			-0.0182058	-0.0196809	0.779712	5.00515			-0.0086927	-0.00477156	0.773685	4.94077
-0.0107175	-0.0126545	0.782035	5.01274			-0.019314	-0.0208235	0.779404	4.99099			-0.00915479	-0.00495408	0.773075	4.92207
-0.0113616	-0.0133428	0.781855	4.99865			-0.0204258	-0.0219697	0.779096	4.97508			-0.00961767	-0.0051369	0.772464	4.90159
-0.0120076	-0.0140331	0.781676	4.98282			-0.0215407	-0.0231188	0.778789	4.95741			-0.0100812	-0.00531997	0.771852	4.87933
-0.0126552	-0.014725	0.781496	4.96538			-0.0226579	-0.0242703	0.778482	4.93812			-0.0105453	-0.00550324	0.77124	4.85544
-0.0133039	-0.015418	0.781317	4.94694			-0.0237769	-0.0254235	0.778176	4.91781			-0.0110097	-0.00568665	0.770627	4.83052
-0.0139533	-0.0161119	0.781137	4.92803			-0.0248971	-0.0265778	0.777871	4.89704			-0.0114744	-0.00587016	0.770014	4.80512
-0.0146033	-0.0168063	0.780959	4.90905			-0.0260182	-0.0277329	0.777567	4.87618			-0.0119392	-0.00605374	0.769401	4.77963
-0.0152538	-0.0175011	0.78078	4.89026			-0.02714	-0.0288886	0.777264	4.85551			-0.0124042	-0.00623737	0.768788	4.75432
-0.0159045	-0.0181962	0.780602	4.87184			-0.0282622	-0.0300447	0.776962	4.83521			-0.0128693	-0.00642103	0.768174	4.72939
-0.0165554	-0.0188915	0.780424	4.85395			-0.0293848	-0.031201	0.776661	4.81543			-0.0133344	-0.00660471	0.767561	4.70497
-0.0172065	-0.0195869	0.780247	4.83667			-0.0305077	-0.0323575	0.776362	4.79626			-0.0137996	-0.00678842	0.766948	4.68116
-0.0178577	-0.0202824	0.78007	4.82008			-0.0316309	-0.0335142	0.776064	4.77778			-0.0142648	-0.00697214	0.766335	4.65803
-0.018509	-0.020978	0.779893	4.80423			-0.0327542	-0.0346709	0.775767	4.76004			-0.0147341	-0.0071601	0.765721	4.63565
-0.0191603	-0.0216737	0.779717	4.78911			-0.0338777	-0.0358277	0.775472	4.74303			-0.0152419	-0.00738156	0.7651	4.61399
-0.0198118	-0.0223694	0.779541	4.77453			-0.0350014	-0.0369845	0.775177	4.72655			-0.0157974	-0.00764488	0.76447	4.59287
-0.0204633	-0.0230652	0.779366	4.7602			-0.0361253	-0.0381414	0.774884	4.71032			-0.0164012	-0.00795079	0.763831	4.572
-0.021115	-0.0237611	0.779191	4.7459			-0.0372494	-0.0392984	0.774592	4.69408			-0.0170512	-0.00829717	0.763183	4.55111
-0.0217667	-0.024457	0.779017	4.73178			-0.0383737	-0.0404554	0.774302	4.67756			-0.0177432	-0.00868043	0.762527	4.52994
-0.0224185	-0.025153	0.778843	4.71799			-0.0394982	-0.0416125	0.774012	4.66052			-0.0184724	-0.00909639	0.761864	4.50825
-0.0230703	-0.025849	0.77867	4.70468			-0.0406228	-0.0427696	0.773724	4.64278			-0.0192341	-0.00954081	0.761195	4.48587
-0.0237285	-0.0265483	0.778495	4.69196			-0.0417476	-0.0439267	0.773437	4.62458			-0.0200236	-0.0100097	0.760522	4.46308
-0.024419	-0.0272644	0.778312	4.6799			-0.0428726	-0.0450838	0.773152	4.60624			-0.0208368	-0.0104993	0.759844	4.4402
-0.0251643	-0.0280086	0.778116	4.66858			-0.0440016	-0.0462418	0.772865	4.58805			-0.02167	-0.0110064	0.759162	4.4175
-0.0259741	-0.0287856	0.777902	4.65797			-0.0451515	-0.0474034	0.772571	4.57013			-0.0225198	-0.0115281	0.758478	4.39509
-0.026844	-0.0295931	0.777673	4.64789			-0.0463225	-0.0485687	0.772269	4.55229			-0.0233836	-0.0120621	0.757792	4.37278
-0.0277666	-0.0304273	0.77743	4.63806			-0.0475112	-0.0497371	0.771961	4.53426			-0.024259	-0.0126063	0.757104	4.35031
-0.0287345	-0.0312845	0.777176	4.62829			-0.0487146	-0.0509081	0.771648	4.5158			-0.0251439	-0.0131589	0.756414	4.32743
-0.0297409	-0.0321613	0.776912	4.61867			-0.0499303	-0.0520813	0.771331	4.49669			-0.0260368	-0.0137185	0.755724	4.30391
-0.0307768	-0.0330471	0.776642	4.60935			-0.0511561	-0.0532562	0.771012	4.4768			-0.0269363	-0.0142838	0.755032	4.27973
-0.0318221	-0.033909	0.776368	4.60049			-0.0523649	-0.0543794	0.770692	4.4565			-0.0278383	-0.0148458	0.754346	4.25527
-0.0328652	-0.0347322	0.776092	4.59219			-0.0535376	-0.0554149	0.770372	4.43611			-0.0287291	-0.0153556	0.753665	4.23084
-0.0339072	-0.0355276	0.775811	4.58455			-0.0546594	-0.0563356	0.770051	4.41591			-0.0295971	-0.0157745	0.752993	4.20666
-0.0349483	-0.0363032	0.775528	4.57761			-0.0557254	-0.0571352	0.769726	4.39609			-0.0304355	-0.0160839	0.752328	4.18292
-0.0359888	-0.0370648	0.775244	4.57143			-0.0567494	-0.0578439	0.769399	4.37678			-0.031252	-0.0163109	0.751668	4.15973
-0.0370289	-0.0378162	0.774958	4.56601			-0.0577427	-0.0584862	0.76907	4.35809			-0.0320517	-0.0164768	0.75101	4.13718
-0.0380687	-0.0385604	0.774672	4.56136			-0.0587141	-0.0590812	0.768739	4.34009			-0.0328395	-0.0165992	0.750354	4.11533
-0.0391083	-0.0392991	0.774385	4.55748			-0.0596697	-0.0596421	0.768407	4.32282			-0.0336187	-0.0166905	0.749699	4.09424
-0.0401478	-0.0400338	0.774099	4.55435			-0.0606138	-0.0601783	0.768074	4.30634			-0.0343918	-0.0167592	0.749045	4.07395
-0.0411872	-0.0407655	0.773813	4.55194			-0.0615495	-0.0606963	0.767741	4.29066			-0.0351603	-0.0168115	0.748392	4.05447
-0.0422265	-0.0414949	0.773527	4.5502			-0.062479	-0.0612008	0.767407	4.27582			-0.0359254	-0.0168516	0.747739	4.03583
-0.0432658	-0.0422226	0.773242	4.5491			-0.0634038	-0.0616952	0.767074	4.26182			-0.036688	-0.0168826	0.747086	4.01804
-0.0443051	-0.0429489	0.772957	4.54858			-0.0643251	-0.062182	0.76674	4.24869			-0.0374488	-0.0169068	0.746434	4.00112
-0.0453444	-0.0436742	0.772673	4.54856			-0.0652438	-0.062663	0.766406	4.23643			-0.0382081	-0.0169258	0.745781	3.98507
-0.0463837	-0.0443987	0.772389	4.54898			-0.0661604	-0.0631394	0.766073	4.22506			-0.0389663	-0.0169408	0.745129	3.96991
-0.047423	-0.0451225	0.772106	4.54976			-0.0670755	-0.0636124	0.76574	4.21457			-0.0397237	-0.0169527	0.744477	3.95564
-0.0484623	-0.0458457	0.771823	4.55083			-0.0679893	-0.0640826	0.765407	4.20497			-0.0404803	-0.0169623	0.743825	3.94226
-0.0495017	-0.0465686	0.771541	4.55208			-0.0689021	-0.0645506	0.765075	4.19627			-0.0412365	-0.0169699	0.743174	3.92978
-0.0505411	-0.0472911	0.77126	4.55346			-0.0698142	-0.0650169	0.764743	4.18847			-0.0419922	-0.0169761	0.742522	3.9182
-0.0515806	-0.0480132	0.77098	4.55488			-0.0707257	-0.0654819	0.764411	4.18157			-0.0427476	-0.016981	0.74187	3.90752
-0.0526201	-0.0487352	0.7707	4.55626			-0.0716367	-0.0659457	0.764079	4.17557			-0.0435027	-0.0169851	0.741218	3.89775
-0.0536596	-0.0494569	0.770421	4.55756			-0.0725474	-0.0664086	0.763748	4.17045			-0.0442575	-0.0169883	0.740566	3.88887
-0.0546992	-0.0501785	0.770142	4.55871			-0.0734577	-0.0668708	0.763417	4.16614			-0.0450122	-0.016991	0.739915	3.88087
-0.0557388	-0.0508999	0.769865	4.55968			-0.0743679	-0.0673324	0.763087	4.16258			-0.0457668	-0.0169932	0.739263	3.87369
-0.0567783	-0.0516203	0.769587	4.56043			-0.0752778	-0.0677936	0.762756	4.15963			-0.0465212	-0.016995	0.738611	3.86725
-0.0578135	-0.0523325	0.769307	4.56095			-0.0761876	-0.0682543	0.762427	4.15713			-0.0472755	-0.0169964	0.737959	3.86143
-0.0588405	-0.0530276	0.769025	4.56124			-0.0770973	-0.0687147	0.762097	4.15486			-0.0480297	-0.0169976	0.737307	3.85608
-0.0598545	-0.0536957	0.768741	4.56128			-0.0780069	-0.0691748	0.761768	4.1526			-0.0487838	-0.0169986	0.736655	3.85098
-0.0608498	-0.0543256	0.768453	4.5611			-0.0789165	-0.0696346	0.76144	4.15009			-0.0495379	-0.0169994	0.736004	3.84593
-0.0618201	-0.0549044	0.768161	4.56072			-0.079826	-0.0700943	0.761111	4.1471			-0.0502919	-0.017	0.735352	3.84069
-0.0627586	-0.0554181	0.767865	4.56015			-0.0807355	-0.0705538	0.760783	4.14342			-0.0510456	-0.0169981	0.734696	3.83502
-0.0636576	-0.0558514	0.767564	4.55942			-0.081645	-0.0710132	0.760456	4.13893			-0.0517964	-0.0169875	0.734034	3.82876
-0.0645094	-0.0561888	0.767256	4.55857			-0.0825544	-0.0714724	0.760129	4.13356			-0.0525411	-0.0169584	0.733365	3.82176
-0.0653061	-0.0564144	0.766942	4.55762			-0.0834639	-0.0719315	0.759802	4.12734			-0.0532765	-0.0169	0.732688	3.814
-0.0660401	-0.056513	0.766621	4.55661			-0.0843726	-0.072388	0.759472	4.12042			-0.0539991	-0.0168012	0.732004	3.80551
-0.0667041	-0.0564705	0.766293	4.55555			-0.0852763	-0.0728361	0.759137	4.11298			-0.0547054	-0.0166504	0.731312	3.79641
-0.0672917	-0.0562742	0.765957	4.55449			-0.0861699	-0.0732659	0.758795	4.10525			-0.0553916	-0.0164355	0.730614	3.78689
-0.0677973	-0.0559136	0.765614	4.55343			-0.0870477	-0.0736671	0.758446	4.09749			-0.0560538	-0.0161438	0.729908	3.77716
-0.0682167	-0.0553806	0.765263	4.55239			-0.0879041	-0.0740288	0.758089	4.08991			-0.0566881	-0.0157627	0.729195	3.76744
-0.0685468	-0.0546699	0.764905	4.55141			-0.088733	-0.0743394	0.757722	4.08269			-0.0572904	-0.0152793	0.728476	3.75793
-0.0687857	-0.0537789	0.764541	4.55048			-0.0895281	-0.0745867	0.757346	4.07598			-0.0578569	-0.0146813	0.72775	3.7488
-0.0689333	-0.052708	0.764171	4.54962			-0.0902827	-0.0747581	0.756959	4.06987			-0.0583836	-0.0139567	0.727018	3.74017
-0.0689904	-0.0514599	0.763795	4.54884			-0.0909897	-0.0748403	0.75656	4.06443			-0.0588672	-0.0130946	0.726281	3.73215
-0.0689591	-0.0500399	0.763415	4.54813			-0.0916421	-0.0748199	0.756148	4.05969			-0.0593044	-0.0120851	0.72554	3.72478
-0.0688466	-0.0484631	0.763032	4.54755			-0.0922372	-0.0746917	0.755724	4.05566			-0.0596954	-0.0109292	0.724796	3.71812
-0.0686733	-0.0467685	0.762647	4.54726			-0.0927863	-0.0744772	0.755291	4.05239			-0.0600504	-0.00965916	0.724049	3.71219
-0.0684569	-0.0449902	0.76226	4.54743			-0.0933014	-0.0741985	0.754851	4.04991			-0.0603792	-0.00830567	0.7233	3.70705
-0.0682096	-0.043152	0.761873	4.54817			-0.0937909	-0.0738716	0.754406	4.04825			-0.0606886	-0.00689065	0.722551	3.70272
-0.0679401	-0.0412703	0.761486	4.54956			-0.0942611	-0.0735081	0.753957	4.04743			-0.0609837	-0.00542979	0.721801	3.69922
-0.0676544	-0.0393569	0.761099	4.55167			-0.0947164	-0.0731167	0.753505	4.04747			-0.0612681	-0.00393444	0.721051	3.69657
-0.0673569	-0.03742	0.760712	4.55452			-0.0951604	-0.0727036	0.753051	4.04837			-0.0615444	-0.0024129	0.7203	3.69478
-0.0670507	-0.0354657	0.760326	4.55812			-0.0955954	-0.0722737	0.752596	4.05014			-0.0618144	-0.000871276	0.719549	3.69387
-0.066738	-0.0334983	0.75994	4.56244			-0.0960235	-0.0718307	0.752139	4.0528			-0.0620798	0.000685865	0.718798	3.69384
-0.0664204	-0.0315208	0.759555	4.56745			-0.096446	-0.0713772	0.751681	4.05635			-0.0623414	0.00225509	0.718046	3.69469
-0.0660991	-0.0295357	0.75917	4.5731			-0.0968643	-0.0709155	0.751222	4.06079			-0.0626002	0.0038338	0.717294	3.69644
-0.0657751	-0.0275446	0.758786	4.57934			-0.097279	-0.0704473	0.750763	4.06613			-0.0628568	0.00541999	0.716542	3.69909
-0.065449	-0.0255489	0.758402	4.5861			-0.097691	-0.0699737	0.750303	4.07237			-0.0631117	0.00701211	0.71579	3.70263
-0.0651213	-0.0235495	0.75802	4.5933			-0.0981007	-0.069496	0.749843	4.07952			-0.0633653	0.00860896	0.715037	3.70708
-0.0647924	-0.0215472	0.757637	4.60085			-0.0985087	-0.0690148	0.749382	4.08757			-0.0636177	0.0102096	0.714284	3.71243
-0.0644626	-0.0195427	0.757256	4.60867			-0.0989152	-0.0685309	0.74892	4.09653			-0.0638694	0.0118133	0.713531	3.71869
-0.0641322	-0.0175362	0.756875	4.61665			-0.0993205	-0.0680447	0.748459	4.10639			-0.0641205	0.0134194	0.712777	3.72586
-0.0638013	-0.0155283	0.756495	4.6247			-0.0997249	-0.0675568	0.747997	4.11717			-0.0643711	0.0150274	0.712023	3.73393
-0.06347	-0.0135192	0.756116	4.63273			-0.100128	-0.0670674	0.747535	4.12885			-0.0646213	0.0166371	0.711268	3.74291
-0.0631385	-0.011509	0.755737	4.64065			-0.100531	-0.0665768	0.747072	4.14143			-0.0648713	0.018248	0.710513	3.75281
-0.0628069	-0.00949811	0.755359	4.64839			-0.100934	-0.0660852	0.746609	4.15487			-0.0651211	0.01986	0.709758	3.76361
-0.0624753	-0.00748652	0.754982	4.65587			-0.101336	-0.0655929	0.746146	4.16907			-0.0653708	0.0214728	0.709002	3.77533
-0.0621436	-0.0054744	0.754605	4.66305			-0.101737	-0.0650999	0.745683	4.18389			-0.0656204	0.0230862	0.708246	3.78795
-0.061812	-0.00346182	0.754229	4.66989			-0.102139	-0.0646064	0.745219	4.19914			-0.06587	0.0247002	0.707489	3.80141
-0.0614805	-0.00144887	0.753854	4.67636			-0.10254	-0.0641125	0.744755	4.21454			-0.0661196	0.0263147	0.706732	3.81566
-0.0611491	0.000564389	0.75348	4.68245			-0.102941	-0.0636182	0.744291	4.22983			-0.0663693	0.0279295	0.705974	3.83054
-0.0608178	0.00257791	0.753106	4.68817			-0.103342	-0.0631236	0.743827	4.24476			-0.0666191	0.0295445	0.705217	3.84587
-0.0604867	0.00459165	0.752732	4.69353			-0.103742	-0.0626288	0.743362	4.2591			-0.0668689	0.0311598	0.704458	3.86138
-0.0601557	0.00660558	0.75236	4.69856			-0.104143	-0.0621339	0.742898	4.27265			-0.0671188	0.0327752	0.703699	3.87683
-0.0598249	0.00861967	0.751988	4.70329			-0.104544	-0.0616388	0.742433	4.28525			-0.0673689	0.0343908	0.70294	3.89194
-0.0594943	0.0106339	0.751617	4.70774			-0.104944	-0.0611436	0.741968	4.29675			-0.0676191	0.0360064	0.70218	3.90649
-0.059164	0.0126482	0.751246	4.71197			-0.105344	-0.0606482	0.741502	4.30703			-0.0678694	0.0376221	0.70142	3.92028
-0.0588338	0.0146627	0.750876	4.71601			-0.105745	-0.0601529	0.741037	4.31603			-0.0681198	0.0392379	0.700659	3.93313
-0.0585038	0.0166772	0.750507	4.71989			-0.106145	-0.0596574	0.740571	4.32382			-0.0683705	0.0408537	0.699898	3.9449
-0.058174	0.0186919	0.750138	4.72365			-0.106545	-0.0591619	0.740105	4.33059			-0.0686212	0.0424695	0.699137	3.95548
-0.0578444	0.0207066	0.74977	4.72733			-0.106945	-0.0586664	0.739639	4.3366			-0.0688722	0.0440853	0.698375	3.96485
-0.057515	0.0227213	0.749403	4.73095			-0.107346	-0.0581708	0.739172	4.34217			-0.0691233	0.0457011	0.697612	3.97314
-0.0571858	0.0247362	0.749036	4.73454			-0.107746	-0.0576753	0.738706	4.34761			-0.0693746	0.0473169	0.696849	3.98056
-0.0568569	0.026751	0.74867	4.73811			-0.108146	-0.0571797	0.738239	4.35317			-0.069626	0.0489327	0.696086	3.98738
-0.0565281	0.028766	0.748305	4.74169			-0.108546	-0.0566841	0.737772	4.35908			-0.0698776	0.0505484	0.695322	3.99391
-0.0561996	0.030781	0.74794	4.74528			-0.108946	-0.0561885	0.737305	4.36546			-0.0701295	0.0521641	0.694558	4.00042
-0.0558706	0.0327954	0.747577	4.74889			-0.109346	-0.0556929	0.736837	4.37244			-0.0703815	0.0537797	0.693793	4.00715
-0.0555382	0.0348066	0.747215	4.75252			-0.109746	-0.0551973	0.73637	4.38006			-0.0706336	0.0553953	0.693027	4.01429
-0.0551985	0.0368105	0.746855	4.75618			-0.110146	-0.0547017	0.735902	4.38835			-0.070886	0.0570109	0.692261	4.02195
-0.0548463	0.0388019	0.7465	4.75986			-0.110547	-0.0542061	0.735434	4.3973			-0.0711386	0.0586264	0.691495	4.03022
-0.0544751	0.0407741	0.746151	4.76356			-0.110947	-0.0537106	0.734966	4.40684			-0.0713913	0.0602419	0.690728	4.03914
-0.0540775	0.0427191	0.745811	4.76727			-0.111347	-0.053215	0.734497	4.4169			-0.0716443	0.0618573	0.689961	4.04872
-0.0536448	0.0446274	0.745481	4.77099			-0.111747	-0.0527195	0.734028	4.42734			-0.0718974	0.0634726	0.689193	4.05892
-0.0531682	0.0464888	0.745164	4.7747			-0.112147	-0.0522239	0.73356	4.43799			-0.0721507	0.0650879	0.688425	4.06967
-0.0526458	0.0483009	0.744861	4.77839			-0.112547	-0.0517284	0.733091	4.44865			-0.0724043	0.0667031	0.687656	4.08088
-0.0520817	0.0500676	0.744573	4.78206			-0.112947	-0.0512329	0.732621	4.45909			-0.072658	0.0683183	0.686887	4.09241
-0.0514805	0.0517941	0.744296	4.7857			-0.11334	-0.0507343	0.732153	4.46907			-0.072912	0.0699333	0.686117	4.10408
-0.0508471	0.0534856	0.744031	4.7893			-0.11372	-0.0502295	0.731686	4.47838			-0.0731661	0.0715484	0.685346	4.11568
-0.050186	0.0551471	0.743774	4.79284			-0.114076	-0.049714	0.731221	4.48684			-0.0734204	0.0731633	0.684576	4.127
-0.0495014	0.0567831	0.743526	4.79633			-0.114395	-0.0491821	0.73076	4.49435			-0.073675	0.0747782	0.683804	4.13783
-0.048797	0.0583977	0.743285	4.79976			-0.114663	-0.048627	0.730305	4.50087			-0.0739298	0.0763931	0.683032	4.14796
-0.0480759	0.0599943	0.74305	4.80313			-0.114863	-0.048041	0.729857	4.50649			-0.0741847	0.0780078	0.68226	4.15727
-0.0473319	0.061562	0.742826	4.80642			-0.114974	-0.0474157	0.729418	4.51133			-0.0744399	0.0796225	0.681487	4.16568
-0.0465536	0.0630844	0.742613	4.80964			-0.114977	-0.0467423	0.728991	4.51561			-0.0746953	0.0812371	0.680714	4.17322
-0.0457324	0.0645482	0.742416	4.8128			-0.114874	-0.0460235	0.72857	4.51955			-0.074951	0.0828517	0.67994	4.17997
-0.0448626	0.0659436	0.742234	4.81588			-0.114673	-0.0452623	0.728157	4.52339			-0.0752068	0.0844661	0.679165	4.18608
-0.0439414	0.067265	0.742069	4.81889			-0.114386	-0.0444636	0.72775	4.52733			-0.0754625	0.0860802	0.67839	4.19175
-0.0429678	0.0685095	0.741921	4.82183			-0.114024	-0.0436325	0.727348	4.53154			-0.0757137	0.0876891	0.677617	4.1972
-0.0419431	0.0696772	0.741788	4.82471			-0.113599	-0.0427736	0.726951	4.53616			-0.0759551	0.0892873	0.676847	4.20263
-0.0408693	0.0707699	0.741671	4.82752			-0.113119	-0.0418913	0.726558	4.54126			-0.0761799	0.0908671	0.676084	4.20821
-0.0397496	0.0717905	0.741569	4.83028			-0.112594	-0.0409891	0.726169	4.5469			-0.0763796	0.0924193	0.675332	4.21409
-0.0385871	0.0727426	0.741479	4.83298			-0.11203	-0.0400703	0.725782	4.55309			-0.0765441	0.0939325	0.674594	4.22038
-0.0373848	0.0736296	0.741402	4.83563			-0.111435	-0.0391377	0.725399	4.55982			-0.0766619	0.0953939	0.673876	4.22714
-0.0361456	0.0744545	0.741337	4.83823			-0.110814	-0.0381936	0.725017	4.56702			-0.0767205	0.0967894	0.673184	4.2344
-0.0348716	0.0752196	0.741282	4.84079			-0.110171	-0.03724	0.724638	4.57461			-0.0767073	0.0981042	0.672524	4.24217
-0.0335646	0.0759262	0.741238	4.8433			-0.10951	-0.0362785	0.724261	4.58248			-0.0766096	0.0993236	0.6719	4.25041
-0.0322255	0.0765746	0.741204	4.84578			-0.108834	-0.0353104	0.723885	4.59048			-0.0764277	0.100445	0.671318	4.25907
-0.0308552	0.0771644	0.741179	4.84823			-0.108145	-0.0343371	0.723509	4.59844			-0.0761694	0.101478	0.670773	4.26804
-0.0294538	0.0776941	0.741165	4.85064			-0.107416	-0.0333468	0.723128	4.60618			-0.0758443	0.102432	0.670262	4.2772
-0.0280212	0.0781617	0.74116	4.85302			-0.106613	-0.0323295	0.722748	4.61351			-0.0754618	0.10332	0.66978	4.28643
-0.0265572	0.0785646	0.741166	4.85537			-0.105712	-0.0312763	0.722373	4.62027			-0.0750305	0.104151	0.669322	4.29555
-0.0250616	0.0788997	0.741182	4.85769			-0.104691	-0.0301808	0.722008	4.62636			-0.074558	0.104932	0.668886	4.30441
-0.0235342	0.0791642	0.741209	4.85999			-0.103538	-0.0290394	0.721655	4.6317			-0.0740363	0.105653	0.668478	4.31284
-0.0219749	0.079355	0.741246	4.86225			-0.102247	-0.0278503	0.721317	4.6363			-0.0734518	0.106296	0.668104	4.32073
-0.0203842	0.0794695	0.741294	4.86449			-0.100814	-0.0266133	0.720994	4.64021			-0.0727932	0.106843	0.667767	4.32799
-0.0187624	0.0795055	0.741354	4.86671			-0.0992414	-0.0253297	0.720689	4.64357			-0.0720527	0.107284	0.66747	4.33458
-0.0171107	0.0794615	0.741424	4.86889			-0.0975327	-0.0240013	0.720402	4.64652			-0.0712262	0.107611	0.667215	4.34054
-0.0154304	0.0793366	0.741504	4.87105			-0.095693	-0.0226304	0.720134	4.64925			-0.0703123	0.107822	0.667002	4.34592
-0.0137231	0.0791309	0.741596	4.87318			-0.0937282	-0.0212196	0.719884	4.65193			-0.0693122	0.107915	0.66683	4.35086
-0.0119909	0.078845	0.741697	4.87528			-0.0916445	-0.0197716	0.719653	4.65472			-0.0682288	0.107894	0.666696	4.3555
-0.0102361	0.0784806	0.741807	4.87735			-0.0894475	-0.0182887	0.71944	4.65774			-0.0670661	0.107762	0.666599	4.35998
-0.00846117	0.07804	0.741927	4.8794			-0.0871425	-0.0167733	0.719247	4.66111			-0.0658288	0.107523	0.666536	4.36446
-0.00666863	0.077526	0.742055	4.88141			-0.0847339	-0.0152272	0.719072	4.66488			-0.0645218	0.107184	0.666505	4.36908
-0.00486112	0.076942	0.74219	4.8834			-0.0822254	-0.0136523	0.718916	4.6691			-0.0631497	0.106749	0.666504	4.37393
-0.00304121	0.0762917	0.742332	4.88535			-0.07962	-0.0120502	0.71878	4.67376			-0.0617167	0.106223	0.66653	4.3791
-0.00121135	0.0755791	0.74248	4.88727			-0.07692	-0.0104222	0.718662	4.67885			-0.0602264	0.10561	0.666582	4.38463
0.000626149	0.0748081	0.742634	4.88916			-0.0741273	-0.00876957	0.718565	4.68431			-0.0586818	0.104912	0.666659	4.39055
0.00246915	0.0739824	0.742793	4.89103			-0.0712432	-0.00709352	0.718487	4.69006			-0.0570852	0.104132	0.666759	4.39686
0.00431569	0.0731058	0.742955	4.89286			-0.0682691	-0.00539523	0.71843	4.696			-0.0554385	0.10327	0.666882	4.40351
0.00616402	0.0721814	0.743122	4.89466			-0.0652062	-0.00367591	0.718394	4.702			-0.053743	0.102328	0.667028	4.41046
0.00801249	0.0712125	0.743291	4.89643			-0.0620558	-0.00193683	0.718379	4.70793			-0.0519996	0.101305	0.667195	4.41762
0.00985964	0.0702014	0.743464	4.89817			-0.0588194	-0.000179384	0.718386	4.71365			-0.0502091	0.1002	0.667384	4.4249
0.0117041	0.0691507	0.743639	4.89988			-0.0554988	0.00159494	0.718414	4.71902			-0.0483723	0.0990126	0.667596	4.43217
0.0135444	0.068062	0.743816	4.90156			-0.0520962	0.00338451	0.718465	4.72392			-0.0464897	0.0977417	0.667829	4.43932
0.0153795	0.066937	0.743995	4.90322			-0.0486143	0.00518757	0.718538	4.72828			-0.0445623	0.0963866	0.668084	4.44624
0.0172078	0.0657771	0.744176	4.90485			-0.045056	0.00700222	0.718634	4.73207			-0.042591	0.0949464	0.668362	4.4528
0.0190283	0.0645832	0.744359	4.90645			-0.0414251	0.00882648	0.718752	4.73529			-0.0405771	0.0934209	0.668661	4.45893
0.0208394	0.0633564	0.744543	4.90802			-0.0377254	0.0106583	0.718893	4.73801			-0.0385221	0.0918102	0.668982	4.46458
0.0226398	0.0620974	0.744729	4.90957			-0.0339615	0.0124954	0.719056	4.74033			-0.036428	0.0901151	0.669324	4.46974
0.0244281	0.0608071	0.744917	4.91109			-0.0301379	0.0143358	0.719241	4.74236			-0.034297	0.0883369	0.669687	4.47443
0.0262027	0.0594862	0.745106	4.91259			-0.0262596	0.0161772	0.719448	4.74424			-0.0321316	0.0864772	0.67007	4.47872
0.0279622	0.0581354	0.745296	4.91406			-0.0223319	0.0180175	0.719676	4.74611			-0.0299345	0.0845387	0.670472	4.48269
0.0297052	0.0567558	0.745488	4.91551			-0.0183599	0.0198547	0.719925	4.74808			-0.0277086	0.0825241	0.670892	4.48646
0.03143	0.0553482	0.745681	4.91694			-0.014349	0.0216868	0.720194	4.75026			-0.025457	0.0804368	0.67133	4.49013
0.0331352	0.0539137	0.745876	4.91835			-0.0103043	0.0235119	0.720482	4.75273			-0.0231829	0.0782804	0.671783	4.49382
0.0348195	0.0524535	0.746073	4.91973			-0.00623107	0.0253282	0.720789	4.75552			-0.0208894	0.0760591	0.672252	4.49762
0.0364817	0.050969	0.74627	4.92109			-0.0021341	0.0271342	0.721114	4.75868			-0.0185795	0.0737767	0.672734	4.50161
0.0381204	0.0494615	0.746469	4.92242			0.00198181	0.0289282	0.721456	4.76219			-0.0162562	0.0714375	0.673229	4.50585
0.0397347	0.0479325	0.74667	4.92374			0.00611218	0.030709	0.721814	4.76604			-0.0139223	0.0690456	0.673735	4.51037
0.0413237	0.0463835	0.746871	4.92504			0.0102527	0.0324753	0.722188	4.77017			-0.0115806	0.0666051	0.674252	4.51519
0.0428866	0.0448162	0.747074	4.92631			0.0143994	0.0342259	0.722577	4.77451			-0.00923341	0.0641198	0.674777	4.52029
0.0444228	0.043232	0.747278	4.92756			0.0185485	0.0359597	0.72298	4.77898			-0.00688318	0.0615934	0.675311	4.52565
0.0459317	0.0416327	0.747484	4.9288			0.0226963	0.0376757	0.723397	4.78347			-0.00453205	0.0590295	0.675853	4.53121
0.047413	0.0400197	0.74769	4.93001			0.0268395	0.0393729	0.723827	4.78788			-0.00218205	0.0564311	0.676401	4.5369
0.0488663	0.0383945	0.747897	4.9312			0.0309748	0.0410505	0.724268	4.79209			0.000164941	0.0538014	0.676955	4.54266
0.0502915	0.0367587	0.748106	4.93238			0.0350991	0.0427074	0.724722	4.79601			0.0025071	0.0511431	0.677515	4.54838
0.0516882	0.0351136	0.748315	4.93353			0.0392094	0.0443428	0.725186	4.79956			0.00484271	0.0484589	0.67808	4.55398
0.0530564	0.0334605	0.748526	4.93466			0.0433028	0.0459559	0.725661	4.80268			0.00717007	0.0457513	0.67865	4.55937
0.0543958	0.0318007	0.748737	4.93578			0.0473763	0.0475457	0.726146	4.80536			0.00948754	0.0430225	0.679224	4.56448
0.0557062	0.0301354	0.748949	4.93687			0.0514273	0.0491114	0.72664	4.80762			0.0117935	0.0402748	0.679803	4.56925
0.0569873	0.0284658	0.749163	4.93795			0.0554528	0.050652	0.727142	4.8095			0.0140863	0.0375103	0.680385	4.57366
0.0582389	0.0267929	0.749377	4.93901			0.0594501	0.0521667	0.727653	4.81109			0.0163642	0.0347313	0.680972	4.5777
0.0594607	0.0251179	0.749593	4.94005			0.0634164	0.0536546	0.728171	4.81248			0.0186258	0.0319399	0.681562	4.5814
0.0606521	0.0234418	0.749809	4.94107			0.067349	0.0551148	0.728697	4.81377			0.0208692	0.029138	0.682156	4.58481
0.0618127	0.0217655	0.750027	4.94207			0.071245	0.0565464	0.729228	4.81507			0.023093	0.0263279	0.682754	4.58801
0.0629419	0.0200902	0.750246	4.94306			0.0751018	0.0579485	0.729766	4.81647			0.0252954	0.0235117	0.683355	4.59107
0.0640393	0.0184168	0.750467	4.94403			0.0789168	0.0593203	0.730308	4.81804			0.0274749	0.0206915	0.683961	4.59407
0.0651042	0.0167464	0.750689	4.94498			0.0826871	0.0606611	0.730856	4.81984			0.0296301	0.0178694	0.684569	4.5971
0.0661361	0.01508	0.750912	4.94591			0.0864104	0.0619701	0.731407	4.82191			0.0317593	0.0150476	0.685182	4.60022
0.0671343	0.0134185	0.751137	4.94683			0.0900842	0.0632466	0.731962	4.82427			0.0338612	0.0122282	0.685799	4.60349
0.0680984	0.011763	0.751364	4.94773			0.0937059	0.0644899	0.73252	4.82691			0.0359345	0.00941323	0.686419	4.60695
0.0690277	0.0101144	0.751593	4.94862			0.0972734	0.0656995	0.73308	4.82981			0.0379781	0.00660479	0.687043	4.61064
0.0699219	0.00847379	0.751823	4.94949			0.100785	0.0668749	0.733643	4.83292			0.0399907	0.00380486	0.68767	4.61454
0.0707805	0.00684206	0.752056	4.95034			0.104237	0.0680157	0.734206	4.83619			0.0419715	0.00101536	0.688301	4.61865
0.0716033	0.00522014	0.752291	4.95118			0.10763	0.0691214	0.73477	4.83954			0.0439195	-0.00176187	0.688936	4.62294
0.0723899	0.00360891	0.752527	4.95201			0.11096	0.0701918	0.735335	4.84289			0.0458339	-0.00452504	0.689575	4.62738
0.0731404	0.00200923	0.752766	4.95282			0.114226	0.0712266	0.735899	4.84615			0.047714	-0.00727247	0.690217	4.63189
0.0738546	0.000421892	0.753007	4.95361			0.117428	0.0722258	0.736463	4.84925			0.0495593	-0.0100026	0.690863	4.63643
0.0745325	-0.00115235	0.75325	4.95439			0.120563	0.0731891	0.737026	4.8521			0.0513692	-0.0127137	0.691512	4.64092
0.0751743	-0.00271277	0.753496	4.95516			0.12363	0.0741165	0.737587	4.85466			0.0531432	-0.0154046	0.692165	4.6453
0.0757801	-0.00425873	0.753744	4.95591			0.126628	0.075008	0.738147	4.85689			0.0548809	-0.0180737	0.692822	4.6495
0.0763502	-0.00578959	0.753994	4.95665			0.129557	0.0758636	0.738704	4.85878			0.0565819	-0.0207198	0.693482	4.65348
0.0768847	-0.00730478	0.754247	4.95738			0.132414	0.0766835	0.739258	4.86036			0.0582459	-0.0233414	0.694145	4.6572
0.0773841	-0.00880374	0.754501	4.95809			0.135201	0.0774677	0.73981	4.86165			0.0598724	-0.0259375	0.694812	4.66065
0.0778487	-0.010286	0.754759	4.95879			0.137915	0.0782163	0.740358	4.86273			0.0614611	-0.0285067	0.695483	4.66382
0.0782786	-0.011751	0.755018	4.95948			0.140556	0.0789295	0.740903	4.86368			0.0630117	-0.0310478	0.696157	4.66675
0.0786744	-0.0131982	0.75528	4.96015			0.143123	0.0796073	0.741444	4.86456			0.0645238	-0.0335597	0.696835	4.66948
0.0790362	-0.0146273	0.755544	4.96082			0.145617	0.0802501	0.741981	4.86545			0.0659969	-0.0360412	0.697517	4.67205
0.0793644	-0.0160377	0.755811	4.96147			0.148035	0.0808578	0.742513	4.86644			0.0674308	-0.0384911	0.698202	4.67453
0.0796591	-0.017429	0.756079	4.96211			0.150379	0.0814308	0.743041	4.86756			0.0688249	-0.0409082	0.698891	4.67698
0.0799208	-0.0188006	0.75635	4.96274			0.152647	0.0819691	0.743565	4.86888			0.070179	-0.0432913	0.699584	4.67946
0.0801496	-0.0201522	0.756624	4.96335			0.154839	0.0824729	0.744083	4.87041			0.0714924	-0.0456394	0.700281	4.68201
0.0803456	-0.0214833	0.756899	4.96396			0.156955	0.0829424	0.744596	4.87217			0.072765	-0.0479513	0.700982	4.68469
0.0805091	-0.0227933	0.757177	4.96455			0.158993	0.0833777	0.745104	4.87415			0.0739962	-0.0502259	0.701687	4.68751
0.0806402	-0.0240818	0.757458	4.96514			0.160955	0.083779	0.745606	4.87633			0.0751857	-0.0524621	0.702396	4.69049
0.0807392	-0.0253482	0.75774	4.96571			0.162838	0.0841464	0.746102	4.87867			0.0763331	-0.0546588	0.703109	4.69364
0.0808061	-0.0265923	0.758025	4.96628			0.164644	0.0844801	0.746593	4.88112			0.0774382	-0.056815	0.703827	4.69694
0.0808412	-0.0278134	0.758312	4.96683			0.166371	0.0847803	0.747078	4.88362			0.0785007	-0.0589298	0.704549	4.70037
0.0808446	-0.0290111	0.758601	4.96737			0.168019	0.0850472	0.747557	4.88611			0.0795204	-0.0610022	0.705275	4.70389
0.0808166	-0.030185	0.758892	4.96791			0.169589	0.0852808	0.748029	4.88852			0.0804971	-0.0630315	0.706005	4.70747
0.0807574	-0.0313346	0.759185	4.96843			0.171079	0.0854815	0.748495	4.89079			0.0814308	-0.0650167	0.706739	4.71104
0.0806672	-0.0324597	0.759481	4.96894			0.17249	0.0856494	0.748955	4.89286			0.0823213	-0.0669573	0.707478	4.71456
0.0805464	-0.0335599	0.759778	4.96945			0.173821	0.0857847	0.749409	4.8947			0.0831686	-0.0688525	0.708221	4.71798
0.0803952	-0.0346349	0.760077	4.96994			0.175073	0.0858876	0.749856	4.89629			0.0839729	-0.0707017	0.708969	4.72126
0.0802141	-0.0356843	0.760378	4.97043			0.176246	0.0859585	0.750296	4.89761			0.0847342	-0.0725044	0.70972	4.72437
0.0800034	-0.036708	0.760681	4.97091			0.177339	0.0859975	0.75073	4.8987			0.0854527	-0.0742602	0.710476	4.72727
0.0797636	-0.0377058	0.760986	4.97138			0.178353	0.086005	0.751158	4.89959			0.0861286	-0.0759687	0.711235	4.72997
0.079495	-0.0386775	0.761293	4.97184			0.179287	0.0859813	0.751579	4.90031			0.0867621	-0.0776294	0.711999	4.73248
0.0791982	-0.039623	0.761601	4.9723			0.180143	0.0859266	0.751993	4.90094			0.0873535	-0.0792421	0.712766	4.7348
0.0788737	-0.0405421	0.76191	4.97274			0.180921	0.0858413	0.752401	4.90153			0.087903	-0.0808065	0.713537	4.73698
0.0785219	-0.0414349	0.762221	4.97318			0.18162	0.0857257	0.752802	4.90215			0.0884111	-0.0823224	0.714312	4.73905
0.0781434	-0.0423012	0.762533	4.97361			0.182241	0.0855803	0.753198	4.90284			0.0888779	-0.0837896	0.71509	4.74106
0.0777388	-0.043141	0.762847	4.97403			0.182785	0.0854055	0.753586	4.90365			0.0893039	-0.0852079	0.715872	4.74306
0.0773085	-0.0439544	0.763162	4.97445			0.183253	0.0852015	0.753969	4.90461			0.0896894	-0.0865771	0.716657	4.74508
0.076853	-0.0447412	0.763477	4.97486			0.183644	0.0849688	0.754346	4.90574			0.0900347	-0.0878972	0.717445	4.74717
0.076373	-0.0455016	0.763794	4.97526			0.18396	0.0847079	0.754716	4.90705			0.0903403	-0.0891679	0.718235	4.74934
0.0758688	-0.0462354	0.764111	4.97565			0.184201	0.0844191	0.755081	4.90854			0.0906065	-0.0903893	0.719029	4.75163
0.0753412	-0.0469428	0.76443	4.97604			0.184368	0.0841029	0.75544	4.91017			0.0908336	-0.0915612	0.719826	4.75404
0.0747905	-0.0476237	0.764749	4.97642			0.184462	0.0837598	0.755793	4.91193			0.091022	-0.0926835	0.720625	4.75658
0.0742173	-0.0482782	0.765068	4.9768			0.184483	0.0833902	0.75614	4.91376			0.0911722	-0.0937562	0.721426	4.75922
0.073622	-0.0489063	0.765388	4.97716			0.184433	0.0829946	0.756483	4.91562			0.0912845	-0.0947792	0.72223	4.76195
0.0730052	-0.0495079	0.765709	4.97753			0.184311	0.0825733	0.75682	4.91747			0.0913592	-0.0957525	0.723035	4.76473
0.0723674	-0.0500832	0.766029	4.97788			0.18412	0.082127	0.757152	4.91924			0.0913968	-0.0966761	0.723843	4.76755
0.071709	-0.0506321	0.76635	4.97823			0.18386	0.081656	0.757479	4.9209			0.0913977	-0.09755	0.724652	4.77036
0.0710306	-0.0511546	0.76667	4.97858			0.183531	0.0811609	0.757801	4.9224			0.0913623	-0.0983742	0.725462	4.77312
0.0703326	-0.0516509	0.766991	4.97891			0.183135	0.0806421	0.758118	4.92372			0.091291	-0.0991488	0.726274	4.77579
0.0696156	-0.052121	0.767312	4.97925			0.182673	0.0801	0.758431	4.92484			0.0911843	-0.0998739	0.727086	4.77836
0.06888	-0.0525649	0.767632	4.97957			0.182145	0.0795353	0.75874	4.92577			0.0910427	-0.10055	0.7279	4.78078
0.0681263	-0.0529828	0.767951	4.9799			0.181553	0.0789482	0.759045	4.92652			0.0908666	-0.101176	0.728714	4.78306
0.0673551	-0.0533746	0.768271	4.98021			0.180897	0.0783394	0.759345	4.92711			0.0906565	-0.101753	0.729529	4.78518
0.0665669	-0.0537406	0.768589	4.98052			0.180178	0.0777093	0.759642	4.92759			0.090413	-0.102282	0.730343	4.78716
0.0657621	-0.0540809	0.768907	4.98083			0.179399	0.0770584	0.759935	4.92801			0.0901365	-0.102762	0.731158	4.78901
0.0649413	-0.0543956	0.769224	4.98113			0.178558	0.0763872	0.760225	4.9284			0.0898276	-0.103194	0.731972	4.79076
0.064105	-0.0546849	0.76954	4.98143			0.177659	0.0756962	0.760511	4.92882			0.0894869	-0.103577	0.732786	4.79243
0.0632538	-0.054949	0.769855	4.98172			0.1767	0.0749858	0.760794	4.9293			0.0891148	-0.103913	0.733599	4.79406
0.0623882	-0.0551881	0.770169	4.98201			0.175685	0.0742565	0.761074	4.92988			0.0887121	-0.104202	0.734411	4.79568
0.0615086	-0.0554023	0.770481	4.98229			0.174613	0.073509	0.761352	4.93058			0.0882793	-0.104444	0.735222	4.79732
0.0606158	-0.055592	0.770792	4.98257			0.173485	0.0727435	0.761626	4.93142			0.087817	-0.10464	0.736031	4.79902
0.0597101	-0.0557574	0.771102	4.98285			0.172304	0.0719608	0.761898	4.9324			0.0873258	-0.104789	0.736839	4.80079
0.0587922	-0.0558988	0.77141	4.98312			0.171069	0.0711612	0.762168	4.93351			0.0868063	-0.104893	0.737645	4.80264
0.0578625	-0.0560164	0.771717	4.98338			0.169783	0.0703452	0.762436	4.93474			0.0862591	-0.104952	0.738448	4.80458
0.0569216	-0.0561104	0.772021	4.98364			0.168446	0.0695134	0.762701	4.93605			0.0856849	-0.104967	0.73925	4.80661
0.05597	-0.0561813	0.772324	4.9839			0.167059	0.0686663	0.762965	4.93743			0.0850842	-0.104937	0.740048	4.80871
0.0550083	-0.0562292	0.772625	4.98415			0.165623	0.0678044	0.763227	4.93882			0.0844577	-0.104864	0.740844	4.81088
0.0540369	-0.0562545	0.772924	4.9844			0.16414	0.0669281	0.763487	4.94018			0.083806	-0.104749	0.741636	4.81309
0.0530564	-0.0562574	0.773221	4.98465			0.162611	0.0660381	0.763746	4.94149			0.0831298	-0.10459	0.742426	4.8153
0.0520673	-0.0562383	0.773515	4.98489			0.161037	0.0651348	0.764004	4.9427			0.0824296	-0.104391	0.743211	4.81751
0.05107	-0.0561975	0.773807	4.98513			0.159419	0.0642187	0.76426	4.94378			0.081706	-0.10415	0.743993	4.81967
0.0500651	-0.0561353	0.774097	4.98537			0.157758	0.0632904	0.764516	4.94473			0.0809597	-0.103868	0.744771	4.82176
0.0490531	-0.0560519	0.774385	4.9856			0.156056	0.0623503	0.76477	4.94552			0.0801913	-0.103547	0.745545	4.82377
0.0480345	-0.0559478	0.77467	4.98583			0.154314	0.061399	0.765024	4.94616			0.0794015	-0.103186	0.746315	4.82567
0.0470096	-0.0558231	0.774952	4.98605			0.152532	0.060437	0.765277	4.94667			0.0785907	-0.102786	0.747079	4.82746
0.0459791	-0.0556783	0.775231	4.98627			0.150713	0.0594648	0.76553	4.94707			0.0777596	-0.102349	0.747839	4.82913
0.0449434	-0.0555136	0.775508	4.98649			0.148856	0.0584828	0.765782	4.94738			0.0769088	-0.101874	0.748594	4.8307
0.0439029	-0.0553294	0.775782	4.98671			0.146965	0.0574917	0.766033	4.94765			0.076039	-0.101362	0.749344	4.83217
0.0428582	-0.055126	0.776054	4.98692			0.145039	0.0564918	0.766285	4.94791			0.0751507	-0.100814	0.750088	4.83357
0.0418096	-0.0549037	0.776322	4.98713			0.14308	0.0554838	0.766536	4.94819			0.0742445	-0.100231	0.750827	4.83491
0.0407577	-0.0546629	0.776587	4.98733			0.141089	0.054468	0.766788	4.94853			0.073321	-0.0996127	0.75156	4.83623
0.0397029	-0.054404	0.776849	4.98754			0.139067	0.053445	0.767039	4.94894			0.0723808	-0.0989605	0.752286	4.83755
0.0386456	-0.0541271	0.777108	4.98774			0.137016	0.0524153	0.767291	4.94946			0.0714245	-0.098275	0.753007	4.83889
0.0375862	-0.0538328	0.777364	4.98793			0.134936	0.0513793	0.767542	4.95009			0.0704527	-0.0975568	0.753721	4.84026
0.0365253	-0.0535214	0.777617	4.98813			0.132829	0.0503376	0.767794	4.95082			0.069466	-0.0968067	0.754429	4.84169
0.0354632	-0.0531932	0.777867	4.98832			0.130696	0.0492906	0.768046	4.95165			0.068465	-0.0960254	0.755131	4.84318
0.0344004	-0.0528486	0.778113	4.98851			0.128539	0.0482388	0.768299	4.95258			0.0674502	-0.0952136	0.755825	4.84474
0.0333372	-0.052488	0.778356	4.98869			0.126358	0.0471826	0.768552	4.95356			0.0664222	-0.0943722	0.756513	4.84636
0.0322741	-0.0521117	0.778595	4.98888			0.124154	0.0461226	0.768806	4.95459			0.0653816	-0.0935017	0.757193	4.84804
0.0312115	-0.0517201	0.778831	4.98906			0.121929	0.0450591	0.76906	4.95562			0.064329	-0.092603	0.757867	4.84976
0.0301497	-0.0513137	0.779064	4.98924			0.119683	0.0439927	0.769314	4.95664			0.0632649	-0.0916769	0.758533	4.8515
0.0290892	-0.0508927	0.779293	4.98941			0.117419	0.0429238	0.769569	4.9576			0.0621899	-0.090724	0.759191	4.85324
0.0280304	-0.0504576	0.779519	4.98959			0.115137	0.0418528	0.769825	4.95848			0.0611045	-0.0897453	0.759842	4.85497
0.0269736	-0.0500088	0.779742	4.98976			0.112837	0.0407801	0.770081	4.95927			0.0600093	-0.0887413	0.760486	4.85667
0.0259192	-0.0495465	0.779961	4.98993			0.110522	0.0397063	0.770338	4.95994			0.0589049	-0.087713	0.761121	4.85831
0.0248676	-0.0490713	0.780176	4.99009			0.108193	0.0386317	0.770595	4.9605			0.0577917	-0.086661	0.761749	4.85988
0.0238191	-0.0485835	0.780388	4.99026			0.10585	0.0375568	0.770853	4.96094			0.0566704	-0.0855862	0.762369	4.86137
0.022774	-0.0480835	0.780596	4.99042			0.103494	0.0364819	0.771112	4.96129			0.0555413	-0.0844893	0.762981	4.86278
0.0217328	-0.0475716	0.780801	4.99058			0.101127	0.0354075	0.771371	4.96155			0.0544052	-0.0833711	0.763585	4.8641
0.0206957	-0.0470482	0.781002	4.99073			0.0987502	0.0343339	0.771631	4.96175			0.0532624	-0.0822323	0.764181	4.86534
0.019663	-0.0465138	0.7812	4.99089			0.0963638	0.0332617	0.771892	4.96193			0.0521135	-0.0810737	0.764768	4.86651
0.0186352	-0.0459686	0.781394	4.99104			0.0939692	0.0321911	0.772153	4.96209			0.0509589	-0.0798961	0.765348	4.86764
0.0176125	-0.0454131	0.781585	4.99119			0.0915674	0.0311226	0.772414	4.96229			0.0497993	-0.0787003	0.765919	4.86872
0.0165952	-0.0448477	0.781772	4.99134			0.0891595	0.0300565	0.772676	4.96252			0.048635	-0.0774869	0.766481	4.86979
0.0155837	-0.0442726	0.781956	4.99149			0.0867465	0.0289932	0.772939	4.96283			0.0474665	-0.0762568	0.767036	4.87086
0.0145782	-0.0436883	0.782136	4.99163			0.0843293	0.027933	0.773201	4.96321			0.0462944	-0.0750107	0.767582	4.87194
0.013579	-0.0430952	0.782313	4.99177			0.0819089	0.0268764	0.773465	4.96367			0.0451191	-0.0737493	0.768119	4.87305
0.0125864	-0.0424936	0.782486	4.99191			0.0794864	0.0258237	0.773728	4.96422			0.0439411	-0.0724734	0.768648	4.87421
0.0116007	-0.0418838	0.782655	4.99205			0.0770627	0.0247751	0.773992	4.96485			0.0427608	-0.0711838	0.769169	4.87541
0.0106222	-0.0412663	0.782822	4.99219			0.0746387	0.0237311	0.774257	4.96554			0.0415787	-0.0698811	0.769681	4.87665
0.00965109	-0.0406414	0.782984	4.99232			0.0722153	0.022692	0.774521	4.96629			0.0403952	-0.0685662	0.770185	4.87795
0.00868766	-0.0400095	0.783144	4.99245			0.0697936	0.0216581	0.774785	4.96706			0.0392107	-0.0672397	0.77068	4.87928
0.00773217	-0.0393708	0.7833	4.99258			0.0673744	0.0206297	0.77505	4.96783			0.0380258	-0.0659023	0.771167	4.88064
0.00678485	-0.0387258	0.783452	4.99271			0.0649585	0.0196071	0.775314	4.96858			0.0368408	-0.0645548	0.771645	4.88201
0.00584594	-0.0380749	0.783602	4.99284			0.062547	0.0185906	0.775579	4.96929			0.0356562	-0.0631978	0.772115	4.88339
0.00491567	-0.0374183	0.783748	4.99296			0.0601405	0.0175805	0.775843	4.96993			0.0344723	-0.0618322	0.772577	4.88475
0.00399426	-0.0367564	0.78389	4.99308			0.0577401	0.0165771	0.776107	4.9705			0.0332896	-0.0604585	0.77303	4.88607
0.00308192	-0.0360896	0.78403	4.9932			0.0553466	0.0155807	0.776371	4.97098			0.0321084	-0.0590775	0.773475	4.88736
0.00217886	-0.0354182	0.784166	4.99332			0.0529606	0.0145915	0.776635	4.97137			0.0309293	-0.0576899	0.773912	4.88859
0.00128528	-0.0347425	0.784299	4.99344			0.0505832	0.0136097	0.776898	4.97168			0.0297525	-0.0562962	0.77434	4.88976
0.000401372	-0.0340628	0.784429	4.99356			0.048215	0.0126358	0.777161	4.97191			0.0285784	-0.0548973	0.774761	4.89087
-0.000472677	-0.0333796	0.784556	4.99367			0.0458569	0.0116698	0.777423	4.97208			0.0274075	-0.0534937	0.775173	4.89192
-0.00133669	-0.0326931	0.78468	4.99378			0.0435096	0.010712	0.777684	4.97221			0.02624	-0.0520862	0.775577	4.8929
-0.00219049	-0.0320037	0.784801	4.99389			0.0411739	0.00976275	0.777945	4.97232			0.0250764	-0.0506753	0.775973	4.89384
-0.00303391	-0.0313116	0.784918	4.994			0.0388504	0.00882215	0.778205	4.97243			0.023917	-0.0492616	0.776361	4.89474
-0.0038668	-0.0306172	0.785033	4.99411			0.03654	0.00789046	0.778464	4.97256			0.0227622	-0.047846	0.776741	4.89562
-0.00468899	-0.0299208	0.785145	4.99421			0.0342433	0.00696789	0.778722	4.97273			0.0216122	-0.0464288	0.777113	4.89648
-0.00550035	-0.0292227	0.785254	4.99432			0.031961	0.00605464	0.778979	4.97295			0.0204675	-0.0450108	0.777478	4.89734
-0.00630072	-0.0285232	0.78536	4.99442			0.0296938	0.0051509	0.779235	4.97323			0.0193284	-0.0435925	0.777835	4.89822
-0.00708998	-0.0278225	0.785464	4.99452			0.0274424	0.00425686	0.779489	4.97358			0.0181951	-0.0421746	0.778184	4.89912
-0.00786799	-0.0271211	0.785565	4.99462			0.0252073	0.00337272	0.779743	4.97399			0.0170681	-0.0407576	0.778526	4.90005
-0.00863463	-0.0264192	0.785663	4.99472			0.0229893	0.00249863	0.779995	4.97447			0.0159476	-0.0393421	0.778861	4.90101
-0.00938978	-0.025717	0.785758	4.99481			0.0207889	0.00163478	0.780245	4.97499			0.0148339	-0.0379287	0.779188	4.90201
-0.0101333	-0.0250149	0.785851	4.99491			0.0186067	0.00078131	0.780494	4.97555			0.0137273	-0.0365179	0.779508	4.90304
-0.0108652	-0.0243131	0.785941	4.995			0.0164434	-6.16104e-05	0.780741	4.97612			0.0126281	-0.0351103	0.77982	4.9041
-0.0115852	-0.0236119	0.786029	4.99509			0.0142994	-0.000893838	0.780987	4.9767			0.0115366	-0.0337063	0.780126	4.90517
-0.0122934	-0.0229116	0.786114	4.99518			0.0121753	-0.00171523	0.781231	4.97725			0.0104531	-0.0323066	0.780425	4.90626
-0.0129895	-0.0222124	0.786197	4.99527			0.0100717	-0.00252566	0.781473	4.97778			0.00937786	-0.0309116	0.780717	4.90734
-0.0136736	-0.0215146	0.786278	4.99536			0.00798903	-0.00332499	0.781713	4.97825			0.00831112	-0.0295218	0.781002	4.9084
-0.0143455	-0.0208185	0.786356	4.99544			0.00592785	-0.00411311	0.781951	4.97866			0.00725315	-0.0281378	0.78128	4.90945
-0.0150053	-0.0201242	0.786432	4.99553			0.00388862	-0.0048899	0.782187	4.979			0.00620421	-0.0267599	0.781552	4.91046
-0.0156527	-0.0194321	0.786506	4.99561			0.00187181	-0.00565525	0.78242	4.97928			0.00516455	-0.0253888	0.781817	4.91142
-0.0162878	-0.0187423	0.786577	4.99569			-0.000122119	-0.00640906	0.782652	4.97949			0.00413439	-0.0240248	0.782077	4.91235
-0.0169105	-0.0180552	0.786647	4.99577			-0.00209274	-0.00715123	0.782881	4.97964			0.00311399	-0.0226684	0.782329	4.91322
-0.0175208	-0.0173709	0.786714	4.99585			-0.00403962	-0.00788167	0.783108	4.97975			0.00210356	-0.0213201	0.782576	4.91405
-0.0181185	-0.0166897	0.786779	4.99593			-0.00596237	-0.00860031	0.783332	4.97983			0.00110333	-0.0199803	0.782817	4.91484
-0.0187038	-0.0160118	0.786842	4.996			-0.00786058	-0.00930706	0.783554	4.9799			0.000113516	-0.0186493	0.783051	4.91559
-0.0192765	-0.0153374	0.786904	4.99608			-0.00973389	-0.0100019	0.783774	4.97997			-0.000865682	-0.0173277	0.78328	4.91631
-0.0198366	-0.0146667	0.786963	4.99615			-0.0115819	-0.0106846	0.78399	4.98006			-0.00183406	-0.0160158	0.783503	4.91701
-0.0203842	-0.0139999	0.787021	4.99622			-0.0134044	-0.0113553	0.784205	4.98018			-0.00279141	-0.0147139	0.783721	4.91771
-0.0209191	-0.0133373	0.787077	4.99629			-0.0152009	-0.0120139	0.784416	4.98034			-0.00373756	-0.0134226	0.783933	4.91841
-0.0214414	-0.012679	0.787131	4.99636			-0.0169712	-0.0126602	0.784624	4.98055			-0.00467233	-0.0121421	0.784139	4.91911
-0.0219511	-0.0120252	0.787183	4.99643			-0.0187149	-0.0132943	0.78483	4.98081			-0.00559552	-0.0108728	0.784341	4.91984
-0.0224481	-0.0113761	0.787233	4.9965			-0.0204318	-0.0139162	0.785033	4.98112			-0.00650698	-0.00961508	0.784537	4.92059
-0.0229325	-0.0107319	0.787282	4.99656			-0.0221216	-0.0145257	0.785232	4.98147			-0.00740654	-0.00836924	0.784728	4.92136
-0.0234043	-0.0100927	0.78733	4.99663			-0.0237841	-0.015123	0.785429	4.98187			-0.00829404	-0.00713561	0.784914	4.92216
-0.0238636	-0.00945879	0.787375	4.99669			-0.025419	-0.0157078	0.785623	4.98229			-0.00916934	-0.00591452	0.785095	4.92298
-0.0243102	-0.00883026	0.78742	4.99676			-0.0270261	-0.0162803	0.785814	4.98272			-0.0100323	-0.00470627	0.785272	4.92381
-0.0247443	-0.0082073	0.787462	4.99682			-0.0286052	-0.0168404	0.786001	4.98314			-0.0108827	-0.00351115	0.785444	4.92466
-0.0251658	-0.00759005	0.787504	4.99688			-0.0301561	-0.0173881	0.786186	4.98356			-0.0117206	-0.00232945	0.785611	4.92552
-0.0255748	-0.00697867	0.787544	4.99694			-0.0316786	-0.0179234	0.786367	4.98394			-0.0125456	-0.00116144	0.785774	4.92637
-0.0259714	-0.00637331	0.787582	4.99699			-0.0331725	-0.0184463	0.786545	4.98428			-0.0133578	-7.39679e-06	0.785932	4.92721
-0.0263556	-0.00577412	0.787619	4.99705			-0.0346378	-0.0189568	0.786719	4.98458			-0.0141571	0.00113244	0.786087	4.92803
-0.0267273	-0.00518122	0.787655	4.99711			-0.0360742	-0.019455	0.786891	4.98483			-0.0149432	0.00225781	0.786237	4.92882
-0.0270867	-0.00459477	0.78769	4.99716			-0.0374817	-0.0199407	0.787059	4.98502			-0.0157161	0.0033685	0.786383	4.92958
-0.0274339	-0.00401488	0.787724	4.99722			-0.0388601	-0.0204141	0.787224	4.98516			-0.0164758	0.00446426	0.786525	4.93031
-0.0277688	-0.00344168	0.787756	4.99727			-0.0402093	-0.0208752	0.787385	4.98527			-0.017222	0.00554489	0.786663	4.931
-0.0280915	-0.0028753	0.787787	4.99732			-0.0415293	-0.021324	0.787543	4.98533			-0.0179548	0.00661019	0.786798	4.93166
-0.0284021	-0.00231583	0.787817	4.99737			-0.0428199	-0.0217605	0.787698	4.98538			-0.0186741	0.00765995	0.786929	4.93228
-0.0287007	-0.00176341	0.787846	4.99742			-0.0440812	-0.0221848	0.787849	4.98542			-0.0193797	0.008694	0.787056	4.93288
-0.0289873	-0.00121813	0.787874	4.99747			-0.0453131	-0.0225969	0.787997	4.98546			-0.0200717	0.00971215	0.78718	4.93346
-0.029262	-0.000680095	0.787901	4.99752			-0.0465155	-0.0229968	0.788141	4.98552			-0.0207499	0.0107142	0.7873	4.93403
-0.0295249	-0.000149401	0.787926	4.99757			-0.0476885	-0.0233846	0.788282	4.98561			-0.0214143	0.0117001	0.787417	4.93459
-0.029776	0.000373859	0.787951	4.99761			-0.0488319	-0.0237603	0.78842	4.98572			-0.0220649	0.0126696	0.787531	4.93515
-0.0300155	0.000889597	0.787975	4.99766			-0.049946	-0.0241241	0.788554	4.98588			-0.0227016	0.0136226	0.787642	4.93572
-0.0302434	0.00139773	0.787998	4.9977			-0.0510305	-0.0244759	0.788685	4.98607			-0.0233243	0.014559	0.787749	4.93631
-0.0304598	0.00189818	0.78802	4.99775			-0.0520857	-0.0248158	0.788812	4.98631			-0.0239331	0.0154786	0.787854	4.93691
-0.0306648	0.00239087	0.788042	4.99779			-0.0531114	-0.0251439	0.788936	4.98657			-0.0245279	0.0163813	0.787956	4.93753
-0.0308585	0.00287573	0.788062	4.99783			-0.0541078	-0.0254602	0.789056	4.98687			-0.0251087	0.017267	0.788055	4.93816
-0.031041	0.00335269	0.788082	4.99787			-0.055075	-0.0257648	0.789173	4.98718			-0.0256755	0.0181357	0.788151	4.93881
-0.0312124	0.0038217	0.7881	4.99791			-0.0560129	-0.0260579	0.789287	4.9875			-0.0262282	0.0189873	0.788245	4.93948
-0.0313729	0.00428269	0.788118	4.99795			-0.0569218	-0.0263393	0.789397	4.98782			-0.0267669	0.0198216	0.788336	4.94015
-0.0315224	0.00473562	0.788136	4.99799			-0.0578016	-0.0266093	0.789504	4.98813			-0.0272916	0.0206386	0.788424	4.94082
-0.0316612	0.00518042	0.788152	4.99803			-0.0586525	-0.026868	0.789607	4.98841			-0.0278022	0.0214382	0.78851	4.94149
-0.0317893	0.00561707	0.788168	4.99806			-0.0594747	-0.0271153	0.789708	4.98866			-0.0282988	0.0222204	0.788594	4.94215
-0.0319068	0.0060455	0.788183	4.9981			-0.0602681	-0.0273515	0.789804	4.98887			-0.0287814	0.0229852	0.788675	4.9428
-0.0320139	0.0064657	0.788198	4.99814			-0.061033	-0.0275765	0.789898	4.98905			-0.02925	0.0237325	0.788754	4.94342
-0.0321107	0.00687762	0.788212	4.99817			-0.0617696	-0.0277905	0.789988	4.98918			-0.0297047	0.0244622	0.788831	4.94402
-0.0321973	0.00728123	0.788225	4.99821			-0.0624779	-0.0279935	0.790075	4.98928			-0.0301454	0.0251744	0.788905	4.94459
-0.0322738	0.00767652	0.788238	4.99824			-0.0631581	-0.0281858	0.790159	4.98935			-0.0305722	0.0258691	0.788978	4.94514
-0.0323404	0.00806344	0.78825	4.99827			-0.0638104	-0.0283673	0.79024	4.98939			-0.0309852	0.0265462	0.789049	4.94566
-0.0323971	0.008442	0.788261	4.9983			-0.064435	-0.0285382	0.790317	4.98941			-0.0313843	0.0272057	0.789117	4.94616
-0.0324441	0.00881216	0.788272	4.99834			-0.0650321	-0.0286985	0.790392	4.98943			-0.0317697	0.0278476	0.789184	4.94664
-0.0324816	0.00917393	0.788282	4.99837			-0.0656018	-0.0288484	0.790463	4.98946			-0.0321414	0.0284721	0.789248	4.94711
-0.0325096	0.00952729	0.788292	4.9984			-0.0661444	-0.0289881	0.790531	4.9895			-0.0324994	0.029079	0.789311	4.94756
-0.0325283	0.00987223	0.788301	4.99843			-0.0666601	-0.0291175	0.790596	4.98955			-0.0328439	0.0296684	0.789373	4.94801
-0.0325378	0.0102088	0.78831	4.99846			-0.0671491	-0.0292368	0.790658	4.98964			-0.0331748	0.0302403	0.789432	4.94847
-0.0325383	0.0105369	0.788318	4.99848			-0.0676116	-0.0293462	0.790718	4.98975			-0.0334923	0.0307949	0.78949	4.94893
-0.0325299	0.0108566	0.788326	4.99851			-0.0680478	-0.0294457	0.790774	4.9899			-0.0337963	0.031332	0.789546	4.9494
-0.0325127	0.0111679	0.788334	4.99854			-0.0684581	-0.0295355	0.790827	4.99008			-0.0340871	0.0318519	0.7896	4.94988
-0.0324868	0.0114708	0.78834	4.99857			-0.0688426	-0.0296157	0.790878	4.99028			-0.0343647	0.0323545	0.789653	4.95037
-0.0324525	0.0117654	0.788347	4.99859			-0.0692016	-0.0296864	0.790926	4.9905			-0.0346291	0.03284	0.789704	4.95088
-0.0324099	0.0120516	0.788353	4.99862			-0.0695353	-0.0297477	0.790971	4.99073			-0.0348805	0.0333083	0.789754	4.95139
-0.032359	0.0123295	0.788358	4.99864			-0.0698441	-0.0297998	0.791013	4.99097			-0.035119	0.0337596	0.789802	4.95192
-0.0323	0.0125991	0.788363	4.99867			-0.0701282	-0.0298427	0.791053	4.99121			-0.0353446	0.0341939	0.789849	4.95245
-0.0322332	0.0128604	0.788368	4.99869			-0.0703878	-0.0298767	0.79109	4.99144			-0.0355574	0.0346114	0.789895	4.95298
-0.0321586	0.0131134	0.788372	4.99871			-0.0706233	-0.0299018	0.791125	4.99164			-0.0357576	0.0350122	0.789939	4.95351
-0.0320763	0.0133583	0.788376	4.99874			-0.070835	-0.0299182	0.791157	4.99182			-0.0359453	0.0353962	0.789982	4.95403
-0.0319865	0.0135949	0.788379	4.99876			-0.0710231	-0.0299259	0.791186	4.99198			-0.0361205	0.0357637	0.790023	4.95454
-0.0318894	0.0138234	0.788382	4.99878			-0.0711879	-0.0299252	0.791213	4.9921			-0.0362834	0.0361148	0.790064	4.95503
-0.0317851	0.0140439	0.788385	4.9988			-0.0713297	-0.0299162	0.791238	4.99219			-0.0364342	0.0364495	0.790103	4.9555
-0.0316738	0.0142562	0.788387	4.99883			-0.0714489	-0.029899	0.791261	4.99226			-0.0365728	0.0367681	0.79014	4.95595
-0.0315556	0.0144606	0.788389	4.99885			-0.0715458	-0.0298737	0.791281	4.9923			-0.0366995	0.0370705	0.790177	4.95639
-0.0314306	0.014657	0.78839	4.99887			-0.0716206	-0.0298405	0.791299	4.99232			-0.0368143	0.037357	0.790212	4.9568
-0.031299	0.0148455	0.788391	4.99889			-0.0716736	-0.0297995	0.791314	4.99233			-0.0369175	0.0376277	0.790246	4.9572
-0.0311609	0.0150261	0.788392	4.99891			-0.0717053	-0.0297509	0.791328	4.99234			-0.037009	0.0378827	0.790279	4.95758
-0.0310165	0.0151989	0.788392	4.99893			-0.0717159	-0.0296948	0.79134	4.99235			-0.0370892	0.0381221	0.790311	4.95795
-0.030866	0.015364	0.788392	4.99894			-0.0717058	-0.0296313	0.791349	4.99238			-0.037158	0.0383462	0.790342	4.95832
-0.0307094	0.0155214	0.788392	4.99896			-0.0716752	-0.0295605	0.791356	4.99242			-0.0372156	0.038555	0.790371	4.95868
-0.030547	0.0156712	0.788391	4.99898			-0.0716245	-0.0294827	0.791362	4.99248			-0.0372623	0.0387487	0.7904	4.95905
-0.0303789	0.0158134	0.78839	4.999			-0.0715541	-0.029398	0.791366	4.99257			-0.037298	0.0389275	0.790427	4.95942
-0.0302051	0.0159481	0.788389	4.99902			-0.0714643	-0.0293064	0.791367	4.99268			-0.037323	0.0390915	0.790454	4.9598
-0.030026	0.0160754	0.788387	4.99903			-0.0713554	-0.0292082	0.791368	4.99281			-0.0373374	0.0392409	0.790479	4.96018
-0.0298415	0.0161954	0.788385	4.99905			-0.0712278	-0.0291034	0.791366	4.99296			-0.0373413	0.0393758	0.790503	4.96057
-0.029652	0.016308	0.788383	4.99907			-0.0710818	-0.0289923	0.791362	4.99312			-0.0373349	0.0394965	0.790526	4.96098
-0.0294574	0.0164135	0.78838	4.99908			-0.0709178	-0.028875	0.791357	4.9933			-0.0373184	0.0396031	0.790549	4.96139
-0.029258	0.0165118	0.788377	4.9991			-0.070736	-0.0287515	0.791351	4.99348			-0.0372919	0.0396957	0.79057	4.9618
-0.0290539	0.0166031	0.788373	4.99911			-0.0705369	-0.0286221	0.791342	4.99366			-0.0372555	0.0397746	0.79059	4.96222
-0.0288452	0.0166874	0.78837	4.99913			-0.0703208	-0.028487	0.791333	4.99382			-0.0372094	0.03984	0.790609	4.96264
-0.0286321	0.0167647	0.788365	4.99914			-0.0700881	-0.0283461	0.791322	4.99397			-0.0371538	0.039892	0.790628	4.96306
-0.0284148	0.0168353	0.788361	4.99916			-0.069839	-0.0281998	0.791309	4.9941			-0.0370889	0.0399308	0.790645	4.96347
-0.0281933	0.0168991	0.788356	4.99917			-0.069574	-0.028048	0.791295	4.99421			-0.0370147	0.0399565	0.790661	4.96387
-0.0279678	0.0169563	0.788351	4.99919			-0.0692934	-0.0278911	0.79128	4.9943			-0.0369314	0.0399695	0.790677	4.96425
-0.0277385	0.0170069	0.788346	4.9992			-0.0689976	-0.0277291	0.791263	4.99436			-0.0368392	0.0399699	0.790691	4.96463
-0.0275055	0.017051	0.78834	4.99921			-0.0686868	-0.0275621	0.791246	4.9944			-0.0367383	0.0399578	0.790705	4.96498
-0.0272689	0.0170887	0.788334	4.99923			-0.0683615	-0.0273903	0.791227	4.99443			-0.0366289	0.0399335	0.790717	4.96533
-0.0270288	0.0171201	0.788328	4.99924			-0.0680221	-0.0272139	0.791207	4.99444			-0.036511	0.0398971	0.790729	4.96566
-0.0267855	0.0171453	0.788322	4.99925			-0.0676687	-0.0270329	0.791186	4.99444			-0.0363849	0.039849	0.79074	4.96597
-0.026539	0.0171644	0.788315	4.99926			-0.0673019	-0.0268476	0.791163	4.99445			-0.0362507	0.0397892	0.790749	4.96628
-0.0262895	0.0171774	0.788307	4.99928			-0.066922	-0.026658	0.79114	4.99445			-0.0361085	0.039718	0.790758	4.96658
-0.0260371	0.0171845	0.7883	4.99929			-0.0665293	-0.0264644	0.791116	4.99447			-0.0359586	0.0396355	0.790766	4.96687
-0.0257819	0.0171858	0.788292	4.9993			-0.0661241	-0.0262668	0.791091	4.99449			-0.0358012	0.0395421	0.790773	4.96717
-0.0255241	0.0171813	0.788284	4.99931			-0.0657069	-0.0260654	0.791065	4.99454			-0.0356363	0.0394378	0.79078	4.96746
-0.0252638	0.0171711	0.788276	4.99932			-0.0652779	-0.0258602	0.791038	4.9946			-0.0354641	0.039323	0.790785	4.96776
-0.0250011	0.0171553	0.788267	4.99933			-0.0648375	-0.0256516	0.79101	4.99468			-0.0352849	0.0391977	0.790789	4.96806
-0.0247362	0.0171341	0.788258	4.99935			-0.064386	-0.0254395	0.790982	4.99478			-0.0350987	0.0390623	0.790793	4.96837
-0.0244692	0.0171075	0.788249	4.99936			-0.0639238	-0.0252242	0.790953	4.9949			-0.0349058	0.0389168	0.790795	4.96868
-0.0242002	0.0170757	0.788239	4.99937			-0.0634513	-0.0250058	0.790923	4.99502			-0.0347063	0.0387616	0.790797	4.969
-0.0239293	0.0170386	0.788229	4.99938			-0.0629687	-0.0247843	0.790892	4.99515			-0.0345004	0.0385969	0.790798	4.96933
-0.0236566	0.0169965	0.788219	4.99939			-0.0624764	-0.02456	0.790861	4.99529			-0.0342882	0.0384228	0.790798	4.96966
-0.0233823	0.0169494	0.788209	4.9994			-0.0619748	-0.0243329	0.790829	4.99542			-0.0340699	0.0382396	0.790797	4.96999
-0.0231066	0.0168974	0.788198	4.99941			-0.0614641	-0.0241032	0.790797	4.99554			-0.0338457	0.0380474	0.790796	4.97032
-0.0228294	0.0168406	0.788187	4.99942			-0.0609448	-0.0238711	0.790764	4.99565			-0.0336158	0.0378466	0.790793	4.97064
-0.0225509	0.0167791	0.788176	4.99943			-0.0604171	-0.0236365	0.790731	4.99575			-0.0333802	0.0376372	0.79079	4.97097
-0.0222713	0.0167131	0.788164	4.99943			-0.0598813	-0.0233998	0.790697	4.99582			-0.0331392	0.0374195	0.790785	4.97128
-0.0219907	0.0166425	0.788152	4.99944			-0.0593378	-0.023161	0.790662	4.99588			-0.032893	0.0371938	0.79078	4.97159
-0.0217091	0.0165676	0.78814	4.99945			-0.058787	-0.0229202	0.790628	4.99593			-0.0326416	0.0369602	0.790774	4.97188
-0.0214267	0.0164884	0.788128	4.99946			-0.058229	-0.0226776	0.790593	4.99595			-0.0323853	0.036719	0.790768	4.97216
-0.0211435	0.016405	0.788115	4.99947			-0.0576643	-0.0224332	0.790557	4.99597			-0.0321242	0.0364703	0.79076	4.97244
-0.0208598	0.0163175	0.788102	4.99948			-0.0570932	-0.0221872	0.790521	4.99597			-0.0318585	0.0362143	0.790752	4.9727
-0.0205756	0.016226	0.788089	4.99949			-0.0565159	-0.0219398	0.790485	4.99597			-0.0315883	0.0359513	0.790742	4.97295
-0.0202909	0.0161307	0.788076	4.9995			-0.0559328	-0.0216909	0.790449	4.99597			-0.0313138	0.0356815	0.790732	4.9732
-0.020006	0.0160315	0.788062	4.9995			-0.0553442	-0.0214409	0.790412	4.99597			-0.0310352	0.0354051	0.790722	4.97343
-0.0197209	0.0159287	0.788048	4.99951			-0.0547504	-0.0211896	0.790375	4.99598			-0.0307525	0.0351223	0.79071	4.97367
-0.0194356	0.0158222	0.788034	4.99952			-0.0541516	-0.0209374	0.790338	4.996			-0.0304661	0.0348333	0.790698	4.97391
-0.0191504	0.0157123	0.78802	4.99953			-0.0535482	-0.0206843	0.7903	4.99603			-0.030176	0.0345383	0.790685	4.97414
-0.0188653	0.015599	0.788005	4.99953			-0.0529405	-0.0204303	0.790263	4.99608			-0.0298823	0.0342375	0.790671	4.97438
-0.0185803	0.0154824	0.78799	4.99954			-0.0523288	-0.0201757	0.790225	4.99614			-0.0295853	0.0339311	0.790656	4.97462
-0.0182957	0.0153626	0.787975	4.99955			-0.0517132	-0.0199205	0.790187	4.99621			-0.0292851	0.0336193	0.79064	4.97487
-0.0180114	0.0152397	0.78796	4.99956			-0.0510942	-0.0196648	0.790149	4.9963			-0.0289818	0.0333023	0.790624	4.97512
-0.0177275	0.0151138	0.787945	4.99956			-0.0504721	-0.0194087	0.790111	4.99639			-0.0286756	0.0329803	0.790607	4.97537
-0.0174443	0.014985	0.787929	4.99957			-0.0498469	-0.0191524	0.790073	4.99649			-0.0283666	0.0326536	0.79059	4.97563
-0.0171616	0.0148534	0.787913	4.99958			-0.0492192	-0.0188959	0.790035	4.99659			-0.028055	0.0323222	0.790571	4.97589
-0.0168797	0.014719	0.787897	4.99958			-0.048589	-0.0186393	0.789997	4.99669			-0.0277409	0.0319865	0.790552	4.97615
-0.0165985	0.0145821	0.78788	4.99959			-0.0479568	-0.0183828	0.789959	4.99678			-0.0274244	0.0316465	0.790532	4.97641
-0.0163183	0.0144426	0.787864	4.9996			-0.0473226	-0.0181264	0.78992	4.99686			-0.0271058	0.0313025	0.790512	4.97667
-0.016039	0.0143007	0.787847	4.9996			-0.0466869	-0.0178702	0.789882	4.99693			-0.0267851	0.0309547	0.79049	4.97693
-0.0157607	0.0141565	0.78783	4.99961			-0.0460498	-0.0176143	0.789844	4.99698			-0.0264626	0.0306032	0.790469	4.97717
-0.0154836	0.01401	0.787813	4.99962			-0.0454116	-0.0173589	0.789805	4.99703			-0.0261382	0.0302483	0.790446	4.97741
-0.0152076	0.0138614	0.787796	4.99962			-0.0447726	-0.0171039	0.789767	4.99705			-0.0258122	0.0298902	0.790423	4.97765
-0.0149329	0.0137107	0.787778	4.99963			-0.0441329	-0.0168495	0.789729	4.99707			-0.0254847	0.0295289	0.790399	4.97787
-0.0146595	0.0135581	0.787761	4.99963			-0.0434929	-0.0165957	0.789691	4.99708			-0.0251558	0.0291648	0.790374	4.97809
-0.0143875	0.0134035	0.787743	4.99964			-0.0428527	-0.0163428	0.789653	4.99708			-0.0248257	0.0287979	0.790349	4.97829
-0.014117	0.0132472	0.787725	4.99964			-0.0422125	-0.0160906	0.789615	4.99707			-0.0244944	0.0284284	0.790323	4.9785
-0.0138479	0.0130892	0.787707	4.99965			-0.0415727	-0.0158394	0.789577	4.99707			-0.0241622	0.0280566	0.790297	4.97869
-0.0135805	0.0129296	0.787689	4.99966			-0.0409335	-0.0155891	0.789539	4.99707			-0.0238291	0.0276826	0.79027	4.97888
-0.0133147	0.0127684	0.78767	4.99966			-0.0402949	-0.0153399	0.789501	4.99707			-0.0234953	0.0273066	0.790243	4.97907
-0.0130507	0.0126058	0.787652	4.99967			-0.0396573	-0.0150919	0.789464	4.99709			-0.0231609	0.0269287	0.790214	4.97926
-0.0127883	0.0124419	0.787633	4.99967			-0.0390209	-0.0148451	0.789426	4.99711			-0.022826	0.0265492	0.790186	4.97945
-0.0125279	0.0122766	0.787614	4.99968			-0.0383858	-0.0145995	0.789389	4.99715			-0.0224907	0.0261681	0.790156	4.97964
-0.0122692	0.0121102	0.787595	4.99968			-0.0377523	-0.0143554	0.789352	4.99719			-0.0221552	0.0257856	0.790127	4.97983
-0.0120126	0.0119427	0.787576	4.99969			-0.0371206	-0.0141126	0.789315	4.99725			-0.0218196	0.0254019	0.790096	4.98003
-0.0117579	0.0117742	0.787557	4.99969			-0.0364908	-0.0138713	0.789278	4.99731			-0.0214839	0.0250172	0.790066	4.98023
-0.0115052	0.0116047	0.787538	4.9997			-0.0358632	-0.0136316	0.789241	4.99739			-0.0211483	0.0246316	0.790034	4.98043
-0.0112546	0.0114343	0.787518	4.9997			-0.0352379	-0.0133935	0.789204	4.99746			-0.0208129	0.0242452	0.790002	4.98064
-0.0110061	0.0112632	0.787499	4.99971			-0.0346151	-0.0131571	0.789168	4.99753			-0.0204778	0.0238583	0.78997	4.98084
-0.0107598	0.0110913	0.787479	4.99971			-0.033995	-0.0129224	0.789132	4.99761			-0.0201431	0.023471	0.789937	4.98105
-0.0105157	0.0109188	0.78746	4.99972			-0.0333777	-0.0126895	0.789096	4.99767			-0.0198089	0.0230833	0.789904	4.98126
[truncated: 1,660 more rows]
